# Supplementary material for: Age-dependent changes in protein incorporation into collagen-rich tissues of mice by in vivo pulsed SILAC labelling
Source: eLife. 2021 Sep 28;10:e66635. doi: 10.7554/eLife.66635 (PMC8478409; doi:10.7554/eLife.66635)
Supplement: Figure 2—source data 1. — Groups A and B shown in Figure 2. Values in red were imputed as follows, missing iBAQ light in >2 samples in group A was assumed to be a consequence of fully labelled protein while missing iBAQ heavy in group B >2 samples as a result of complete turnover. Missing iBAQ light was imputed with the maximum H/L value +0.1 in that column and missing iBAQ heavy with the minimum H/L value –0.01. Only proteins with lysine containing peptides were imputed. [file elife-66635-fig2-data1.xlsx]

## Sheet: Plasma
Ratio H/L A1	Ratio H/L A2	Ratio H/L A3	Mean Ratio H/L A	Ratio H/L B1	Ratio H/L B2	Mean Ratio H/L B	% Heavy isotope A	% Heavy isotope B	Fold change	Log fold change	iBAQ L A1	iBAQ L A2	iBAQ L A3	iBAQ L A	iBAQ H A1	iBAQ H A2	iBAQ H A3	iBAQ H A	iBAQ L B1	iBAQ L B2	iBAQ L B	iBAQ H B1	iBAQ H B2	iBAQ H B	GOBP name	GOMF name	GOCC name	KEGG name	Majority protein IDs	Protein names	Gene names	Matrisome
1.4915	1.694	1.2942	1.49323	0.58095	0.59717	0.58906	59.75	37.07	0.62	-0.69	23.7314	24.1849	22.4501	23.4555	25.3065	26.1965	24.6339	25.379	23.0113	23.3838	23.1976	23.3427	23.1898	23.2663	anatomical structure development;biological regulation;cartilage development;cellular component organization;cellular component organization at cellular level;cellular component organization or biogenesis;cellular component organization or biogenesis at cellular level;cellular process;collagen fibril organization;developmental process;extracellular matrix organization;extracellular structure orga…	binding;collagen binding;protein binding	collagen;extracellular matrix;extracellular matrix part;extracellular membrane-bounded organelle;extracellular organelle;extracellular region part;extracellular space;extracellular vesicular exosome;fibrillar collagen;membrane-bounded organelle;membrane-bounded vesicle;organelle;proteinaceous extracellular matrix;vesicle		P51885	Lumican	Lum	#
4.6538	4.6906	NaN	4.6722	0.16227	0.06324	0.112755	82.37	4.93	0.06	-4.06	18.9307	17.9497	NaN	18.4402	21.1291	19.8597	NaN	20.4944	20.8397	19.4408	20.1402	18.4801	NaN	NaN	adiponectin-mediated signaling pathway;alcohol metabolic process;anatomical structure development;biological regulation;brown fat cell differentiation;carbohydrate homeostasis;carbohydrate metabolic process;carboxylic acid catabolic process;carboxylic acid metabolic process;catabolic process;cell differentiation;cell surface receptor linked signaling pathway;cellular carbohydrate metabolic proces…	binding;carbohydrate binding;hormone activity;identical protein binding;monosaccharide binding;protein binding;protein dimerization activity;protein homodimerization activity;receptor binding;sialic acid binding;sugar binding	cell part;cell periphery;cell surface;collagen;cytoplasmic part;endoplasmic reticulum;extracellular matrix part;extracellular membrane-bounded organelle;extracellular organelle;extracellular region part;extracellular space;extracellular vesicular exosome;intracellular membrane-bounded organelle;intracellular organelle;intracellular part;membrane-bounded organelle;membrane-bounded vesicle;organell…	Adipocytokine signaling pathway;PPAR signaling pathway;Type II diabetes mellitus	Q60994;E9PWU4	Adiponectin	Adipoq	*
5.1554	6.2122	4.6886	5.35207	0.21164	0.06324	0.13744	84.17	4.93	0.06	-4.09	17.8456	16.6186	16.0453	16.8365	20.4808	21.1514	20.8737	20.8353	19.8335	18.0396	18.9366	16.4579	NaN	NaN	behavior;behavioral response to pain;biological adhesion;biological regulation;cell adhesion;cell migration;cell motility;cell-cell adhesion;cellular component movement;cellular process;cellular response to stimulus;cellular response to stress;endothelial cell-cell adhesion;epithelial cell-cell adhesion;locomotion;multicellular organismal process;multicellular organismal response to stress;muscle…	binding;calcium ion binding;carbohydrate binding;cation binding;glycosaminoglycan binding;heparin binding;integrin binding;ion binding;metal ion binding;pattern binding;polysaccharide binding;protein binding;protein complex binding;receptor binding	basement membrane;cell part;cytoplasmic part;endoplasmic reticulum;extracellular matrix;extracellular matrix part;extracellular membrane-bounded organelle;extracellular organelle;extracellular region part;extracellular space;extracellular vesicular exosome;intracellular membrane-bounded organelle;intracellular organelle;intracellular part;membrane-bounded organelle;membrane-bounded vesicle;organe…	ECM-receptor interaction;Focal adhesion;Malaria;Phagosome;TGF-beta signaling pathway	Q9Z1T2	Thrombospondin-4	Thbs4	*
5.7551	NaN	6.1797	5.9674	0.02511	0.14215	0.08363	85.64	4.93	0.06	-4.12	16.632	NaN	16.7276	16.6798	19.9456	19.3378	19.861	19.7148	19.2285	19.0967	19.1626	NaN	16.2145	NaN	biological regulation;cell differentiation;cell proliferation;cellular developmental process;cellular macromolecule metabolic process;cellular metabolic process;cellular process;cellular protein metabolic process;developmental process;macromolecule metabolic process;macromolecule modification;metabolic process;negative regulation of biological process;negative regulation of cell migration;negativ…	binding;enzyme activator activity;enzyme regulator activity;fibronectin binding;growth factor binding;insulin-like growth factor binding;insulin-like growth factor I binding;insulin-like growth factor II binding;phosphatase activator activity;phosphatase regulator activity;protein binding;protein phosphatase activator activity;protein phosphatase regulator activity;protein tyrosine phosphatase ac…	cell part;extracellular membrane-bounded organelle;extracellular organelle;extracellular region part;extracellular space;extracellular vesicular exosome;intracellular membrane-bounded organelle;intracellular organelle;intracellular part;membrane-bounded organelle;membrane-bounded vesicle;nucleus;organelle;vesicle	p53 signaling pathway	P47878	Insulin-like growth factor-binding protein 3	Igfbp3	*
6.8123	6.7599	6.8095	6.7939	0.122	0.11588	0.11894	87.17	10.63	0.12	-3.04	24.8639	25.9528	25.865	25.5605	27.7504	28.6882	28.7289	28.3892	28.3708	28.2232	28.297	25.2647	25.0639	25.1643	antibacterial humoral response;antimicrobial humoral response;biological adhesion;biological regulation;cell adhesion;cell-cell adhesion;cell-matrix adhesion;cell-substrate adhesion;cellular component assembly;cellular component assembly at cellular level;cellular component organization;cellular component organization at cellular level;cellular component organization or biogenesis;cellular compon…	binding;chaperone binding;protein binding;structural molecule activity	blood microparticle;cell cortex;cell part;cell surface;cytoplasmic membrane-bounded vesicle;cytoplasmic part;cytoplasmic vesicle;external side of plasma membrane;extracellular membrane-bounded organelle;extracellular organelle;extracellular region part;extracellular space;extracellular vesicular exosome;fibrinogen complex;intracellular membrane-bounded organelle;intracellular organelle;intracellu…	Complement and coagulation cascades	Q8K0E8	Fibrinogen beta chain;Fibrinopeptide B;Fibrinogen beta chain	Fgb	*
6.6159	7.0238	6.7955	6.81173	0.11492	0.11148	0.1132	87.2	10.17	0.12	-3.1	25.1478	25.9607	25.4826	25.5304	27.8028	28.8309	28.3872	28.3403	28.5848	27.8806	28.2327	25.5653	24.896	25.2307	antibacterial humoral response;antimicrobial humoral response;biological adhesion;biological regulation;blood coagulation;blood coagulation, common pathway;cell adhesion;cell-cell adhesion;cell-matrix adhesion;cell-substrate adhesion;cellular component assembly;cellular component assembly at cellular level;cellular component organization;cellular component organization at cellular level;cellular …	structural molecule activity	blood microparticle;cell cortex;cell part;cell surface;cytoplasmic membrane-bounded vesicle;cytoplasmic part;cytoplasmic vesicle;external side of plasma membrane;extracellular membrane-bounded organelle;extracellular organelle;extracellular region part;extracellular space;extracellular vesicular exosome;fibrinogen complex;intracellular membrane-bounded organelle;intracellular organelle;intracellu…	Complement and coagulation cascades	E9PV24	Fibrinogen alpha chain;Fibrinopeptide A;Fibrinogen alpha chain	Fga	*
6.6534	6.8628	6.983	6.83307	0.11604	0.11232	0.11418	87.23	10.25	0.12	-3.09	25.6707	26.1374	26.1185	25.9756	28.3512	29.0519	28.9972	28.8001	28.3887	28.718	28.5533	25.0083	25.4144	25.2113	biological adhesion;biological regulation;cell adhesion;cell-cell adhesion;cell-matrix adhesion;cell-substrate adhesion;cellular component assembly;cellular component assembly at cellular level;cellular component organization;cellular component organization at cellular level;cellular component organization or biogenesis;cellular component organization or biogenesis at cellular level;cellular macr…	binding;cation binding;cell adhesion molecule binding;ion binding;metal ion binding;protein binding;receptor binding;structural molecule activity	blood microparticle;cell cortex;cell part;cell surface;cytoplasmic membrane-bounded vesicle;cytoplasmic part;cytoplasmic vesicle;external side of plasma membrane;extracellular membrane-bounded organelle;extracellular organelle;extracellular region part;extracellular space;extracellular vesicular exosome;fibrinogen complex;intracellular membrane-bounded organelle;intracellular organelle;intracellu…	Complement and coagulation cascades;Staphylococcus aureus infection	Q8VCM7	Fibrinogen gamma chain	Fgg	*
NaN	6.4466	8.4565	7.45155	0.02511	0.080403	0.0527565	88.07	4.93	0.06	-4.16	NaN	18.6563	19.082	18.8691	NaN	22.3127	22.0175	22.1651	20.912	20.3703	20.6412	NaN	16.4847	NaN	biological regulation;brown fat cell differentiation;cell differentiation;cellular developmental process;cellular process;developmental process;fat cell differentiation;positive regulation of angiogenesis;positive regulation of biological process;positive regulation of cell communication;positive regulation of cell proliferation;positive regulation of cellular process;positive regulation of devel…	binding;cytokine receptor binding;protein binding;receptor binding;transforming growth factor beta receptor binding	extracellular membrane-bounded organelle;extracellular organelle;extracellular region part;extracellular space;extracellular vesicular exosome;membrane-bounded organelle;membrane-bounded vesicle;organelle;vesicle		Q91XL1	Leucine-rich HEV glycoprotein	Lrg1	*
5.9162	8.3779	8.1824	7.49217	0.11741	0.11037	0.11389	88.1	10.22	0.12	-3.11	18.9317	22.6767	22.6573	21.4219	24.3478	25.7397	25.6516	25.2464	25.2152	24.0786	24.6469	21.3983	19.6632	20.5308	biological adhesion;biological regulation;cell adhesion;cell adhesion mediated by integrin;cell differentiation;cell-matrix adhesion;cell-substrate adhesion;cellular component organization;cellular component organization at cellular level;cellular component organization or biogenesis;cellular component organization or biogenesis at cellular level;cellular developmental process;cellular process;de…	binding;carbohydrate binding;cargo receptor activity;extracellular matrix binding;glycosaminoglycan binding;heparin binding;integrin binding;pattern binding;polysaccharide binding;protein binding;protein complex binding;receptor activity;receptor binding;scavenger receptor activity	blood microparticle;extracellular matrix;extracellular membrane-bounded organelle;extracellular organelle;extracellular region part;extracellular space;extracellular vesicular exosome;membrane-bounded organelle;membrane-bounded vesicle;organelle;proteinaceous extracellular matrix;vesicle	ECM-receptor interaction;Focal adhesion	P29788	Vitronectin	Vtn	*
7.1788	7.63	7.8431	7.55063	0.11182	0.11573	0.113775	88.3	10.21	0.12	-3.11	22.2631	22.2494	22.0577	22.1901	25.4132	25.4131	25.476	25.4341	25.2419	25.4124	25.3271	21.9996	21.9973	21.9985	acute inflammatory response;acute-phase response;anatomical structure formation involved in morphogenesis;anatomical structure morphogenesis;angiogenesis;biological adhesion;biological regulation;calcium-independent cell-matrix adhesion;cell adhesion;cell differentiation;cell junction assembly;cell junction organization;cell morphogenesis;cell morphogenesis involved in differentiation;cell-matrix…	binding;carbohydrate binding;enzyme activator activity;enzyme binding;enzyme regulator activity;glycosaminoglycan binding;heparin binding;integrin binding;pattern binding;peptidase activator activity;peptidase regulator activity;polysaccharide binding;protease binding;protein binding;protein complex binding;receptor binding	apical plasma membrane;basal lamina;basement membrane;blood microparticle;cell part;cytoplasmic part;endoplasmic reticulum-Golgi intermediate compartment;extracellular matrix;extracellular matrix part;extracellular membrane-bounded organelle;extracellular organelle;extracellular region part;extracellular space;extracellular vesicular exosome;fibrinogen complex;intracellular membrane-bounded organ…	Amoebiasis;Bacterial invasion of epithelial cells;ECM-receptor interaction;Focal adhesion;Pathways in cancer;Regulation of actin cytoskeleton;Small cell lung cancer	B9EHT6;A0A087WSN6;Q3UHL6;A0A087WR50;P11276;B7ZNJ1;A0A087WS56	Fibronectin;Anastellin	Fn1	*
10.248	11.393	11.313	10.9847	0.02511	0.1696	0.097355	91.72	4.93	0.05	-4.22	NaN	NaN	NaN	NaN	19.7666	NaN	21.0973	20.4319	19.0266	18.7595	18.893	NaN	15.4202	NaN	biological adhesion;cell adhesion;cellular process		cell part;extracellular membrane-bounded organelle;extracellular organelle;extracellular region part;extracellular space;extracellular vesicular exosome;intracellular organelle part;intracellular part;membrane-bounded organelle;membrane-bounded vesicle;nuclear part;nucleoplasm;organelle;organelle part;vesicle		P70389	Insulin-like growth factor-binding protein complex acid labile subunit	Igfals	*
10.248	11.393	11.313	10.9847	0.19332	0.06324	0.12828	91.72	4.93	0.05	-4.22	NaN	NaN	NaN	NaN	NaN	19.366	20.8796	20.1228	19.9927	20.7028	20.3478	16.2887	NaN	NaN	biological regulation;cell surface receptor linked signaling pathway;cellular macromolecule metabolic process;cellular metabolic process;cellular process;cellular protein metabolic process;cellular response to stimulus;enzyme linked receptor protein signaling pathway;epidermal growth factor receptor signaling pathway;macromolecule metabolic process;macromolecule modification;metabolic process;neg…	binding;calcium ion binding;catalytic activity;cation binding;epidermal growth factor receptor binding;epidermal growth factor-activated receptor activity;growth factor receptor binding;ion binding;kinase activity;metal ion binding;molecular transducer activity;phosphotransferase activity, alcohol group as acceptor;protein binding;protein kinase activity;protein tyrosine kinase activity;receptor …	extracellular matrix;extracellular membrane-bounded organelle;extracellular organelle;extracellular region part;extracellular space;extracellular vesicular exosome;membrane-bounded organelle;membrane-bounded vesicle;organelle;proteinaceous extracellular matrix;vesicle		Q8BPB5	EGF-containing fibulin-like extracellular matrix protein 1	Efemp1	*
1.5795	0.82416	NaN	1.20183	0.54611	0.68714	0.616625	53.29	37.99	0.71	-0.49	9.77813	10.1209	NaN	9.94951	18.0867	17.9834	NaN	18.0351	18.314	15.3717	16.8428	18.4755	10.7642	14.6198	anatomical structure development;anatomical structure morphogenesis;biological regulation;blood vessel development;cell surface receptor linked signaling pathway;cellular component assembly;cellular component organization;cellular component organization at cellular level;cellular component organization or biogenesis;cellular component organization or biogenesis at cellular level;cellular process;…	binding;binding, bridging;cation binding;extracellular matrix structural constituent;growth factor binding;identical protein binding;ion binding;metal ion binding;platelet-derived growth factor binding;protein binding;protein binding, bridging;SMAD binding;structural molecule activity	collagen;collagen type I;extracellular matrix;extracellular matrix part;extracellular membrane-bounded organelle;extracellular organelle;extracellular region part;extracellular space;extracellular vesicular exosome;fibrillar collagen;membrane-bounded organelle;membrane-bounded vesicle;organelle;vesicle	Amoebiasis;ECM-receptor interaction;Focal adhesion;Protein digestion and absorption	Q01149	Collagen alpha-2(I) chain	Col1a2	+
10.248	11.393	11.313	10.9847	0.54873	0.59433	0.57153	91.72	36.35	0.4	-1.34	NaN	NaN	NaN	NaN	17.6203	19.9966	17.678	18.4317	18.6984	19.1232	18.9108	16.8277	17.8415	17.3346	anatomical structure development;anatomical structure formation involved in morphogenesis;anatomical structure morphogenesis;biological regulation;biomineral tissue development;biosynthetic process;blood vessel development;bone trabecula formation;cartilage development;cartilage development involved in endochondral bone morphogenesis;cell communication;cell differentiation;cellular component asse…	binding;cation binding;extracellular matrix structural constituent;growth factor binding;identical protein binding;ion binding;metal ion binding;platelet-derived growth factor binding;protein binding;structural molecule activity	cell part;collagen;collagen type I;cytoplasm;cytoplasmic membrane-bounded vesicle;cytoplasmic part;cytoplasmic vesicle;endoplasmic reticulum;extracellular matrix;extracellular matrix part;extracellular region part;extracellular space;fibrillar collagen;Golgi apparatus;intracellular membrane-bounded organelle;intracellular organelle;intracellular part;membrane-bounded organelle;membrane-bounded ve…	Amoebiasis;ECM-receptor interaction;Focal adhesion;Protein digestion and absorption	P11087	Collagen alpha-1(I) chain	Col1a1	+
0.6141	0.55136	0.53283	0.566097	0.5179	0.48232	0.50011	36.1	33.32	0.92	-0.12	22.4673	22.1842	22.4882	22.3799	21.6797	21.491	22.3616	21.8441	22.2679	23.8569	23.0624	21.0672	20.8577	20.9624		antigen binding;binding	cell part;extracellular region;integral to membrane;intrinsic to membrane;membrane;membrane part;plasma membrane		A0A075B5P5;P03987	Ig gamma-3 chain C region	Ighg3
0.68665	0.69513	0.69498	0.692253	0.83044	0.70187	0.766155	40.91	43.29	1.06	0.08	25.0112	23.5587	22.0782	23.5494	24.3739	22.9874	21.8617	23.0743	20.9661	21.8387	21.4024	20.9724	20.7852	20.8788	activation of MAPK activity;anatomical structure development;biological regulation;catabolic process;cell activation;cell proliferation;cellular catabolic process;cellular macromolecule metabolic process;cellular metabolic process;cellular process;cellular protein metabolic process;cellular response to chemical stimulus;cellular response to hydrogen peroxide;cellular response to oxidative stress;…	antioxidant activity;binding;catalytic activity;oxidoreductase activity;oxidoreductase activity, acting on paired donors, with incorporation or reduction of molecular oxygen;oxidoreductase activity, acting on peroxide as acceptor;peroxidase activity;peroxiredoxin activity;selenium binding;thioredoxin peroxidase activity	cell part;cytoplasmic part;extracellular membrane-bounded organelle;extracellular organelle;extracellular region part;extracellular vesicular exosome;intracellular membrane-bounded organelle;intracellular organelle;intracellular part;membrane-bounded organelle;membrane-bounded vesicle;mitochondrion;myelin sheath;organelle;vesicle		Q61171;D3Z4A4	Peroxiredoxin-2	Prdx2
0.70042	0.69991	0.89519	0.765173	0.77684	0.67838	0.72761	43.18	42.06	0.97	-0.04	21.1733	19.9998	17.7982	19.6571	20.5767	20.0944	17.686	19.4524	17.4815	17.4618	17.4716	17.1911	16.9106	17.0509	alcohol catabolic process;alcohol metabolic process;anatomical structure development;carbohydrate catabolic process;carbohydrate metabolic process;catabolic process;cell development;cellular carbohydrate catabolic process;cellular carbohydrate metabolic process;cellular developmental process;cellular metabolic process;cellular process;developmental process;erythrocyte development;generation of pr…	bisphosphoglycerate 2-phosphatase activity;bisphosphoglycerate mutase activity;bisphosphoglycerate phosphatase activity;catalytic activity;hydrolase activity;hydrolase activity, acting on ester bonds;intramolecular transferase activity;intramolecular transferase activity, phosphotransferases;isomerase activity;phosphatase activity;phosphoglycerate mutase activity;phosphoric ester hydrolase activi…	extracellular membrane-bounded organelle;extracellular organelle;extracellular region part;extracellular vesicular exosome;membrane-bounded organelle;membrane-bounded vesicle;organelle;vesicle	Glycolysis / Gluconeogenesis	P15327;D3YUE8;D3Z223;D3YYH3	Bisphosphoglycerate mutase;Phosphoglycerate mutase	Bpgm
0.81957	0.73472	0.7407	0.764997	0.76293	0.71641	0.73967	43.31	42.51	0.98	-0.03	33.3312	33.1599	31.7246	32.7386	33.2031	32.752	32.2693	32.7415	32.2435	31.1506	31.6971	31.8348	30.726	31.2804	response to chemical stimulus;response to organic substance;response to stilbenoid;response to stimulus	binding;cation binding;heme binding;ion binding;iron ion binding;metal ion binding;oxygen binding;oxygen transporter activity;substrate-specific transporter activity;tetrapyrrole binding;transition metal ion binding;transporter activity	cell part;cytoplasmic part;cytosolic part;hemoglobin complex;intracellular part;macromolecular complex;myelin sheath;protein complex	African trypanosomiasis;Malaria	Q91VB8;P01942	Hemoglobin subunit alpha	haemaglobin alpha 2;Hba
0.78561	0.7278	0.78986	0.767757	0.73186	0.72083	0.726345	43.41	42.07	0.97	-0.05	32.012	31.8634	30.8106	31.562	31.7047	31.4422	30.3973	31.1814	30.8369	30.273	30.5549	30.1892	29.5145	29.8518	anatomical structure development;biological regulation;cell development;cellular developmental process;cellular process;developmental process;erythrocyte development;negative regulation of biological process;negative regulation of biosynthetic process;negative regulation of cellular biosynthetic process;negative regulation of cellular macromolecule biosynthetic process;negative regulation of cell…	binding;cation binding;heme binding;ion binding;iron ion binding;metal ion binding;oxygen binding;oxygen transporter activity;substrate-specific transporter activity;tetrapyrrole binding;transition metal ion binding;transporter activity	blood microparticle;cell part;cytoplasmic part;cytosolic part;extracellular region part;hemoglobin complex;intracellular part;macromolecular complex;myelin sheath;protein complex	African trypanosomiasis;Malaria	A8DUK4;E9Q223;P02088	Hemoglobin subunit beta-1	Hbbt1;Hbb-bs;Hbb-b1
0.75903	0.7478	1.0669	0.85791	0.75296	0.68191	0.717435	45.83	41.74	0.91	-0.13	25.66	25.0178	22.736	24.4712	25.4303	24.8744	23.0932	24.466	24.6769	21.0666	22.8718	23.6465	19.4677	21.5571	anatomical structure development;anatomical structure morphogenesis;biological regulation;carbon dioxide transport;cation homeostasis;cellular cation homeostasis;cellular chemical homeostasis;cellular homeostasis;cellular ion homeostasis;cellular metabolic process;cellular monovalent inorganic cation homeostasis;cellular process;cellular response to fluid shear stress;cellular response to stimulu…	arylesterase activity;binding;carbonate dehydratase activity;carbon-oxygen lyase activity;carboxylic ester hydrolase activity;catalytic activity;cation binding;hydrolase activity;hydrolase activity, acting on ester bonds;hydro-lyase activity;ion binding;lyase activity;metal ion binding;transition metal ion binding;zinc ion binding	apical part of cell;axon;basolateral plasma membrane;cell part;cell projection;cytoplasm;cytoplasmic part;cytosol;extracellular membrane-bounded organelle;extracellular organelle;extracellular region part;extracellular space;extracellular vesicular exosome;intracellular part;membrane;membrane part;membrane-bounded organelle;membrane-bounded vesicle;microvillus;myelin sheath;neuron projection;orga…	Nitrogen metabolism	P00920	Carbonic anhydrase 2	Ca2
0.19604	5.2692	NaN	2.73262	0.068642	0.58769	0.328166	50.41	16.73	0.33	-1.59	18.7477	16.773	NaN	17.7604	21.0074	19.1782	NaN	20.0928	19.5966	17.7726	18.6846	17.8679	16.9634	17.4157	biological regulation;biosynthetic process;cellular biosynthetic process;cellular macromolecule biosynthetic process;cellular macromolecule metabolic process;cellular metabolic process;cellular process;cellular response to chemical stimulus;cellular response to endogenous stimulus;cellular response to epidermal growth factor stimulus;cellular response to growth factor stimulus;cellular response t…	binding;catalytic activity;enzyme binding;GTP binding;GTPase activity;guanyl nucleotide binding;guanyl ribonucleotide binding;hydrolase activity;hydrolase activity, acting on acid anhydrides;hydrolase activity, acting on acid anhydrides, in phosphorus-containing anhydrides;kinase binding;nucleic acid binding;nucleoside-triphosphatase activity;nucleotide binding;protein binding;protein kinase bind…	cell body;cell cortex part;cell part;cell projection membrane;cell projection part;cortical actin cytoskeleton;cortical cytoskeleton;cytoplasm;cytoplasmic part;cytoskeletal part;cytoskeleton;cytosol;eukaryotic translation elongation factor 1 complex;extracellular membrane-bounded organelle;extracellular organelle;extracellular region part;extracellular space;extracellular vesicular exosome;intrac…	RNA transport	P10126;P62631;D3Z3I8;D3YZ68	Elongation factor 1-alpha 1;Elongation factor 1-alpha 2	Eef1a1;Eef1a2
0.85052	1.8512	0.70564	1.13579	0.54393	0.5827	0.563315	50.88	36.02	0.71	-0.5	23.3636	22.9561	22.5805	22.9667	23.2747	23.79	22.0226	23.0291	23.7605	23.0229	23.3917	23.4301	22.5514	22.9907	activation of immune response;acute inflammatory response;acute inflammatory response to antigenic stimulus;adaptive immune response;adaptive immune response based on somatic recombination of immune receptors built from immunoglobulin superfamily domains;antibacterial humoral response;antibody-dependent cellular cytotoxicity;antimicrobial humoral response;B cell mediated immunity;biological regul…	antigen binding;binding	cell part;external side of plasma membrane;extracellular region;extracellular region part;extracellular space;immunoglobulin complex;immunoglobulin complex, circulating;integral to membrane;intrinsic to membrane;macromolecular complex;membrane;membrane part;plasma membrane;plasma membrane part;protein complex		A0A075B5P4;A0A0A6YWR2;P01868;P01869	Ig gamma-1 chain C region secreted form;Ig gamma-1 chain C region, membrane-bound form	Ighg1
1.8279	1.091	0.61934	1.17941	0.33362	0.64125	0.487435	51.76	31.63	0.61	-0.71	19.6558	18.9284	14.8348	17.8063	20.5758	19.2142	16.8997	18.8966	18.6349	17.2384	17.9366	15.2766	14.9941	15.1354	acylglycerol metabolic process;aerobic respiration;aging;alcohol metabolic process;anatomical structure development;biological regulation;catabolic process;cell differentiation;cellular catabolic process;cellular component assembly;cellular component organization;cellular component organization or biogenesis;cellular developmental process;cellular lipid metabolic process;cellular metabolic proces…	aminoacylase activity;antioxidant activity;binding;catalase activity;catalytic activity;cation binding;coenzyme binding;cofactor binding;enzyme binding;heme binding;hydrolase activity;hydrolase activity, acting on carbon-nitrogen (but not peptide) bonds;hydrolase activity, acting on carbon-nitrogen (but not peptide) bonds, in linear amides;identical protein binding;ion binding;iron ion binding;me…	adherens junction;anchoring junction;cell junction;cell part;cell-substrate adherens junction;cell-substrate junction;cytoplasmic part;cytosol;endoplasmic reticulum;extracellular membrane-bounded organelle;extracellular organelle;extracellular region part;extracellular vesicular exosome;focal adhesion;Golgi apparatus;intracellular membrane-bounded organelle;intracellular organelle;intracellular o…	Amyotrophic lateral sclerosis (ALS);Methane metabolism;Peroxisome;Tryptophan metabolism	P24270;A2AL20	Catalase	Cat
1.0959	1.1902	NaN	1.14305	0.58423	0.79415	0.68919	53.32	40.52	0.76	-0.4	17.858	15.7704	NaN	16.8142	16.17	15.7429	NaN	15.9565	22.364	15.9888	19.1764	20.3116	18.7968	19.5542	multicellular organismal process;muscle contraction;muscle system process;response to activity;response to stimulus;system process	adenyl nucleotide binding;adenyl ribonucleotide binding;ATP binding;binding;catalytic activity;double-stranded RNA binding;hydrolase activity;hydrolase activity, acting on acid anhydrides;hydrolase activity, acting on acid anhydrides, in phosphorus-containing anhydrides;motor activity;nucleic acid binding;nucleoside-triphosphatase activity;nucleotide binding;purine nucleotide binding;purine ribon…	cell part;contractile fiber;cytoplasmic part;cytoskeletal part;cytosol;intracellular non-membrane-bounded organelle;intracellular organelle;intracellular organelle part;intracellular part;macromolecular complex;myofibril;myosin complex;myosin filament;non-membrane-bounded organelle;organelle;organelle part;protein complex	Tight junction;Viral myocarditis	Q5SX39	Myosin-4	Myh4
2.3524	3.4801	1.4284	2.4203	0.18896	0.17037	0.179665	69.42	15.21	0.22	-2.19	22.2181	21.7361	20.7379	21.564	23.7019	23.5694	21.8043	23.0252	23.3877	23.8482	23.618	21.0695	20.93	20.9997	activation of immune response;adaptive immune response;adaptive immune response based on somatic recombination of immune receptors built from immunoglobulin superfamily domains;B cell mediated immunity;biological regulation;cell recognition;cellular component organization;cellular component organization or biogenesis;cellular membrane organization;cellular process;complement activation;complement…	antigen binding;binding	cell part;extracellular region;extracellular region part;extracellular space;immunoglobulin complex;immunoglobulin complex, circulating;integral to membrane;intrinsic to membrane;macromolecular complex;membrane;membrane part;plasma membrane;protein complex		A0A075B5P3;P01867	Ig gamma-2B chain C region	Ighg2b;Igh-3
2.4717	3.1191	1.7664	2.4524	0.228	0.16203	0.195015	70.48	16.12	0.23	-2.13	26.1892	26.4653	18.771	23.8085	27.6587	28.1193	27.0695	27.6158	27.952	28.753	28.3525	25.8201	26.1292	25.9746		antigen binding;binding	cell part;membrane;plasma membrane		A0A075B5P2;P01837	Ig kappa chain C region	Igkc
2.1229	2.2658	2.8549	2.41453	0.53859	0.31285	0.42572	70.54	29.1	0.41	-1.28	16.1492	19.5063	15.7	17.1185	20.1081	21.1837	16.8723	19.388	18.4287	17.9925	18.2106	16.6138	16.3751	16.4945	alcohol catabolic process;alcohol metabolic process;carbohydrate catabolic process;carbohydrate metabolic process;catabolic process;cellular carbohydrate catabolic process;cellular carbohydrate metabolic process;cellular component assembly;cellular component organization;cellular component organization or biogenesis;cellular metabolic process;cellular process;generation of precursor metabolites a…	aldehyde-lyase activity;binding;carbon-carbon lyase activity;catalytic activity;enzyme binding;fructose-bisphosphate aldolase activity;lyase activity;protease binding;protein binding	cell part;contractile fiber part;cytoplasmic part;intracellular membrane-bounded organelle;intracellular organelle;intracellular part;M band;macromolecular complex;membrane;membrane-bounded organelle;mitochondrion;myelin sheath;organelle;organelle part;protein complex;Z disc	Carbon fixation in photosynthetic organisms;Fructose and mannose metabolism;Glycolysis / Gluconeogenesis;Pentose phosphate pathway	A6ZI44;P05064;Q9CPQ9;A6ZI46;D3YWI1;D3YV98	Fructose-bisphosphate aldolase;Fructose-bisphosphate aldolase A	Aldoa;Aldoart1
2.7624	1.8677	2.6961	2.44207	0.49467	0.38941	0.44204	70.63	30.5	0.43	-1.21	21.6613	22.6664	19.6904	21.3393	23.8397	24.0213	21.8375	23.2328	24.971	21.7876	23.3793	18.4778	16.6773	17.5775	alcohol catabolic process;alcohol metabolic process;apoptosis;biological regulation;carbohydrate catabolic process;carbohydrate metabolic process;catabolic process;cell death;cell motility;cellular carbohydrate catabolic process;cellular carbohydrate metabolic process;cellular component movement;cellular component organization;cellular component organization at cellular level;cellular component o…	binding;catalytic activity;coenzyme binding;cofactor binding;cytoskeletal protein binding;enzyme binding;glyceraldehyde-3-phosphate dehydrogenase (NAD+) (phosphorylating) activity;microtubule binding;NAD binding;NADP binding;nucleotide binding;oxidoreductase activity;oxidoreductase activity, acting on the aldehyde or oxo group of donors;oxidoreductase activity, acting on the aldehyde or oxo group…	cell part;cell projection;cell projection part;cilium;cytoplasm;cytoplasmic part;cytoskeleton;cytosol;flagellar fibrous sheath;flagellum part;intracellular membrane-bounded organelle;intracellular non-membrane-bounded organelle;intracellular organelle;intracellular organelle part;intracellular part;membrane-bounded organelle;microtubule cytoskeleton;microtubule-based flagellum part;motile cilium;…	Alzheimer's disease;Glycolysis / Gluconeogenesis	A0A0A0MQF6;P16858;S4R1W1;S4R257;D3YYI5	Glyceraldehyde-3-phosphate dehydrogenase	Gapdh;Gm3839;Gm7293
2.5749	2.31	NaN	2.44245	0.02511	0.27527	0.15019	70.92	4.93	0.07	-3.85	20.2668	20.0938	NaN	20.1803	23.9032	23.357	21.089	22.7831	20.673	21.395	21.034	NaN	18.8947	NaN	biological regulation;cell differentiation;cellular component organization;cellular component organization at cellular level;cellular component organization or biogenesis;cellular component organization or biogenesis at cellular level;cellular developmental process;cellular macromolecule metabolic process;cellular metabolic process;cellular process;cellular protein metabolic process;developmental…	binding;catalytic activity;cis-trans isomerase activity;isomerase activity;peptide binding;peptidyl-prolyl cis-trans isomerase activity	adherens junction;anchoring junction;cell junction;cell part;cell-substrate adherens junction;cell-substrate junction;cytoplasmic part;cytosol;extracellular membrane-bounded organelle;extracellular organelle;extracellular region part;extracellular space;extracellular vesicular exosome;focal adhesion;intracellular membrane-bounded organelle;intracellular organelle;intracellular part;membrane;membr…		P17742	Peptidyl-prolyl cis-trans isomerase A;Peptidyl-prolyl cis-trans isomerase A, N-terminally processed	Ppia
NaN	2.9735	2.2101	2.5918	0.31377	0.43086	0.372315	71.94	26.88	0.37	-1.42	NaN	23.7002	22.7307	23.2154	22.4496	25.0366	23.1653	23.5505	26.147	24.8343	25.4907	24.7371	23.868	24.3025		antigen binding;binding			A0A0B4J1I0;P01631;A0A075B5K8;F6XWB2	Ig kappa chain V-II region 26-10	Igkv1-110;Igkv1-99;Igkv1-115
2.0001	3.0114	3.4679	2.82647	0.15369	0.15637	0.15503	73.36	13.42	0.18	-2.45	25.0401	23.2311	23.9791	24.0834	26.0949	24.3695	25.0651	25.1765	22.5322	22.3984	22.4653	19.4306	19.6017	19.5162	activation of immune response;biological regulation;complement activation;complement activation, lectin pathway;defense response;humoral immune response;immune effector process;immune response;immune system process;innate immune response;macromolecule metabolic process;metabolic process;positive regulation of biological process;positive regulation of immune response;positive regulation of immune …	binding;calcium ion binding;catalytic activity;cation binding;endopeptidase activity;hydrolase activity;identical protein binding;ion binding;metal ion binding;peptidase activity;peptidase activity, acting on L-amino acid peptides;protein binding;protein dimerization activity;protein homodimerization activity;serine hydrolase activity;serine-type endopeptidase activity;serine-type peptidase activ…	extracellular region part;extracellular space	Complement and coagulation cascades;Staphylococcus aureus infection	P98064	Mannan-binding lectin serine protease 1;Mannan-binding lectin serine protease 1 heavy chain;Mannan-binding lectin serine protease 1 light chain	Masp1
2.6634	3.0485	3.3882	3.03337	0.26252	0.29069	0.276605	75.12	21.65	0.29	-1.8	19.1094	21.2325	19.0114	19.7844	22.9836	20.4722	21.6104	21.6887	21.3639	21.7393	21.5516	19.2513	17.8411	18.5462	actin filament-based movement;actin filament-based process;actin-mediated cell contraction;actin-myosin filament sliding;anatomical structure development;cellular component movement;cellular process;developmental process;metabolic process;multicellular organismal process;muscle contraction;muscle filament sliding;muscle system process;muscle tissue development;skeletal muscle tissue development;s…	actin-dependent ATPase activity;ATPase activity;ATPase activity, coupled;binding;calcium ion binding;catalytic activity;cation binding;hydrolase activity;hydrolase activity, acting on acid anhydrides;hydrolase activity, acting on acid anhydrides, in phosphorus-containing anhydrides;ion binding;metal ion binding;motor activity;nucleoside-triphosphatase activity;pyrophosphatase activity;structural …	cell part;cytoskeletal part;extracellular membrane-bounded organelle;extracellular organelle;extracellular region part;extracellular vesicular exosome;intracellular organelle part;intracellular part;macromolecular complex;membrane;membrane-bounded organelle;membrane-bounded vesicle;myosin complex;organelle;organelle part;protein complex;unconventional myosin complex;vesicle	Vascular smooth muscle contraction	Q60605	Myosin light polypeptide 6	Myl6
10.248	11.393	11.313	10.9847	0.02511	0.06324	0.044175	75.7	15.99	0.21	-2.24	NaN	NaN	NaN	20.7984	NaN	NaN	NaN	22.2996	NaN	NaN	22.2273	NaN	NaN	19.6754		antigen binding;binding			P01635	Ig kappa chain V-V region K2		NO GENE NAME
3.6664	3.2173	NaN	3.44185	0.24074	0.33869	0.289715	77.45	22.21	0.29	-1.8	15.9259	17.4855	NaN	16.7057	18.4323	19.1861	NaN	18.8092	18.0777	17.1483	17.613	16.0044	15.5033	15.7538	biological regulation;cell cycle;cellular component assembly;cellular component assembly at cellular level;cellular component disassembly;cellular component disassembly at cellular level;cellular component organization;cellular component organization at cellular level;cellular component organization or biogenesis;cellular component organization or biogenesis at cellular level;cellular macromolecu…	binding;chromatin binding;chromatin DNA binding;core promoter binding;core promoter proximal region DNA binding;core promoter proximal region sequence-specific DNA binding;core promoter sequence-specific DNA binding;damaged DNA binding;DNA binding;enhancer binding;enhancer sequence-specific DNA binding;enzyme binding;histone binding;nucleic acid binding;nucleosomal DNA binding;nucleosome binding;…	cell part;chromatin;chromosomal part;chromosome;chromosome, telomeric region;condensed chromosome;condensed nuclear chromosome;euchromatin;extracellular membrane-bounded organelle;extracellular organelle;extracellular region part;extracellular vesicular exosome;germ cell nucleus;heterochromatin;intracellular membrane-bounded organelle;intracellular non-membrane-bounded organelle;intracellular org…	Systemic lupus erythematosus	Q8CGP6;Q8R1M2;Q8CGP7;Q8CGP5;Q8BFU2;P22752;P27661;F8WIX8;Q8CGP4;Q64523;Q6GSS7	Histone H2A type 1-H;Histone H2A.J;Histone H2A type 1-K;Histone H2A type 1-F;Histone H2A type 3;Histone H2A type 1;Histone H2AX;Histone H2A;Histone H2A type 2-C;Histone H2A type 2-A	Hist1h2ah;H2afj;Hist1h2ak;Hist1h2af;Hist3h2a;Hist1h2ab;H2afx;Hist1h2al;Hist1h2aa;Hist2h2ac;Hist2h2aa1
3.6165	3.3009	NaN	3.4587	0.33353	0.32661	0.33007	77.55	24.81	0.32	-1.64	21.4967	21.3988	NaN	21.4478	23.6678	22.9032	17.7402	21.4371	22.2117	22.3162	22.264	21.0682	20.6096	20.8389		antigen binding;binding			A0A075B5X9;P01754;P01753;P01751	Ig heavy chain V region 1-62-3;Ig heavy chain V region 186-1;Ig heavy chain V region B1-8/186-2	Ighv1-72;Ighv1-62-3
3.4921	3.3838	3.5606	3.47883	0.31802	0.26805	0.293035	77.67	22.6	0.29	-1.78	16.914	17.5313	17.7189	17.3881	18.5848	21.6965	21.4616	20.581	22.4438	19.4048	20.9243	17.8546	17.3822	17.6184	biological regulation;blood coagulation;cellular macromolecule metabolic process;cellular metabolic process;cellular process;cellular protein metabolic process;coagulation;hemostasis;macromolecule metabolic process;macromolecule modification;metabolic process;multicellular organismal process;peptide cross-linking;primary metabolic process;protein metabolic process;protein modification process;reg…	binding;catalytic activity;cation binding;ion binding;metal ion binding;protein-glutamine gamma-glutamyltransferase activity;transferase activity;transferase activity, transferring acyl groups;transferase activity, transferring amino-acyl groups	blood microparticle;cell part;cytoplasm;extracellular region part;intracellular part	Complement and coagulation cascades	Q8BH61	Coagulation factor XIII A chain	F13a1
NaN	5.8166	2.3103	4.06345	0.02511	0.06324	0.044175	78.57	4.93	0.06	-3.99	NaN	19.4784	18.7663	19.1224	22.6911	22.643	20.788	22.0407	22.8353	23.5509	23.1931	NaN	NaN	NaN	activation of immune response;acute inflammatory response;acute-phase response;aging;biological regulation;cellular component assembly;cellular component assembly at cellular level;cellular component organization;cellular component organization at cellular level;cellular component organization or biogenesis;cellular component organization or biogenesis at cellular level;cellular macromolecular co…	binding;calcium ion binding;cation binding;cholesterol binding;complement binding;complement component C1q binding;ion binding;lipid binding;lipoprotein particle binding;lipoprotein particle receptor binding;low-density lipoprotein particle binding;low-density lipoprotein particle receptor binding;metal ion binding;opsonin binding;protein binding;protein-lipid complex binding;receptor binding;ste…	cell part;cell projection;cell projection part;extracellular membrane-bounded organelle;extracellular organelle;extracellular region part;extracellular space;extracellular vesicular exosome;filopodium;growth cone;membrane-bounded organelle;membrane-bounded vesicle;organelle;site of polarized growth;vesicle		P14847	C-reactive protein	Crp
3.7694	3.6666	3.6475	3.6945	0.26743	0.22671	0.24707	78.7	19.76	0.25	-1.99	22.5695	21.7047	19.9584	21.4109	24.7225	24.1054	22.1417	23.6565	23.7983	23.9942	23.8962	21.1794	21.4396	21.3095	actin cytoskeleton organization;actin filament organization;actin filament-based movement;actin filament-based process;actin-mediated cell contraction;actin-myosin filament sliding;actomyosin structure organization;anatomical structure development;anatomical structure formation involved in morphogenesis;anatomical structure homeostasis;anatomical structure morphogenesis;ATP-dependent chromatin re…	adenyl nucleotide binding;adenyl ribonucleotide binding;ATP binding;ATPase activity;binding;catalytic activity;core promoter proximal region DNA binding;core promoter proximal region sequence-specific DNA binding;cytoskeletal protein binding;DNA binding;enhancer binding;enhancer sequence-specific DNA binding;enzyme binding;hydrolase activity;hydrolase activity, acting on acid anhydrides;hydrolase…	actin cytoskeleton;actin filament;actomyosin, actin part;adherens junction;anchoring junction;axon;blood microparticle;cell cortex part;cell junction;cell part;cell periphery;cell projection;cell-substrate adherens junction;cell-substrate junction;chromatin;chromosomal part;contractile fiber;contractile fiber part;cortical cytoskeleton;costamere;cytoplasm;cytoplasmic part;cytoskeletal part;cytosk…	Adherens junction;Arrhythmogenic right ventricular cardiomyopathy (ARVC);Bacterial invasion of epithelial cells;Dilated cardiomyopathy;Focal adhesion;Hypertrophic cardiomyopathy (HCM);Leukocyte transendothelial migration;Pathogenic Escherichia coli infection;Phagosome;Phototransduction - fly;Regulation of actin cytoskeleton;Shigellosis;Tight junction;Vibrio cholerae infection;Viral myocarditis	P60710;P63260;E9Q1F2;E9Q5F4;G3UZ07	Actin, cytoplasmic 1;Actin, cytoplasmic 1, N-terminally processed;Actin, cytoplasmic 2;Actin, cytoplasmic 2, N-terminally processed	Actb;Actg1
3.6183	NaN	4.7954	4.20685	0.02511	0.57306	0.299085	80.64	4.93	0.06	-4.03	20.1403	NaN	17.1742	18.6572	21.8671	22.1327	19.8103	21.27	21.8007	20.893	21.3468	NaN	19.0895	NaN		antigen binding;binding			A0A075B5R5	Immunoglobulin heavy variable 4-1	Ighv4-1
4.4473	4.547	NaN	4.49715	0.55044	0.06324	0.30684	81.81	4.93	0.06	-4.05	20.8338	20.3256	NaN	20.5797	23.1818	22.6897	NaN	22.9357	21.614	18.2875	19.9507	20.9734	NaN	NaN	actin cytoskeleton organization;actin filament organization;actin filament-based movement;actin filament-based process;actin-mediated cell contraction;actin-myosin filament sliding;actomyosin structure organization;anatomical structure development;anatomical structure formation involved in morphogenesis;anatomical structure morphogenesis;biological regulation;cardiac muscle contraction;cardiac mu…	adenyl nucleotide binding;adenyl ribonucleotide binding;ATP binding;ATPase activity;binding;catalytic activity;cytoskeletal protein binding;enzyme binding;hydrolase activity;hydrolase activity, acting on acid anhydrides;hydrolase activity, acting on acid anhydrides, in phosphorus-containing anhydrides;kinase binding;myosin binding;nucleoside-triphosphatase activity;nucleotide binding;protein bind…	actin cytoskeleton;actin filament;actin filament bundle;actomyosin;actomyosin, actin part;adherens junction;anchoring junction;blood microparticle;cell junction;cell part;cell periphery;cell-substrate adherens junction;cell-substrate junction;contractile fiber;contractile fiber part;cytoplasm;cytoplasmic part;cytoskeletal part;cytoskeleton;extracellular membrane-bounded organelle;extracellular or…	Cardiac muscle contraction;Dilated cardiomyopathy;Hypertrophic cardiomyopathy (HCM);Vascular smooth muscle contraction	P68134;P68033;P63268;P62737;D3YZY0	Actin, alpha skeletal muscle;Actin, alpha cardiac muscle 1;Actin, gamma-enteric smooth muscle;Actin, aortic smooth muscle	Acta1;Actc1;Actg2;Acta2
3.6476	5.6457	6.015	5.10277	0.17753	0.15226	0.164895	83.29	14.12	0.17	-2.56	18.9252	18.2101	18.0168	18.384	20.9272	20.8987	20.2558	20.6939	20.5859	20.1739	20.3799	17.7125	17.066	17.3893	anatomical structure development;biological regulation;cell differentiation;cell junction maintenance;cell junction organization;cell projection organization;cell proliferation;cell surface receptor linked signaling pathway;cell-cell junction maintenance;cell-cell junction organization;cellular component maintenance;cellular component maintenance at cellular level;cellular component organization;…	adenyl nucleotide binding;adenyl ribonucleotide binding;ATP binding;binding;catalytic activity;cytokine binding;enzyme binding;identical protein binding;kinase activity;macrophage colony-stimulating factor receptor activity;molecular transducer activity;nucleotide binding;phosphatase binding;phosphotransferase activity, alcohol group as acceptor;protein binding;protein dimerization activity;prote…	cell part;cell surface;integral to membrane;intrinsic to membrane;membrane;membrane part;plasma membrane	Cytokine-cytokine receptor interaction;Endocytosis;Hematopoietic cell lineage;Osteoclast differentiation;Pathways in cancer	P09581	Macrophage colony-stimulating factor 1 receptor	Csf1r
5.5376	5.1765	NaN	5.35705	0.16355	0.23802	0.200785	84.26	16.48	0.2	-2.35	22.3263	22.5039	NaN	22.4151	24.7837	24.9452	21.1856	23.6382	23.7884	21.2088	22.4986	21.3451	19.396	20.3705	biological regulation;cell activation;cell activation involved in immune response;cell chemotaxis;cell migration;cell motility;cell surface receptor linked signaling pathway;cellular component movement;cellular process;cellular response to chemical stimulus;cellular response to cytokine stimulus;cellular response to organic substance;cellular response to stimulus;chemokine-mediated signaling path…	binding;chemokine activity;chemokine receptor binding;CXCR chemokine receptor binding;cytokine activity;cytokine receptor binding;G-protein-coupled receptor binding;protein binding;receptor binding	extracellular region part;extracellular space	Chemokine signaling pathway;Cytokine-cytokine receptor interaction	Q9EQI5	Chemokine subfamily B Cys-X-Cys	Ppbp
NaN	5.8167	5.1276	5.47215	0.02511	0.12636	0.075735	84.52	4.93	0.06	-4.1	NaN	19.4093	18.4473	18.9283	21.083	20.8528	20.2104	20.7154	21.5841	20.8817	21.2329	NaN	18.9207	NaN	activation of immune response;biological regulation;complement activation;complement activation, classical pathway;defense response;humoral immune response;immune effector process;immune response;immune system process;innate immune response;macromolecule metabolic process;metabolic process;positive regulation of biological process;positive regulation of immune response;positive regulation of immu…		collagen;extracellular matrix part;extracellular membrane-bounded organelle;extracellular organelle;extracellular region part;extracellular vesicular exosome;membrane-bounded organelle;membrane-bounded vesicle;organelle;vesicle	Chagas disease (American trypanosomiasis);Complement and coagulation cascades;Prion diseases;Staphylococcus aureus infection;Systemic lupus erythematosus	P98086	Complement C1q subcomponent subunit A	C1qa
NaN	4.9112	6.2216	5.5664	0.02511	0.06324	0.044175	84.68	4.93	0.06	-4.1	NaN	19.918	18.8641	19.391	22.0311	22.9591	22.1315	22.3739	21.9599	23.2432	22.6015	NaN	NaN	NaN			cell part;cytoplasm;extracellular region part;extracellular space;intracellular part		G3X9D6	Apolipoprotein N	Apon
5.8373	5.1596	5.735	5.5773	0.13996	0.13137	0.135665	84.78	11.94	0.14	-2.83	14.4556	20.1785	18.6087	17.7476	20.001	23.0797	23.8687	22.3165	22.6471	23.3719	23.0095	19.1248	20.3167	19.7207	activation of immune response;biological regulation;complement activation;complement activation, alternative pathway;defense response;humoral immune response;immune effector process;immune response;immune system process;innate immune response;macromolecule metabolic process;metabolic process;positive regulation of biological process;positive regulation of immune response;positive regulation of im…		extracellular matrix;extracellular region;extracellular region part		P11680	Properdin	Cfp
5.7692	6.0632	5.6965	5.84297	0.14171	0.14867	0.14519	85.38	12.68	0.15	-2.75	30.9184	30.704	30.9223	30.8482	33.498	33.2857	33.7784	33.5207	33.6849	33.7112	33.698	30.3204	30.2945	30.3075	anatomical structure homeostasis;behavior;biological regulation;cell communication;cell killing;cellular process;cellular response to external stimulus;cellular response to extracellular stimulus;cellular response to nutrient levels;cellular response to starvation;cellular response to stimulus;cellular response to stress;circadian behavior;circadian rhythm;circadian sleep/wake cycle process;cytol…	binding;carboxylic acid binding;cation binding;chaperone binding;cofactor binding;DNA binding;drug binding;fatty acid binding;ion binding;lipid binding;metal ion binding;monocarboxylic acid binding;nucleic acid binding;oxygen binding;protein binding;pyridoxal phosphate binding;toxin binding;transition metal ion binding;vitamin B6 binding;vitamin binding;zinc ion binding	basement membrane;blood microparticle;cell part;cytoplasm;extracellular matrix part;extracellular membrane-bounded organelle;extracellular organelle;extracellular region;extracellular region part;extracellular space;extracellular vesicular exosome;intracellular membrane-bounded organelle;intracellular organelle;intracellular part;macromolecular complex;membrane-bounded organelle;membrane-bounded …		P07724	Serum albumin	Alb
6.0372	5.8893	5.7666	5.8977	0.14489	0.14456	0.144725	85.5	12.64	0.15	-2.76	21.7074	21.5161	21.1607	21.4614	24.1876	24.3413	24.0474	24.1921	24.8669	24.2885	24.5777	23.8073	23.3671	23.5872	biological regulation;cation homeostasis;cellular cation homeostasis;cellular chemical homeostasis;cellular homeostasis;cellular ion homeostasis;cellular metal ion homeostasis;cellular monovalent inorganic cation homeostasis;cellular process;cellular sodium ion homeostasis;chemical homeostasis;homeostatic process;immune response;immune system process;ion homeostasis;metal ion homeostasis;monovale…		cell part;extracellular membrane-bounded organelle;extracellular organelle;extracellular region part;extracellular vesicular exosome;macromolecular complex;membrane attack complex;membrane part;membrane-bounded organelle;membrane-bounded vesicle;organelle;plasma membrane part;pore complex;protein complex;vesicle	Complement and coagulation cascades;Prion diseases;Systemic lupus erythematosus	D3YXF5	Complement component 7	C7
5.7639	5.987	6.2433	5.99807	0.13506	0.12029	0.127675	85.7	11.31	0.13	-2.92	22.7048	23.426	22.4851	22.872	26.1228	25.9007	25.5738	25.8658	25.1395	23.8998	24.5196	22.5001	20.7387	21.6194	activation of immune response;biological regulation;complement activation;complement activation, alternative pathway;defense response;humoral immune response;immune effector process;immune response;immune system process;innate immune response;macromolecule metabolic process;metabolic process;positive regulation of biological process;positive regulation of immune response;positive regulation of im…	catalytic activity;endopeptidase activity;hydrolase activity;peptidase activity;peptidase activity, acting on L-amino acid peptides;serine hydrolase activity;serine-type endopeptidase activity;serine-type peptidase activity	extracellular membrane-bounded organelle;extracellular organelle;extracellular region part;extracellular space;extracellular vesicular exosome;membrane-bounded organelle;membrane-bounded vesicle;organelle;vesicle	Complement and coagulation cascades;Staphylococcus aureus infection	P03953	Complement factor D	Cfd
5.775	6.1602	6.275	6.07007	0.15606	0.13308	0.14457	85.85	12.6	0.15	-2.77	23.3572	23.0427	22.9231	23.1077	26.0236	25.6025	25.6995	25.7752	25.9954	26.85	26.4227	23.3159	23.7041	23.51	activation of immune response;activation of MAPK activity;adaptive immune response;adaptive immune response based on somatic recombination of immune receptors built from immunoglobulin superfamily domains;antigen processing and presentation;antigen receptor-mediated signaling pathway;B cell mediated immunity;B cell receptor signaling pathway;biological regulation;cell surface receptor linked sign…	antigen binding;binding;molecular transducer activity;receptor activity;signal transducer activity;signaling receptor activity;transmembrane signaling receptor activity	B cell receptor complex;cell part;cytoplasmic part;external side of plasma membrane;extracellular region part;extracellular space;immunoglobulin complex;immunoglobulin complex, circulating;integral to membrane;intracellular part;intrinsic to membrane;macromolecular complex;membrane;membrane part;perinuclear region of cytoplasm;plasma membrane;plasma membrane part;protein complex;receptor complex		A0A075B5P6;A0A075B6A0;P01872	Ig mu chain C region	Ighm
NaN	6.314	6.2032	6.2586	0.12009	0.18041	0.15025	86.22	12.83	0.15	-2.75	NaN	21.2914	19.0698	20.1806	NaN	23.3058	22.2624	22.7841	23.4812	20.9765	22.2289	20.608	18.5229	19.5655	cellular macromolecule metabolic process;cellular metabolic process;cellular process;cellular protein metabolic process;endosome transport;establishment of localization;establishment of localization in cell;establishment of protein localization;intracellular protein transport;intracellular transport;macromolecule metabolic process;metabolic process;primary metabolic process;protein maturation;pro…	protein transporter activity;substrate-specific transporter activity;transporter activity	cell part;cytoplasmic part;cytosol;early endosome;endosome;extracellular membrane-bounded organelle;extracellular organelle;extracellular region part;extracellular vesicular exosome;integral to membrane;intracellular membrane-bounded organelle;intracellular organelle;intracellular organelle part;intracellular part;intrinsic to membrane;late endosome;lysosomal membrane;macromolecular complex;membr…		Q9EQH3	Vacuolar protein sorting-associated protein 35	Vps35
6.7407	5.9621	6.1237	6.2755	0.42473	0.13068	0.277705	86.24	19.07	0.22	-2.18	23.6205	22.5604	22.4644	22.8818	26.4938	26.0181	25.2964	25.9361	26.91	25.4201	26.165	23.4769	22.6509	23.0639	biological regulation;C21-steroid hormone metabolic process;cellular hormone metabolic process;cellular metabolic process;cellular process;establishment of localization;glucocorticoid metabolic process;hormone metabolic process;lipid metabolic process;metabolic process;negative regulation of catalytic activity;negative regulation of endopeptidase activity;negative regulation of hydrolase activity…	binding;endopeptidase inhibitor activity;endopeptidase regulator activity;enzyme inhibitor activity;enzyme regulator activity;lipid binding;peptidase inhibitor activity;peptidase regulator activity;serine-type endopeptidase inhibitor activity;steroid binding	extracellular membrane-bounded organelle;extracellular organelle;extracellular region part;extracellular space;extracellular vesicular exosome;membrane-bounded organelle;membrane-bounded vesicle;organelle;vesicle		Q06770	Corticosteroid-binding globulin	Serpina6
7.0273	7.3099	5.0123	6.44983	0.15289	0.06324	0.108065	86.42	4.93	0.06	-4.13	18.0343	18.4728	18.5186	18.3419	22.1892	25.5677	22.9099	23.5556	24.3154	20.9871	22.6513	21.1541	NaN	NaN	aerobic respiration;anatomical structure morphogenesis;behavior;biological regulation;carbohydrate homeostasis;cell communication;cell part morphogenesis;cell surface receptor linked signaling pathway;cellular component morphogenesis;cellular component organization;cellular component organization at cellular level;cellular component organization or biogenesis;cellular component organization or bi…	binding;catalytic activity;insulin-activated receptor activity;kinase activity;molecular transducer activity;odorant binding;pheromone binding;phosphotransferase activity, alcohol group as acceptor;protein kinase activity;protein tyrosine kinase activity;receptor activity;signal transducer activity;signaling receptor activity;transferase activity;transferase activity, transferring phosphorus-cont…	cell part;cytoplasmic part;cytosol;extracellular region;extracellular region part;extracellular space;intracellular membrane-bounded organelle;intracellular organelle;intracellular part;membrane-bounded organelle;nucleus;organelle		Q58EV3;A9R9W0;A2CEL1;P11588;E9QA79;L7MUC7;A2CEL0	Major urinary protein 1	Mup1;Mup15;Mup7
6.3744	6.5073	NaN	6.44085	0.11944	0.06324	0.09134	86.56	4.93	0.06	-4.13	20.2006	19.3169	NaN	19.7588	23.3144	22.3968	NaN	22.8556	23.0032	20.0466	21.5249	19.6315	NaN	NaN	acute inflammatory response;acute-phase response;biological regulation;defense response;establishment of localization;inflammatory response;regulation of biological process;regulation of immune system process;response to stimulus;response to stress;response to wounding;transport		extracellular region part;extracellular space		Q60590	Alpha-1-acid glycoprotein 1	Orm1
4.5594	6.5854	9.068	6.7376	0.077752	0.07324	0.075496	86.63	7.02	0.08	-3.63	20.0543	21.8195	21.8731	21.249	24.0726	25.0035	24.7199	24.5987	24.3809	25.1318	24.7563	20.9698	20.983	20.9764	activation of immune response;biological regulation;cell killing;complement activation;complement activation, classical pathway;complement activation, lectin pathway;defense response;defense response to bacterium;defense response to Gram-positive bacterium;disruption by host of symbiont cells;disruption of cells of other organism involved in symbiotic interaction;humoral immune response;immune ef…	binding;calcium ion binding;calcium-dependent protein binding;carbohydrate binding;cation binding;ion binding;mannose binding;metal ion binding;monosaccharide binding;protein binding;receptor binding;sugar binding	collagen;extracellular matrix part;extracellular region part;extracellular space	Complement and coagulation cascades;Phagosome;Staphylococcus aureus infection	P41317	Mannose-binding protein C	Mbl2
6.3945	6.8665	6.4821	6.58103	0.12281	0.11912	0.120965	86.8	10.79	0.12	-3.01	24.0167	24.0867	23.5934	23.8989	26.8541	27.1156	26.8731	26.9476	27.0294	26.2901	26.6597	23.8627	23.1068	23.4848	actin cytoskeleton organization;actin filament capping;actin filament organization;actin filament polymerization;actin filament severing;actin filament-based process;actin nucleation;actin polymerization or depolymerization;aging;anatomical structure development;anatomical structure morphogenesis;barbed-end actin filament capping;biological regulation;cell development;cell part morphogenesis;cell…	actin binding;binding;calcium ion binding;cation binding;cytoskeletal protein binding;ion binding;metal ion binding;myosin binding;myosin II binding;protein binding;protein domain specific binding	actin cap;adherens junction;anchoring junction;blood microparticle;cell cortex part;cell junction;cell part;cell projection;cell-substrate adherens junction;cell-substrate junction;cortical actin cytoskeleton;cortical cytoskeleton;cytoplasm;cytoplasmic part;cytoskeletal part;cytoskeleton;cytosol;extracellular membrane-bounded organelle;extracellular organelle;extracellular region;extracellular re…	Fc gamma R-mediated phagocytosis;Regulation of actin cytoskeleton	P13020	Gelsolin	Gsn
6.5601	6.8571	6.3383	6.58517	0.1273	0.13341	0.130355	86.81	11.53	0.13	-2.91	27.5824	27.7129	26.9492	27.4148	30.665	30.6532	29.7697	30.3626	29.9431	29.6221	29.7826	26.8699	26.4831	26.6765	biological regulation;cell differentiation;cellular developmental process;cellular process;developmental process;embryo implantation;female pregnancy;multi-organism process;negative regulation of biological process;negative regulation of catalytic activity;negative regulation of complement activation;negative regulation of complement activation, lectin pathway;negative regulation of defense respo…	binding;calcium-dependent protein binding;chemokine binding;C-X-C chemokine binding;cytokine binding;endopeptidase inhibitor activity;endopeptidase regulator activity;enzyme binding;enzyme inhibitor activity;enzyme regulator activity;growth factor binding;interleukin-1 binding;interleukin-8 binding;peptidase inhibitor activity;peptidase regulator activity;protease binding;protein binding;receptor…	blood microparticle;extracellular membrane-bounded organelle;extracellular organelle;extracellular region;extracellular region part;extracellular space;extracellular vesicular exosome;membrane-bounded organelle;membrane-bounded vesicle;organelle;vesicle	Complement and coagulation cascades	Q61838;D3YW52	Alpha-2-macroglobulin;Alpha-2-macroglobulin 165 kDa subunit;Alpha-2-macroglobulin 35 kDa subunit	A2m;Pzp
6.8922	6.9951	5.958	6.6151	0.12786	0.10513	0.116495	86.84	10.39	0.12	-3.06	22.5805	21.486	19.486	21.1842	25.4013	24.4408	22.5663	24.1361	24.589	23.4057	23.9974	21.6582	19.6288	20.6435	catabolic process;cellular catabolic process;cellular component assembly;cellular component organization;cellular component organization or biogenesis;cellular metabolic process;cellular process;cellular response to chemical stimulus;cellular response to hydrogen peroxide;cellular response to oxidative stress;cellular response to reactive oxygen species;cellular response to stimulus;cellular resp…	antioxidant activity;binding;catalytic activity;glutathione peroxidase activity;oxidoreductase activity;oxidoreductase activity, acting on peroxide as acceptor;peroxidase activity;selenium binding	extracellular membrane-bounded organelle;extracellular organelle;extracellular region part;extracellular space;extracellular vesicular exosome;membrane-bounded organelle;membrane-bounded vesicle;organelle;vesicle	Arachidonic acid metabolism;Glutathione metabolism	P46412;D3Z2Y7;D3Z7Y0	Glutathione peroxidase 3;Glutathione peroxidase	Gpx3
6.6355	6.7552	6.5807	6.65713	0.10493	0.10827	0.1066	86.94	9.63	0.11	-3.17	21.42	22.0928	21.6964	21.7364	24.8455	24.8249	24.5554	24.7419	25.2764	24.7752	25.0258	21.2909	21.7319	21.5114	alcohol metabolic process;amine metabolic process;aromatic compound catabolic process;biological regulation;blood circulation;carboxylic acid catabolic process;carboxylic acid metabolic process;catabolic process;cellular amine metabolic process;cellular aromatic compound metabolic process;cellular biogenic amine metabolic process;cellular catabolic process;cellular ketone metabolic process;cellul…	aryldialkylphosphatase activity;arylesterase activity;binding;calcium ion binding;carboxylic ester hydrolase activity;catalytic activity;cation binding;high-density lipoprotein particle binding;hydrolase activity;hydrolase activity, acting on ester bonds;identical protein binding;ion binding;lipid binding;lipoprotein particle binding;metal ion binding;phosphatase activity;phospholipid binding;pho…	blood microparticle;cell part;extracellular membrane-bounded organelle;extracellular organelle;extracellular region part;extracellular space;extracellular vesicular exosome;high-density lipoprotein particle;intracellular membrane-bounded organelle;intracellular organelle;intracellular part;macromolecular complex;membrane-bounded organelle;membrane-bounded vesicle;organelle;plasma lipoprotein part…	Aminobenzoate degradation;Bisphenol degradation	P52430;H3BK03	Serum paraoxonase/arylesterase 1	Pon1
6.7317	6.6113	NaN	6.6715	0.1149	0.10823	0.111565	86.96	10.03	0.12	-3.12	19.8308	21.174	NaN	20.5024	22.9816	23.9417	22.948	23.2904	23.0671	21.6966	22.3818	19.362	18.5987	18.9804	activation of immune response;biological regulation;complement activation;complement activation, classical pathway;defense response;humoral immune response;immune effector process;immune response;immune system process;innate immune response;macromolecule metabolic process;metabolic process;positive regulation of biological process;positive regulation of immune response;positive regulation of immu…		extracellular region	Complement and coagulation cascades	P08607	C4b-binding protein	C4bpa
5.8819	7.5158	6.7469	6.71487	0.13926	0.13546	0.13736	86.98	12.08	0.14	-2.85	24.6872	24.407	24.8979	24.6641	27.2472	27.5277	27.8583	27.5444	26.627	27.1814	26.9042	23.7994	24.2924	24.0459	acylglycerol catabolic process;acylglycerol metabolic process;aging;alcohol metabolic process;alpha-amino-3-hydroxy-5-methyl-4-isoxazole propionate receptor clustering;anatomical structure development;anatomical structure morphogenesis;artery morphogenesis;biological regulation;biosynthetic process;blood vessel morphogenesis;calcium ion homeostasis;carboxylic acid transport;cardiovascular system …	antioxidant activity;beta-amyloid binding;binding;carbohydrate binding;cation binding;cholesterol binding;cholesterol transporter activity;cytoskeletal protein binding;enzyme activator activity;enzyme regulator activity;glycosaminoglycan binding;heparin binding;hydroxyapatite binding;identical protein binding;ion binding;lipid binding;lipid transporter activity;lipoprotein particle binding;lipopr…	blood microparticle;cell body;cell part;cell projection;chylomicron;cytoplasmic part;cytoskeletal part;cytosol;dendrite;discoidal high-density lipoprotein particle;early endosome;endoplasmic reticulum;endosome;envelope;extracellular matrix;extracellular membrane-bounded organelle;extracellular organelle;extracellular region;extracellular region part;extracellular space;extracellular vesicular exo…	Alzheimer's disease	P08226;G3UWN5;E9Q327	Apolipoprotein E	Apoe
6.5194	7.0979	6.4697	6.69567	0.12405	0.12522	0.124635	87	11.08	0.13	-2.97	26.1127	26.7021	26.496	26.4369	28.8919	29.6658	29.2891	29.2823	29.0683	28.5232	28.7958	26.0054	25.2657	25.6355	biological regulation;cellular metabolic process;cellular process;cofactor metabolic process;establishment of localization;heme metabolic process;hemoglobin metabolic process;heterocycle metabolic process;macromolecule metabolic process;metabolic process;nitrogen compound metabolic process;pigment metabolic process;porphyrin-containing compound metabolic process;positive regulation of adaptive im…	binding;cation binding;heme binding;ion binding;iron ion binding;metal ion binding;tetrapyrrole binding;transition metal ion binding	blood microparticle;extracellular membrane-bounded organelle;extracellular organelle;extracellular region part;extracellular space;extracellular vesicular exosome;membrane-bounded organelle;membrane-bounded vesicle;organelle;vesicle		Q91X72	Hemopexin	Hpx
5.8713	7.9093	NaN	6.8903	0.089281	0.099902	0.0945915	87.2	8.63	0.1	-3.34	18.6531	18.8398	NaN	18.7465	20.8245	21.6518	21.1747	21.217	21.4125	21.3685	21.3905	17.7999	17.4909	17.6454	acute inflammatory response;biological regulation;blood coagulation;coagulation;defense response;Factor XII activation;fibrinolysis;hemostasis;inflammatory response;kinin cascade;macromolecule metabolic process;metabolic process;multicellular organismal process;negative regulation of biological process;negative regulation of blood coagulation;negative regulation of coagulation;negative regulation…	aminopeptidase activity;catalytic activity;endopeptidase activity;exopeptidase activity;hydrolase activity;peptidase activity;peptidase activity, acting on L-amino acid peptides;serine hydrolase activity;serine-type aminopeptidase activity;serine-type endopeptidase activity;serine-type exopeptidase activity;serine-type peptidase activity	extracellular membrane-bounded organelle;extracellular organelle;extracellular region part;extracellular space;extracellular vesicular exosome;membrane-bounded organelle;membrane-bounded vesicle;organelle;vesicle	Complement and coagulation cascades	Q80YC5	Coagulation factor XII;Coagulation factor XIIa heavy chain;Coagulation factor XIIa light chain	F12
6.7529	6.9568	6.763	6.82423	0.10461	0.11032	0.107465	87.22	9.7	0.11	-3.17	22.1772	22.3668	21.5854	22.0431	25.3332	25.5698	24.597	25.1667	25.2995	24.9881	25.1438	20.8098	21.2667	21.0382			blood microparticle;extracellular membrane-bounded organelle;extracellular organelle;extracellular region part;extracellular vesicular exosome;membrane-bounded organelle;membrane-bounded vesicle;organelle;vesicle		Q9DBB9	Carboxypeptidase N subunit 2	Cpn2
7.4904	8.2131	5.2431	6.9822	0.18127	0.32143	0.25135	87.27	19.44	0.22	-2.17	21.5528	17.6821	18.2445	19.1598	24.9945	21.664	21.2937	22.6507	23.2239	22.4887	22.8563	17.6231	17.7455	17.6843	biological regulation;blood coagulation;carbohydrate homeostasis;cellular chemical homeostasis;cellular glucose homeostasis;cellular homeostasis;cellular process;cellular response to carbohydrate stimulus;cellular response to chemical stimulus;cellular response to glucose stimulus;cellular response to hexose stimulus;cellular response to monosaccharide stimulus;cellular response to organic substa…	binding;carboxypeptidase activity;catalytic activity;cation binding;exopeptidase activity;hydrolase activity;ion binding;metal ion binding;metallocarboxypeptidase activity;metalloexopeptidase activity;metallopeptidase activity;peptidase activity;peptidase activity, acting on L-amino acid peptides;transition metal ion binding;zinc ion binding	extracellular membrane-bounded organelle;extracellular organelle;extracellular region part;extracellular space;extracellular vesicular exosome;membrane-bounded organelle;membrane-bounded vesicle;organelle;vesicle	Complement and coagulation cascades;Pancreatic secretion;Protein digestion and absorption	Q9JHH6	Carboxypeptidase B2	Cpb2
6.6282	7.0261	7.0656	6.90663	0.1138	0.10807	0.110935	87.35	9.98	0.11	-3.13	21.319	21.6889	21.8206	21.6095	24.4643	24.3743	24.946	24.5949	24.6858	24.1448	24.4153	21.2515	20.8823	21.0669	biological regulation;blood coagulation;coagulation;defense response;fibrinolysis;hemostasis;inflammatory response;macromolecule metabolic process;metabolic process;multicellular organismal process;negative regulation of biological process;negative regulation of blood coagulation;negative regulation of coagulation;negative regulation of multicellular organismal process;plasminogen activation;posi…	catalytic activity;endopeptidase activity;hydrolase activity;peptidase activity;peptidase activity, acting on L-amino acid peptides;serine hydrolase activity;serine-type endopeptidase activity;serine-type peptidase activity	extracellular membrane-bounded organelle;extracellular organelle;extracellular region part;extracellular space;extracellular vesicular exosome;membrane-bounded organelle;membrane-bounded vesicle;organelle;vesicle	Complement and coagulation cascades	P26262	Plasma kallikrein;Plasma kallikrein heavy chain;Plasma kallikrein light chain	Klkb1
8.021	5.8261	7.0522	6.96643	0.090676	0.12475	0.107713	87.35	9.61	0.11	-3.18	20.4266	21.983	23.004	21.8046	25.5654	25.6044	24.6658	25.2786	25.1454	25.3044	25.2249	22.2209	22.803	22.5119	activation of immune response;biological regulation;cell killing;cellular component assembly;cellular component organization;cellular component organization or biogenesis;complement activation;complement activation, classical pathway;complement activation, lectin pathway;defense response;defense response to bacterium;defense response to Gram-positive bacterium;disruption by host of symbiont cells…	binding;calcium ion binding;carbohydrate binding;cation binding;ion binding;lipid binding;mannose binding;metal ion binding;monosaccharide binding;pattern binding;phosphatidylinositol binding;phosphatidylinositol-4-phosphate binding;phospholipid binding;polysaccharide binding;sugar binding	collagen;extracellular matrix part;extracellular region part;extracellular space	Complement and coagulation cascades;Phagosome;Staphylococcus aureus infection	P39039	Mannose-binding protein A	Mbl1
7.519	7.0522	6.2998	6.957	0.13068	0.11083	0.120755	87.4	10.74	0.12	-3.02	22.4598	22.5845	22.8991	22.6478	25.2328	26.1709	25.9242	25.776	25.6006	25.2073	25.404	22.3427	22.0154	22.1791	acute inflammatory response;acute-phase response;cell chemotaxis;cell migration;cell motility;cellular component movement;cellular process;cellular response to chemical stimulus;cellular response to stimulus;chemotaxis;defense response;inflammatory response;locomotion;positive chemotaxis;response to chemical stimulus;response to external stimulus;response to stimulus;response to stress;response t…	chemoattractant activity	extracellular region part;extracellular space;high-density lipoprotein particle;macromolecular complex;plasma lipoprotein particle;protein-lipid complex		P31532	Serum amyloid A-4 protein	Saa4
6.8382	7.2777	6.8738	6.99657	0.11672	0.11994	0.11833	87.49	10.58	0.12	-3.05	26.3785	26.2974	25.3816	26.0191	29.1845	29.1617	28.7474	29.0312	29.0375	28.3329	28.6852	25.6029	25.2239	25.4134	embryo implantation;reproductive process	endopeptidase inhibitor activity;endopeptidase regulator activity;enzyme inhibitor activity;enzyme regulator activity;peptidase inhibitor activity;peptidase regulator activity;serine-type endopeptidase inhibitor activity	extracellular region part;extracellular space		P28665	Murinoglobulin-1	Mug1
NaN	NaN	6.3398	6.3398	0.11683	0.10353	0.11018	87.5	9.91	0.11	-3.14	21.3729	NaN	20.287	20.83	21.2283	30.053	24.7424	25.3412	23.2932	26.685	24.9891	20.2842	23.407	21.8456	acute inflammatory response;acute-phase response;biological regulation;carbohydrate metabolic process;cellular carbohydrate metabolic process;cellular macromolecule metabolic process;cellular metabolic process;cellular process;cellular protein metabolic process;chordate embryonic development;defense response;developmental process;embryo development;embryo development ending in birth or egg hatchi…	binding;endopeptidase inhibitor activity;endopeptidase regulator activity;enzyme binding;enzyme inhibitor activity;enzyme regulator activity;glycoprotein binding;identical protein binding;peptidase inhibitor activity;peptidase regulator activity;protease binding;protein binding;serine-type endopeptidase inhibitor activity	cell part;cytoplasmic part;endoplasmic reticulum;extracellular membrane-bounded organelle;extracellular organelle;extracellular region;extracellular region part;extracellular space;extracellular vesicular exosome;Golgi apparatus;intracellular membrane-bounded organelle;intracellular organelle;intracellular part;membrane-bounded organelle;membrane-bounded vesicle;organelle;vesicle	Complement and coagulation cascades	P22599	Alpha-1-antitrypsin 1-2	Serpina1b
7.0284	7.0186	NaN	7.0235	0.15924	0.10349	0.131365	87.54	11.38	0.13	-2.94	16.9897	17.412	NaN	17.2008	20.9929	20.0339	18.9459	19.9909	20.4939	19.8402	20.1671	16.7256	16.1853	16.4554	carbohydrate metabolic process;metabolic process;primary metabolic process	alpha-glucosidase activity;amylase activity;binding;carbohydrate binding;catalytic activity;glucosidase activity;hydrolase activity;hydrolase activity, acting on glycosyl bonds;hydrolase activity, hydrolyzing O-glycosyl compounds;maltose alpha-glucosidase activity	extracellular membrane-bounded organelle;extracellular organelle;extracellular region part;extracellular vesicular exosome;membrane-bounded organelle;membrane-bounded vesicle;organelle;vesicle	Carbohydrate digestion and absorption;Galactose metabolism;Starch and sucrose metabolism	B5THE2	Maltase-glucoamylase	Mgam
7.1738	5.9872	8.125	7.09533	0.11764	0.11952	0.11858	87.56	10.6	0.12	-3.05	18.6348	21.6145	19.1696	19.8063	20.071	24.1717	21.2457	21.8295	23.4439	22.9986	23.2213	20.5107	20.0155	20.2631			cell part;cytoplasmic part;Golgi apparatus;intracellular membrane-bounded organelle;intracellular organelle;intracellular part;membrane-bounded organelle;organelle		D3YXK0	Janus kinase and microtubule-interacting protein 2	Jakmip2
7.1392	7.1738	6.8743	7.06243	0.11641	0.11515	0.11578	87.59	10.38	0.12	-3.08	23.4917	23.7503	23.4278	23.5566	26.4678	26.7099	26.2841	26.4873	26.0992	26.7974	26.4483	22.8549	22.5775	22.7162	biological regulation;cation homeostasis;cation transport;cellular cation homeostasis;cellular chemical homeostasis;cellular homeostasis;cellular ion homeostasis;cellular iron ion homeostasis;cellular metal ion homeostasis;cellular process;chemical homeostasis;copper ion transport;establishment of localization;homeostatic process;ion homeostasis;ion transport;iron ion homeostasis;metabolic proces…	binding;catalytic activity;cation binding;chaperone binding;copper ion binding;ferroxidase activity;ion binding;metal ion binding;oxidoreductase activity;oxidoreductase activity, oxidizing metal ions;oxidoreductase activity, oxidizing metal ions, oxygen as acceptor;protein binding;transition metal ion binding	blood microparticle;cell part;cytoplasmic part;extracellular membrane-bounded organelle;extracellular organelle;extracellular region part;extracellular space;extracellular vesicular exosome;intracellular organelle part;intracellular part;lysosomal membrane;membrane;membrane-bounded organelle;membrane-bounded vesicle;organelle;organelle membrane;organelle part;vacuolar membrane;vacuolar part;vesic…	Porphyrin and chlorophyll metabolism	G3X9T8;G3X8Q5	Ceruloplasmin	Cp
6.2609	8.0815	NaN	7.1712	0.02511	0.10337	0.06424	87.67	4.93	0.06	-4.15	22.5904	21.6321	NaN	22.1112	25.2786	25.1709	20.4452	23.6315	24.7152	23.6834	24.1993	NaN	17.9232	NaN	activation of NF-kappaB-inducing kinase activity;activation of phospholipase C activity;activation of protein kinase activity;aging;anatomical structure development;anatomical structure morphogenesis;angiotensin mediated vasoconstriction involved in regulation of systemic arterial blood pressure;angiotensin-mediated drinking behavior;artery smooth muscle contraction;astrocyte activation;behavior;…	angiotensin receptor binding;binding;channel regulator activity;endopeptidase inhibitor activity;endopeptidase regulator activity;enzyme inhibitor activity;enzyme regulator activity;G-protein-coupled receptor binding;peptidase inhibitor activity;peptidase regulator activity;protein binding;receptor binding;serine-type endopeptidase inhibitor activity;sodium channel regulator activity;type 1 angio…	blood microparticle;cell part;cytoplasm;extracellular membrane-bounded organelle;extracellular organelle;extracellular region part;extracellular space;extracellular vesicular exosome;intracellular part;membrane-bounded organelle;membrane-bounded vesicle;organelle;vesicle	Hypertrophic cardiomyopathy (HCM);Renin-angiotensin system;Vascular smooth muscle contraction	Q3UTR7;P11859	Angiotensinogen;Angiotensin-1;Angiotensin-2;Angiotensin-3;Angiotensin-4;Angiotensin 1-9;Angiotensin 1-7;Angiotensin 1-5;Angiotensin 1-4	Agt
6.847	7.3222	7.2158	7.12833	0.10876	0.11541	0.112085	87.69	10.07	0.11	-3.12	23.9294	23.5121	23.4893	23.6436	27.2127	26.5411	26.4124	26.722	27.197	26.3553	26.7762	22.7297	22.7541	22.7419	biological regulation;blood coagulation;circulatory system process;coagulation;defense response;hemostasis;inflammatory response;multicellular organismal process;negative regulation of catalytic activity;negative regulation of endopeptidase activity;negative regulation of hydrolase activity;negative regulation of molecular function;negative regulation of peptidase activity;regulation of anatomica…	binding;cysteine-type endopeptidase inhibitor activity;endopeptidase inhibitor activity;endopeptidase regulator activity;enzyme inhibitor activity;enzyme regulator activity;peptidase inhibitor activity;peptidase regulator activity;protein binding;receptor binding	blood microparticle;extracellular membrane-bounded organelle;extracellular organelle;extracellular region part;extracellular space;extracellular vesicular exosome;membrane-bounded organelle;membrane-bounded vesicle;organelle;vesicle	Complement and coagulation cascades	O08677;D3YTY9	Kininogen-1;Kininogen-1 heavy chain;Bradykinin;Kininogen-1 light chain	Kng1
7.1997	7.0749	7.1613	7.1453	0.12219	0.11933	0.12076	87.72	10.77	0.12	-3.03	20.4754	18.8617	19.4353	19.5908	23.2971	23.5373	22.9298	23.2547	22.8086	21.8684	22.3385	20.107	19.2312	19.6691	activation of MAPKK activity;activation of protein kinase activity;alkanesulfonate metabolic process;anatomical structure development;anatomical structure morphogenesis;astrocyte activation;behavior;biological adhesion;biological regulation;biosynthetic process;cation homeostasis;cell activation;cell adhesion;cell migration;cell morphogenesis;cell motility;cell part morphogenesis;cell projection …	actin binding;actin filament binding;adenyl nucleotide binding;adenyl ribonucleotide binding;ATP binding;binding;catalytic activity;chromatin binding;cytoskeletal protein binding;enzyme binding;enzyme regulator activity;epidermal growth factor-activated receptor activity;identical protein binding;kinase activity;molecular transducer activity;nitric-oxide synthase regulator activity;nucleotide bin…	adherens junction;anchoring junction;apical plasma membrane;basolateral plasma membrane;cell junction;cell part;cell surface;cell-substrate adherens junction;cell-substrate junction;cytoplasm;cytoplasmic membrane-bounded vesicle;cytoplasmic part;cytoplasmic vesicle;early endosome membrane;endocytic vesicle;endoplasmic reticulum membrane;endoplasmic reticulum part;endosomal part;endosome;endosome …	Adherens junction;Bladder cancer;Calcium signaling pathway;Cytokine-cytokine receptor interaction;Dorso-ventral axis formation;Endocytosis;Endometrial cancer;Epithelial cell signaling in Helicobacter pylori infection;ErbB signaling pathway;Focal adhesion;Gap junction;Glioma;GnRH signaling pathway;Hepatitis C;MAPK signaling pathway;MAPK signaling pathway - fly;Melanoma;Non-small cell lung cancer;P…	Q9WVF5;Q01279	Epidermal growth factor receptor	Egfr
7.0841	6.894	7.4929	7.157	0.12435	0.11786	0.121105	87.73	10.8	0.12	-3.02	19.7493	21.0795	20.1168	20.3152	23.6423	24.5731	24.1707	24.1287	22.9564	22.9877	22.9721	19.6552	19.2413	19.4482	acute inflammatory response;acute-phase response;apoptosis;biological regulation;cell death;cellular process;death;defense response;immune system process;inflammatory response;negative regulation of catalytic activity;negative regulation of endopeptidase activity;negative regulation of hydrolase activity;negative regulation of molecular function;negative regulation of peptidase activity;programme…	cysteine-type endopeptidase inhibitor activity;endopeptidase inhibitor activity;endopeptidase regulator activity;enzyme inhibitor activity;enzyme regulator activity;peptidase inhibitor activity;peptidase regulator activity;serine-type endopeptidase inhibitor activity	blood microparticle;cell part;cytoplasm;extracellular membrane-bounded organelle;extracellular organelle;extracellular region;extracellular region part;extracellular space;extracellular vesicular exosome;intracellular membrane-bounded organelle;intracellular organelle;intracellular part;membrane-bounded organelle;membrane-bounded vesicle;nucleus;organelle;vesicle		G3X8T9;Q91WP6	Serine protease inhibitor A3N	Serpina3n
6.7907	7.555	7.1458	7.16383	0.12708	0.10023	0.113655	87.74	10.14	0.12	-3.11	21.0307	20.3555	19.8148	20.4003	23.8052	23.1974	23.2884	23.4303	23.2768	23.359	23.3179	18.9562	19.9947	19.4754	activation of immune response;biological regulation;complement activation;complement activation, alternative pathway;defense response;humoral immune response;immune effector process;immune response;immune system process;innate immune response;macromolecule metabolic process;metabolic process;positive regulation of biological process;positive regulation of immune response;positive regulation of im…	binding;carbohydrate binding;complement binding;complement component C3b binding;glycoprotein binding;glycosaminoglycan binding;heparan sulfate proteoglycan binding;heparin binding;opsonin binding;pattern binding;polysaccharide binding;protein binding;proteoglycan binding	blood microparticle;extracellular membrane-bounded organelle;extracellular organelle;extracellular region part;extracellular vesicular exosome;membrane-bounded organelle;membrane-bounded vesicle;organelle;vesicle	Complement and coagulation cascades;Staphylococcus aureus infection	E9Q8I0;P06909;E9Q8H9;D6RGQ0;A0A0A6YWP4;A0A0A6YVP8	Complement factor H	Cfh
6.2669	7.2228	8.1617	7.21713	0.098798	0.10035	0.099574	87.77	9.06	0.1	-3.28	22.794	21.5638	23.5552	22.6376	25.8649	25.4788	25.8763	25.74	25.3963	25.319	25.3577	21.7736	21.3592	21.5664	binding of sperm to zona pellucida;biological regulation;cell recognition;cell-cell recognition;cellular process;cellular process involved in reproduction;fertilization;negative regulation of catalytic activity;negative regulation of endopeptidase activity;negative regulation of hydrolase activity;negative regulation of molecular function;negative regulation of peptidase activity;regulation of bi…	cysteine-type endopeptidase inhibitor activity;endopeptidase inhibitor activity;endopeptidase regulator activity;enzyme inhibitor activity;enzyme regulator activity;metalloendopeptidase inhibitor activity;metalloenzyme inhibitor activity;metalloenzyme regulator activity;peptidase inhibitor activity;peptidase regulator activity	extracellular membrane-bounded organelle;extracellular organelle;extracellular region;extracellular region part;extracellular space;extracellular vesicular exosome;membrane-bounded organelle;membrane-bounded vesicle;organelle;vesicle		Q9QXC1;Q6YJU1	Fetuin-B	Fetub
7.7229	6.7295	7.1388	7.19707	0.11385	0.10327	0.10856	87.78	9.78	0.11	-3.17	20.0182	20.0058	20.482	20.1687	24.1359	23.7763	23.9699	23.9607	24.0742	23.4345	23.7544	18.7217	18.5439	18.6328	bradykinin catabolic process;catabolic process;cellular catabolic process;cellular metabolic process;cellular process;metabolic process;peptide catabolic process;peptide metabolic process;response to chemical stimulus;response to corticosteroid stimulus;response to endogenous stimulus;response to glucocorticoid stimulus;response to hormone stimulus;response to organic substance;response to steroi…	binding;carboxypeptidase activity;catalytic activity;cation binding;exopeptidase activity;hydrolase activity;ion binding;metal ion binding;metallocarboxypeptidase activity;metalloexopeptidase activity;metallopeptidase activity;peptidase activity;peptidase activity, acting on L-amino acid peptides;transition metal ion binding;zinc ion binding	extracellular region part;extracellular space		Q9JJN5	Carboxypeptidase N catalytic chain	Cpn1
6.1633	NaN	8.418	7.29065	0.11857	0.17342	0.145995	87.81	12.54	0.14	-2.81	20.42	24.5459	19.1361	21.3673	22.335	19.2006	23.0042	21.5133	21.641	23.0306	22.3358	18.233	19.6677	18.9504	metabolic process	carboxylic ester hydrolase activity;catalytic activity;hydrolase activity;hydrolase activity, acting on ester bonds	extracellular region part;extracellular space		D3Z5G7	Carboxylic ester hydrolase	Ces1b
6.7013	7.971	7.0595	7.24393	0.12078	0.12017	0.120475	87.84	10.75	0.12	-3.03	23.3357	23.5622	24.5505	23.8161	26.2461	26.7189	27.4878	26.8176	26.7049	26.3705	26.5377	22.2939	23.1404	22.7171	establishment of localization;transport;vitamin transport	binding;vitamin binding;vitamin E binding	blood microparticle;extracellular membrane-bounded organelle;extracellular organelle;extracellular region part;extracellular space;extracellular vesicular exosome;membrane-bounded organelle;membrane-bounded vesicle;organelle;vesicle		O89020	Afamin	Afm
7.0801	7.3978	7.2871	7.255	0.10991	0.12058	0.115245	87.88	10.32	0.12	-3.09	29.0005	29.0124	29.0448	29.0192	31.7912	31.8989	31.9064	31.8655	31.0068	31.0607	31.0338	28.4489	27.9733	28.2111	biological regulation;negative regulation of catalytic activity;negative regulation of endopeptidase activity;negative regulation of hydrolase activity;negative regulation of molecular function;negative regulation of peptidase activity;regulation of biological process;regulation of catalytic activity;regulation of endopeptidase activity;regulation of hydrolase activity;regulation of metabolic pro…	endopeptidase inhibitor activity;endopeptidase regulator activity;enzyme inhibitor activity;enzyme regulator activity;peptidase inhibitor activity;peptidase regulator activity;serine-type endopeptidase inhibitor activity	blood microparticle;extracellular membrane-bounded organelle;extracellular organelle;extracellular region part;extracellular space;extracellular vesicular exosome;membrane-bounded organelle;membrane-bounded vesicle;organelle;vesicle		P07759	Serine protease inhibitor A3K	Serpina3k
7.0854	7.3788	7.3492	7.27113	0.11276	0.11259	0.112675	87.91	10.13	0.12	-3.12	28.1741	27.9765	28.3506	28.1671	30.9539	30.8721	31.1205	30.9822	30.8709	30.4916	30.6813	27.4416	27.1591	27.3004	actin cytoskeleton organization;actin filament organization;actin filament-based process;activation of JUN kinase activity;activation of MAPK activity;biological regulation;cation homeostasis;cation transport;cell differentiation;cellular cation homeostasis;cellular chemical homeostasis;cellular component organization;cellular component organization at cellular level;cellular component organizati…	binding;cation binding;cation transmembrane transporter activity;ferric iron binding;ferric iron transmembrane transporter activity;GTP binding;guanyl nucleotide binding;guanyl ribonucleotide binding;inorganic cation transmembrane transporter activity;ion binding;ion transmembrane transporter activity;iron ion binding;iron ion transmembrane transporter activity;metal ion binding;metal ion transme…	apical plasma membrane;basal part of cell;basal plasma membrane;blood microparticle;cell part;cell surface;coated pit;cytoplasmic membrane-bounded vesicle;cytoplasmic part;cytoplasmic vesicle;cytoplasmic vesicle part;early endosome;endocytic vesicle;endosome;extracellular membrane-bounded organelle;extracellular organelle;extracellular region;extracellular region part;extracellular space;extracel…	Mineral absorption	Q921I1;E9Q035	Serotransferrin	Tf;Gm20425
6.7703	7.2282	7.869	7.28917	0.11572	0.12861	0.122165	87.92	10.87	0.12	-3.02	21.3489	21.3841	21.6432	21.4588	24.7554	24.7129	24.7608	24.743	23.1551	24.0829	23.619	19.251	19.4002	19.3256	activation of immune response;alcohol metabolic process;amine metabolic process;biological regulation;blood vessel endothelial cell migration;cell differentiation;cell migration;cell migration involved in sprouting angiogenesis;cell motility;cell surface receptor linked signaling pathway;cellular amine metabolic process;cellular biogenic amine metabolic process;cellular component movement;cellula…	catalytic activity;channel regulator activity;glycosylphosphatidylinositol phospholipase D activity;hydrolase activity;hydrolase activity, acting on ester bonds;lipase activity;phospholipase activity;phospholipase D activity;phosphoric diester hydrolase activity;phosphoric ester hydrolase activity;sodium channel regulator activity	cell part;cytoplasm;cytoplasmic part;extracellular matrix;extracellular membrane-bounded organelle;extracellular organelle;extracellular region;extracellular region part;extracellular space;extracellular vesicular exosome;high-density lipoprotein particle;intracellular;intracellular membrane-bounded organelle;intracellular organelle;intracellular organelle part;intracellular part;lysosomal membra…	Glycosylphosphatidylinositol(GPI)-anchor biosynthesis	Q8VCU2;O70362	Phosphatidylinositol-glycan-specific phospholipase D	Gpld1
7.4286	7.5244	6.9359	7.2963	0.12563	0.10813	0.11688	87.94	10.44	0.12	-3.07	19.7856	20.0778	18.3981	19.4205	23.4521	23.356	23.0362	23.2814	22.0426	22.0034	22.023	18.2187	18.7557	18.4872	activation of immune response;biological regulation;cell death;cellular process;complement activation;complement activation, alternative pathway;complement activation, classical pathway;cytolysis;death;defense response;humoral immune response;immune effector process;immune response;immune system process;innate immune response;macromolecule metabolic process;metabolic process;positive regulation o…		cell part;extracellular membrane-bounded organelle;extracellular organelle;extracellular region part;extracellular space;extracellular vesicular exosome;macromolecular complex;membrane attack complex;membrane part;membrane-bounded organelle;membrane-bounded vesicle;organelle;plasma membrane part;pore complex;protein complex;vesicle	Amoebiasis;Complement and coagulation cascades;Prion diseases;Systemic lupus erythematosus	Q8BH35	Complement component C8 beta chain	C8b
7.2713	7.4227	7.193	7.29567	0.10244	0.12771	0.115075	87.94	10.26	0.12	-3.1	26.1871	26.7889	26.5841	26.52	28.9765	29.5674	29.4542	29.3327	29.0297	28.9609	28.9953	25.9599	26.0652	26.0125	carboxylic acid catabolic process;carboxylic acid metabolic process;catabolic process;cellular catabolic process;cellular ketone metabolic process;cellular lipid catabolic process;cellular lipid metabolic process;cellular metabolic process;cellular process;fatty acid catabolic process;fatty acid metabolic process;lipid catabolic process;lipid metabolic process;metabolic process;monocarboxylic aci…	carboxylic ester hydrolase activity;catalytic activity;hydrolase activity;hydrolase activity, acting on ester bonds	cell part;cytoplasmic part;cytosol;endoplasmic reticulum lumen;endoplasmic reticulum part;extracellular region part;extracellular space;intracellular membrane-bounded organelle;intracellular organelle;intracellular organelle lumen;intracellular organelle part;intracellular part;lipid particle;membrane-bounded organelle;membrane-enclosed lumen;organelle;organelle lumen;organelle part	Drug metabolism - other enzymes;Tropane, piperidine and pyridine alkaloid biosynthesis	P23953	Carboxylesterase 1C	Ces1c
7.1946	7.4184	7.3337	7.31557	0.11453	0.11402	0.114275	87.97	10.26	0.12	-3.1	21.1287	22.16	22.6325	21.9737	23.9314	25.0444	25.5982	24.858	24.509	25.2737	24.8914	21.5657	21.8971	21.7314	biological regulation;negative regulation of catalytic activity;negative regulation of endopeptidase activity;negative regulation of hydrolase activity;negative regulation of molecular function;negative regulation of peptidase activity;regulation of biological process;regulation of catalytic activity;regulation of endopeptidase activity;regulation of hydrolase activity;regulation of metabolic pro…	binding;cysteine-type endopeptidase inhibitor activity;endopeptidase inhibitor activity;endopeptidase regulator activity;enzyme inhibitor activity;enzyme regulator activity;peptidase inhibitor activity;peptidase regulator activity;protein binding;receptor binding	blood microparticle;extracellular membrane-bounded organelle;extracellular organelle;extracellular region part;extracellular space;extracellular vesicular exosome;membrane-bounded organelle;membrane-bounded vesicle;organelle;vesicle	Complement and coagulation cascades	Q6S9I0;Q6S9I2;Q6S9I3	Kininogen 2	Kng2
NaN	6.2453	8.5779	7.4116	0.11543	0.11088	0.113155	87.98	10.16	0.12	-3.11	16.819	18.2513	16.2701	17.1135	21.64	23.0267	21.111	21.9259	21.5404	22.6511	22.0957	16.6994	16.3076	16.5035	biological regulation;chordate embryonic development;developmental process;embryo development;embryo development ending in birth or egg hatching;immune response;immune system process;in utero embryonic development;positive regulation of activation of membrane attack complex;positive regulation of angiogenesis;positive regulation of biological process;positive regulation of complement activation;p…		cell part;extracellular membrane-bounded organelle;extracellular organelle;extracellular region part;extracellular vesicular exosome;macromolecular complex;membrane attack complex;membrane part;membrane-bounded organelle;membrane-bounded vesicle;organelle;plasma membrane part;pore complex;protein complex;vesicle	Complement and coagulation cascades;Prion diseases;Systemic lupus erythematosus	Q91X70;E9Q6D8	Complement component C6	C6
7.0206	7.721	7.2582	7.33327	0.1049	0.1138	0.10935	87.99	9.85	0.11	-3.16	21.228	21.6449	21.9849	21.6193	23.5353	24.8846	24.9341	24.4513	24.6017	24.4164	24.5091	20.3274	20.2194	20.2734	activation of immune response;biological regulation;complement activation;complement activation, classical pathway;defense response;humoral immune response;immune effector process;immune response;immune system process;innate immune response;macromolecule metabolic process;metabolic process;positive regulation of biological process;positive regulation of immune response;positive regulation of immu…	binding;cargo receptor activity;catalytic activity;cation binding;endopeptidase activity;hydrolase activity;ion binding;metal ion binding;peptidase activity;peptidase activity, acting on L-amino acid peptides;receptor activity;scavenger receptor activity;serine hydrolase activity;serine-type endopeptidase activity;serine-type peptidase activity	cell part;extracellular membrane-bounded organelle;extracellular organelle;extracellular region part;extracellular space;extracellular vesicular exosome;intracellular membrane-bounded organelle;intracellular organelle;intracellular part;membrane;membrane-bounded organelle;membrane-bounded vesicle;nucleus;organelle;vesicle	Complement and coagulation cascades;Staphylococcus aureus infection	Q61129	Complement factor I;Complement factor I heavy chain;Complement factor I light chain	Cfi
7.2592	7.4596	7.2665	7.32843	0.12003	0.12246	0.121245	87.99	10.81	0.12	-3.02	18.9715	20.3403	19.3342	19.5487	24.8161	25.0722	24.6518	24.8467	25.1092	24.8449	24.9771	19.8343	18.9966	19.4154	acute inflammatory response;acute-phase response;anatomical structure morphogenesis;biological regulation;blood vessel morphogenesis;cellular component organization;cellular component organization at cellular level;cellular component organization or biogenesis;cellular component organization or biogenesis at cellular level;cellular process;circulatory system process;collagen fibril organization;d…	binding;endopeptidase inhibitor activity;endopeptidase regulator activity;enzyme binding;enzyme inhibitor activity;enzyme regulator activity;identical protein binding;peptidase inhibitor activity;peptidase regulator activity;protease binding;protein binding;protein dimerization activity;protein homodimerization activity;serine-type endopeptidase inhibitor activity	blood microparticle;cell part;cell surface;extracellular membrane-bounded organelle;extracellular organelle;extracellular region part;extracellular space;extracellular vesicular exosome;fibrinogen complex;macromolecular complex;membrane-bounded organelle;membrane-bounded vesicle;organelle;protein complex;vesicle	Complement and coagulation cascades	Q61247;Q5ND35	Alpha-2-antiplasmin	Serpinf2
7.191	7.5518	7.2763	7.3397	0.11096	0.10472	0.10784	88.01	9.73	0.11	-3.18	27.6026	26.2714	25.5252	26.4664	32.4795	29.2379	30.1564	30.6246	30.4793	27.6871	29.0832	25.8447	24.6004	25.2226	biological regulation;negative regulation of catalytic activity;negative regulation of endopeptidase activity;negative regulation of hydrolase activity;negative regulation of molecular function;negative regulation of peptidase activity;regulation of biological process;regulation of catalytic activity;regulation of endopeptidase activity;regulation of hydrolase activity;regulation of metabolic pro…	binding;endopeptidase inhibitor activity;endopeptidase regulator activity;enzyme binding;enzyme inhibitor activity;enzyme regulator activity;glycoprotein binding;identical protein binding;peptidase inhibitor activity;peptidase regulator activity;protease binding;protein binding;serine-type endopeptidase inhibitor activity	cell part;cytoplasmic part;endoplasmic reticulum;extracellular membrane-bounded organelle;extracellular organelle;extracellular region;extracellular region part;extracellular space;extracellular vesicular exosome;Golgi apparatus;intracellular membrane-bounded organelle;intracellular organelle;intracellular part;membrane-bounded organelle;membrane-bounded vesicle;organelle;vesicle	Complement and coagulation cascades	Q00897	Alpha-1-antitrypsin 1-4	Serpina1d
6.6922	7.5448	7.8861	7.37437	0.11145	0.11224	0.111845	88.03	10.06	0.11	-3.13	21.9504	22.1331	21.2862	21.7899	24.9119	25.2045	24.5897	24.902	24.9079	23.6096	24.2588	21.4014	20.3772	20.8893	anatomical structure homeostasis;antigen processing and presentation;antigen processing and presentation of peptide antigen;antigen processing and presentation of peptide antigen via MHC class I;biological adhesion;biological regulation;cell adhesion;cellular process;detection of chemical stimulus;detection of chemical stimulus involved in sensory perception;detection of chemical stimulus involve…	antigen binding;binding;glycoprotein binding;peptide antigen binding;peptide binding;protein binding	cell part;extracellular membrane-bounded organelle;extracellular organelle;extracellular region part;extracellular space;extracellular vesicular exosome;intracellular membrane-bounded organelle;intracellular organelle;intracellular part;macromolecular complex;membrane;membrane part;membrane-bounded organelle;membrane-bounded vesicle;MHC class I protein complex;MHC protein complex;nucleus;organell…		Q64726	Zinc-alpha-2-glycoprotein	Azgp1
7.4449	7.45	7.1928	7.36257	0.10609	0.11704	0.111565	88.04	10.03	0.11	-3.13	20.5251	20.577	19.9001	20.334	23.9047	24.3189	22.7242	23.6493	23.4247	22.4785	22.9516	18.5026	18.8416	18.6721	activation of immune response;biological regulation;calcium ion homeostasis;carbohydrate homeostasis;cation homeostasis;cell death;cell migration;cell motility;cellular calcium ion homeostasis;cellular cation homeostasis;cellular chemical homeostasis;cellular component movement;cellular divalent inorganic cation homeostasis;cellular homeostasis;cellular ion homeostasis;cellular metal ion homeosta…	endopeptidase inhibitor activity;endopeptidase regulator activity;enzyme inhibitor activity;enzyme regulator activity;peptidase inhibitor activity;peptidase regulator activity	cell part;extracellular membrane-bounded organelle;extracellular organelle;extracellular region part;extracellular space;extracellular vesicular exosome;macromolecular complex;membrane attack complex;membrane part;membrane-bounded organelle;membrane-bounded vesicle;organelle;plasma membrane part;pore complex;protein complex;vesicle	Complement and coagulation cascades;Prion diseases;Staphylococcus aureus infection;Systemic lupus erythematosus	P06684	Complement C5;Complement C5 beta chain;Complement C5 alpha chain;C5a anaphylatoxin;Complement C5 alpha chain	C5
7.2263	8.0101	6.9975	7.4113	0.13241	0.11563	0.12402	88.09	11.01	0.12	-3	20.135	19.8367	18.4557	19.4758	23.7513	23.4247	22.0459	23.074	21.739	21.9273	21.8331	18.2105	18.1252	18.1678	acylglycerol catabolic process;acylglycerol metabolic process;alcohol metabolic process;anatomical structure development;anatomical structure morphogenesis;artery morphogenesis;biological regulation;biosynthetic process;blood vessel morphogenesis;catabolic process;cell motility;cellular biosynthetic process;cellular catabolic process;cellular component movement;cellular component organization;cel…	binding;carbohydrate binding;cholesterol transporter activity;enzyme binding;glycosaminoglycan binding;heparin binding;lipase binding;lipid binding;lipid transporter activity;lipoprotein particle receptor binding;low-density lipoprotein particle receptor binding;pattern binding;phospholipid binding;polysaccharide binding;protein binding;receptor binding;sterol transporter activity;substrate-speci…	actin cytoskeleton;cell body;cell part;chylomicron;cytoplasm;cytoplasmic part;cytoskeleton;endoplasmic reticulum;extracellular membrane-bounded organelle;extracellular organelle;extracellular region;extracellular region part;extracellular vesicular exosome;Golgi apparatus;intermediate-density lipoprotein particle;intracellular membrane-bounded organelle;intracellular non-membrane-bounded organell…	Fat digestion and absorption;Vitamin digestion and absorption	E9Q414;E9Q1Y3	Apolipoprotein B-100;Apolipoprotein B-48	Apob
6.9962	7.7772	7.4703	7.41457	0.11041	0.10092	0.105665	88.11	9.55	0.11	-3.21	27.7546	27.4597	27.8819	27.6987	30.5544	30.2971	30.8602	30.5706	30.3783	30.4373	30.4078	27.2537	27.2897	27.2717	amine transport;amino acid transport;biological regulation;carboxylic acid transport;cellular hormone metabolic process;cellular lipid metabolic process;cellular metabolic process;cellular process;diterpenoid metabolic process;establishment of localization;fat-soluble vitamin metabolic process;hormone metabolic process;hormone transport;isoprenoid metabolic process;lipid metabolic process;metabol…	binding;hormone binding;identical protein binding;protein binding;thyroid hormone binding	extracellular membrane-bounded organelle;extracellular organelle;extracellular region part;extracellular space;extracellular vesicular exosome;macromolecular complex;membrane-bounded organelle;membrane-bounded vesicle;organelle;protein complex;vesicle		P07309	Transthyretin	Ttr
7.2017	7.9615	7.1242	7.42913	0.10174	0.10991	0.105825	88.12	9.56	0.11	-3.2	21.4174	21.1842	21.6176	21.4064	24.1154	23.9379	24.4815	24.1782	23.633	24.0759	23.8544	20.3106	20.8464	20.5785	catabolic process;cellular macromolecule metabolic process;cellular metabolic process;cellular process;cellular protein metabolic process;macromolecule catabolic process;macromolecule metabolic process;macromolecule modification;metabolic process;primary metabolic process;protein catabolic process;protein maturation;protein metabolic process;protein modification process;protein-chromophore linkage	binding;cation binding;endopeptidase inhibitor activity;endopeptidase regulator activity;enzyme inhibitor activity;enzyme regulator activity;heme binding;identical protein binding;IgA binding;immunoglobulin binding;ion binding;iron ion binding;metal ion binding;peptidase inhibitor activity;peptidase regulator activity;protein binding;protein complex binding;protein dimerization activity;protein h…	blood microparticle;cell part;cell surface;extracellular membrane-bounded organelle;extracellular organelle;extracellular region part;extracellular space;extracellular vesicular exosome;intracellular membrane-bounded organelle;intracellular organelle;intracellular part;membrane;membrane-bounded organelle;membrane-bounded vesicle;organelle;plasma membrane;vesicle		Q07456	Protein AMBP;Alpha-1-microglobulin;Inter-alpha-trypsin inhibitor light chain;Trypstatin	Ambp
7.2146	7.8537	7.2237	7.43067	0.11888	0.1111	0.11499	88.13	10.31	0.12	-3.1	28.0023	27.1515	27.1752	27.443	30.8428	30.5935	30.0317	30.4893	30.4045	30.0543	30.2294	27.5873	26.4737	27.0305	acute inflammatory response;acute-phase response;biological regulation;defense response;inflammatory response;multicellular organismal process;negative regulation of biological process;negative regulation of biomineral tissue development;negative regulation of bone mineralization;negative regulation of developmental process;negative regulation of multicellular organismal process;negative regulati…	cysteine-type endopeptidase inhibitor activity;endopeptidase inhibitor activity;endopeptidase regulator activity;enzyme inhibitor activity;enzyme regulator activity;peptidase inhibitor activity;peptidase regulator activity	blood microparticle;extracellular membrane-bounded organelle;extracellular organelle;extracellular region part;extracellular space;extracellular vesicular exosome;membrane-bounded organelle;membrane-bounded vesicle;organelle;vesicle		P29699	Alpha-2-HS-glycoprotein	Ahsg
6.8642	7.7767	7.7213	7.45407	0.10401	0.10307	0.10354	88.15	9.38	0.11	-3.23	22.7681	22.4154	21.2518	22.1451	26.3505	25.2645	24.8144	25.4764	25.0348	24.7032	24.869	21.9934	21.3415	21.6675	fat-soluble vitamin metabolic process;lipid metabolic process;metabolic process;primary metabolic process;small molecule metabolic process;steroid metabolic process;vitamin D metabolic process;vitamin metabolic process	actin binding;binding;cytoskeletal protein binding;protein binding;transmembrane transporter activity;transporter activity;vitamin transporter activity	blood microparticle;extracellular membrane-bounded organelle;extracellular organelle;extracellular region part;extracellular space;extracellular vesicular exosome;membrane-bounded organelle;membrane-bounded vesicle;organelle;vesicle		P21614	Vitamin D-binding protein	Gc
7.1454	7.8951	7.5407	7.52707	0.10832	0.11188	0.1101	88.26	9.92	0.11	-3.15	24.051	23.5374	23.0891	23.5592	27.2183	26.4727	26.5026	26.7312	27.4837	27.7734	27.6286	23.9649	22.8562	23.4105	biological regulation;blood coagulation;coagulation;hemostasis;multicellular organismal process;negative regulation of biological process;negative regulation of catalytic activity;negative regulation of defense response;negative regulation of endopeptidase activity;negative regulation of hydrolase activity;negative regulation of inflammatory response;negative regulation of molecular function;nega…	binding;carbohydrate binding;endopeptidase inhibitor activity;endopeptidase regulator activity;enzyme binding;enzyme inhibitor activity;enzyme regulator activity;glycosaminoglycan binding;heparin binding;pattern binding;peptidase inhibitor activity;peptidase regulator activity;polysaccharide binding;protease binding;protein binding;serine-type endopeptidase inhibitor activity	blood microparticle;extracellular membrane-bounded organelle;extracellular organelle;extracellular region part;extracellular space;extracellular vesicular exosome;membrane-bounded organelle;membrane-bounded vesicle;organelle;vesicle	Complement and coagulation cascades	P32261;A0A0A6YWH7	Antithrombin-III	Serpinc1
7.3648	7.8962	7.3996	7.55353	0.10187	0.10693	0.1044	88.3	9.45	0.11	-3.22	21.8148	22.4992	22.8939	22.4027	25.7425	26.3828	26.0661	26.0638	25.685	25.0089	25.347	22.3234	21.7947	22.0591	amine metabolic process;aminoglycan metabolic process;carbohydrate metabolic process;glycosaminoglycan metabolic process;hyaluronan metabolic process;macromolecule metabolic process;metabolic process;nitrogen compound metabolic process;polysaccharide metabolic process;primary metabolic process	endopeptidase inhibitor activity;endopeptidase regulator activity;enzyme inhibitor activity;enzyme regulator activity;peptidase inhibitor activity;peptidase regulator activity;serine-type endopeptidase inhibitor activity	blood microparticle;extracellular membrane-bounded organelle;extracellular organelle;extracellular region part;extracellular vesicular exosome;membrane-bounded organelle;membrane-bounded vesicle;organelle;vesicle		G3X977;Q61703;Q3UEG7	Inter-alpha-trypsin inhibitor heavy chain H2	Itih2
7.1841	8.4332	7.1078	7.57503	0.11591	0.12818	0.122045	88.31	10.86	0.12	-3.02	20.6222	21.3598	21.096	21.026	24.5082	25.1434	25.3373	24.9963	24.6907	24.4117	24.5512	20.5575	19.4633	20.0104	activation of immune response;biological regulation;cell death;cellular process;complement activation;complement activation, alternative pathway;complement activation, classical pathway;cytolysis;death;defense response;humoral immune response;immune effector process;immune response;immune system process;innate immune response;macromolecule metabolic process;metabolic process;positive regulation o…		blood microparticle;cell part;extracellular membrane-bounded organelle;extracellular organelle;extracellular region part;extracellular vesicular exosome;macromolecular complex;membrane attack complex;membrane part;membrane-bounded organelle;membrane-bounded vesicle;organelle;plasma membrane part;pore complex;protein complex;vesicle	Amoebiasis;Complement and coagulation cascades;Prion diseases;Systemic lupus erythematosus	Q8K182;A2A998;A2A997	Complement component C8 alpha chain	C8a
7.607	7.8095	7.2852	7.56723	0.12836	0.12581	0.127085	88.32	11.28	0.13	-2.97	28.4594	27.4344	26.737	27.5436	31.4045	30.3848	29.6626	30.484	30.314	28.9832	29.6486	27.3929	25.6376	26.5153	biological regulation;negative regulation of catalytic activity;negative regulation of endopeptidase activity;negative regulation of hydrolase activity;negative regulation of molecular function;negative regulation of peptidase activity;regulation of biological process;regulation of catalytic activity;regulation of endopeptidase activity;regulation of hydrolase activity;regulation of metabolic pro…	binding;endopeptidase inhibitor activity;endopeptidase regulator activity;enzyme binding;enzyme inhibitor activity;enzyme regulator activity;glycoprotein binding;identical protein binding;peptidase inhibitor activity;peptidase regulator activity;protease binding;protein binding;serine-type endopeptidase inhibitor activity	cell part;cytoplasmic part;endoplasmic reticulum;extracellular membrane-bounded organelle;extracellular organelle;extracellular region;extracellular region part;extracellular space;extracellular vesicular exosome;Golgi apparatus;intracellular membrane-bounded organelle;intracellular organelle;intracellular part;membrane-bounded organelle;membrane-bounded vesicle;organelle;vesicle	Complement and coagulation cascades	Q00896	Alpha-1-antitrypsin 1-3	Serpina1c
7.4834	7.9072	7.3245	7.5717	0.095582	0.10451	0.100046	88.33	9.09	0.1	-3.28	27.2787	26.7787	25.8395	26.6323	30.2469	29.7744	28.8196	29.6136	30.2106	29.4031	29.8069	26.033	26.6525	26.3428	acute inflammatory response;acute-phase response;biological regulation;carbohydrate metabolic process;cellular carbohydrate metabolic process;cellular macromolecule metabolic process;cellular metabolic process;cellular process;cellular protein metabolic process;defense response;glycosylation;inflammatory response;macromolecule glycosylation;macromolecule metabolic process;macromolecule modificati…	binding;endopeptidase inhibitor activity;endopeptidase regulator activity;enzyme binding;enzyme inhibitor activity;enzyme regulator activity;glycoprotein binding;identical protein binding;peptidase inhibitor activity;peptidase regulator activity;protease binding;protein binding;serine-type endopeptidase inhibitor activity	cell part;cytoplasmic part;endoplasmic reticulum;extracellular membrane-bounded organelle;extracellular organelle;extracellular region;extracellular region part;extracellular space;extracellular vesicular exosome;Golgi apparatus;intracellular membrane-bounded organelle;intracellular organelle;intracellular part;membrane-bounded organelle;membrane-bounded vesicle;organelle;vesicle	Complement and coagulation cascades	A0A0A0MQA3;P07758	Alpha-1-antitrypsin 1-1	Serpina1a
7.8048	7.8401	7.2146	7.61983	0.1105	0.10195	0.106225	88.39	9.6	0.11	-3.2	22.0142	22.4895	21.346	21.9499	25.2945	25.7915	25.0439	25.3766	24.8763	23.6678	24.2721	21.3832	20.2082	20.7957	activation of immune response;biological regulation;complement activation;complement activation, classical pathway;defense response;humoral immune response;immune effector process;immune response;immune system process;inflammatory response;innate immune response;macromolecule metabolic process;metabolic process;positive regulation of biological process;positive regulation of immune response;posit…	endopeptidase inhibitor activity;endopeptidase regulator activity;enzyme inhibitor activity;enzyme regulator activity;peptidase inhibitor activity;peptidase regulator activity	extracellular region part;extracellular space	Complement and coagulation cascades;Staphylococcus aureus infection;Systemic lupus erythematosus	P01029	Complement C4-B;Complement C4 beta chain;Complement C4 alpha chain;C4a anaphylatoxin;Complement C4 gamma chain	C4b
7.5552	7.5093	7.8364	7.63363	0.11678	0.10792	0.11235	88.42	10.09	0.11	-3.13	23.3377	23.2601	21.3721	22.6566	26.2592	26.1051	24.7986	25.7209	25.9666	25.9082	25.9374	22.9781	22.6236	22.8009	anatomical structure morphogenesis;biological regulation;cell activation;cell morphogenesis;cellular component assembly;cellular component assembly at cellular level;cellular component morphogenesis;cellular component organization;cellular component organization at cellular level;cellular component organization or biogenesis;cellular component organization or biogenesis at cellular level;cellular…	binding;enzyme binding;misfolded protein binding;protein binding;ubiquitin protein ligase binding	blood microparticle;cell part;chromaffin granule;cytoplasm;cytoplasmic membrane-bounded vesicle;cytoplasmic part;cytoplasmic vesicle;cytosol;endoplasmic reticulum;extracellular matrix;extracellular membrane-bounded organelle;extracellular organelle;extracellular region part;extracellular space;extracellular vesicular exosome;high-density lipoprotein particle;intracellular membrane-bounded organel…		Q06890;E9PUU2;E9PXG5;E9Q8Y5	Clusterin;Clusterin beta chain;Clusterin alpha chain	Clu
6.9956	8.0454	8.0048	7.68193	0.10814	0.11313	0.110635	88.46	9.96	0.11	-3.15	22.4355	22.7605	21.4031	22.1997	24.069	24.4808	23.2533	25.6368	25.3556	23.2789	25.1257	20.9747	21.1855	21.0801	amine metabolic process;aminoglycan metabolic process;carbohydrate metabolic process;glycosaminoglycan metabolic process;hyaluronan metabolic process;macromolecule metabolic process;metabolic process;nitrogen compound metabolic process;polysaccharide metabolic process;primary metabolic process	endopeptidase inhibitor activity;endopeptidase regulator activity;enzyme inhibitor activity;enzyme regulator activity;peptidase inhibitor activity;peptidase regulator activity;serine-type endopeptidase inhibitor activity	blood microparticle;cell part;cytoplasm;extracellular membrane-bounded organelle;extracellular organelle;extracellular region part;extracellular vesicular exosome;intracellular part;membrane;membrane-bounded organelle;membrane-bounded vesicle;organelle;plasma membrane;vesicle		E9PVD2	Inter alpha-trypsin inhibitor, heavy chain 4	Itih4
7.4332	7.9859	7.6817	7.70027	0.10489	0.10152	0.103205	88.5	9.35	0.11	-3.24	29.8744	29.3743	29.3993	29.5494	32.8066	32.3153	32.3346	32.4855	32.3508	32.8976	32.6242	29.0498	29.1677	29.1087	adrenal gland development;alcohol metabolic process;amine metabolic process;anatomical structure development;anatomical structure morphogenesis;biological regulation;biosynthetic process;blood vessel endothelial cell migration;C21-steroid hormone metabolic process;cell migration;cell motility;cell proliferation;cell surface receptor linked signaling pathway;cellular amine metabolic process;cellul…	alcohol binding;amine binding;apolipoprotein A-I receptor binding;apolipoprotein receptor binding;beta-amyloid binding;binding;cation binding;chemorepellent activity;cholesterol binding;cholesterol transporter activity;enzyme activator activity;enzyme binding;enzyme inhibitor activity;enzyme regulator activity;high-density lipoprotein particle binding;high-density lipoprotein particle receptor bi…	blood microparticle;cell part;cell surface;chylomicron;cytoplasmic membrane-bounded vesicle;cytoplasmic part;cytoplasmic vesicle;cytosol;discoidal high-density lipoprotein particle;endocytic vesicle;extracellular membrane-bounded organelle;extracellular organelle;extracellular region;extracellular region part;extracellular space;extracellular vesicular exosome;high-density lipoprotein particle;in…	African trypanosomiasis;Fat digestion and absorption;PPAR signaling pathway;Vitamin digestion and absorption	Q00623	Apolipoprotein A-I;Proapolipoprotein A-I;Truncated apolipoprotein A-I	Apoa1
6.9967	7.9349	8.2358	7.72247	0.10964	0.10589	0.107765	88.51	9.73	0.11	-3.19	23.0002	22.1576	21.7727	22.3101	25.9665	25.8186	25.2745	25.6865	25.2419	25.2263	25.2341	21.3987	21.544	21.4714	activation of immune response;biological regulation;cell proliferation;complement activation;complement activation, alternative pathway;defense response;humoral immune response;immune effector process;immune response;immune system process;innate immune response;macromolecule metabolic process;metabolic process;positive regulation of biological process;positive regulation of immune response;positi…	catalytic activity;endopeptidase activity;hydrolase activity;peptidase activity;peptidase activity, acting on L-amino acid peptides;serine hydrolase activity;serine-type endopeptidase activity;serine-type peptidase activity	blood microparticle;extracellular membrane-bounded organelle;extracellular organelle;extracellular region part;extracellular space;extracellular vesicular exosome;membrane-bounded organelle;membrane-bounded vesicle;organelle;vesicle	Complement and coagulation cascades;Staphylococcus aureus infection	B8JJN0;F6VQX8;B8JJM5;P04186;F6XQ00;B8JJM6	Complement factor B;Complement factor B Ba fragment;Complement factor B Bb fragment	Gm20547;Cfb
7.2056	8.1082	7.8961	7.73663	0.1065	0.10255	0.104525	88.54	9.46	0.11	-3.23	24.914	24.9078	23.8529	24.5583	27.9472	28.1376	27.1038	27.7295	27.5149	26.7405	27.1277	23.6783	22.9334	23.3059	activation of immune response;biological regulation;carboxylic acid metabolic process;cellular ketone metabolic process;cellular lipid metabolic process;cellular metabolic process;cellular process;complement activation;complement activation, alternative pathway;complement activation, classical pathway;defense response;fatty acid metabolic process;humoral immune response;immune effector process;im…	binding;C5a anaphylatoxin chemotactic receptor binding;C5L2 anaphylatoxin chemotactic receptor binding;endopeptidase inhibitor activity;endopeptidase regulator activity;enzyme inhibitor activity;enzyme regulator activity;G-protein-coupled receptor binding;peptidase inhibitor activity;peptidase regulator activity;protein binding;receptor binding	blood microparticle;extracellular membrane-bounded organelle;extracellular organelle;extracellular region part;extracellular space;extracellular vesicular exosome;membrane-bounded organelle;membrane-bounded vesicle;organelle;vesicle	Chagas disease (American trypanosomiasis);Complement and coagulation cascades;ko05152;Leishmaniasis;Phagosome;Staphylococcus aureus infection;Systemic lupus erythematosus	P01027	Complement C3;Complement C3 beta chain;C3-beta-c;Complement C3 alpha chain;C3a anaphylatoxin;Acylation stimulating protein;Complement C3b alpha chain;Complement C3c alpha chain fragment 1;Complement C3dg fragment;Complement C3g fragment;Complement C3d fragment;Complement C3f fragment;Complement C3c alpha chain fragment 2	C3
7.5136	8.0598	7.7593	7.77757	0.1054	0.10724	0.10632	88.6	9.61	0.11	-3.2	23.1286	22.8341	23.1518	23.0381	26.0429	26.0218	26.135	26.0666	25.3852	25.4154	25.4003	21.6305	22.0739	21.8522	anatomical structure development;anatomical structure homeostasis;anatomical structure morphogenesis;biological regulation;blood coagulation;blood vessel development;cell differentiation;cell differentiation involved in embryonic placenta development;cell migration;cell motility;cellular component disassembly;cellular component disassembly at cellular level;cellular component movement;cellular co…	apolipoprotein binding;binding;catalytic activity;endopeptidase activity;hydrolase activity;peptidase activity;peptidase activity, acting on L-amino acid peptides;protein binding;protein domain specific binding;receptor binding;serine hydrolase activity;serine-type endopeptidase activity;serine-type peptidase activity	blood microparticle;cell part;cell surface;extracellular membrane-bounded organelle;extracellular organelle;extracellular region;extracellular region part;extracellular space;extracellular vesicular exosome;extrinsic to external side of plasma membrane;extrinsic to membrane;extrinsic to plasma membrane;intracellular membrane-bounded organelle;intracellular organelle;intracellular part;macromolecu…	Complement and coagulation cascades;Neuroactive ligand-receptor interaction;Staphylococcus aureus infection	P20918	Plasminogen;Plasmin heavy chain A;Activation peptide;Angiostatin;Plasmin heavy chain A, short form;Plasmin light chain B	Plg
7.884	7.8753	7.5749	7.77807	0.035119	0.10907	0.0720945	88.61	5.83	0.07	-3.93	21.755	22.1696	19.7957	21.2401	25.495	25.8276	23.7955	25.0394	25.7308	21.1431	23.437	20.3722	19.2267	19.7995	biological regulation;carbohydrate metabolic process;cellular carbohydrate metabolic process;cellular macromolecule metabolic process;cellular metabolic process;cellular process;cellular protein metabolic process;glycosylation;macromolecule glycosylation;macromolecule metabolic process;macromolecule modification;metabolic process;negative regulation of catalytic activity;negative regulation of en…	binding;endopeptidase inhibitor activity;endopeptidase regulator activity;enzyme binding;enzyme inhibitor activity;enzyme regulator activity;glycoprotein binding;identical protein binding;peptidase inhibitor activity;peptidase regulator activity;protease binding;protein binding;serine-type endopeptidase inhibitor activity	cell part;cytoplasmic part;endoplasmic reticulum;extracellular membrane-bounded organelle;extracellular organelle;extracellular region;extracellular region part;extracellular space;extracellular vesicular exosome;Golgi apparatus;intracellular membrane-bounded organelle;intracellular organelle;intracellular part;membrane-bounded organelle;membrane-bounded vesicle;organelle;vesicle	Complement and coagulation cascades	Q00898	Alpha-1-antitrypsin 1-5	Serpina1e
7.1633	8.44	7.7808	7.7947	0.12677	0.06324	0.095005	88.61	4.93	0.06	-4.17	20.8857	19.7174	18.4238	19.6756	24.0074	23.7408	21.826	23.1914	24.1136	22.4022	23.2579	19.1143	NaN	NaN	biological regulation;blood coagulation;coagulation;hemostasis;multicellular organismal process;negative regulation of catalytic activity;negative regulation of endopeptidase activity;negative regulation of hydrolase activity;negative regulation of molecular function;negative regulation of peptidase activity;regulation of biological process;regulation of biological quality;regulation of body flui…	binding;carbohydrate binding;endopeptidase inhibitor activity;endopeptidase regulator activity;enzyme inhibitor activity;enzyme regulator activity;glycosaminoglycan binding;heparin binding;pattern binding;peptidase inhibitor activity;peptidase regulator activity;polysaccharide binding;serine-type endopeptidase inhibitor activity	extracellular membrane-bounded organelle;extracellular organelle;extracellular region part;extracellular space;extracellular vesicular exosome;membrane-bounded organelle;membrane-bounded vesicle;organelle;vesicle		Q8R121	Protein Z-dependent protease inhibitor	Serpina10
7.0713	8.5383	7.8497	7.81977	0.10832	0.097586	0.102953	88.63	9.32	0.11	-3.25	20.3938	20.2833	18.9106	19.8626	23.749	24.0362	22.9659	23.5837	23.6249	22.6509	23.1379	20.3996	19.9451	20.1723	biological regulation;blood coagulation;coagulation;hemostasis;multicellular organismal process;negative regulation of catalytic activity;negative regulation of endopeptidase activity;negative regulation of hydrolase activity;negative regulation of molecular function;negative regulation of peptidase activity;regulation of biological process;regulation of biological quality;regulation of body flui…	binding;carbohydrate binding;endopeptidase inhibitor activity;endopeptidase regulator activity;enzyme inhibitor activity;enzyme regulator activity;glycosaminoglycan binding;heparin binding;pattern binding;peptidase inhibitor activity;peptidase regulator activity;polysaccharide binding;serine-type endopeptidase inhibitor activity	extracellular membrane-bounded organelle;extracellular organelle;extracellular region part;extracellular space;extracellular vesicular exosome;membrane-bounded organelle;membrane-bounded vesicle;organelle;vesicle	Complement and coagulation cascades	P49182	Heparin cofactor 2	Serpind1
7.612	8.2101	7.6176	7.81323	0.1064	0.10534	0.10587	88.65	9.57	0.11	-3.21	22.5168	23.0443	21.2196	22.2602	25.6045	26.3037	24.883	25.5971	25.579	25.0435	25.3113	20.9446	21.6613	21.303	amine metabolic process;aminoglycan metabolic process;carbohydrate metabolic process;glycosaminoglycan metabolic process;hyaluronan metabolic process;macromolecule metabolic process;metabolic process;nitrogen compound metabolic process;polysaccharide metabolic process;primary metabolic process	endopeptidase inhibitor activity;endopeptidase regulator activity;enzyme inhibitor activity;enzyme regulator activity;peptidase inhibitor activity;peptidase regulator activity;serine-type endopeptidase inhibitor activity	blood microparticle;extracellular membrane-bounded organelle;extracellular organelle;extracellular region part;extracellular vesicular exosome;membrane-bounded organelle;membrane-bounded vesicle;organelle;vesicle		Q61702;F8WJ05	Inter-alpha-trypsin inhibitor heavy chain H1	Itih1
6.7704	8.4111	8.3842	7.85523	0.098134	0.06324	0.080687	88.66	4.93	0.06	-4.17	18.9432	17.6717	19.3181	18.6443	22.0935	21.4406	23.3547	22.2963	23.7013	20.5922	22.1468	17.3638	NaN	NaN	acylglycerol metabolic process;biological regulation;blood coagulation, intrinsic pathway;cellular lipid metabolic process;cellular metabolic process;cellular process;glycerol ether metabolic process;glycerolipid metabolic process;lipid metabolic process;macromolecule metabolic process;metabolic process;negative regulation of angiogenesis;negative regulation of apoptosis;negative regulation of bi…	binding;carbohydrate binding;enzyme activator activity;enzyme regulator activity;glycoprotein binding;glycosaminoglycan binding;heparin binding;identical protein binding;lipase activator activity;lipid binding;lipoprotein lipase activator activity;pattern binding;phospholipid binding;polysaccharide binding;protein binding	cell part;cell surface;chylomicron;extracellular matrix;extracellular membrane-bounded organelle;extracellular organelle;extracellular region part;extracellular space;extracellular vesicular exosome;high-density lipoprotein particle;macromolecular complex;membrane-bounded organelle;membrane-bounded vesicle;organelle;plasma lipoprotein particle;protein-lipid complex;triglyceride-rich lipoprotein p…		Q01339	Beta-2-glycoprotein 1	Apoh
7.5692	8.34	7.6996	7.8696	0.1204	0.098233	0.109316	88.72	9.81	0.11	-3.18	23.0681	22.863	22.8413	22.9242	25.2866	26.0057	25.7867	25.693	25.738	25.1516	25.4448	22.5482	22.8245	22.6864	anatomical structure homeostasis;antigen processing and presentation;antigen processing and presentation of exogenous antigen;antigen processing and presentation of exogenous peptide antigen;antigen processing and presentation of exogenous peptide antigen via MHC class Ib;antigen processing and presentation of exogenous protein antigen via MHC class Ib, TAP-dependent;antigen processing and presen…	binding;identical protein binding;protein binding	adherens junction;anchoring junction;cell junction;cell part;cell-substrate adherens junction;cell-substrate junction;cytoplasm;cytoplasmic part;cytoplasmic vesicle membrane;cytoplasmic vesicle part;endocytic vesicle membrane;external side of plasma membrane;extracellular membrane-bounded organelle;extracellular organelle;extracellular region part;extracellular space;extracellular vesicular exoso…	Antigen processing and presentation	P01887	Beta-2-microglobulin	B2m
7.7934	7.9355	7.9457	7.89153	0.096532	0.098409	0.0974705	88.75	8.88	0.1	-3.32	21.9245	22.6937	21.5961	22.0715	25.7156	25.1298	25.8888	25.5781	24.956	25.1273	25.0416	20.8206	21.6306	21.2256	biological regulation;cellular component assembly;cellular component organization;cellular component organization or biogenesis;cellular macromolecule metabolic process;cellular metabolic process;cellular process;cholesterol efflux;cholesterol transport;establishment of localization;high-density lipoprotein particle assembly;high-density lipoprotein particle clearance;high-density lipoprotein par…	antioxidant activity;binding;lipid binding;lipid transporter activity;phospholipid binding;substrate-specific transporter activity;transporter activity	discoidal high-density lipoprotein particle;extracellular membrane-bounded organelle;extracellular organelle;extracellular region;extracellular region part;extracellular vesicular exosome;high-density lipoprotein particle;low-density lipoprotein particle;macromolecular complex;membrane-bounded organelle;membrane-bounded vesicle;organelle;plasma lipoprotein particle;protein-lipid complex;spherical…		Q9Z1R3	Apolipoprotein M	Apom
7.7026	7.6154	8.4357	7.9179	0.10561	0.094264	0.099937	88.78	9.07	0.1	-3.29	23.621	23.2839	13.7058	20.2036	26.5785	26.1834	28.5383	27.1001	26.2159	27.8121	27.014	23.0819	17.3093	20.1956	biological regulation;negative regulation of catalytic activity;negative regulation of endopeptidase activity;negative regulation of hydrolase activity;negative regulation of molecular function;negative regulation of peptidase activity;regulation of biological process;regulation of catalytic activity;regulation of endopeptidase activity;regulation of hydrolase activity;regulation of metabolic pro…	endopeptidase inhibitor activity;endopeptidase regulator activity;enzyme inhibitor activity;enzyme regulator activity;peptidase inhibitor activity;peptidase regulator activity;serine-type endopeptidase inhibitor activity	blood microparticle;extracellular membrane-bounded organelle;extracellular organelle;extracellular region part;extracellular space;extracellular vesicular exosome;membrane-bounded organelle;membrane-bounded vesicle;organelle;vesicle		Q03734	Serine protease inhibitor A3M	Serpina3m
7.0702	8.4527	8.2908	7.9379	0.12953	0.12584	0.127685	88.78	11.32	0.13	-2.97	24.9118	23.2555	24.1193	24.0955	27.443	26.6237	27.1479	27.0715	27.7089	28.5269	28.1179	24.7976	25.6414	25.2195	acylglycerol catabolic process;acylglycerol metabolic process;alcohol metabolic process;biological regulation;carbohydrate homeostasis;catabolic process;cell surface receptor linked signaling pathway;cellular catabolic process;cellular chemical homeostasis;cellular component organization;cellular component organization or biogenesis;cellular glucose homeostasis;cellular homeostasis;cellular lipid…	binding;enzyme inhibitor activity;enzyme regulator activity;lipase inhibitor activity;lipid binding;phospholipid binding	cell part;chylomicron;cytoplasmic part;cytosol;extracellular membrane-bounded organelle;extracellular organelle;extracellular region;extracellular region part;extracellular vesicular exosome;high-density lipoprotein particle;intermediate-density lipoprotein particle;intracellular part;macromolecular complex;membrane-bounded organelle;membrane-bounded vesicle;organelle;plasma lipoprotein particle;…	PPAR signaling pathway	E9QP56;P33622	Apolipoprotein C-III	Apoc3
7.2728	8.2231	8.2964	7.93077	0.10724	0.10058	0.10391	88.79	9.41	0.11	-3.24	21.6277	21.7075	22.0323	21.7892	24.9043	24.9244	25.2864	25.0384	24.9485	24.3486	24.6486	20.782	20.7636	20.7728		enzyme inhibitor activity;enzyme regulator activity	extracellular region;extracellular region part;extracellular space		Q9DBD0;D3YY36	Inhibitor of carbonic anhydrase	Ica;1300017J02Rik
7.4575	8.3825	7.973	7.93767	0.097399	0.10495	0.101175	88.8	9.18	0.1	-3.27	22.0603	22.3606	21.1694	21.8635	25.5073	25.7039	24.8843	25.3652	24.3243	24.5788	24.4516	21.6324	21.8195	21.726	anatomical structure formation involved in morphogenesis;angiogenesis;biological regulation;cell activation;cellular process;cellular response to chemical stimulus;cellular response to inorganic substance;cellular response to iron ion;cellular response to metal ion;cellular response to stimulus;chemotaxis;cofactor transport;defense response;defense response to fungus;developmental process;establi…	binding;carbohydrate binding;cation binding;cysteine-type endopeptidase inhibitor activity;endopeptidase inhibitor activity;endopeptidase regulator activity;enzyme inhibitor activity;enzyme regulator activity;glycoprotein binding;glycosaminoglycan binding;heme binding;heparan sulfate proteoglycan binding;heparin binding;immunoglobulin binding;ion binding;iron ion binding;metal ion binding;pattern…	blood microparticle;extracellular membrane-bounded organelle;extracellular organelle;extracellular region part;extracellular vesicular exosome;membrane-bounded organelle;membrane-bounded vesicle;organelle;vesicle		Q9ESB3	Histidine-rich glycoprotein	Hrg
7.4922	8.4714	7.9257	7.9631	0.11838	0.099432	0.108906	88.83	9.79	0.11	-3.18	25.8957	26.3925	27.3619	26.55	28.8487	29.4833	30.4324	29.5881	29.6481	30.7934	30.2207	26.6587	27.4339	27.0463	acylglycerol metabolic process;alcohol metabolic process;biological regulation;cellular component organization;cellular component organization or biogenesis;cellular lipid metabolic process;cellular macromolecule metabolic process;cellular metabolic process;cellular process;cholesterol efflux;cholesterol metabolic process;cholesterol transport;chylomicron remnant clearance;establishment of locali…	binding;carboxylic acid binding;enzyme inhibitor activity;enzyme regulator activity;fatty acid binding;lipase inhibitor activity;lipid binding;monocarboxylic acid binding;phospholipase inhibitor activity	cell part;cytoplasmic part;endoplasmic reticulum;extracellular membrane-bounded organelle;extracellular organelle;extracellular region part;extracellular vesicular exosome;high-density lipoprotein particle;intracellular membrane-bounded organelle;intracellular organelle;intracellular part;macromolecular complex;membrane-bounded organelle;membrane-bounded vesicle;organelle;plasma lipoprotein parti…		P34928	Apolipoprotein C-I;Truncated apolipoprotein C-I	Apoc1
7.8583	8.5326	7.5068	7.9659	0.14275	0.11144	0.127095	88.83	11.2	0.13	-2.99	21.9943	23.1131	21.737	22.2815	25.3373	26.1886	25.1934	25.5731	23.4541	23.4881	23.4711	18.788	21.0513	19.9197	amine metabolic process;aminoglycan metabolic process;carbohydrate metabolic process;glycosaminoglycan metabolic process;hyaluronan metabolic process;macromolecule metabolic process;metabolic process;nitrogen compound metabolic process;polysaccharide metabolic process;primary metabolic process	endopeptidase inhibitor activity;endopeptidase regulator activity;enzyme inhibitor activity;enzyme regulator activity;peptidase inhibitor activity;peptidase regulator activity;serine-type endopeptidase inhibitor activity	extracellular membrane-bounded organelle;extracellular organelle;extracellular region part;extracellular vesicular exosome;membrane-bounded organelle;membrane-bounded vesicle;organelle;vesicle		Q61704;E9PVS1	Inter-alpha-trypsin inhibitor heavy chain H3	Itih3
7.857	8.0506	7.9646	7.9574	0.11135	0.10024	0.105795	88.84	9.56	0.11	-3.22	23.483	23.269	23.0012	23.2511	26.3598	26.5633	26.2592	26.3941	26.8856	26.2295	26.5576	24.09	22.796	23.443	acute inflammatory response;acute-phase response;biological regulation;calcium ion homeostasis;cation homeostasis;cell activation;cell surface receptor linked signaling pathway;cellular calcium ion homeostasis;cellular cation homeostasis;cellular chemical homeostasis;cellular divalent inorganic cation homeostasis;cellular homeostasis;cellular ion homeostasis;cellular metal ion homeostasis;cellula…	binding;calcium ion binding;catalytic activity;cation binding;endopeptidase activity;hydrolase activity;ion binding;metal ion binding;molecular transducer activity;peptidase activity;peptidase activity, acting on L-amino acid peptides;protein binding;receptor activity;receptor binding;serine hydrolase activity;serine-type endopeptidase activity;serine-type peptidase activity;signal transducer act…	blood microparticle;extracellular membrane-bounded organelle;extracellular organelle;extracellular region part;extracellular space;extracellular vesicular exosome;membrane-bounded organelle;membrane-bounded vesicle;organelle;vesicle	Complement and coagulation cascades;Neuroactive ligand-receptor interaction;Regulation of actin cytoskeleton	P19221;H7BX99	Prothrombin;Activation peptide fragment 1;Activation peptide fragment 2;Thrombin light chain;Thrombin heavy chain;Prothrombin	F2
8.3646	7.6526	NaN	8.0086	0.10488	0.096186	0.100533	88.89	9.13	0.1	-3.28	21.9277	21.0303	NaN	21.479	24.9462	24.2507	19.3114	22.8361	24.5641	22.1911	23.3776	20.9246	19.3159	20.1202	anatomical structure development;antigen processing and presentation;antigen processing and presentation of endogenous antigen;antigen processing and presentation of endogenous peptide antigen;antigen processing and presentation of endogenous peptide antigen via MHC class I;antigen processing and presentation of endogenous peptide antigen via MHC class I via ER pathway;antigen processing and pres…	antigen binding;beta-2-microglobulin binding;binding;peptide antigen binding;peptide binding;protein binding;protein complex binding;receptor binding;T cell receptor binding;TAP binding	cell part;cell surface;cytoplasm;cytoplasmic part;cytoplasmic vesicle membrane;cytoplasmic vesicle part;endocytic vesicle membrane;endoplasmic reticulum;endoplasmic reticulum exit site;endoplasmic reticulum part;external side of plasma membrane;extracellular membrane-bounded organelle;extracellular organelle;extracellular region part;extracellular vesicular exosome;Golgi apparatus;Golgi apparatus…	Allograft rejection;Antigen processing and presentation;Autoimmune thyroid disease;Cell adhesion molecules (CAMs);Endocytosis;Graft-versus-host disease;Natural killer cell mediated cytotoxicity;Phagosome;Type I diabetes mellitus;Viral myocarditis	P01898	H-2 class I histocompatibility antigen, Q10 alpha chain	H2-Q10
7.1569	8.9472	NaN	8.05205	0.086032	0.24332	0.164676	88.89	12.64	0.14	-2.81	19.0096	19.665	NaN	19.3373	22.9674	22.7523	20.928	22.2159	21.9453	19.2947	20.62	15.8311	17.3767	16.6039	biological regulation;cell redox homeostasis;cellular homeostasis;cellular macromolecule metabolic process;cellular metabolic process;cellular process;cellular protein metabolic process;homeostatic process;macromolecule metabolic process;metabolic process;negative regulation of autophagy;negative regulation of biological process;negative regulation of catabolic process;negative regulation of cell…	catalytic activity;flavin-linked sulfhydryl oxidase activity;intramolecular oxidoreductase activity;intramolecular oxidoreductase activity, interconverting keto- and enol-groups;intramolecular oxidoreductase activity, transposing S-S bonds;isomerase activity;oxidoreductase activity;oxidoreductase activity, acting on a sulfur group of donors;oxidoreductase activity, acting on a sulfur group of don…	cell part;cytoplasmic part;endoplasmic reticulum;extracellular membrane-bounded organelle;extracellular organelle;extracellular region part;extracellular space;extracellular vesicular exosome;Golgi apparatus;Golgi apparatus part;integral to Golgi membrane;integral to membrane;integral to organelle membrane;intercellular bridge;intracellular membrane-bounded organelle;intracellular organelle;intra…		Q8BND5	Sulfhydryl oxidase 1	Qsox1
7.3792	8.4999	8.2319	8.037	0.11325	0.11838	0.115815	88.92	10.38	0.12	-3.1	23.4768	23.2663	21.9402	22.8944	26.5078	26.2941	25.1971	25.9997	26.1441	25.2359	25.69	22.8703	21.5265	22.1984	activation of immune response;aging;biological regulation;blood coagulation;coagulation;complement activation;complement activation, classical pathway;defense response;developmental process;fibrinolysis;hemostasis;humoral immune response;immune effector process;immune response;immune system process;innate immune response;macromolecule metabolic process;metabolic process;multicellular organismal p…	endopeptidase inhibitor activity;endopeptidase regulator activity;enzyme inhibitor activity;enzyme regulator activity;peptidase inhibitor activity;peptidase regulator activity;serine-type endopeptidase inhibitor activity	blood microparticle;extracellular membrane-bounded organelle;extracellular organelle;extracellular region part;extracellular space;extracellular vesicular exosome;membrane-bounded organelle;membrane-bounded vesicle;organelle;vesicle	Complement and coagulation cascades	P97290;A2ATR8	Plasma protease C1 inhibitor	Serping1
7.3818	10.23	7.2894	8.3004	0.10091	0.076594	0.088752	89.13	8.08	0.09	-3.46	19.414	18.7394	19.065	19.0728	21.9626	22.0586	22.0497	22.0236	22.1162	18.8893	20.5028	16.4773	15.2082	15.8427	biological regulation;cell surface receptor linked signaling pathway;cellular process;cellular response to chemical stimulus;cellular response to cytokine stimulus;cellular response to organic substance;cellular response to stimulus;cytokine biosynthetic process;cytokine metabolic process;cytokine-mediated signaling pathway;defense response;immune response;immune system process;inflammatory respo…	binding;cytokine binding;cytokine receptor activity;growth factor binding;interleukin-1 binding;interleukin-1 receptor activity;molecular transducer activity;protein binding;receptor activity;signal transducer activity;signaling receptor activity;transmembrane signaling receptor activity	cell part;extracellular region;integral to membrane;intrinsic to membrane;membrane;membrane part;plasma membrane	Apoptosis;Cytokine-cytokine receptor interaction	E9Q6I2;Q3UVZ1;Q61730;G3UY13	Interleukin-1 receptor accessory protein	Il1rap
7.7504	8.1378	8.8224	8.23687	0.11668	0.11098	0.11383	89.16	10.22	0.11	-3.13	21.482	21.7575	19.6541	20.9645	24.8102	25.0538	24.5285	24.7975	24.2188	23.7452	23.982	20.799	20.4962	20.6476	activation of immune response;biological regulation;cell death;cellular process;complement activation;complement activation, alternative pathway;complement activation, classical pathway;cytolysis;death;defense response;humoral immune response;immune effector process;immune response;immune system process;innate immune response;macromolecule metabolic process;metabolic process;positive regulation o…		blood microparticle;cell part;cytoplasm;extracellular membrane-bounded organelle;extracellular organelle;extracellular region part;extracellular vesicular exosome;intracellular part;macromolecular complex;membrane;membrane attack complex;membrane part;membrane-bounded organelle;membrane-bounded vesicle;organelle;plasma membrane;plasma membrane part;pore complex;protein complex;vesicle	Amoebiasis;Complement and coagulation cascades;Prion diseases;Systemic lupus erythematosus	P06683	Complement component C9	C9
6.3594	NaN	10.707	8.5332	0.13394	0.091572	0.112756	89.19	9.97	0.11	-3.16	16.7083	NaN	17.6238	17.1661	22.844	19.281	20.8985	21.0079	20.5961	20.0379	20.317	15.975	16.2972	16.1361		catalytic activity;endopeptidase activity;hydrolase activity;peptidase activity;peptidase activity, acting on L-amino acid peptides;serine hydrolase activity;serine-type endopeptidase activity;serine-type peptidase activity	cell part;cytoplasm;cytoplasmic part;endoplasmic reticulum;extracellular region part;extracellular space;intracellular membrane-bounded organelle;intracellular organelle;intracellular part;membrane-bounded organelle;organelle;rough endoplasmic reticulum		Q9R098	Hepatocyte growth factor activator;Hepatocyte growth factor activator short chain;Hepatocyte growth factor activator long chain	Hgfac
6.6508	9.4934	8.9348	8.35967	0.10421	0.11376	0.108985	89.2	9.82	0.11	-3.18	21.3655	18.3709	20.5399	20.0921	24.4615	24.1504	24.3612	24.3243	25.0508	24.6966	24.8737	18.3921	20.9763	19.6842	anatomical structure development;behavior;brain development;cellular metabolic process;cellular process;developmental process;growth;locomotory behavior;metabolic process;organ development;post-embryonic development;reproduction;response to stimulus;selenium compound metabolic process;sexual reproduction	binding;selenium binding	extracellular membrane-bounded organelle;extracellular organelle;extracellular region;extracellular region part;extracellular space;extracellular vesicular exosome;membrane-bounded organelle;membrane-bounded vesicle;organelle;vesicle		P70274;E0CZC5	Selenoprotein P	Sepp1
8.086	8.5626	NaN	8.3243	0.10132	0.11144	0.10638	89.27	9.61	0.11	-3.22	18.657	17.3203	NaN	17.9886	21.968	22.1995	22.4392	22.2022	23.7411	22.4816	23.1113	18.2537	17.9997	18.1267	biological regulation;blood coagulation;coagulation;hemostasis;multicellular organismal process;regulation of biological quality;regulation of body fluid levels	binding;calcium ion binding;catalytic activity;cation binding;endopeptidase activity;hydrolase activity;ion binding;metal ion binding;peptidase activity;peptidase activity, acting on L-amino acid peptides;serine hydrolase activity;serine-type endopeptidase activity;serine-type peptidase activity	extracellular membrane-bounded organelle;extracellular organelle;extracellular region;extracellular region part;extracellular vesicular exosome;membrane-bounded organelle;membrane-bounded vesicle;organelle;vesicle		Q9CQW3	Vitamin K-dependent protein Z	Proz
8.5128	8.3526	NaN	8.4327	0.02511	0.06324	0.044175	89.4	4.93	0.06	-4.18	9.6032	9.94143	NaN	9.77231	19.5365	20.7175	19.7157	19.9899	20.4578	16.7954	18.6266	NaN	NaN	NaN	biological regulation;cell surface receptor linked signaling pathway;cellular process;cellular response to chemical stimulus;cellular response to cytokine stimulus;cellular response to organic substance;cellular response to stimulus;ciliary neurotrophic factor-mediated signaling pathway;cytokine-mediated signaling pathway;enzyme linked receptor protein signaling pathway;leukemia inhibitory factor…	binding;ciliary neurotrophic factor receptor activity;ciliary neurotrophic factor receptor binding;cytokine binding;cytokine receptor activity;cytokine receptor binding;growth factor binding;leukemia inhibitory factor receptor activity;molecular transducer activity;oncostatin-M receptor activity;protein binding;receptor activity;receptor binding;signal transducer activity;signaling receptor activ…	cell part;extracellular membrane-bounded organelle;extracellular organelle;extracellular region part;extracellular vesicular exosome;integral to membrane;intrinsic to membrane;macromolecular complex;membrane;membrane part;membrane-bounded organelle;membrane-bounded vesicle;organelle;plasma membrane;protein complex;receptor complex;vesicle	Cytokine-cytokine receptor interaction;Jak-STAT signaling pathway	P42703	Leukemia inhibitory factor receptor	Lifr
7.6422	9.6638	8.1863	8.49743	0.20138	0.11854	0.15996	89.42	13.38	0.15	-2.74	20.3114	20.1989	19.6064	20.0389	24.358	22.8933	24.8688	24.04	23.8378	24.0054	23.9216	21.1004	21.2669	21.1836	alcohol biosynthetic process;alcohol metabolic process;anatomical structure development;anatomical structure formation involved in morphogenesis;anatomical structure homeostasis;anatomical structure morphogenesis;apocarotenoid metabolic process;biological regulation;biosynthetic process;carbohydrate biosynthetic process;carbohydrate homeostasis;carbohydrate metabolic process;cardiac muscle tissue…	binding;isoprenoid binding;lipid binding;retinal binding;retinoid binding;retinol binding;retinol transporter activity;transmembrane transporter activity;transporter activity;vitamin binding;vitamin transporter activity	extracellular membrane-bounded organelle;extracellular organelle;extracellular region part;extracellular space;extracellular vesicular exosome;macromolecular complex;membrane-bounded organelle;membrane-bounded vesicle;organelle;protein complex;vesicle		H7BWY6;Q00724	Retinol-binding protein 4	Rbp4
8.0605	9.7857	7.9574	8.6012	0.11616	0.11547	0.115815	89.54	10.38	0.12	-3.11	25.8144	23.7002	24.7356	24.7501	26.4025	25.3235	27.0384	26.2548	28.4777	30.1424	29.31	24.7731	24.2235	24.4983	acute inflammatory response;acylglycerol catabolic process;acylglycerol metabolic process;alcohol metabolic process;amine metabolic process;anatomical structure morphogenesis;beta-glucoside transport;biological regulation;biosynthetic process;carbohydrate transport;carboxylic acid metabolic process;catabolic process;cellular amine metabolic process;cellular biogenic amine metabolic process;cellul…	alcohol binding;amine binding;apolipoprotein receptor binding;binding;cation binding;cholesterol binding;cholesterol transporter activity;enzyme activator activity;enzyme inhibitor activity;enzyme regulator activity;high-density lipoprotein particle binding;high-density lipoprotein particle receptor binding;identical protein binding;ion binding;lipase inhibitor activity;lipid binding;lipid transp…	blood microparticle;cell part;chylomicron;cytoplasmic part;cytosol;extracellular membrane-bounded organelle;extracellular organelle;extracellular region;extracellular region part;extracellular space;extracellular vesicular exosome;high-density lipoprotein particle;intracellular part;macromolecular complex;membrane-bounded organelle;membrane-bounded vesicle;organelle;plasma lipoprotein particle;pr…	PPAR signaling pathway	P09813	Apolipoprotein A-II;Proapolipoprotein A-II	Apoa2
7.7387	10.29	7.9066	8.6451	0.1157	0.06324	0.08947	89.55	4.93	0.06	-4.18	18.8473	18.501	18.1664	18.5049	22.6796	22.4747	21.6852	22.2799	21.8479	22.1071	21.9775	18.4398	NaN	NaN	alcohol metabolic process;amine metabolic process;biological regulation;biosynthetic process;cellular amine metabolic process;cellular biogenic amine metabolic process;cellular biosynthetic process;cellular component organization;cellular component organization or biogenesis;cellular lipid metabolic process;cellular macromolecule biosynthetic process;cellular macromolecule metabolic process;cellu…	apolipoprotein A-I binding;apolipoprotein binding;binding;catalytic activity;O-acyltransferase activity;phosphatidylcholine-sterol O-acyltransferase activity;protein binding;transferase activity;transferase activity, transferring acyl groups;transferase activity, transferring acyl groups other than amino-acyl groups	extracellular membrane-bounded organelle;extracellular organelle;extracellular region part;extracellular space;extracellular vesicular exosome;high-density lipoprotein particle;macromolecular complex;membrane-bounded organelle;membrane-bounded vesicle;organelle;plasma lipoprotein particle;protein-lipid complex;vesicle	Glycerophospholipid metabolism	P16301	Phosphatidylcholine-sterol acyltransferase	Lcat
NaN	9.2078	8.1203	8.66405	0.02511	0.10756	0.066335	89.63	4.93	0.06	-4.18	NaN	18.1075	18.9024	18.505	21.7969	21.3917	21.7731	21.6539	21.9923	21.8979	21.9451	NaN	18.4095	NaN	activation of immune response;activation of innate immune response;amine metabolic process;aminoglycan catabolic process;aminoglycan metabolic process;biological regulation;carbohydrate catabolic process;carbohydrate metabolic process;catabolic process;cellular process;cellular response to stimulus;defense response;defense response to bacterium;defense response to Gram-positive bacterium;detectio…	binding;carbohydrate binding;catalytic activity;cation binding;glycosaminoglycan binding;hydrolase activity;hydrolase activity, acting on carbon-nitrogen (but not peptide) bonds;hydrolase activity, acting on carbon-nitrogen (but not peptide) bonds, in linear amides;ion binding;metal ion binding;molecular transducer activity;N-acetylmuramoyl-L-alanine amidase activity;pattern binding;pattern recog…	cell part;extracellular membrane-bounded organelle;extracellular organelle;extracellular region part;extracellular vesicular exosome;membrane;membrane-bounded organelle;membrane-bounded vesicle;organelle;vesicle		Q8VCS0	N-acetylmuramoyl-L-alanine amidase	Pglyrp2
8.0862	9.3076	NaN	8.6969	0.1439	0.10931	0.126605	89.66	11.14	0.12	-3.01	14.9779	16.1404	NaN	15.5591	17.8199	18.0807	NaN	17.9503	18.2754	16.966	17.6207	15.4816	13.7533	14.6175	cellular component movement;cellular process;microtubule-based movement;microtubule-based process	adenyl nucleotide binding;adenyl ribonucleotide binding;ATP binding;ATPase activity;binding;catalytic activity;hydrolase activity;hydrolase activity, acting on acid anhydrides;hydrolase activity, acting on acid anhydrides, in phosphorus-containing anhydrides;microtubule motor activity;motor activity;nucleoside-triphosphatase activity;nucleotide binding;purine nucleotide binding;purine ribonucleos…	cell part;cytoskeletal part;intracellular organelle part;intracellular part;macromolecular complex;microtubule;organelle part;protein complex	Huntington's disease	D3Z667;P0C6F1	Dynein heavy chain 2, axonemal	Dnah2
9.9175	8.8795	7.7324	8.84313	0.16786	0.12698	0.14742	89.79	12.74	0.14	-2.82	20.0893	19.8376	19.5835	19.8368	23.887	23.1664	22.8653	23.3062	22.1042	22.4974	22.3008	18.7281	19.2816	19.0049	activation of immune response;biological regulation;complement activation;complement activation, classical pathway;defense response;humoral immune response;immune effector process;immune response;immune system process;innate immune response;macromolecule metabolic process;metabolic process;positive regulation of biological process;positive regulation of immune response;positive regulation of immu…	binding;calcium ion binding;catalytic activity;cation binding;endopeptidase activity;hydrolase activity;identical protein binding;ion binding;metal ion binding;peptidase activity;peptidase activity, acting on L-amino acid peptides;protein binding;serine hydrolase activity;serine-type endopeptidase activity;serine-type peptidase activity	blood microparticle;extracellular membrane-bounded organelle;extracellular organelle;extracellular region part;extracellular vesicular exosome;membrane-bounded organelle;membrane-bounded vesicle;organelle;vesicle	Complement and coagulation cascades;Staphylococcus aureus infection;Systemic lupus erythematosus	E9Q6C2;Q8CG14	Complement C1s-A subcomponent;Complement C1s-A subcomponent heavy chain;Complement C1s-A subcomponent light chain	C1s1;C1sa
8.1009	9.796	9.3621	9.08633	0.097718	0.091548	0.094633	90.06	8.64	0.1	-3.38	26.9318	26.874	26.5301	26.7786	29.942	30.1402	29.9802	30.0208	29.9828	29.7522	29.8675	26.1853	25.6593	25.9223	alcohol metabolic process;amine metabolic process;anatomical structure morphogenesis;biological adhesion;biological regulation;biosynthetic process;catabolic process;cell adhesion;cell part morphogenesis;cell projection morphogenesis;cell projection organization;cell-cell adhesion;cellular amine metabolic process;cellular biogenic amine metabolic process;cellular catabolic process;cellular compon…	alcohol binding;amine binding;antioxidant activity;binding;cation binding;cholesterol binding;cholesterol transporter activity;copper ion binding;enzyme activator activity;enzyme regulator activity;identical protein binding;ion binding;lipid binding;lipid transporter activity;metal ion binding;phosphatidylcholine binding;phosphatidylcholine-sterol O-acyltransferase activator activity;phospholipid…	blood microparticle;cell part;cell surface;chylomicron;cytoplasmic part;cytosol;extracellular membrane-bounded organelle;extracellular organelle;extracellular region;extracellular region part;extracellular space;extracellular vesicular exosome;high-density lipoprotein particle;intracellular part;macromolecular complex;membrane-bounded organelle;membrane-bounded vesicle;organelle;plasma lipoprotei…	Fat digestion and absorption;Vitamin digestion and absorption	P06728	Apolipoprotein A-IV	Apoa4
NaN	9.8722	8.5845	9.22835	0.093476	0.088156	0.090816	90.2	8.32	0.09	-3.44	NaN	18.1812	19.0304	18.6058	20.3407	21.2844	22.0712	21.2321	20.8649	21.0573	20.9611	17.4241	17.1878	17.3059	biological regulation;blood coagulation;coagulation;hemostasis;multicellular organismal process;positive regulation of biological process;positive regulation of cell communication;positive regulation of cellular process;positive regulation of intracellular protein kinase cascade;positive regulation of protein kinase B signaling cascade;positive regulation of response to stimulus;positive regulati…	binding;calcium ion binding;catalytic activity;cation binding;endopeptidase activity;hydrolase activity;ion binding;lipid binding;metal ion binding;peptidase activity;peptidase activity, acting on L-amino acid peptides;phospholipid binding;serine hydrolase activity;serine-type endopeptidase activity;serine-type peptidase activity	cell part;extracellular region;intracellular membrane-bounded organelle;intracellular organelle;intracellular part;membrane;membrane-bounded organelle;organelle	Complement and coagulation cascades	Q3U3V1;O88947	Coagulation factor X;Factor X light chain;Factor X heavy chain;Activated factor Xa heavy chain	F10
8.3808	9.1478	11.213	9.58053	0.17981	0.06324	0.121525	90.48	4.93	0.05	-4.2	19.0013	17.1846	15.5284	17.2381	22.8216	23.195	22.3452	22.7873	22.8823	22.5542	22.7183	17.8742	NaN	NaN	activation of immune response;biological regulation;complement activation;complement activation, classical pathway;defense response;humoral immune response;immune effector process;immune response;immune system process;innate immune response;macromolecule metabolic process;metabolic process;positive regulation of biological process;positive regulation of immune response;positive regulation of immu…	binding;calcium ion binding;catalytic activity;cation binding;endopeptidase activity;hydrolase activity;ion binding;metal ion binding;peptidase activity;peptidase activity, acting on L-amino acid peptides;serine hydrolase activity;serine-type endopeptidase activity;serine-type peptidase activity	blood microparticle;extracellular membrane-bounded organelle;extracellular organelle;extracellular region part;extracellular space;extracellular vesicular exosome;membrane-bounded organelle;membrane-bounded vesicle;organelle;vesicle	Complement and coagulation cascades;Phagosome;Staphylococcus aureus infection;Systemic lupus erythematosus	Q8CG16;Q8CFG9	Complement C1r-A subcomponent;Complement C1r-A subcomponent heavy chain;Complement C1r-A subcomponent light chain;Complement C1r-B subcomponent;Complement C1r-B subcomponent heavy chain;Complement C1r-B subcomponent light chain	C1ra;C1rb
10.148	11.293	8.9122	10.1177	0.092183	0.09548	0.0938315	90.97	8.58	0.09	-3.41	25.4062	24.0906	23.8623	24.4531	28.3865	27.3132	27.3537	27.6845	27.3196	27.9354	27.6275	23.45	24.0206	23.7353	biological regulation;catabolic process;chemical homeostasis;cholesterol efflux;cholesterol transport;chylomicron remnant clearance;establishment of localization;establishment of protein localization;high-density lipoprotein particle clearance;homeostatic process;lipid catabolic process;lipid homeostasis;lipid metabolic process;lipid transport;lipoprotein transport;metabolic process;multicellular…	binding;enzyme activator activity;enzyme binding;enzyme inhibitor activity;enzyme regulator activity;identical protein binding;lipase activator activity;lipase inhibitor activity;lipid binding;lipoprotein lipase activator activity;phospholipase activator activity;phospholipase binding;protein binding;protein dimerization activity;protein homodimerization activity	cell part;chylomicron;cytoplasmic part;cytosol;extracellular membrane-bounded organelle;extracellular organelle;extracellular region;extracellular region part;extracellular space;extracellular vesicular exosome;high-density lipoprotein particle;intermediate-density lipoprotein particle;intracellular part;low-density lipoprotein particle;macromolecular complex;membrane-bounded organelle;membrane-b…		Q05020	Apolipoprotein C-II	Apoc2
10.248	11.393	11.313	10.9847	0.12292	0.06324	0.09308	91.72	4.93	0.05	-4.22	NaN	NaN	NaN	NaN	20.8829	21.1484	21.5441	21.1918	19.9792	20.9161	20.4477	16.532	NaN	NaN			blood microparticle;extracellular membrane-bounded organelle;extracellular organelle;extracellular region part;extracellular vesicular exosome;membrane-bounded organelle;membrane-bounded vesicle;organelle;vesicle		Q61406	Complement factor H-related 1	Cfhr1
10.248	11.393	11.313	10.9847	0.02511	0.06324	0.044175	91.72	4.93	0.05	-4.22	NaN	NaN	NaN	NaN	20.8477	NaN	20.2967	20.5722	20.0427	21.1689	20.6058	NaN	NaN	NaN					A0A075B5U4;A0A0A6YXN4	Immunoglobulin heavy variable V1-18	Ighv1-18
10.248	11.393	11.313	10.9847	0.02511	0.06324	0.044175	91.72	4.93	0.05	-4.22	NaN	NaN	NaN	NaN	22.7318	23.6213	NaN	23.1766	21.7529	21.5758	21.6643	NaN	NaN	NaN					A0A075B5W3	Immunoglobulin heavy variable 1-53	Ighv1-53
10.248	11.393	11.313	10.9847	0.02511	0.06324	0.044175	91.72	4.93	0.05	-4.22	NaN	NaN	NaN	NaN	21.9801	20.3184	NaN	21.1492	20.3261	19.8047	20.0654	NaN	NaN	NaN					A0A0B4J1I1	Immunoglobulin kappa variable 16-104	Igkv16-104
10.248	11.393	11.313	10.9847	0.02511	0.06324	0.044175	91.72	4.93	0.05	-4.22	NaN	NaN	NaN	NaN	NaN	NaN	NaN	19.2926	NaN	NaN	19.5634	NaN	NaN	NaN					A0A0G2JFN8	Immunoglobulin kappa variable 8-19	Igkv8-19
NaN	8.442	NaN	8.442	0.02511	0.087488	0.056299	91.72	4.93	0.05	-4.22	NaN	17.7408	NaN	NaN	20.0846	21.3304	20.726	20.7137	20.3442	21.0102	20.6772	NaN	17.3392	NaN	activation of immune response;biological regulation;complement activation;defense response;humoral immune response;immune effector process;immune response;immune system process;inflammatory response;macromolecule metabolic process;metabolic process;positive regulation of biological process;positive regulation of immune response;positive regulation of immune system process;positive regulation of r…	endopeptidase inhibitor activity;endopeptidase regulator activity;enzyme inhibitor activity;enzyme regulator activity;peptidase inhibitor activity;peptidase regulator activity	extracellular region		A2AS37	Expressed sequence AI182371	AI182371
NaN	NaN	5.4585	5.4585	0.12281	0.06324	0.093025	91.72	4.93	0.05	-4.22	NaN	NaN	15.0993	NaN	19.5192	19.1563	18.6486	19.1081	19.7313	19.8035	19.7674	15.749	NaN	NaN	biological regulation;blood circulation;blood coagulation;cell activation;cellular process;circulatory system process;coagulation;hemostasis;multicellular organismal process;platelet activation;regulation of biological quality;regulation of body fluid levels;system process	binding;catalytic activity;cation binding;copper ion binding;endopeptidase activity;hydrolase activity;ion binding;metal ion binding;peptidase activity;peptidase activity, acting on L-amino acid peptides;serine hydrolase activity;serine-type endopeptidase activity;serine-type peptidase activity;transition metal ion binding	cell part;cytoplasmic membrane-bounded vesicle;cytoplasmic part;cytoplasmic vesicle;endoplasmic reticulum;extracellular region part;extracellular space;Golgi apparatus;intracellular membrane-bounded organelle;intracellular organelle;intracellular part;membrane;membrane-bounded organelle;membrane-bounded vesicle;organelle;platelet alpha granule;stored secretory granule;vesicle	Complement and coagulation cascades	O88783	Coagulation factor V;Coagulation factor V heavy chain;Coagulation factor V light chain	F5
10.248	11.393	11.313	10.9847	0.02511	0.06324	0.044175	91.72	4.93	0.05	-4.22	NaN	NaN	NaN	NaN	NaN	20.342	19.7653	20.0537	19.9419	20.8256	20.3837	NaN	NaN	NaN	adaptive immune response;anatomical structure homeostasis;antibacterial humoral response;antimicrobial humoral response;biological regulation;defense response;defense response to bacterium;glomerular filtration;homeostatic process;humoral immune response;immune response;immune system process;innate immune response;multicellular organismal process;multi-organism process;positive regulation of biol…	alcohol binding;amine binding;antigen binding;binding;carbohydrate binding;cation binding;DNA binding;glycosaminoglycan binding;identical protein binding;IgA binding;immunoglobulin binding;ion binding;lipid binding;nucleic acid binding;pattern binding;peptidoglycan binding;phosphatidylcholine binding;phospholipid binding;polysaccharide binding;protein binding;protein complex binding;protein dimer…	blood microparticle;dimeric IgA immunoglobulin complex;extracellular membrane-bounded organelle;extracellular organelle;extracellular region part;extracellular space;extracellular vesicular exosome;IgA immunoglobulin complex;IgA immunoglobulin complex, circulating;IgM immunoglobulin complex;IgM immunoglobulin complex, circulating;immunoglobulin complex;immunoglobulin complex, circulating;macromol…		P01592;E9PWK4	Immunoglobulin J chain	Igj
NaN	6.9117	NaN	6.9117	0.02511	0.06324	0.044175	91.72	4.93	0.05	-4.22	NaN	19.5231	NaN	NaN	21.3431	23.7159	21.0962	22.0517	20.1978	20.9946	20.5962	NaN	NaN	NaN	biological regulation;cellular component assembly;cellular component organization;cellular component organization or biogenesis;defense response;immune response;immune system process;innate immune response;macromolecular complex assembly;macromolecular complex subunit organization;negative regulation of biological process;negative regulation of cell differentiation;negative regulation of cellular…	binding;calcium ion binding;carbohydrate binding;cation binding;complement binding;complement component C1q binding;ion binding;metal ion binding;opsonin binding;protein binding;virion binding	blood microparticle;cell part;extracellular matrix;extracellular membrane-bounded organelle;extracellular organelle;extracellular region part;extracellular space;extracellular vesicular exosome;intracellular membrane-bounded organelle;intracellular organelle;intracellular part;macromolecular complex;membrane-bounded organelle;membrane-bounded vesicle;nucleus;organelle;protein complex;vesicle		P12246	Serum amyloid P-component	Apcs
10.248	11.393	11.313	10.9847	0.02511	0.06324	0.044175	91.72	4.93	0.05	-4.22	NaN	NaN	NaN	NaN	19.6824	20.078	20.0821	19.9475	19.3305	19.3385	19.3345	NaN	NaN	NaN	biological regulation;blood coagulation;coagulation;hemostasis;macromolecule metabolic process;metabolic process;multicellular organismal process;primary metabolic process;protein maturation;protein metabolic process;protein processing;regulation of biological quality;regulation of body fluid levels;zymogen activation	binding;calcium ion binding;catalytic activity;cation binding;endopeptidase activity;hydrolase activity;ion binding;metal ion binding;peptidase activity;peptidase activity, acting on L-amino acid peptides;serine hydrolase activity;serine-type endopeptidase activity;serine-type peptidase activity	extracellular membrane-bounded organelle;extracellular organelle;extracellular region part;extracellular space;extracellular vesicular exosome;membrane-bounded organelle;membrane-bounded vesicle;organelle;vesicle	Complement and coagulation cascades	P16294	Coagulation factor IX;Coagulation factor IXa light chain;Coagulation factor IXa heavy chain	F9
1.3233	11.393	11.313	8.00977	0.02511	0.06324	0.044175	91.72	4.93	0.05	-4.22	18.5662	NaN	NaN	NaN	22.626	21.0527	18.323	20.6672	21.694	21.576	21.635	17.3194	NaN	NaN	biological regulation;biosynthetic process;cell motility;cellular biosynthetic process;cellular component movement;cellular component organization;cellular component organization or biogenesis;cellular metabolic process;cellular process;establishment of localization;fat-soluble vitamin biosynthetic process;fat-soluble vitamin metabolic process;heterocycle metabolic process;high-density lipoprotei…	binding;lipid binding	extracellular region part;extracellular space	PPAR signaling pathway	P55065;A2A5K2	Phospholipid transfer protein	Pltp
10.248	11.393	11.313	10.9847	0.02511	0.06324	0.044175	91.72	4.93	0.05	-4.22	NaN	NaN	NaN	NaN	NaN	20.3171	17.0523	18.6847	19.2059	18.5513	18.8786	NaN	NaN	NaN	aging;amine transport;amino acid transport;biological regulation;carboxylic acid transport;developmental process;establishment of localization;hormone transport;modified amino acid transport;negative regulation of catalytic activity;negative regulation of endopeptidase activity;negative regulation of hydrolase activity;negative regulation of molecular function;negative regulation of peptidase act…	binding;endopeptidase inhibitor activity;endopeptidase regulator activity;enzyme inhibitor activity;enzyme regulator activity;hormone binding;peptidase inhibitor activity;peptidase regulator activity;serine-type endopeptidase inhibitor activity	extracellular membrane-bounded organelle;extracellular organelle;extracellular region part;extracellular space;extracellular vesicular exosome;membrane-bounded organelle;membrane-bounded vesicle;organelle;vesicle		Q8BII9;Q3UEL9;P61939	Thyroxine-binding globulin	Serpina7
10.248	11.393	11.313	10.9847	0.13874	0.06324	0.10099	91.72	4.93	0.05	-4.22	NaN	NaN	NaN	NaN	18.1595	20.8755	19.8741	19.6364	21.1053	21.8765	21.4909	15.6977	NaN	NaN	biological regulation;blood coagulation;coagulation;hemostasis;multicellular organismal process;regulation of biological quality;regulation of body fluid levels		extracellular region	Complement and coagulation cascades	Q07968	Coagulation factor XIII B chain	F13b
10.248	11.393	11.313	10.9847	0.02511	0.06324	0.044175	91.72	4.93	0.05	-4.22	NaN	NaN	NaN	NaN	18.4759	19.2544	16.981	18.2371	19.1441	18.8905	19.0173	NaN	NaN	NaN	biological regulation;blood coagulation;coagulation;fibrinolysis;hemostasis;multicellular organismal process;negative regulation of biological process;negative regulation of blood coagulation;negative regulation of coagulation;negative regulation of multicellular organismal process;regulation of biological process;regulation of biological quality;regulation of blood coagulation;regulation of body…	binding;calcium ion binding;cation binding;ion binding;metal ion binding	blood microparticle;extracellular membrane-bounded organelle;extracellular organelle;extracellular region part;extracellular space;extracellular vesicular exosome;membrane-bounded organelle;membrane-bounded vesicle;organelle;vesicle	Complement and coagulation cascades	Q08761	Vitamin K-dependent protein S	Pros1
10.248	11.393	11.313	10.9847	0.02511	0.098419	0.0617645	91.72	4.93	0.05	-4.22	NaN	NaN	NaN	NaN	26.2778	22.8826	NaN	24.5802	22.4572	25.4797	23.9685	NaN	21.4933	NaN	cell differentiation;cellular developmental process;cellular process;developmental process		extracellular region		Q3V2T4;B7ZNU6;A0A087WRR2	Keratinocyte differentiation-associated protein	Krtdap
10.248	11.393	11.313	10.9847	0.02511	0.06324	0.044175	91.72	4.93	0.05	-4.22	NaN	NaN	NaN	NaN	19.8887	22.3108	19.867	20.6888	20.5491	19.782	20.1656	NaN	NaN	NaN	biological regulation;catabolic process;cellular component organization;cellular component organization or biogenesis;cellular lipid metabolic process;cellular macromolecule metabolic process;cellular metabolic process;cellular process;defense response;inflammatory response;lipid catabolic process;lipid metabolic process;lipid modification;lipid oxidation;lipoprotein metabolic process;lipoprotein…	1-alkyl-2-acetylglycerophosphocholine esterase activity;binding;calcium-independent phospholipase A2 activity;carboxylic ester hydrolase activity;catalytic activity;hydrolase activity;hydrolase activity, acting on ester bonds;lipase activity;lipid binding;phospholipase A2 activity;phospholipase activity;phospholipid binding	cell part;cytoplasm;extracellular region part;intracellular part;low-density lipoprotein particle;macromolecular complex;plasma lipoprotein particle;protein-lipid complex	Ether lipid metabolism	Q60963	Platelet-activating factor acetylhydrolase	Pla2g7
10.248	11.393	11.313	10.9847	0.02511	0.11291	0.06901	91.72	4.93	0.05	-4.22	NaN	NaN	NaN	NaN	25.2331	26.1635	25.4769	25.6245	25.9791	25.5021	25.7406	NaN	22.4486	NaN	biological regulation;chemical homeostasis;establishment of localization;homeostatic process;lipid homeostasis;lipid transport;organic substance transport;positive regulation of biological process;positive regulation of lipid storage;positive regulation of sequestering of triglyceride;regulation of biological process;regulation of biological quality;regulation of lipid storage;regulation of local…		extracellular region part;high-density lipoprotein particle;macromolecular complex;plasma lipoprotein particle;protein-lipid complex;triglyceride-rich lipoprotein particle;very-low-density lipoprotein particle		Q61268	Apolipoprotein C-IV	Apoc4
NaN	NaN	6.955	6.955	0.02511	0.06324	0.044175	91.72	4.93	0.05	-4.22	NaN	NaN	16.0509	NaN	21.0072	NaN	20.7272	20.8672	19.695	19.7608	19.7279	NaN	NaN	NaN	activation of immune response;biological regulation;complement activation;complement activation, classical pathway;complement activation, lectin pathway;defense response;humoral immune response;immune effector process;immune response;immune system process;innate immune response;macromolecule metabolic process;metabolic process;positive regulation of biological process;positive regulation of immun…	binding;calcium ion binding;calcium-dependent protein binding;catalytic activity;cation binding;complement binding;complement component C4b binding;endopeptidase activity;hydrolase activity;ion binding;metal ion binding;opsonin binding;peptidase activity;peptidase activity, acting on L-amino acid peptides;protein binding;serine hydrolase activity;serine-type endopeptidase activity;serine-type pep…	extracellular membrane-bounded organelle;extracellular organelle;extracellular region part;extracellular vesicular exosome;membrane-bounded organelle;membrane-bounded vesicle;organelle;vesicle	Complement and coagulation cascades;Staphylococcus aureus infection	Q91WP0	Mannan-binding lectin serine protease 2;Mannan-binding lectin serine protease 2 A chain;Mannan-binding lectin serine protease 2 B chain	Masp2
10.248	11.393	11.313	10.9847	0.02511	0.06324	0.044175	91.72	4.93	0.05	-4.22	NaN	NaN	NaN	NaN	20.4823	NaN	18.1128	19.2975	20.4438	19.4356	19.9397	NaN	NaN	NaN	anatomical structure development;anatomical structure morphogenesis;biological regulation;cell surface receptor linked signaling pathway;cellular process;cellular response to stimulus;defense response;developmental process;digestive system development;exocrine pancreas development;growth;inflammatory response;multicellular organism growth;multicellular organismal process;negative regulation of bi…	binding;catalytic activity;cation binding;endopeptidase activity;hydrolase activity;ion binding;metal ion binding;peptidase activity;peptidase activity, acting on L-amino acid peptides;serine hydrolase activity;serine-type endopeptidase activity;serine-type peptidase activity	extracellular region		Q91X79	Chymotrypsin-like elastase family member 1	Cela1
5.6807	11.393	11.313	9.46223	0.09904	0.06324	0.08114	91.72	4.93	0.05	-4.22	15.8798	NaN	NaN	NaN	20.6492	18.4948	NaN	19.572	18.526	17.9239	18.2249	14.2606	NaN	NaN	alcohol catabolic process;alcohol metabolic process;biological regulation;carbohydrate catabolic process;carbohydrate metabolic process;catabolic process;cellular carbohydrate catabolic process;cellular carbohydrate metabolic process;cellular component assembly;cellular component assembly at cellular level;cellular component organization;cellular component organization at cellular level;cellular …	aldehyde-lyase activity;ATPase binding;binding;carbohydrate binding;carbon-carbon lyase activity;catalytic activity;cytoskeletal protein binding;enzyme binding;fructose binding;fructose-bisphosphate aldolase activity;identical protein binding;lyase activity;monosaccharide binding;protein binding;sugar binding	cell part;centriolar satellite;cytoplasmic part;cytoskeletal part;extracellular membrane-bounded organelle;extracellular organelle;extracellular region part;extracellular vesicular exosome;intracellular organelle part;intracellular part;membrane-bounded organelle;membrane-bounded vesicle;microtubule organizing center;microtubule organizing center part;organelle;organelle part;vesicle	Carbon fixation in photosynthetic organisms;Fructose and mannose metabolism;Glycolysis / Gluconeogenesis;Pentose phosphate pathway	Q91Y97	Fructose-bisphosphate aldolase B	Aldob
6.3864	11.393	11.313	9.69747	0.02511	0.10928	0.067195	91.72	4.93	0.05	-4.22	18.364	NaN	NaN	NaN	21.3128	NaN	20.8933	21.103	19.1965	20.9989	20.0977	NaN	18.2096	NaN	anatomical structure development;developmental process;epidermis development;tissue development	cysteine-type endopeptidase inhibitor activity;endopeptidase inhibitor activity;endopeptidase regulator activity;enzyme inhibitor activity;enzyme regulator activity;peptidase inhibitor activity;peptidase regulator activity	cell part;cornified envelope;cytoskeleton;extracellular membrane-bounded organelle;extracellular organelle;extracellular region part;extracellular vesicular exosome;intracellular non-membrane-bounded organelle;intracellular organelle;intracellular part;membrane-bounded organelle;membrane-bounded vesicle;non-membrane-bounded organelle;organelle;vesicle		Q9D1B1	Cystatin E/M	Cst6
6.1174	11.393	11.313	9.6078	0.02511	0.14045	0.08278	91.72	4.93	0.05	-4.22	18.4335	NaN	NaN	NaN	21.7413	NaN	19.5809	20.6611	21.1453	23.3649	22.2551	NaN	19.6778	NaN	apoptosis;cell death;cellular process;death;programmed cell death	cargo receptor activity;receptor activity;scavenger receptor activity	blood microparticle;cell part;extracellular membrane-bounded organelle;extracellular organelle;extracellular region part;extracellular vesicular exosome;membrane;membrane-bounded organelle;membrane-bounded vesicle;organelle;vesicle		Q9QWK4	CD5 antigen-like	Cd5l
7.9393	11.393	11.313	10.2151	0.12222	0.11106	0.11664	91.72	10.43	0.11	-3.14	17.0873	NaN	NaN	NaN	19.8496	20.0625	20.9986	20.3036	19.9599	19.4863	19.7231	16.4404	16.6224	16.5314	carbohydrate catabolic process;carbohydrate metabolic process;catabolic process;metabolic process;primary metabolic process	alpha-amylase activity;amylase activity;anion binding;binding;calcium ion binding;catalytic activity;cation binding;chloride ion binding;hydrolase activity;hydrolase activity, acting on glycosyl bonds;hydrolase activity, hydrolyzing O-glycosyl compounds;ion binding;metal ion binding	extracellular membrane-bounded organelle;extracellular organelle;extracellular region part;extracellular space;extracellular vesicular exosome;membrane-bounded organelle;membrane-bounded vesicle;organelle;vesicle	Carbohydrate digestion and absorption;Starch and sucrose metabolism	P00687;D3YYQ5	Alpha-amylase 1;Alpha-amylase	Amy1
10.248	11.393	11.313	10.9847	0.1259	0.14046	0.13318	91.72	11.74	0.13	-2.97	NaN	NaN	NaN	NaN	18.8193	19.5586	NaN	19.189	19.9816	17.8968	18.9392	17.1652	15.0022	16.0837	cation transport;cellular metabolic process;cellular process;cobalamin metabolic process;cobalamin transport;cobalt ion transport;cofactor metabolic process;divalent inorganic cation transport;establishment of localization;heterocycle metabolic process;ion transport;metabolic process;metal ion transport;nitrogen compound metabolic process;porphyrin-containing compound metabolic process;small mole…	binding;cation binding;cobalamin binding;ion binding;metal ion binding;tetrapyrrole binding;vitamin binding	extracellular membrane-bounded organelle;extracellular organelle;extracellular region part;extracellular vesicular exosome;membrane-bounded organelle;membrane-bounded vesicle;organelle;vesicle	Vitamin digestion and absorption	O88968	Transcobalamin-2	Tcn2
4.5357	11.393	11.313	9.08057	0.14205	0.16996	0.156005	91.72	13.45	0.15	-2.77	18.6878	NaN	NaN	NaN	23.4994	23.4376	22.2607	23.0659	21.9551	23.0233	22.4892	17.87	18.9491	18.4096	aging;anatomical structure development;behavior;biological regulation;carbohydrate homeostasis;cell communication;cellular chemical homeostasis;cellular glucose homeostasis;cellular homeostasis;cellular process;cellular response to carbohydrate stimulus;cellular response to chemical stimulus;cellular response to cobalt ion;cellular response to corticosteroid stimulus;cellular response to dexameth…	endopeptidase inhibitor activity;endopeptidase regulator activity;enzyme inhibitor activity;enzyme regulator activity;peptidase inhibitor activity;peptidase regulator activity;serine-type endopeptidase inhibitor activity	axon hillock;axon part;basement membrane;cell part;cell projection part;cytoplasmic membrane-bounded vesicle;cytoplasmic part;cytoplasmic vesicle;extracellular matrix part;extracellular membrane-bounded organelle;extracellular organelle;extracellular region;extracellular region part;extracellular space;extracellular vesicular exosome;intracellular membrane-bounded organelle;intracellular organell…		P97298	Pigment epithelium-derived factor	Serpinf1
NaN	4.5611	NaN	4.5611	0.21297	0.20878	0.210875	91.72	17.41	0.19	-2.4	NaN	18.2029	NaN	NaN	20.3527	19.6557	NaN	20.0042	20.1069	18.8184	19.4627	18.55	16.494	17.522		antigen binding;binding	cell part;extracellular region;membrane;plasma membrane		A0A075B5T2;P01799;P01797;P01796;P01801;A0A0A6YWU3;P01804;P01803;P01798;P01802	Ig heavy chain V-III region ABE-47N;Ig heavy chain V-III region U61;Ig heavy chain V-III region A4;Ig heavy chain V-III region J606;Ig heavy chain V-III region HPC76;Ig heavy chain V region AMPC1;Ig heavy chain V-III region E109;Ig heavy chain V-III region W3082	Ighv6-3;Ighv6-7
10.248	11.393	11.313	10.9847	0.38443	0.62443	0.50443	91.72	32.88	0.36	-1.48	NaN	NaN	NaN	NaN	24.1444	21.3425	NaN	22.7435	23.9287	22.3954	23.162	22.4032	21.6554	22.0293		antigen binding;binding			P01679;P01678;P01677;P01676;P01675;A0A075B5L5;A0A0G2JGE7	Ig kappa chain V-VI region J539;Ig kappa chain V-VI region SAPC 10;Ig kappa chain V-VI region TEPC 601/TEPC 191;Ig kappa chain V-VI region XRPC 24;Ig kappa chain V-VI region XRPC 44	Igkv4-86
0.8489	11.393	11.313	7.85163	0.59401	0.60258	0.598295	91.72	37.43	0.41	-1.29	22.4041	NaN	NaN	NaN	20.8176	17.3028	NaN	19.0602	20.2996	18.4669	19.3833	19.3205	16.9283	18.1244	amine biosynthetic process;amine metabolic process;biosynthetic process;carboxylic acid biosynthetic process;carboxylic acid metabolic process;cellular amine metabolic process;cellular amino acid biosynthetic process;cellular amino acid metabolic process;cellular biosynthetic process;cellular ketone metabolic process;cellular metabolic process;cellular modified amino acid biosynthetic process;cel…	adenyl nucleotide binding;adenyl ribonucleotide binding;ATP binding;binding;catalytic activity;creatine kinase activity;kinase activity;nucleotide binding;phosphotransferase activity, nitrogenous group as acceptor;purine nucleotide binding;purine ribonucleoside triphosphate binding;purine ribonucleotide binding;ribonucleotide binding;transferase activity;transferase activity, transferring phospho…	cell part;cytoplasm;intracellular part	Arginine and proline metabolism	P07310	Creatine kinase M-type	Ckm
Values in red have been imputed

## Sheet: Cartilage
Ratio H/L A1	Ratio H/L A2	Ratio H/L A3	Ratio H/L A4	Mean Ratio H/L A	Ratio H/L B1	Ratio H/L B2	Ratio H/L B3	Ratio H/L B4	Mean Ratio H/L B	% Heavy isotope A	% Heavy isotope B	Fold change	Log fold change	iBAQ L A1	iBAQ L A2	iBAQ L A3	iBAQ L A4	iBAQ L A	iBAQ H A1	iBAQ H A2	iBAQ H A3	iBAQ H A4	iBAQ H A	iBAQ L B1	iBAQ L B2	iBAQ L B3	iBAQ L B4	iBAQ L B	iBAQ H B1	iBAQ H B2	iBAQ H B3	iBAQ H B4	iBAQ H B	GOBP name	GOMF name	GOCC name	KEGG name	Majority protein IDs	Protein names	Gene names	matrisome
4.6831	4.4611	5.0763	5.5499	4.9426	0.19727	0.17469	0.2067	0.19871	0.194342	83.17	16.27	0.2	-2.35	18.7582	18.2748	17.9443	16.7532	17.93	21.6604	20.4788	20.2764	19.655	20.52	20.5027	20.7268	20.3563	21.4579	20.76	18.1421	18.5203	18.0408	19.2498	18.49	biological regulation;cell proliferation;cellular macromolecule metabolic process;cellular metabolic process;cellular process;cellular protein metabolic process;hemopoietic stem cell proliferation;immune response;immune system process;macromolecule metabolic process;macromolecule modification;metabolic process;negative regulation of biological process;negative regulation of biosynthetic process;n…	binding;carbohydrate binding;cargo receptor activity;pattern binding;polysaccharide binding;receptor activity;scavenger receptor activity	cell part;cytoplasm;extracellular region part;extracellular space;intracellular part		E9QQ17;E0CZ58;E9QQ18;Q9JM99	Proteoglycan 4;Proteoglycan 4 C-terminal part	Prg4	#
4.4674	4.4468	4.4986	4.8093	4.55552	0.33618	0.30152	0.31484	0.30227	0.313702	82	23.88	0.29	-1.78	27.5124	27.1278	26.7349	25.9819	26.84	29.7184	29.3442	28.941	28.2599	29.07	28.3163	28.216	27.9829	28.577	28.27	26.4563	26.2617	25.7176	26.6306	26.27	anatomical structure development;biological adhesion;bone development;cartilage condensation;cell adhesion;cell-cell adhesion;cellular process;developmental process		extracellular matrix;extracellular region part;proteinaceous extracellular matrix	ECM-receptor interaction;Focal adhesion	O55226	Chondroadherin	Chad	#
2.5652	2.485	2.7196	2.8459	2.65393	0.27888	0.28319	0.27954	0.30621	0.286955	72.63	22.3	0.31	-1.7	25.4978	25.0719	24.6661	23.212	24.61	27.365	26.8872	27.0579	25.7237	26.76	26.1487	25.4013	25.9816	25.8687	25.85	23.8842	23.6564	23.0562	23.3838	23.5	aging;amine metabolic process;aminoglycan metabolic process;anatomical structure development;biological regulation;carbohydrate metabolic process;cellular macromolecule metabolic process;cellular metabolic process;cellular process;cellular protein metabolic process;chondroitin sulfate metabolic process;developmental process;glycosaminoglycan metabolic process;kidney development;macromolecule meta…	binding;carbohydrate binding;extracellular matrix binding;glycosaminoglycan binding;pattern binding;polysaccharide binding	anchoring collagen;collagen;collagen type VI;extracellular matrix part;extracellular region part;extracellular space	TGF-beta signaling pathway	P28654	Decorin	Dcn	#
3.2291	3.6778	4.4661	4.1047	3.86943	0.47857	0.39085	NaN	0.33118	0.4002	79.46	28.58	0.36	-1.48	17.9701	18.0289	15.008	16.8051	16.95	19.9938	19.7133	19.8598	18.7737	19.59	15.4338	18.1083	16.3876	17.5324	16.87	14.5955	16.4713	NaN	16.5169	15.86	biological regulation;negative regulation of biological process;negative regulation of cell differentiation;negative regulation of cellular process;negative regulation of chondrocyte differentiation;negative regulation of developmental process;regulation of biological process;regulation of cartilage development;regulation of cell differentiation;regulation of cellular process;regulation of chondr…	binding;collagen binding;protein binding	extracellular matrix;extracellular region part;proteinaceous extracellular matrix		E9Q7T7	Chondroadherin-like protein	Chadl	#
2.4842	2.6566	2.6883	2.969	2.69952	0.46554	0.39485	0.42967	0.44288	0.433235	72.97	30.23	0.41	-1.27	22.6398	21.8302	21.3175	21.0749	21.72	23.7413	23.2774	22.9771	22.5767	23.14	23.1053	21.3194	22.1041	22.6946	22.31	22.0226	20.2381	20.9133	21.0336	21.05	anatomical structure development;biological regulation;cartilage development;cellular component organization;cellular component organization at cellular level;cellular component organization or biogenesis;cellular component organization or biogenesis at cellular level;cellular process;collagen fibril organization;developmental process;extracellular matrix organization;extracellular structure orga…	binding;collagen binding;protein binding	collagen;extracellular matrix;extracellular matrix part;extracellular membrane-bounded organelle;extracellular organelle;extracellular region part;extracellular space;extracellular vesicular exosome;fibrillar collagen;membrane-bounded organelle;membrane-bounded vesicle;organelle;proteinaceous extracellular matrix;vesicle		P51885	Lumican	Lum	#
2.2181	2.2428	2.4173	2.5892	2.36685	0.53434	0.5075	0.48765	0.57017	0.524915	70.3	34.42	0.49	-1.03	25.5315	25.174	24.9551	24.9266	25.15	26.8368	26.5033	26.3451	26.3896	26.52	25.4419	25.2175	25.5548	25.5203	25.43	24.4504	24.2019	24.4223	24.806	24.47	biological adhesion;cell adhesion;cellular process		extracellular matrix;extracellular membrane-bounded organelle;extracellular organelle;extracellular region part;extracellular vesicular exosome;membrane-bounded organelle;membrane-bounded vesicle;organelle;proteinaceous extracellular matrix;vesicle		O35103	Osteomodulin	Omd	#
2.0329	2.1684	2.105	2.3446	2.16273	0.46498	0.57238	0.49207	0.54042	0.517463	68.38	34.1	0.5	-1	24.1413	23.9935	23.3404	23.0166	23.62	25.1101	25.0962	24.5892	24.4638	24.81	24.1139	23.8601	24.1462	24.1914	24.08	23.1582	23.2161	23.2814	23.2195	23.22	anatomical structure development;biological adhesion;biosynthetic process;cartilage condensation;cell adhesion;cell development;cell-cell adhesion;cellular biosynthetic process;cellular component organization;cellular component organization at cellular level;cellular component organization or biogenesis;cellular component organization or biogenesis at cellular level;cellular developmental process…	binding;carbohydrate binding;cation binding;extracellular matrix structural constituent;glycosaminoglycan binding;hyaluronic acid binding;ion binding;metal ion binding;pattern binding;polysaccharide binding;structural molecule activity	basement membrane;extracellular matrix;extracellular matrix part;extracellular region part;proteinaceous extracellular matrix		Q61282	Aggrecan core protein	Acan	#
1.1627	1.5877	1.1425	1.6022	1.37377	0.46231	0.45706	0.48024	0.38353	0.445785	57.87	30.83	0.53	-0.91	20.1856	18.7183	18.1861	18.1215	18.8	20.0367	19.1805	19.1	19.0859	19.35	18.1646	18.217	17.7524	18.1642	18.07	16.3594	15.8703	17.0964	16.8275	16.54	activation of MAPK activity;anatomical structure formation involved in morphogenesis;angiogenesis;biological regulation;cell migration;cell motility;cell proliferation;cell surface receptor linked signaling pathway;cellular component movement;cellular macromolecule metabolic process;cellular metabolic process;cellular process;cellular protein metabolic process;cellular response to stimulus;develo…	binding;enzyme binding;kinase binding;molecular transducer activity;protein binding;protein kinase binding;signal transducer activity	adherens junction;anchoring junction;apical plasma membrane;cell junction;cell part;cell projection;cell projection membrane;cell projection part;cell surface;cell-substrate adherens junction;cell-substrate junction;extracellular membrane-bounded organelle;extracellular organelle;extracellular region part;extracellular vesicular exosome;focal adhesion;integral to membrane;intrinsic to membrane;la…		Q8VHY0	Chondroitin sulfate proteoglycan 4	Cspg4	#
0.99118	1.0456	1.3315	1.419	1.19682	0.49245	0.51758	0.53191	0.56371	0.526412	54.48	34.49	0.63	-0.66	21.1247	21.0918	20.9189	19.9411	20.77	20.5465	21.6106	20.8509	20.2696	20.82	21.1655	19.5427	19.8354	19.7644	20.08	19.9243	18.6016	19.0584	18.9576	19.14	anatomical structure development;biological regulation;biomineral tissue development;bone mineralization;developmental process;negative regulation of biological process;negative regulation of biomineral tissue development;negative regulation of cell communication;negative regulation of cellular process;negative regulation of developmental process;negative regulation of multicellular organismal pr…	binding;calcium ion binding;cation binding;ion binding;metal ion binding	extracellular matrix;extracellular region part;proteinaceous extracellular matrix		Q99MQ4	Asporin	Aspn	#
1.1843	1.1648	1.1106	1.5728	1.25812	0.57628	0.69094	0.70049	0.63619	0.650975	55.72	39.43	0.71	-0.5	24.6655	24.0444	23.6361	23.3601	23.93	24.9332	24.602	24.1784	24.3235	24.51	23.6845	23.4545	23.1605	23.538	23.46	22.6425	22.554	22.4381	22.4217	22.51	anatomical structure development;biological adhesion;cell adhesion;cellular process;central nervous system development;developmental process;skeletal system development;system development	binding;carbohydrate binding;extracellular matrix structural constituent;glycosaminoglycan binding;hyaluronic acid binding;pattern binding;polysaccharide binding;structural molecule activity	extracellular matrix;extracellular region part;proteinaceous extracellular matrix		Q9QUP5	Hyaluronan and proteoglycan link protein 1	Hapln1	#
1.1958	1.1896	1.2708	1.6026	1.3147	0.61049	0.73268	0.72504	0.6615	0.682427	56.8	40.56	0.71	-0.49	22.4934	21.7944	21.2119	21.2663	21.69	22.7029	22.3502	21.4707	21.9308	22.11	21.7034	21.2473	20.7647	21.29	21.25	20.9794	20.6615	20.3082	20.7373	20.67	anatomical structure development;biological adhesion;cell adhesion;cellular process;central nervous system development;developmental process;skeletal system development;system development	binding;carbohydrate binding;extracellular matrix structural constituent;glycosaminoglycan binding;hyaluronic acid binding;pattern binding;polysaccharide binding;structural molecule activity	extracellular matrix;extracellular region part;proteinaceous extracellular matrix		Q80WM4	Hyaluronan and proteoglycan link protein 4	Hapln4	#
1.2407	1.1673	1.1848	1.0836	1.1691	0.58979	0.64713	0.65453	0.6249	0.629088	53.9	38.62	0.72	-0.48	25.9655	25.3047	24.5826	24.376	25.06	26.6621	25.6222	25.3847	24.553	25.56	25.1806	23.8207	24.6393	24.0824	24.43	23.8691	23.5163	23.4589	23.9203	23.69	aging;cell aging;cellular process;developmental process	binding;carbohydrate binding;extracellular matrix structural constituent;glycosaminoglycan binding;heparin binding;pattern binding;polysaccharide binding;structural molecule activity	extracellular matrix;extracellular membrane-bounded organelle;extracellular organelle;extracellular region part;extracellular vesicular exosome;membrane-bounded organelle;membrane-bounded vesicle;organelle;proteinaceous extracellular matrix;vesicle		Q9JK53	Prolargin	Prelp	#
0.80498	0.99095	0.82595	1.123	0.93622	0.54408	0.55331	0.56289	0.53419	0.548617	48.35	35.43	0.73	-0.45	23.1927	25.0317	25.2792	22.3562	23.97	22.9041	25.0562	25.074	22.7309	23.94	22.9035	22.0138	21.074	21.7992	21.95	21.9647	21.3375	20.687	20.902	21.22			extracellular matrix;extracellular membrane-bounded organelle;extracellular organelle;extracellular region part;extracellular space;extracellular vesicular exosome;membrane-bounded organelle;membrane-bounded vesicle;organelle;proteinaceous extracellular matrix;vesicle		Q62000	Mimecan	Ogn	#
0.81162	0.94261	0.92472	1.0479	0.931712	0.49086	0.60845	0.64009	0.59601	0.583852	48.23	36.86	0.76	-0.39	23.6393	23.8041	22.9244	22.7783	23.29	23.3782	23.8082	22.8243	23.0273	23.26	22.998	22.0383	23.0089	21.8978	22.49	22.058	21.415	22.5332	21.2642	21.82			extracellular matrix;extracellular region part;extracellular space;proteinaceous extracellular matrix		P50608	Fibromodulin	Fmod	#
0.69553	0.77916	0.72951	0.97473	0.794732	0.46796	0.58213	0.59773	0.53387	0.545422	44.28	35.29	0.8	-0.33	23.5547	22.9511	22.5454	22.0482	22.77	23.0637	22.6918	22.1728	22.1059	22.51	22.3531	21.9407	21.9742	21.6689	21.98	21.0989	21.0767	20.8933	20.7893	20.96	anatomical structure development;anatomical structure formation involved in morphogenesis;anatomical structure morphogenesis;angiogenesis;brain development;cardiac muscle tissue development;cartilage development;cartilage development involved in endochondral bone morphogenesis;cell differentiation;cellular component organization;cellular component organization at cellular level;cellular component…	binding;cation binding;enzyme binding;ion binding;metal ion binding;protease binding;protein binding;protein C-terminus binding	adherens junction;anchoring junction;basal lamina;basement membrane;cell junction;cell part;cell-substrate adherens junction;cell-substrate junction;cytoplasmic part;extracellular matrix;extracellular matrix part;extracellular membrane-bounded organelle;extracellular organelle;extracellular region;extracellular region part;extracellular space;extracellular vesicular exosome;focal adhesion;Golgi a…	ECM-receptor interaction	E9PZ16;B1B0C7;Q05793	Basement membrane-specific heparan sulfate proteoglycan core protein;Endorepellin;LG3 peptide	Hspg2	#
0.71533	0.80003	0.7436	0.98057	0.809883	0.48176	0.59087	0.62673	0.5333	0.558165	44.75	35.82	0.8	-0.32	29.7777	29.2887	28.8376	28.3924	29.07	29.258	29.0743	28.5385	28.4235	28.82	28.4649	28.3256	27.8815	28.2226	28.22	27.4067	27.6261	27.3846	27.0053	27.36	amine metabolic process;aminoglycan metabolic process;blood vessel remodeling;carbohydrate metabolic process;cellular macromolecule metabolic process;cellular metabolic process;cellular process;cellular protein metabolic process;chondroitin sulfate metabolic process;glycosaminoglycan metabolic process;macromolecule metabolic process;macromolecule modification;metabolic process;multicellular organ…	binding;carbohydrate binding;extracellular matrix binding;glycosaminoglycan binding;pattern binding;polysaccharide binding	cell part;cell surface;cytoplasmic membrane-bounded vesicle;cytoplasmic part;cytoplasmic vesicle;extracellular matrix;extracellular membrane-bounded organelle;extracellular organelle;extracellular region part;extracellular vesicular exosome;intracellular;intracellular membrane-bounded organelle;intracellular organelle;intracellular part;membrane;membrane-bounded organelle;membrane-bounded vesicle…		P28653	Biglycan	Bgn	#
2.8992	NaN	2.6123	NaN	2.75575	0.36587	0.06582	0.06582	0.01034	0.126962	73.37	9.75	0.13	-2.91	16.9418	NaN	14.8316	NaN	15.89	17.1186	NaN	18.2641	NaN	17.69	18.4135	16.6479	14.0991	NaN	16.39	15.0152	NaN	NaN	NaN	NaN	biological regulation;cellular component organization;cellular component organization at cellular level;cellular component organization or biogenesis;cellular component organization or biogenesis at cellular level;cellular process;extracellular matrix organization;extracellular structure organization;positive regulation of biological process;positive regulation of cell adhesion;positive regulatio…	binding;carbohydrate binding;collagen binding;glycosaminoglycan binding;heparin binding;pattern binding;polysaccharide binding;protein binding	extracellular matrix;extracellular region part;extracellular space;interstitial matrix;proteinaceous extracellular matrix		E9Q8E3;Q59IW9;Q59IW5;Q59IW6	ABI gene family, member 3 (NESH)-binding protein	Abi3bp	*
6.2103	7.3387	5.3862	6.796	6.4328	0.17748	0.11021	0.10304	0.14563	0.13409	86.55	11.82	0.14	-2.87	17.7193	17.3921	17.1792	18.1521	17.61	21.0607	20.8496	20.0579	20.8109	20.69	19.5937	17.7924	18.1053	16.1584	17.91	16.1466	13.5422	15.2419	13.1417	14.52	antibacterial humoral response;antimicrobial humoral response;biological adhesion;biological regulation;blood coagulation;blood coagulation, common pathway;cell adhesion;cell-cell adhesion;cell-matrix adhesion;cell-substrate adhesion;cellular component assembly;cellular component assembly at cellular level;cellular component organization;cellular component organization at cellular level;cellular …	structural molecule activity	blood microparticle;cell cortex;cell part;cell surface;cytoplasmic membrane-bounded vesicle;cytoplasmic part;cytoplasmic vesicle;external side of plasma membrane;extracellular membrane-bounded organelle;extracellular organelle;extracellular region part;extracellular space;extracellular vesicular exosome;fibrinogen complex;intracellular membrane-bounded organelle;intracellular organelle;intracellu…	Complement and coagulation cascades	E9PV24	Fibrinogen alpha chain;Fibrinopeptide A;Fibrinogen alpha chain	Fga	*
3.7468	9.1919	8.9831	9.9827	7.97612	NaN	0.27699	NaN	0.28765	0.28232	92.44	22.02	0.24	-2.07	17.6598	NaN	NaN	NaN	NaN	19.5105	NaN	18.7085	18.0473	18.76	18.2957	19.3983	15.1705	19.4861	18.09	NaN	16.0977	NaN	15.9137	16.01	biological adhesion;cell adhesion;cellular process	binding;calcium ion binding;carbohydrate binding;cation binding;glycosaminoglycan binding;heparin binding;ion binding;metal ion binding;pattern binding;polysaccharide binding	adherens junction;anchoring junction;cell junction;cell-substrate adherens junction;cell-substrate junction;extracellular matrix;extracellular membrane-bounded organelle;extracellular organelle;extracellular region part;extracellular vesicular exosome;focal adhesion;membrane-bounded organelle;membrane-bounded vesicle;organelle;proteinaceous extracellular matrix;vesicle		Q501P1	Fibulin-7	Fbln7	*
NaN	4.8382	4.4348	4.3282	4.53373	0.28899	0.21478	0.20235	0.26739	0.243378	81.93	19.57	0.24	-2.07	NaN	18.1394	14.6915	17.5526	16.79	20.0053	20.8331	20.7487	20.0636	20.41	19.5813	20.3336	18.6983	19.7664	19.59	16.7646	18.1338	16.7465	13.6367	16.32	biological regulation;cellular component organization;cellular component organization at cellular level;cellular component organization or biogenesis;cellular component organization or biogenesis at cellular level;cellular process;extracellular matrix organization;extracellular structure organization;positive regulation of biological process;positive regulation of cell adhesion;positive regulatio…	binding;carbohydrate binding;glycosaminoglycan binding;pattern binding;polysaccharide binding	extracellular matrix;extracellular region part;interstitial matrix;proteinaceous extracellular matrix		Q8VHI5	Vitrin	Vit	*
NaN	4.928	6.145	7.0217	6.03157	NaN	NaN	0.15929	0.39503	0.27716	85.78	21.7	0.25	-1.98	NaN	15.118	16.5241	16.0274	15.89	21.4792	20.6802	20.3758	20.6655	20.8	14.9077	17.3599	17.9415	16.9147	16.78	NaN	NaN	15.2038	15.8033	15.5	antibacterial humoral response;antimicrobial humoral response;biological adhesion;biological regulation;cell adhesion;cell-cell adhesion;cell-matrix adhesion;cell-substrate adhesion;cellular component assembly;cellular component assembly at cellular level;cellular component organization;cellular component organization at cellular level;cellular component organization or biogenesis;cellular compon…	binding;chaperone binding;protein binding;structural molecule activity	blood microparticle;cell cortex;cell part;cell surface;cytoplasmic membrane-bounded vesicle;cytoplasmic part;cytoplasmic vesicle;external side of plasma membrane;extracellular membrane-bounded organelle;extracellular organelle;extracellular region part;extracellular space;extracellular vesicular exosome;fibrinogen complex;intracellular membrane-bounded organelle;intracellular organelle;intracellu…	Complement and coagulation cascades	Q8K0E8	Fibrinogen beta chain;Fibrinopeptide B;Fibrinogen beta chain	Fgb	*
5.7324	4.5782	6.314	0.32166	4.23657	0.4432	0.14122	NaN	0.25117	0.27853	80.9	21.79	0.27	-1.89	18.0981	18.9276	17.2256	17.3794	17.91	21.6538	21.1708	20.2428	20.4315	20.87	18.5244	19.0974	15.0657	17.8451	17.63	15.8344	16.2596	NaN	15.9342	16.01	biological adhesion;biological regulation;cell adhesion;cell-cell adhesion;cell-matrix adhesion;cell-substrate adhesion;cellular component assembly;cellular component assembly at cellular level;cellular component organization;cellular component organization at cellular level;cellular component organization or biogenesis;cellular component organization or biogenesis at cellular level;cellular macr…	binding;cation binding;cell adhesion molecule binding;ion binding;metal ion binding;protein binding;receptor binding;structural molecule activity	blood microparticle;cell cortex;cell part;cell surface;cytoplasmic membrane-bounded vesicle;cytoplasmic part;cytoplasmic vesicle;external side of plasma membrane;extracellular membrane-bounded organelle;extracellular organelle;extracellular region part;extracellular space;extracellular vesicular exosome;fibrinogen complex;intracellular membrane-bounded organelle;intracellular organelle;intracellu…	Complement and coagulation cascades;Staphylococcus aureus infection	Q3UER8;Q8VCM7	Fibrinogen gamma chain	Fgg	*
4.1921	4.541	4.2549	4.8503	4.45958	0.3146	0.25615	0.28675	0.30947	0.291743	81.68	22.59	0.28	-1.85	22.4087	21.1735	21.2804	20.3472	21.3	24.6127	23.5683	23.6091	22.9992	23.7	22.9443	23.4282	22.3595	23.0803	22.95	21.1319	21.415	20.3802	21.4087	21.08	activation of MAPK activity;anatomical structure development;anatomical structure formation involved in morphogenesis;anatomical structure morphogenesis;angiogenesis;behavior;behavioral response to pain;biological adhesion;biological regulation;blood vessel morphogenesis;cartilage development;cartilage development involved in endochondral bone morphogenesis;cell adhesion;cell cycle arrest;cell cy…	binding;calcium ion binding;carbohydrate binding;cation binding;collagen binding;collagen V binding;extracellular matrix binding;fibrinogen binding;fibroblast growth factor binding;fibronectin binding;glycosaminoglycan binding;growth factor binding;heparin binding;integrin binding;ion binding;laminin binding;lipid binding;lipoprotein particle binding;low-density lipoprotein particle binding;metal…	cell part;cell surface;cytoplasmic membrane-bounded vesicle;cytoplasmic part;cytoplasmic vesicle;endoplasmic reticulum;external side of plasma membrane;extracellular matrix;extracellular membrane-bounded organelle;extracellular organelle;extracellular region part;extracellular space;extracellular vesicular exosome;fibrinogen complex;intracellular membrane-bounded organelle;intracellular organelle…	ECM-receptor interaction;Focal adhesion;Malaria;Phagosome;TGF-beta signaling pathway	Q80YQ1;P35441	Thrombospondin-1	Thbs1	*
19.262	9.1919	8.9831	9.9827	11.8549	NaN	0.33972	0.38302	NaN	0.36137	92.44	26.54	0.29	-1.8	NaN	NaN	NaN	NaN	NaN	19.0661	19.1708	18.6218	18.3923	18.81	19.2572	19.3161	18.406	18.8483	18.96	NaN	17.5858	17.5906	NaN	17.59	anatomical structure development;biological regulation;developmental process;negative regulation of biological process;negative regulation of biomineral tissue development;negative regulation of bone mineralization;negative regulation of developmental process;negative regulation of multicellular organismal process;negative regulation of ossification;regulation of biological process;regulation of …		extracellular matrix;extracellular region part;proteinaceous extracellular matrix		Q8K4L6	Matrix extracellular phosphoglycoprotein	Mepe	*
4.5128	4.3966	3.8664	3.8602	4.159	0.39781	0.41072	0.28119	0.32021	0.352483	80.62	26.06	0.32	-1.63	18.8766	18.4339	18.69	18.544	18.64	20.9683	21.4324	20.7608	20.8463	21	19.9799	20.2708	18.4924	19.6531	19.6	17.4981	18.1182	16.0457	17.0511	17.18	anatomical structure morphogenesis;developmental process;face morphogenesis		extracellular membrane-bounded organelle;extracellular organelle;extracellular region part;extracellular vesicular exosome;membrane-bounded organelle;membrane-bounded vesicle;organelle;vesicle		Q8CGD2	Cysteine-rich secretory protein LCCL domain-containing 1	Crispld1	*
2.9525	3.0472	3.4327	4.2828	3.4288	0.35734	0.33145	0.2927	0.40722	0.347178	77.42	25.77	0.33	-1.59	21.3873	20.2626	21.0412	18.1623	20.21	23.0489	22.019	22.7627	20.7923	22.16	21.831	21.2622	21.1277	20.7715	21.25	20.1986	19.4642	19.5697	19.585	19.7	behavior;behavioral response to pain;biological adhesion;biological regulation;cell adhesion;cell migration;cell motility;cell-cell adhesion;cellular component movement;cellular process;cellular response to stimulus;cellular response to stress;endothelial cell-cell adhesion;epithelial cell-cell adhesion;locomotion;multicellular organismal process;multicellular organismal response to stress;muscle…	binding;calcium ion binding;carbohydrate binding;cation binding;glycosaminoglycan binding;heparin binding;integrin binding;ion binding;metal ion binding;pattern binding;polysaccharide binding;protein binding;protein complex binding;receptor binding	basement membrane;cell part;cytoplasmic part;endoplasmic reticulum;extracellular matrix;extracellular matrix part;extracellular membrane-bounded organelle;extracellular organelle;extracellular region part;extracellular space;extracellular vesicular exosome;intracellular membrane-bounded organelle;intracellular organelle;intracellular part;membrane-bounded organelle;membrane-bounded vesicle;organe…	ECM-receptor interaction;Focal adhesion;Malaria;Phagosome;TGF-beta signaling pathway	Q9Z1T2	Thrombospondin-4	Thbs4	*
4.3292	5.0765	3.0461	3.4006	3.9631	0.41716	0.32771	0.31704	0.4249	0.371702	79.85	27.1	0.34	-1.56	18.8957	16.9844	16.8239	16.9563	17.42	20.5341	19.2775	18.9253	18.7615	19.37	19.4444	19.7351	19.8828	20.4402	19.88	16.1415	17.9523	18.2383	18.7205	17.76	biological regulation;negative regulation of biological process;negative regulation of cell communication;negative regulation of cellular process;negative regulation of insulin-like growth factor receptor signaling pathway;negative regulation of response to stimulus;negative regulation of signal transduction;negative regulation of signaling;regulation of biological process;regulation of cell comm…		extracellular matrix;extracellular membrane-bounded organelle;extracellular organelle;extracellular region part;extracellular space;extracellular vesicular exosome;membrane-bounded organelle;membrane-bounded vesicle;organelle;proteinaceous extracellular matrix;vesicle		Q66K08	Cartilage intermediate layer protein 1;Cartilage intermediate layer protein 1 C1;Cartilage intermediate layer protein 1 C2	Cilp	*
2.5643	2.5663	3.3531	2.6921	2.79395	0.38719	0.31522	0.32849	0.33878	0.34242	73.64	25.51	0.35	-1.53	20.7539	19.0467	18.6941	17.6579	19.04	22.3168	21.4304	20.3101	19.9003	20.99	20.6645	19.3888	18.2994	19.5444	19.47	19.0696	16.9014	16.2688	17.4106	17.41	anatomical structure formation involved in morphogenesis;angiogenesis;biological adhesion;cell adhesion;cell differentiation;cellular component organization;cellular component organization at cellular level;cellular component organization or biogenesis;cellular component organization or biogenesis at cellular level;cellular developmental process;cellular process;chondrocyte differentiation;develo…	binding;cell adhesion molecule binding;collagen binding;extracellular matrix binding;protein binding	basement membrane;cell part;cytoplasmic part;extracellular matrix;extracellular matrix part;extracellular membrane-bounded organelle;extracellular organelle;extracellular region part;extracellular space;extracellular vesicular exosome;Golgi apparatus part;intracellular organelle part;intracellular part;membrane-bounded organelle;membrane-bounded vesicle;organelle;organelle part;proteinaceous extr…		P82198	Transforming growth factor-beta-induced protein ig-h3	Tgfbi	*
19.162	6.4694	4.9369	3.7438	8.57803	0.5742	0.37182	0.39899	0.59865	0.485915	89.56	32.7	0.37	-1.45	19.4206	19.2086	23.3961	21.5363	20.89	23.4422	22.7735	25.6346	26.3191	24.54	25.0587	25.5337	25.5923	25.1321	25.33	24.5485	24.5587	22.1112	24.6654	23.97	anatomical structure development;biological adhesion;biomineral tissue development;cell adhesion;cell differentiation;cellular component organization;cellular component organization at cellular level;cellular component organization or biogenesis;cellular component organization or biogenesis at cellular level;cellular developmental process;cellular process;cellular response to chemical stimulus;ce…		cell part;extracellular region part;extracellular space;membrane;membrane-bounded vesicle;organelle;vesicle	ECM-receptor interaction;Focal adhesion	Q61711	Bone sialoprotein 2	Ibsp	*
2.8591	3.9192	2.3993	4.0146	3.29805	0.43724	0.44077	0.3362	0.45532	0.417382	76.73	29.45	0.38	-1.38	19.5775	18.4976	18.7721	18.825	18.92	21.2642	20.8579	19.8545	20.8343	20.7	19.6302	19.9962	19.8435	18.0687	19.38	18.7797	18.4918	18.5009	16.9757	18.19	biological adhesion;biological regulation;cell adhesion;cell adhesion mediated by integrin;cell differentiation;cell-matrix adhesion;cell-substrate adhesion;cellular component organization;cellular component organization at cellular level;cellular component organization or biogenesis;cellular component organization or biogenesis at cellular level;cellular developmental process;cellular process;de…	binding;carbohydrate binding;cargo receptor activity;extracellular matrix binding;glycosaminoglycan binding;heparin binding;integrin binding;pattern binding;polysaccharide binding;protein binding;protein complex binding;receptor activity;receptor binding;scavenger receptor activity	blood microparticle;extracellular matrix;extracellular membrane-bounded organelle;extracellular organelle;extracellular region part;extracellular space;extracellular vesicular exosome;membrane-bounded organelle;membrane-bounded vesicle;organelle;proteinaceous extracellular matrix;vesicle	ECM-receptor interaction;Focal adhesion	P29788	Vitronectin	Vtn	*
NaN	3.2775	3.2357	4.0446	3.51927	0.44458	0.45261	NaN	NaN	0.448595	77.87	30.97	0.4	-1.33	NaN	23.6141	23.4501	22.4692	23.18	NaN	25.3468	25.1348	24.4569	24.98	25.0471	24.4105	NaN	14.0746	21.18	23.8037	23.1998	NaN	NaN	23.5	anatomical structure development;anatomical structure formation involved in morphogenesis;biological adhesion;bone trabecula formation;cartilage development;cartilage development involved in endochondral bone morphogenesis;cell adhesion;cellular process;developmental process;growth plate cartilage development;multicellular organismal process;ossification;ossification involved in bone maturation;t…	binding;calcium ion binding;carbohydrate binding;cation binding;glycosaminoglycan binding;heparin binding;ion binding;metal ion binding;pattern binding;polysaccharide binding	cell part;cytoplasmic part;extracellular region;intracellular part;perinuclear region of cytoplasm	ECM-receptor interaction;Focal adhesion;Malaria;Phagosome;TGF-beta signaling pathway	E9PWF0;Q05895	Thrombospondin-3	Thbs3	*
3.0872	3.3484	3.4	4.0955	3.48278	0.46649	0.44269	0.45617	0.45016	0.453878	77.69	31.22	0.4	-1.32	25.4599	25.1617	24.1747	23.7468	24.64	27.3687	27.1626	26.2314	25.9245	26.67	26.8843	26.4915	26.723	26.3693	26.62	25.7601	25.3608	25.7504	25.3865	25.56	anatomical structure development;apoptosis;appendage development;biological adhesion;biological regulation;cartilage development;cartilage development involved in endochondral bone morphogenesis;cell adhesion;cell death;cellular component organization;cellular component organization at cellular level;cellular component organization or biogenesis;cellular component organization or biogenesis at ce…	binding;calcium ion binding;carbohydrate binding;cation binding;collagen binding;enzyme binding;extracellular matrix structural constituent;glycoprotein binding;glycosaminoglycan binding;heparan sulfate proteoglycan binding;heparin binding;ion binding;metal ion binding;pattern binding;polysaccharide binding;protease binding;protein binding;proteoglycan binding;structural molecule activity	extracellular matrix;extracellular membrane-bounded organelle;extracellular organelle;extracellular region part;extracellular space;extracellular vesicular exosome;membrane-bounded organelle;membrane-bounded vesicle;organelle;proteinaceous extracellular matrix;vesicle	ECM-receptor interaction;Focal adhesion;Malaria;Phagosome;TGF-beta signaling pathway	Q9R0G6	Cartilage oligomeric matrix protein	Comp	*
1.0764	0.76483	NaN	NaN	0.920615	NaN	0.19744	0.3557	0.17177	0.241637	47.93	19.46	0.41	-1.3	17.5542	17.8481	NaN	NaN	17.7	18.8559	16.1778	16.6658	16.4687	17.04	NaN	17.7902	16.4748	18.6317	17.63	NaN	14.2781	14.7031	13.6854	14.22	biological adhesion;biological regulation;cell adhesion;cellular process;developmental process;multicellular organismal development;multicellular organismal process;positive regulation of biological process;positive regulation of cell adhesion;positive regulation of cell-substrate adhesion;positive regulation of cellular process;regulation of biological process;regulation of cell adhesion;regulat…	binding;calcium ion binding;cation binding;ion binding;metal ion binding	extracellular membrane-bounded organelle;extracellular organelle;extracellular region part;extracellular vesicular exosome;membrane-bounded organelle;membrane-bounded vesicle;organelle;vesicle		Q8C4U8;O35474;Q8C8K0	EGF-like repeat and discoidin I-like domain-containing protein 3	Edil3	*
0.71371	1.0069	0.88776	1.2123	0.955167	0.25715	0.29885	NaN	NaN	0.278	48.85	21.75	0.45	-1.17	15.0857	14.828	14.5109	13.634	14.51	15.349	15.2129	14.3748	14.3596	14.82	14.0685	14.0744	13.8684	13.6844	13.92	12.4487	11.9989	NaN	NaN	12.22	anatomical structure development;anatomical structure morphogenesis;astrocyte development;axon extension;axon extension involved in development;axon extension involved in regeneration;axon guidance;biological adhesion;cell adhesion;cell development;cell growth;cell morphogenesis;cell morphogenesis involved in differentiation;cell projection organization;cellular component morphogenesis;cellular c…	binding;integrin binding;protein binding;protein complex binding;receptor binding	basal lamina;basement membrane;extracellular matrix part;extracellular membrane-bounded organelle;extracellular organelle;extracellular region;extracellular region part;extracellular vesicular exosome;laminin complex;laminin-3 complex;macromolecular complex;membrane-bounded organelle;membrane-bounded vesicle;organelle;protein complex;synapse;vesicle	Amoebiasis;ECM-receptor interaction;Focal adhesion;Pathways in cancer;Small cell lung cancer;Toxoplasmosis	Q61292	Laminin subunit beta-2	Lamb2	*
0.83725	0.74582	0.69791	1.0055	0.82162	0.25126	0.32696	NaN	0.23972	0.272647	45.1	21.42	0.47	-1.07	14.627	15.0164	15.0846	15.0767	14.95	14.2879	15.0225	14.998	14.8061	14.78	13.9623	13.2712	13.5407	13.5895	13.59	12.0493	11.3736	NaN	11.919	11.78	anatomical structure development;biological adhesion;biological regulation;blood vessel development;brown fat cell differentiation;cell adhesion;cell differentiation;cellular developmental process;cellular process;developmental process;fat cell differentiation;regulation of biological process;regulation of cell adhesion;regulation of cell migration;regulation of cell motility;regulation of cellul…		basal lamina;basement membrane;extracellular matrix part;extracellular membrane-bounded organelle;extracellular organelle;extracellular region;extracellular region part;extracellular vesicular exosome;laminin complex;laminin-1 complex;macromolecular complex;membrane-bounded organelle;membrane-bounded vesicle;organelle;protein complex;vesicle	African trypanosomiasis;Amoebiasis;ECM-receptor interaction;Focal adhesion;Pathways in cancer;Small cell lung cancer;Toxoplasmosis	P97927	Laminin subunit alpha-4	Lama4	*
1.9904	1.9833	1.7267	2.1284	1.9572	0.47181	0.42531	0.47684	0.49371	0.466917	66.18	31.83	0.48	-1.06	19.122	18.2933	17.8775	16.8532	18.04	20.1547	19.2428	18.7238	18.2926	19.1	19.6312	18.3635	17.6291	18.1241	18.44	18.7081	17.3849	16.0264	17.4916	17.4	acylglycerol metabolic process;biological adhesion;biological regulation;carboxylic acid metabolic process;cell adhesion;cell-cell adhesion;cell-matrix adhesion;cell-substrate adhesion;cellular component assembly;cellular component assembly at cellular level;cellular component organization;cellular component organization at cellular level;cellular component organization or biogenesis;cellular com…	binding;carbohydrate binding;collagen binding;glycosaminoglycan binding;heparin binding;pattern binding;polysaccharide binding;protein binding	cell part;extracellular matrix;extracellular membrane-bounded organelle;extracellular organelle;extracellular region;extracellular region part;extracellular space;extracellular vesicular exosome;intracellular;membrane-bounded organelle;membrane-bounded vesicle;organelle;proteinaceous extracellular matrix;vesicle		O35452	Tenascin X	Tnxb	*
2.4681	NaN	2.4035	1.711	2.1942	0.57297	0.56035	0.42308	NaN	0.5188	68.69	34.16	0.5	-1.01	18.8094	18.5448	18.7509	16.7571	18.22	20.2495	NaN	20.4671	17.5204	19.41	20.0836	19.5701	19.0322	19.8443	19.63	18.9624	18.5704	17.317	NaN	18.28	alcohol metabolic process;anatomical structure morphogenesis;biological regulation;carbohydrate homeostasis;carbohydrate metabolic process;cell differentiation;cell proliferation;cellular carbohydrate metabolic process;cellular developmental process;cellular metabolic process;cellular process;cellular response to cAMP;cellular response to chemical stimulus;cellular response to organic cyclic comp…	binding;fibronectin binding;growth factor binding;insulin-like growth factor binding;insulin-like growth factor I binding;insulin-like growth factor II binding;protein binding	extracellular region part;extracellular space;insulin-like growth factor binding protein complex;macromolecular complex;protein complex		Q07079	Insulin-like growth factor-binding protein 5	Igfbp5	*
2.9877	2.993	3.9624	3.7631	3.42655	0.67827	0.57245	0.62936	0.68401	0.641023	77.41	39.06	0.5	-0.99	24.0842	23.5833	23.8035	22.9475	23.6	26.1102	25.5562	25.7064	25.0163	25.6	25.2771	25.0649	25.3709	25.3713	25.27	24.6835	24.1799	24.4307	24.7494	24.51	anatomical structure development;biological adhesion;biological regulation;biomineral tissue development;cell adhesion;cell chemotaxis;cell differentiation;cell migration;cell motility;cellular component movement;cellular developmental process;cellular process;cellular response to chemical stimulus;cellular response to fluid shear stress;cellular response to stimulus;cellular response to stress;c…	binding;cytokine activity;extracellular matrix binding;protein binding;receptor binding	apical part of cell;cell part;cell projection;cytoplasm;cytoplasmic part;extracellular membrane-bounded organelle;extracellular organelle;extracellular region;extracellular region part;extracellular space;extracellular vesicular exosome;intracellular part;membrane-bounded organelle;membrane-bounded vesicle;organelle;perinuclear region of cytoplasm;vesicle	ECM-receptor interaction;Focal adhesion;Toll-like receptor signaling pathway	P10923;F8WIP8	Osteopontin	Spp1	*
1.0992	1.1073	1.034	1.65	1.22262	0.40806	0.29735	0.52025	0.31812	0.385945	55.01	27.85	0.51	-0.98	21.4804	20.7069	20.7942	19.9915	20.74	21.8675	21.0841	21.3145	20.5484	21.2	21.4879	20.1923	19.2811	19.8874	20.21	20.1519	17.8416	18.4556	18.2144	18.67	biological adhesion;biological regulation;cell adhesion;cellular component organization;cellular component organization at cellular level;cellular component organization or biogenesis;cellular component organization or biogenesis at cellular level;cellular process;collagen fibril organization;extracellular matrix organization;extracellular structure organization;negative regulation of biological …		extracellular matrix;extracellular membrane-bounded organelle;extracellular organelle;extracellular region part;extracellular space;extracellular vesicular exosome;membrane-bounded organelle;membrane-bounded vesicle;organelle;proteinaceous extracellular matrix;vesicle		Q9QZZ6	Dermatopontin	Dpt	*
1.963	1.7858	1.9028	2.7057	2.08933	0.49978	0.58071	0.54828	0.48763	0.5291	67.63	34.6	0.51	-0.97	20.9277	20.9606	19.837	19.5291	20.31	21.5707	22.5317	20.9171	21.0803	21.53	21.0346	20.6191	20.2642	20.8655	20.7	19.5652	19.9834	17.7564	19.6955	19.25	biological regulation;cellular component organization;cellular component organization at cellular level;cellular component organization or biogenesis;cellular component organization or biogenesis at cellular level;cellular process;extracellular matrix organization;extracellular structure organization;positive regulation of biological process;positive regulation of cell adhesion;positive regulatio…	binding;carbohydrate binding;collagen binding;collagen V binding;glycosaminoglycan binding;heparin binding;pattern binding;polysaccharide binding;protein binding	extracellular matrix;extracellular region part;interstitial matrix;proteinaceous extracellular matrix		Q5FW85	Extracellular matrix protein 2	Ecm2	*
2.4185	2.3078	2.5339	3.2854	2.6364	0.58572	0.56398	0.58806	0.62496	0.59068	72.5	37.13	0.51	-0.97	24.4848	23.9492	23.2011	22.339	23.49	25.8437	25.3557	24.6486	24.1491	25	24.8044	24.2854	24.7532	24.7121	24.64	23.9955	23.3487	23.981	23.9228	23.81	acute inflammatory response;acute-phase response;anatomical structure formation involved in morphogenesis;anatomical structure morphogenesis;angiogenesis;biological adhesion;biological regulation;calcium-independent cell-matrix adhesion;cell adhesion;cell differentiation;cell junction assembly;cell junction organization;cell morphogenesis;cell morphogenesis involved in differentiation;cell-matrix…	binding;carbohydrate binding;enzyme activator activity;enzyme binding;enzyme regulator activity;glycosaminoglycan binding;heparin binding;integrin binding;pattern binding;peptidase activator activity;peptidase regulator activity;polysaccharide binding;protease binding;protein binding;protein complex binding;receptor binding	apical plasma membrane;basal lamina;basement membrane;blood microparticle;cell part;cytoplasmic part;endoplasmic reticulum-Golgi intermediate compartment;extracellular matrix;extracellular matrix part;extracellular membrane-bounded organelle;extracellular organelle;extracellular region part;extracellular space;extracellular vesicular exosome;fibrinogen complex;intracellular membrane-bounded organ…	Amoebiasis;Bacterial invasion of epithelial cells;ECM-receptor interaction;Focal adhesion;Pathways in cancer;Regulation of actin cytoskeleton;Small cell lung cancer	A0A087WSN6;B9EHT6;A0A087WR50;Q3UHL6;P11276;B7ZNJ1;A0A087WS56	Fibronectin;Anastellin	Fn1	*
0.32526	0.39603	0.74885	0.79045	0.565148	0.29681	0.27695	0.2363	0.20959	0.254912	36.11	20.31	0.56	-0.83	19.6493	18.5319	18.968	17.6276	18.69	17.2931	17.3561	18.0232	17.1522	17.46	18.0887	18.4164	17.578	17.7235	17.95	15.1848	15.0918	15.1761	14.4893	14.99	anatomical structure morphogenesis;axis elongation;axon regeneration;axonogenesis;biological adhesion;biological regulation;branch elongation of an epithelium;bud outgrowth involved in lung branching;cell adhesion;cell communication;cell differentiation;cell part morphogenesis;cell projection morphogenesis;cell projection organization;cell-cell signaling;cellular component morphogenesis;cellular …	binding;fibronectin binding;protein binding;syndecan binding	adherens junction;anchoring junction;basement membrane;cell junction;cell part;cell-substrate adherens junction;cell-substrate junction;extracellular matrix;extracellular matrix part;extracellular region;extracellular region part;extracellular space;focal adhesion;interstitial matrix;membrane;proteinaceous extracellular matrix	ECM-receptor interaction;Focal adhesion	Q80YX1;Q80YX0	Tenascin	Tnc	*
NaN	2.2777	NaN	2.9466	2.61215	0.68701	0.70373	0.5569	0.83326	0.695225	72.32	41.01	0.57	-0.82	NaN	19.8364	NaN	19.0954	19.47	20.2037	20.1957	20.2891	20.7301	20.35	19.9433	18.3477	20.101	19.629	19.51	19.324	17.6405	19.5182	19.8257	19.08	anatomical structure development;biological regulation;biomineral tissue development;cellular component organization;cellular component organization at cellular level;cellular component organization or biogenesis;cellular component organization or biogenesis at cellular level;cellular process;developmental process;extracellular matrix organization;extracellular structure organization;multicellula…	binding;extracellular matrix binding	cell part;cytoplasm;extracellular matrix;extracellular region part;intracellular membrane-bounded organelle;intracellular non-membrane-bounded organelle;intracellular organelle;intracellular organelle part;intracellular part;membrane-bounded organelle;non-membrane-bounded organelle;nuclear part;nucleolus;nucleoplasm;nucleus;organelle;organelle part;proteinaceous extracellular matrix		O55188	Dentin matrix acidic phosphoprotein 1	Dmp1	*
2.7821	3.0428	3.5187	3.764	3.2769	0.914	0.8567	0.85774	0.9261	0.888635	76.62	47.05	0.61	-0.7	25.6701	25.6616	24.9247	24.67	25.23	27.1278	27.2917	26.6769	26.5563	26.91	25.036	24.8189	24.7631	25.2114	24.96	24.9494	24.6685	24.6283	25.1362	24.85	anatomical structure development;biological regulation;bone development;cellular process;cellular response to chemical stimulus;cellular response to growth factor stimulus;cellular response to organic substance;cellular response to stimulus;developmental process;heart development;inner ear development;lung development;multicellular organismal process;negative regulation of angiogenesis;negative r…	binding;calcium ion binding;cation binding;collagen binding;extracellular matrix binding;ion binding;metal ion binding;protein binding	basement membrane;cell part;cell surface;cytoplasmic membrane-bounded vesicle;cytoplasmic part;cytoplasmic vesicle;cytoplasmic vesicle membrane;cytoplasmic vesicle part;extracellular matrix;extracellular matrix part;extracellular region part;extracellular space;intracellular membrane-bounded organelle;intracellular organelle;intracellular organelle part;intracellular part;membrane;membrane-bounde…		Q5NCU4;P07214	SPARC	Sparc	*
1.4713	0.68155	3.0149	0.69106	1.4647	0.52525	0.53583	0.5907	0.67401	0.581448	59.43	36.77	0.62	-0.69	22.3473	21.6881	20.5373	19.9043	21.12	22.2553	22.066	20.2859	20.3927	21.25	22.1141	20.6061	20.7891	21.4756	21.25	21.2034	19.7566	20.2714	19.6016	20.21		binding;carbohydrate binding	extracellular membrane-bounded organelle;extracellular organelle;extracellular region part;extracellular vesicular exosome;membrane-bounded organelle;membrane-bounded vesicle;organelle;vesicle		D3Z7H8	Cartilage intermediate layer protein 2	Cilp2	*
0.22848	0.39444	0.37089	0.48895	0.37069	0.33156	0.12117	0.21728	0.15357	0.205895	27.04	17.07	0.63	-0.66	20.9014	20.17	20.5957	19.2754	20.24	17.3326	18.8858	19.4644	18.2385	18.48	16.6734	15.9565	15.7172	15.7493	16.02	14.6469	12.8399	19.2359	13.5297	15.06	anatomical structure development;biological adhesion;biological regulation;cell adhesion;cellular component organization;cellular component organization at cellular level;cellular component organization or biogenesis;cellular component organization or biogenesis at cellular level;cellular process;developmental process;extracellular matrix organization;extracellular structure organization;regulati…	binding;carbohydrate binding;cell adhesion molecule binding;glycosaminoglycan binding;heparin binding;pattern binding;polysaccharide binding;protein binding	cell part;cytoplasmic part;extracellular matrix;extracellular region part;extracellular space;Golgi apparatus part;intracellular organelle part;intracellular part;organelle part;proteinaceous extracellular matrix;trans-Golgi network		Q62009	Periostin	Postn	*
1.6122	1.7849	1.8552	2.0599	1.82805	0.78271	0.77866	0.80713	0.81677	0.796318	64.64	44.33	0.69	-0.54	28.1604	27.9168	27.3023	27.0005	27.6	29.0174	28.7886	28.3302	28.2013	28.58	27.5667	27.7549	27.1897	27.8206	27.58	27.1914	27.1384	26.6153	27.511	27.11	anatomical structure formation involved in morphogenesis;angiogenesis;biological adhesion;biological regulation;cell adhesion;cell recognition;cellular component organization;cellular component organization or biogenesis;cellular membrane organization;cellular process;developmental process;fertilization;membrane invagination;membrane organization;phagocytosis, engulfment;phagocytosis, recognition…	binding;integrin binding;lipid binding;phosphatidylethanolamine binding;phosphatidylserine binding;phospholipid binding;protein binding;protein complex binding;receptor binding	cell part;external side of plasma membrane;extracellular matrix;extracellular membrane-bounded organelle;extracellular organelle;extracellular region part;extracellular space;extracellular vesicular exosome;extrinsic to membrane;extrinsic to plasma membrane;membrane;membrane part;membrane-bounded organelle;membrane-bounded vesicle;organelle;plasma membrane part;vesicle		P21956	Lactadherin	Mfge8	*
0.63152	0.65983	0.77168	0.88239	0.736355	0.34184	0.54999	0.46813	0.38759	0.436887	42.41	30.41	0.72	-0.48	21.7806	20.7687	21.0245	20.7865	21.09	21.2228	19.7578	20.801	20.541	20.58	20.2236	19.5589	19.7862	19.4689	19.76	18.5552	18.8014	18.664	18.5507	18.64	biological adhesion;cell adhesion;cell-matrix adhesion;cell-substrate adhesion;cellular process	binding;calcium ion binding;cation binding;ion binding;metal ion binding	basement membrane;cell part;cell surface;extracellular matrix;extracellular matrix part;extracellular membrane-bounded organelle;extracellular organelle;extracellular region;extracellular region part;extracellular vesicular exosome;membrane-bounded organelle;membrane-bounded vesicle;organelle;proteinaceous extracellular matrix;vesicle		O88322	Nidogen-2	Nid2	*
0.95155	1.0718	1.0255	1.156	1.05121	0.551	0.66446	0.66132	0.60938	0.62154	51.25	38.33	0.75	-0.42	23.9254	23.8118	23.223	22.8718	23.46	23.9202	23.7875	23.4743	23.1767	23.59	23.2261	23.006	23.1812	23.1871	23.15	22.3713	22.5155	22.6271	22.5421	22.51	anatomical structure formation involved in morphogenesis;angiogenesis;behavior;biological adhesion;biological regulation;cell adhesion;cell motility;cell-cell adhesion;cellular component movement;cellular process;developmental process;locomotion;positive regulation of angiogenesis;positive regulation of biological process;positive regulation of blood vessel endothelial cell migration;positive reg…	binding;identical protein binding;protein binding;receptor binding	cell junction;cell part;cell surface;cytoplasm;cytoskeleton;excitatory synapse;extracellular region part;extracellular space;intracellular non-membrane-bounded organelle;intracellular organelle;intracellular part;membrane;microtubule cytoskeleton;non-membrane-bounded organelle;organelle;synapse;synapse part;synaptic membrane		Q8R054	Sushi repeat-containing protein SRPX2	Srpx2	*
0.60015	0.66844	0.72225	0.75387	0.686177	0.35664	0.60159	0.53694	0.41445	0.477405	40.69	32.31	0.79	-0.33	22.5011	22.0812	21.949	22.187	22.18	21.6517	21.9018	21.7345	21.3902	21.67	21.4367	21.1638	20.7463	21.2535	21.15	20.0419	20.4914	20.0021	19.8205	20.09	autophagy;biological regulation;catabolic process;cellular catabolic process;cellular component assembly;cellular component assembly at cellular level;cellular component organization;cellular component organization at cellular level;cellular component organization or biogenesis;cellular component organization or biogenesis at cellular level;cellular membrane fusion;cellular membrane organization;…		autophagic vacuole;cell part;cytoplasmic part;endoplasmic reticulum;intracellular membrane-bounded organelle;intracellular organelle;intracellular part;membrane-bounded organelle;organelle;vacuole		A2BE45;Q9R0M3	Sushi-repeat-containing protein SRPX	Srpx	*
0.69019	0.69057	0.56428	0.92111	0.716538	0.4951	0.57585	0.5297	0.56955	0.54255	41.74	35.17	0.84	-0.25	21.3241	20.7709	20.1847	19.6361	20.48	20.47	20.9939	19.1998	19.6181	20.07	20.4907	19.4158	19.5706	19.3871	19.72	19.1668	18.3931	18.7819	18.9995	18.84	behavior;behavioral response to pain;cellular component organization;cellular component organization at cellular level;cellular component organization or biogenesis;cellular component organization or biogenesis at cellular level;cellular process;extracellular matrix organization;extracellular structure organization;multicellular organismal process;multicellular organismal response to stress;respo…	binding;identical protein binding;protein binding	basement membrane;extracellular matrix;extracellular matrix part;extracellular membrane-bounded organelle;extracellular organelle;extracellular region;extracellular region part;extracellular space;extracellular vesicular exosome;interstitial matrix;membrane-bounded organelle;membrane-bounded vesicle;organelle;proteinaceous extracellular matrix;vesicle		Q8R2Z5	von Willebrand factor A domain-containing protein 1	Vwa1	*
0.34607	0.44447	0.44687	0.53599	0.44335	0.37098	0.34128	0.41485	0.3069	0.358502	30.72	26.39	0.86	-0.22	23.3764	23.0627	22.6505	22.0857	22.79	21.4194	21.5937	21.0137	21.103	21.28	22.9274	21.8808	21.7962	21.2698	21.97	21.128	19.8793	19.9973	19.1309	20.03	anatomical structure development;anatomical structure morphogenesis;cellular process;cellular response to chemical stimulus;cellular response to endogenous stimulus;cellular response to growth factor stimulus;cellular response to organic substance;cellular response to stimulus;cellular response to transforming growth factor beta stimulus;developmental process;heart development;kidney development;…	binding;calcium ion binding;cation binding;extracellular matrix structural constituent;ion binding;metal ion binding;structural molecule activity	basement membrane;extracellular matrix;extracellular matrix part;extracellular membrane-bounded organelle;extracellular organelle;extracellular region part;extracellular space;extracellular vesicular exosome;fibril;membrane-bounded organelle;membrane-bounded vesicle;microfibril;organelle;proteinaceous extracellular matrix;vesicle		A2AQ53	Fibrillin-1	Fbn1	*
NaN	0.64456	NaN	0.55688	0.60072	0.12013	0.06582	0.06582	0.01034	0.0655275	37.53	9.75	0.26	-1.94	15.5173	15.5061	15.0073	14.0168	15.01	NaN	14.5401	NaN	13.9455	14.24	12.7836	13.5052	14.1334	13.8684	13.57	NaN	NaN	NaN	NaN	NaN	biological adhesion;cell adhesion;cell-matrix adhesion;cell-substrate adhesion;cellular component organization;cellular component organization at cellular level;cellular component organization or biogenesis;cellular component organization or biogenesis at cellular level;cellular process;extracellular matrix organization;extracellular structure organization	binding;carbohydrate binding;extracellular matrix structural constituent;glycosaminoglycan binding;heparin binding;pattern binding;polysaccharide binding;structural molecule activity	collagen;collagen type V;extracellular matrix part;extracellular membrane-bounded organelle;extracellular organelle;extracellular region part;extracellular vesicular exosome;fibrillar collagen;membrane-bounded organelle;membrane-bounded vesicle;organelle;vesicle	Amoebiasis;ECM-receptor interaction;Focal adhesion;Protein digestion and absorption	Q9JLI2	Collagen type V alpha 3 chain	Col5a3	+
1.4158	1.4731	1.4476	2.26	1.64912	0.48639	0.57745	0.54633	0.47593	0.521525	62.25	34.28	0.55	-0.86	22.9778	23.1346	22.4536	22.5257	22.77	23.0838	23.3218	22.5793	23.1131	23.02	22.342	22.2384	21.8834	22.4136	22.22	21.2202	21.3569	20.9871	21.3599	21.23	anatomical structure development;anatomical structure morphogenesis;biological adhesion;cardiac muscle tissue morphogenesis;cartilage condensation;cartilage development;cell adhesion;cell development;cell differentiation;cell-cell adhesion;cellular component organization;cellular component organization at cellular level;cellular component organization or biogenesis;cellular component organization…	binding;cation binding;extracellular matrix structural constituent;ion binding;metal ion binding;structural molecule activity	collagen;collagen type XI;extracellular matrix;extracellular matrix part;extracellular region part;fibrillar collagen;proteinaceous extracellular matrix	Amoebiasis;ECM-receptor interaction;Focal adhesion;Protein digestion and absorption	Q61245	Collagen alpha-1(XI) chain	Col11a1	+
1.6695	1.6947	1.5918	2.0467	1.75068	0.52647	0.31703	0.57515	0.7984	0.554262	63.65	35.66	0.56	-0.84	14.5501	15.0139	14.1214	14.5429	14.56	15.4979	15.4866	14.5771	15.1622	15.18	14.9397	17.4108	14.5969	13.5645	15.13	13.6585	14.9257	13.7733	13.4628	13.96	anatomical structure formation involved in morphogenesis;angiogenesis;biological regulation;biosynthetic process;cell differentiation;cellular biosynthetic process;cellular developmental process;cellular macromolecule biosynthetic process;cellular macromolecule metabolic process;cellular metabolic process;cellular nitrogen compound metabolic process;cellular process;cellular response to chemical …	extracellular matrix structural constituent;structural molecule activity	basement membrane;cell part;collagen;collagen type IV;extracellular matrix;extracellular matrix part;extracellular membrane-bounded organelle;extracellular organelle;extracellular region;extracellular region part;extracellular vesicular exosome;intracellular membrane-bounded organelle;intracellular organelle;intracellular part;membrane-bounded organelle;membrane-bounded vesicle;organelle;sheet-fo…	Amoebiasis;ECM-receptor interaction;Focal adhesion;Pathways in cancer;Protein digestion and absorption;Small cell lung cancer	P08122	Collagen alpha-2(IV) chain;Canstatin	Col4a2	+
0.25516	0.40915	0.41242	0.74936	0.456522	0.15598	0.23059	0.24464	0.23303	0.21606	31.34	17.77	0.57	-0.82	28.5771	27.663	27.7626	26.8848	27.72	26.5186	26.3013	26.3692	26.4124	26.4	28.2283	26.4753	27.3964	26.6699	27.19	25.5522	24.2892	25.185	24.5598	24.9	anatomical structure development;anatomical structure formation involved in morphogenesis;anatomical structure morphogenesis;biological regulation;biomineral tissue development;biosynthetic process;blood vessel development;bone trabecula formation;cartilage development;cartilage development involved in endochondral bone morphogenesis;cell communication;cell differentiation;cellular component asse…	binding;cation binding;extracellular matrix structural constituent;growth factor binding;identical protein binding;ion binding;metal ion binding;platelet-derived growth factor binding;protein binding;structural molecule activity	cell part;collagen;collagen type I;cytoplasm;cytoplasmic membrane-bounded vesicle;cytoplasmic part;cytoplasmic vesicle;endoplasmic reticulum;extracellular matrix;extracellular matrix part;extracellular region part;extracellular space;fibrillar collagen;Golgi apparatus;intracellular membrane-bounded organelle;intracellular organelle;intracellular part;membrane-bounded organelle;membrane-bounded ve…	Amoebiasis;ECM-receptor interaction;Focal adhesion;Protein digestion and absorption	P11087	Collagen alpha-1(I) chain	Col1a1	+
0.23872	0.42134	0.3979	0.72418	0.445535	0.16316	0.23848	0.23379	0.23876	0.218547	30.82	17.94	0.58	-0.78	27.7015	27.234	27.0983	26.5701	27.15	25.6899	26.1137	25.9945	26.1629	25.99	27.3381	25.5826	26.7817	25.8623	26.39	24.9316	23.5861	24.9207	24.0986	24.38	anatomical structure development;anatomical structure morphogenesis;biological regulation;blood vessel development;cell surface receptor linked signaling pathway;cellular component assembly;cellular component organization;cellular component organization at cellular level;cellular component organization or biogenesis;cellular component organization or biogenesis at cellular level;cellular process;…	binding;binding, bridging;cation binding;extracellular matrix structural constituent;growth factor binding;identical protein binding;ion binding;metal ion binding;platelet-derived growth factor binding;protein binding;protein binding, bridging;SMAD binding;structural molecule activity	collagen;collagen type I;extracellular matrix;extracellular matrix part;extracellular membrane-bounded organelle;extracellular organelle;extracellular region part;extracellular space;extracellular vesicular exosome;fibrillar collagen;membrane-bounded organelle;membrane-bounded vesicle;organelle;vesicle	Amoebiasis;ECM-receptor interaction;Focal adhesion;Protein digestion and absorption	Q01149	Collagen alpha-2(I) chain	Col1a2	+
0.26362	NaN	0.15157	0.38169	0.265627	NaN	0.11331	0.16633	NaN	0.13982	20.99	12.27	0.58	-0.77	18.8399	20.6164	16.8205	16.2881	18.14	15.9082	NaN	12.2446	13.1253	13.76	17.005	17.204	15.8923	17.2283	16.83	NaN	12.401	11.7488	NaN	12.07					E9Q7P1	Collagen, type XXII, alpha 1	Col22a1	+
0.45889	0.53367	0.60708	0.64478	0.561105	0.23292	0.34579	0.29296	0.22245	0.27353	35.94	21.48	0.6	-0.74	20.9704	20.2409	20.3288	20.0479	20.4	20.0317	19.5416	19.8656	19.572	19.75	17.9867	17.9485	17.9046	18.7913	18.16	14.5242	16.3042	16.4077	17.2102	16.11	anatomical structure development;anatomical structure homeostasis;biological regulation;cardiac muscle tissue development;cellular component organization;cellular component organization at cellular level;cellular component organization or biogenesis;cellular component organization or biogenesis at cellular level;cellular process;collagen fibril organization;developmental process;extracellular mat…		collagen;extracellular matrix;extracellular matrix part;extracellular membrane-bounded organelle;extracellular organelle;extracellular region part;extracellular space;extracellular vesicular exosome;interstitial matrix;membrane-bounded organelle;membrane-bounded vesicle;organelle;proteinaceous extracellular matrix;vesicle	Protein digestion and absorption	B7ZNH7;K3W4R4	Collagen alpha-1(XIV) chain	Col14a1	+
1.6969	1.7705	1.5264	1.5344	1.63205	0.58399	0.6356	0.62055	0.67548	0.628905	62.01	38.61	0.62	-0.68	20.4207	20.0952	20.3732	18.8768	19.94	20.4672	20.5634	20.5826	19.8089	20.36	18.9023	18.7017	18.4434	19.245	18.82	17.9017	18.0914	17.7415	18.5987	18.08	biological adhesion;cell adhesion;cellular process	structural molecule activity	basement membrane;collagen;extracellular matrix part;extracellular membrane-bounded organelle;extracellular organelle;extracellular region part;extracellular space;extracellular vesicular exosome;membrane-bounded organelle;membrane-bounded vesicle;organelle;vesicle	Protein digestion and absorption	A2AJY2;O35206;A2AJY7	Collagen alpha-1(XV) chain;Restin	Col15a1	+
0.62559	0.56877	0.61476	0.9149	0.681005	0.3233	0.3135	0.34855	0.36725	0.33815	40.51	25.27	0.62	-0.68	19.0353	21.5376	20.9459	17.662	19.8	18.4663	20.828	20.0985	18.0485	19.36	20.9225	20.4252	19.9156	20.4995	20.44	19.4297	19.0392	18.8004	19.1687	19.11	anatomical structure development;anatomical structure morphogenesis;biological adhesion;biological regulation;biosynthetic process;blood vessel development;cell adhesion;cell migration;cell motility;cellular component movement;cellular component organization;cellular component organization at cellular level;cellular component organization or biogenesis;cellular component organization or biogenesi…	binding;carbohydrate binding;extracellular matrix structural constituent;glycoprotein binding;glycosaminoglycan binding;growth factor binding;heparin binding;pattern binding;platelet-derived growth factor binding;polysaccharide binding;protein binding;proteoglycan binding;structural molecule activity	basement membrane;collagen;collagen type V;extracellular matrix;extracellular matrix part;extracellular membrane-bounded organelle;extracellular organelle;extracellular region part;extracellular vesicular exosome;fibrillar collagen;membrane-bounded organelle;membrane-bounded vesicle;organelle;proteinaceous extracellular matrix;vesicle	Amoebiasis;ECM-receptor interaction;Focal adhesion;Protein digestion and absorption	O88207	Collagen alpha-1(V) chain	Col5a1	+
2.1732	3.0312	3.3389	2.7236	2.81672	0.9518	0.80954	0.74955	0.97427	0.87129	73.8	46.56	0.63	-0.66	21.1338	21.3512	20.7443	17.9968	20.31	22.7965	23.0269	22.6322	19.2759	21.93	22.9459	22.5125	22.6414	23.2643	22.84	22.4586	22.1166	22.404	22.7276	22.43	anatomical structure development;cartilage development;developmental process;endochondral ossification;multicellular organismal process;ossification;tissue development		cell cortex;cell part;collagen;cytoplasmic part;extracellular matrix;extracellular matrix part;extracellular region part;intracellular part;proteinaceous extracellular matrix		Q05306	Collagen alpha-1(X) chain	Col10a1	+
0.79223	0.92425	0.78842	1.0971	0.9005	0.49702	0.52139	0.53341	0.49074	0.51064	47.38	33.8	0.71	-0.49	23.2697	22.7524	22.4632	22.0747	22.64	22.8612	22.6013	22.3847	22.3847	22.56	21.9632	21.9156	21.4487	21.9845	21.83	20.7895	20.8513	20.5758	20.9029	20.78	anatomical structure development;anatomical structure homeostasis;anatomical structure morphogenesis;biological regulation;cartilage development;cell differentiation;cellular component organization;cellular component organization at cellular level;cellular component organization or biogenesis;cellular component organization or biogenesis at cellular level;cellular developmental process;cellular p…	binding;cation binding;extracellular matrix structural constituent;ion binding;metal ion binding;structural molecule activity	collagen;collagen type XI;extracellular matrix part;extracellular region part;fibrillar collagen	Amoebiasis;ECM-receptor interaction;Focal adhesion;Protein digestion and absorption	Q64739;I7HPY2	Collagen alpha-2(XI) chain	Col11a2	+
0.5347	0.66508	0.65304	0.77624	0.657265	0.32205	0.4657	0.46127	0.35003	0.399763	39.66	28.56	0.72	-0.47	21.7089	21.1817	20.8231	20.9246	21.16	20.4532	20.5143	20.024	20.782	20.44	20.965	20.1515	20.6322	20.7829	20.63	19.2812	18.6797	19.5417	18.9764	19.12	anatomical structure development;anatomical structure morphogenesis;cellular component organization;cellular component organization at cellular level;cellular component organization or biogenesis;cellular component organization or biogenesis at cellular level;cellular process;cellular response to acid;cellular response to amine stimulus;cellular response to amino acid stimulus;cellular response t…	binding;cation binding;extracellular matrix structural constituent;ion binding;metal ion binding;protein binding;SMAD binding;structural molecule activity	collagen;collagen type V;extracellular matrix;extracellular matrix part;extracellular region part;fibrillar collagen	Amoebiasis;ECM-receptor interaction;Focal adhesion;Protein digestion and absorption	Q3U962	Collagen alpha-2(V) chain	Col5a2	+
0.36389	0.46855	0.54888	0.60856	0.49747	0.32191	0.2928	0.41832	0.28645	0.32987	33.22	24.8	0.75	-0.42	24.5951	24.2822	24.0175	23.7856	24.17	22.94	22.9556	22.9833	22.9549	22.96	24.5566	22.8285	23.2096	23.3181	23.48	22.723	20.9936	21.9077	21.3337	21.74	aging;anatomical structure development;anatomical structure morphogenesis;aorta smooth muscle tissue morphogenesis;biological adhesion;biological regulation;blood vessel development;cell adhesion;cell surface receptor linked signaling pathway;cell-matrix adhesion;cell-substrate adhesion;cellular component organization;cellular component organization at cellular level;cellular component organizati…	binding;cation binding;extracellular matrix structural constituent;growth factor binding;integrin binding;ion binding;metal ion binding;platelet-derived growth factor binding;protein binding;protein complex binding;receptor binding;SMAD binding;structural molecule activity	collagen;collagen type III;extracellular matrix;extracellular matrix part;extracellular region part;extracellular space;fibrillar collagen;proteinaceous extracellular matrix	Amoebiasis;ECM-receptor interaction;Focal adhesion;Protein digestion and absorption	P08121	Collagen alpha-1(III) chain	Col3a1	+
0.589	0.74246	0.70113	0.83668	0.717317	0.39538	0.59333	0.4925	0.42689	0.477025	41.77	32.3	0.77	-0.37	28.9144	28.6137	28.4411	27.8841	28.46	28.6359	28.4324	28.3309	28.0646	28.37	27.7102	27.8878	27.6996	27.8867	27.8	26.5124	27.2015	26.8883	26.8359	26.86	anatomical structure development;anatomical structure formation involved in morphogenesis;anatomical structure homeostasis;anatomical structure morphogenesis;appendage morphogenesis;biological adhesion;biological regulation;bone development;cartilage condensation;cartilage development;cartilage development involved in endochondral bone morphogenesis;cell adhesion;cell differentiation;cell-cell ad…	binding;cation binding;extracellular matrix structural constituent;growth factor binding;identical protein binding;ion binding;metal ion binding;platelet-derived growth factor binding;protein binding;structural molecule activity	basement membrane;cell part;collagen;collagen type II;cytoplasm;extracellular matrix;extracellular matrix part;extracellular region part;extracellular space;fibrillar collagen;intracellular part;proteinaceous extracellular matrix	Amoebiasis;ECM-receptor interaction;Focal adhesion;Protein digestion and absorption	P28481	Collagen alpha-1(II) chain;Collagen alpha-1(II) chain;Chondrocalcin	Col2a1	+
0.53932	0.60143	0.5715	0.7078	0.605012	0.34509	0.50463	0.49573	0.37587	0.43033	37.7	30.09	0.8	-0.33	25.0861	24.5943	24.4553	23.9786	24.53	24.1323	23.9031	23.6312	23.7624	23.86	23.8767	23.3507	23.518	23.4581	23.55	22.4358	22.4242	22.5344	22.1827	22.39			anchoring collagen;collagen;collagen type IX;extracellular matrix;extracellular matrix part;extracellular region part;FACIT collagen;proteinaceous extracellular matrix	Protein digestion and absorption	I7HJR1;Q07643	Collagen alpha-2(IX) chain	Col9a2	+
0.36997	0.49869	0.50685	0.6779	0.513352	0.34305	0.44382	0.44516	0.28773	0.37994	33.92	27.53	0.81	-0.3	26.186	25.6419	25.3616	25.0784	25.57	24.8546	24.5648	24.1481	24.4155	24.5	24.6759	24.5721	24.3136	24.9847	24.64	22.969	23.394	23.0188	23.2963	23.17	anatomical structure development;anatomical structure homeostasis;biological regulation;cartilage development;cartilage development involved in endochondral bone morphogenesis;developmental process;growth plate cartilage development;homeostatic process;regulation of biological quality;tissue development;tissue homeostasis	binding;cation binding;ion binding;metal ion binding	anchoring collagen;collagen;collagen type IX;extracellular matrix;extracellular matrix part;extracellular region part;FACIT collagen;proteinaceous extracellular matrix	Protein digestion and absorption	G3X995;Q05722	Collagen alpha-1(IX) chain	Col9a1	+
0.31441	0.5875	0.37239	0.94197	0.554067	0.48744	0.32568	0.4439	0.41537	0.418098	35.65	29.48	0.83	-0.27	21.4259	21.1799	21.1781	20.2151	21	19.9204	19.7662	19.8828	19.3485	19.73	19.0259	20.3887	18.3751	20.2922	19.52	17.3036	18.7042	17.4544	18.3971	17.96	biological adhesion;biological regulation;cell adhesion;cell adhesion mediated by integrin;cellular component assembly;cellular component organization;cellular component organization or biogenesis;cellular process;cellular response to acid;cellular response to amine stimulus;cellular response to amino acid stimulus;cellular response to chemical stimulus;cellular response to endogenous stimulus;ce…	binding;integrin binding;protein binding;protein complex binding;receptor binding	collagen;extracellular matrix;extracellular matrix part;extracellular region part;proteinaceous extracellular matrix		Q8BLX7;A3KFV7	Collagen alpha-1(XVI) chain	Col16a1	+
0.32403	0.36929	0.38695	0.54232	0.405648	0.21711	0.37649	0.45144	0.24649	0.322882	28.86	24.41	0.85	-0.24	24.0956	24.2495	23.9071	23.6935	23.99	22.5376	23.0649	22.3327	22.8487	22.7	22.9834	22.6566	22.147	22.8245	22.65	20.637	21.1935	20.7811	20.5937	20.8	anatomical structure development;developmental process;developmental process involved in reproduction;female gonad development;gonad development;male gonad development;organ development;reproductive process;reproductive structure development		anchoring collagen;collagen;collagen type IX;extracellular matrix part;extracellular region part;FACIT collagen	Protein digestion and absorption	A2ACT7	Collagen, type IX, alpha 3	Col9a3	+
0.42342	0.4222	0.42591	0.52805	0.449895	0.32108	0.39507	0.41284	0.35874	0.371932	31.03	27.11	0.87	-0.19	26.1878	25.7762	25.5155	25.2911	25.69	24.6419	24.3151	24.1292	24.3251	24.35	25.4203	24.9258	23.3294	25.0326	24.68	23.8217	23.4754	21.5081	23.5737	23.09	biological adhesion;cell adhesion;cellular component assembly;cellular component organization;cellular component organization or biogenesis;cellular process;macromolecular complex assembly;macromolecular complex subunit organization;protein complex assembly;protein complex subunit organization;protein heterooligomerization;protein heterotrimerization;protein oligomerization;protein trimerization;…		cell part;collagen;extracellular matrix;extracellular matrix part;extracellular membrane-bounded organelle;extracellular organelle;extracellular region;extracellular region part;extracellular space;extracellular vesicular exosome;macromolecular complex;membrane;membrane-bounded organelle;membrane-bounded vesicle;organelle;plasma membrane;protein complex;proteinaceous extracellular matrix;sarcolem…	ECM-receptor interaction;Focal adhesion;Protein digestion and absorption	Q02788	Collagen alpha-2(VI) chain	Col6a2	+
0.42706	0.45634	0.4514	0.57786	0.478165	0.36656	0.41397	0.44527	0.39345	0.404813	32.35	28.82	0.89	-0.17	27.08	26.2038	26.5385	25.1277	26.24	25.8857	24.9549	24.6658	24.4145	24.98	25.3777	24.9275	24.7968	25.2346	25.08	23.9762	23.6831	23.6511	23.8832	23.8		endopeptidase inhibitor activity;endopeptidase regulator activity;enzyme inhibitor activity;enzyme regulator activity;peptidase inhibitor activity;peptidase regulator activity;serine-type endopeptidase inhibitor activity	cell part;collagen;extracellular matrix;extracellular matrix part;extracellular membrane-bounded organelle;extracellular organelle;extracellular region part;extracellular space;extracellular vesicular exosome;membrane;membrane-bounded organelle;membrane-bounded vesicle;organelle;plasma membrane;proteinaceous extracellular matrix;sarcolemma;vesicle	ECM-receptor interaction;Focal adhesion;Protein digestion and absorption	E9PWQ3;J3QQ16;A0A087WS16;D3YWD1	Collagen, type VI, alpha 3	Col6a3	+
0.25763	0.28112	0.31508	0.37532	0.307288	0.22177	0.29641	0.31729	0.22475	0.265055	23.51	20.95	0.89	-0.17	25.9655	25.3565	25.0815	24.6372	25.26	23.8668	23.3651	23.2585	23.1245	23.4	24.1197	23.9979	23.585	24.1502	23.96	21.7788	22.2733	21.683	21.8854	21.91	biological adhesion;cell adhesion;cell differentiation;cellular developmental process;cellular process;developmental process;endodermal cell differentiation		collagen;extracellular matrix;extracellular matrix part;extracellular membrane-bounded organelle;extracellular organelle;extracellular region part;extracellular space;extracellular vesicular exosome;membrane-bounded organelle;membrane-bounded vesicle;organelle;proteinaceous extracellular matrix;vesicle	Protein digestion and absorption	E9PX70;Q60847	Collagen alpha-1(XII) chain	Col12a1	+
0.36598	0.43144	0.39602	0.53127	0.431177	0.31152	0.37863	0.42653	0.36599	0.370668	30.13	27.04	0.9	-0.16	26.3448	25.4039	25.206	24.5753	25.38	24.688	23.6885	23.2959	22.8364	23.63	24.9126	24.6722	24.314	24.8994	24.7	22.6285	22.6839	22.1198	22.9314	22.59	biological adhesion;cell adhesion;cell differentiation;cellular component assembly;cellular component organization;cellular component organization or biogenesis;cellular developmental process;cellular process;cellular response to acid;cellular response to amine stimulus;cellular response to amino acid stimulus;cellular response to chemical stimulus;cellular response to endogenous stimulus;cellula…	binding;growth factor binding;platelet-derived growth factor binding;protein binding	cell part;collagen;cytoplasmic part;extracellular matrix;extracellular matrix part;extracellular membrane-bounded organelle;extracellular organelle;extracellular region;extracellular region part;extracellular vesicular exosome;intracellular organelle part;intracellular part;lysosomal membrane;macromolecular complex;membrane;membrane-bounded organelle;membrane-bounded vesicle;organelle;organelle m…	ECM-receptor interaction;Focal adhesion;Protein digestion and absorption	Q04857	Collagen alpha-1(VI) chain	Col6a1	+
19.262	9.1919	8.9831	9.9827	11.8549	0.12013	0.06582	0.06582	0.01034	0.0655275	92.44	9.75	0.11	-3.24	NaN	NaN	NaN	NaN	NaN	NaN	22.2926	22.1683	NaN	22.23	NaN	21.3675	NaN	21.815	21.59	NaN	NaN	NaN	NaN	NaN	biosynthetic process;cell differentiation;cellular biosynthetic process;cellular component assembly;cellular component assembly at cellular level;cellular component biogenesis;cellular component biogenesis at cellular level;cellular component organization;cellular component organization at cellular level;cellular component organization or biogenesis;cellular component organization or biogenesis a…	structural constituent of ribosome;structural molecule activity	adherens junction;anchoring junction;cell junction;cell part;cell-substrate adherens junction;cell-substrate junction;cytoplasm;cytosolic small ribosomal subunit;focal adhesion;intracellular organelle part;intracellular part;macromolecular complex;membrane;organelle part;ribonucleoprotein complex;small ribosomal subunit	Ribosome	D3YTQ9;P62843	40S ribosomal protein S15	Rps15
3.399	9.1919	8.9831	9.9827	7.88917	0.12013	0.06582	0.06582	0.01034	0.0655275	92.44	9.75	0.11	-3.24	19.4259	NaN	NaN	NaN	NaN	22.0258	20.1741	18.3258	21.3961	20.48	NaN	19.5164	NaN	19.351	19.43	NaN	NaN	NaN	NaN	NaN			cell part;cytoplasmic part;endoplasmic reticulum;endoplasmic reticulum membrane;endoplasmic reticulum part;integral to membrane;intracellular membrane-bounded organelle;intracellular organelle;intracellular organelle part;intracellular part;intrinsic to membrane;membrane;membrane part;membrane-bounded organelle;organelle;organelle membrane;organelle part	Protein processing in endoplasmic reticulum	Q9CY50	Translocon-associated protein subunit alpha	Ssr1
19.262	9.1919	8.9831	2.4752	9.97805	0.12013	0.06582	0.06582	0.01034	0.0655275	92.44	9.75	0.11	-3.24	NaN	NaN	NaN	16.0956	NaN	21.8159	19.1412	20.8527	19.3166	20.28	NaN	18.3805	NaN	18.9922	18.69	NaN	NaN	NaN	NaN	NaN	amine biosynthetic process;amine metabolic process;biosynthetic process;carboxylic acid biosynthetic process;carboxylic acid metabolic process;cellular amine metabolic process;cellular amino acid biosynthetic process;cellular amino acid metabolic process;cellular biosynthetic process;cellular component assembly;cellular component organization;cellular component organization or biogenesis;cellular…	binding;catalytic activity;cofactor binding;ornithine-oxo-acid transaminase activity;pyridoxal phosphate binding;transaminase activity;transferase activity;transferase activity, transferring nitrogenous groups;vitamin B6 binding;vitamin binding	cell part;cytoplasmic part;intracellular membrane-bounded organelle;intracellular organelle;intracellular organelle lumen;intracellular organelle part;intracellular part;membrane-bounded organelle;membrane-enclosed lumen;mitochondrial matrix;mitochondrial part;mitochondrion;organelle;organelle lumen;organelle part	Arginine and proline metabolism	P29758	Ornithine aminotransferase, mitochondrial	Oat
19.262	9.1919	8.9831	9.9827	11.8549	0.12013	0.06582	0.06582	0.01034	0.0655275	92.44	9.75	0.11	-3.24	NaN	NaN	NaN	NaN	NaN	20.6454	20.2176	20.2688	19.5698	20.18	18.5712	19.0339	18.845	19.7175	19.04	NaN	NaN	NaN	NaN	NaN	anatomical structure morphogenesis;apoptosis;biological regulation;biosynthetic process;cell death;cell part morphogenesis;cell projection morphogenesis;cell projection organization;cellular biosynthetic process;cellular component morphogenesis;cellular component movement;cellular component organization;cellular component organization at cellular level;cellular component organization or biogenesi…	binding;catalytic activity;enzyme inhibitor activity;enzyme regulator activity;hydrolase activity;hydrolase activity, acting on acid anhydrides;hydrolase activity, acting on acid anhydrides, in phosphorus-containing anhydrides;motor activity;nitric-oxide synthase regulator activity;nucleoside-triphosphatase activity;protein binding;protein C-terminus binding;protein domain specific binding;pyroph…	cell part;centrosome;chromosomal part;cytoplasm;cytoplasmic dynein complex;cytoplasmic part;cytoskeletal part;cytoskeleton;cytosol;dynein complex;extracellular membrane-bounded organelle;extracellular organelle;extracellular region part;extracellular vesicular exosome;intracellular membrane-bounded organelle;intracellular non-membrane-bounded organelle;intracellular organelle;intracellular organe…	Vasopressin-regulated water reabsorption	P63168	Dynein light chain 1, cytoplasmic	Dynll1
19.262	9.1919	8.9831	9.9827	11.8549	0.12013	0.35032	0.06582	0.01034	0.136653	92.44	9.75	0.11	-3.24	NaN	NaN	NaN	NaN	NaN	20.1671	20.0266	NaN	NaN	20.1	NaN	18.4711	NaN	NaN	NaN	NaN	17.1803	NaN	17.018	17.1	activation of MAPKK activity;activation of protein kinase activity;aging;amine metabolic process;aminoglycan catabolic process;aminoglycan metabolic process;anatomical structure development;anatomical structure formation involved in morphogenesis;anatomical structure morphogenesis;angiogenesis;angiogenesis involved in coronary vascular morphogenesis;biological regulation;biosynthetic process;bloo…	binding;carbohydrate binding;chemoattractant activity;cytokine activity;fibroblast growth factor receptor binding;glycosaminoglycan binding;growth factor activity;growth factor receptor binding;heparin binding;ligand-dependent nuclear receptor transcription coactivator activity;pattern binding;polysaccharide binding;protein binding;protein binding transcription factor activity;receptor binding;tr…	cell part;cytoplasm;extracellular region part;extracellular space;intracellular membrane-bounded organelle;intracellular organelle;intracellular part;membrane-bounded organelle;nucleus;organelle	MAPK signaling pathway;Melanoma;Pathways in cancer;Regulation of actin cytoskeleton	P15655;Q925A1;Q925A2	Fibroblast growth factor 2;Fibroblast growth factor	Fgf2
19.262	9.1919	8.9831	9.9827	11.8549	0.12013	0.06582	0.06582	0.01034	0.0655275	92.44	9.75	0.11	-3.24	NaN	NaN	NaN	NaN	NaN	21.003	19.665	19.779	19.1365	19.9	NaN	17.4012	NaN	18.3144	17.86	NaN	NaN	NaN	NaN	NaN	ATP-dependent chromatin remodeling;biological regulation;biosynthetic process;cell cycle;cellular biosynthetic process;cellular component assembly;cellular component assembly at cellular level;cellular component organization;cellular component organization at cellular level;cellular component organization or biogenesis;cellular component organization or biogenesis at cellular level;cellular heat …	ATPase activity;ATPase activity, coupled;binding;catalytic activity;core promoter proximal region DNA binding;core promoter proximal region sequence-specific DNA binding;DNA binding;DNA-dependent ATPase activity;enhancer binding;enhancer sequence-specific DNA binding;enzyme binding;histone deacetylase binding;hydrolase activity;hydrolase activity, acting on acid anhydrides;hydrolase activity, act…	CAF-1 complex;cell part;chromatin;chromatin assembly complex;chromatin remodeling complex;chromosomal part;ESC/E(Z) complex;histone deacetylase complex;histone methyltransferase complex;intracellular membrane-bounded organelle;intracellular organelle;intracellular organelle part;intracellular part;ISWI complex;macromolecular complex;membrane-bounded organelle;methyltransferase complex;nuclear chr…		Q60972;A2AFI9;A2AFJ1;Q60973	Histone-binding protein RBBP4;Histone-binding protein RBBP7	Rbbp4;Rbbp7
19.262	9.1919	8.9831	9.9827	11.8549	0.12013	0.06582	0.06582	0.01034	0.0655275	92.44	9.75	0.11	-3.24	NaN	NaN	NaN	NaN	NaN	NaN	19.6847	18.6386	20.7717	19.7	19.7429	19.0916	20.181	NaN	19.67	NaN	NaN	NaN	NaN	NaN	ATP-dependent chromatin remodeling;biological regulation;cellular component organization;cellular component organization at cellular level;cellular component organization or biogenesis;cellular component organization or biogenesis at cellular level;cellular macromolecular complex subunit organization;cellular process;chromatin modification;chromatin organization;chromatin remodeling;chromosome or…	binding;enzyme inhibitor activity;enzyme regulator activity;histone binding;phosphatase inhibitor activity;phosphatase regulator activity;protein binding	cell part;chromatin remodeling complex;chromosomal part;cytoplasm;cytoplasmic membrane-bounded vesicle;cytoplasmic part;cytoplasmic vesicle;intracellular membrane-bounded organelle;intracellular organelle;intracellular organelle part;intracellular part;macromolecular complex;membrane-bounded organelle;membrane-bounded vesicle;nuclear chromosome part;nuclear part;nucleus;organelle;organelle part;p…		E9Q5H2;E9PZF5;P97822	Acidic leucine-rich nuclear phosphoprotein 32 family member E	Anp32e
19.262	9.1919	8.9831	9.9827	11.8549	0.12013	0.06582	0.06582	0.01034	0.0655275	92.44	9.75	0.11	-3.24	NaN	NaN	NaN	NaN	NaN	NaN	NaN	20.0543	18.8048	19.43	NaN	17.786	NaN	18.9442	18.37	NaN	NaN	NaN	NaN	NaN	anatomical structure development;anatomical structure morphogenesis;biological regulation;biosynthetic process;cardiac chamber development;cardiac ventricle development;cell migration;cell motility;cellular biosynthetic process;cellular component movement;cellular macromolecule biosynthetic process;cellular macromolecule metabolic process;cellular metabolic process;cellular nitrogen compound meta…	binding;DNA binding;nucleic acid binding;protein binding;protein binding transcription factor activity;TBP-class protein binding;transcription coactivator activity;transcription cofactor activity;transcription factor binding;transcription factor binding transcription factor activity	cell part;cytoplasm;extracellular membrane-bounded organelle;extracellular organelle;extracellular region part;extracellular vesicular exosome;intracellular membrane-bounded organelle;intracellular organelle;intracellular part;membrane-bounded organelle;membrane-bounded vesicle;nucleus;organelle;vesicle		Q60817;P70670	Nascent polypeptide-associated complex subunit alpha;Nascent polypeptide-associated complex subunit alpha, muscle-specific form	Naca
19.262	9.1919	8.9831	9.9827	11.8549	0.33833	0.06582	0.06582	0.01034	0.120078	92.44	9.75	0.11	-3.24	NaN	NaN	NaN	NaN	NaN	NaN	17.6211	21.269	18.9521	19.28	19.5403	17.6245	NaN	18.0031	18.39	15.7811	NaN	NaN	NaN	NaN	anatomical structure morphogenesis;apoptotic mitochondrial changes;autophagy;biological regulation;calcium ion homeostasis;calcium-mediated signaling;calcium-mediated signaling using intracellular calcium source;catabolic process;cation homeostasis;cell part morphogenesis;cellular calcium ion homeostasis;cellular catabolic process;cellular cation homeostasis;cellular chemical homeostasis;cellular…	binding;protein binding;receptor binding	cell part;cytoplasmic part;integral to membrane;integral to mitochondrial membrane;integral to mitochondrial outer membrane;integral to organelle membrane;integral to peroxisomal membrane;intracellular membrane-bounded organelle;intracellular organelle;intracellular organelle part;intracellular part;intrinsic to membrane;intrinsic to mitochondrial outer membrane;intrinsic to organelle membrane;in…		Q9CQ92;G3X9U9	Mitochondrial fission 1 protein	Fis1
19.262	9.1919	8.9831	9.9827	11.8549	0.12013	0.06582	0.06582	0.41807	0.16746	92.44	9.75	0.11	-3.24	NaN	NaN	NaN	NaN	NaN	18.7388	NaN	NaN	19.6183	19.18	NaN	16.2827	NaN	16.7106	16.5	NaN	NaN	NaN	15.5148	NaN	biological regulation;cellular component organization;cellular component organization or biogenesis;cellular macromolecule metabolic process;cellular membrane organization;cellular metabolic process;cellular process;cellular response to stimulus;early endosome to late endosome transport;endocytosis;endosome transport;establishment of localization;establishment of localization in cell;establishmen…	binding;catalytic activity;GDP binding;GTP binding;GTPase activity;guanyl nucleotide binding;guanyl ribonucleotide binding;hydrolase activity;hydrolase activity, acting on acid anhydrides;hydrolase activity, acting on acid anhydrides, in phosphorus-containing anhydrides;nucleoside-triphosphatase activity;nucleotide binding;purine nucleotide binding;purine ribonucleoside triphosphate binding;purin…	actin cytoskeleton;axon;axon part;axon terminus;cell body;cell part;cell projection;cell projection part;clathrin-coated vesicle;coated vesicle;cytoplasm;cytoplasmic membrane-bounded vesicle;cytoplasmic part;cytoplasmic vesicle;cytoplasmic vesicle membrane;cytoplasmic vesicle part;cytoskeleton;cytosol;dendrite;early endosome;endocytic vesicle;endosome;extracellular membrane-bounded organelle;extr…	Amoebiasis;Amyotrophic lateral sclerosis (ALS);Endocytosis;ko05152;Phagosome;Vasopressin-regulated water reabsorption	Q9CQD1	Ras-related protein Rab-5A	Rab5a
4.4664	9.1919	8.9831	9.9827	8.15602	0.12013	0.31335	0.06582	0.01034	0.12741	92.44	9.75	0.11	-3.24	17.4612	NaN	NaN	NaN	NaN	19.7669	18.66	NaN	18.7832	19.07	17.1075	17.2199	NaN	17.4231	17.25	NaN	15.6482	NaN	NaN	NaN	anatomical structure development;anatomical structure morphogenesis;behavior;biological regulation;blood coagulation;cellular component organization;cellular component organization at cellular level;cellular component organization or biogenesis;cellular component organization or biogenesis at cellular level;cellular process;cerebellar granular layer morphogenesis;coagulation;detection of abiotic …	binding;carbohydrate binding;endopeptidase inhibitor activity;endopeptidase regulator activity;enzyme inhibitor activity;enzyme regulator activity;glycosaminoglycan binding;heparin binding;pattern binding;peptidase inhibitor activity;peptidase regulator activity;polysaccharide binding;protein binding;receptor binding;serine-type endopeptidase inhibitor activity	cell part;cytoplasmic membrane-bounded vesicle;cytoplasmic part;cytoplasmic vesicle;cytosol;extracellular matrix;extracellular region;extracellular region part;extracellular space;extrinsic to external side of plasma membrane;extrinsic to membrane;extrinsic to plasma membrane;intracellular membrane-bounded organelle;intracellular organelle;intracellular part;membrane part;membrane-bounded organel…	Amoebiasis	Q07235;A0A087WQ70;A0A087WQM1	Glia-derived nexin	Serpine2
19.262	9.1919	8.9831	9.9827	11.8549	0.12013	0.06582	0.06582	0.01034	0.0655275	92.44	9.75	0.11	-3.24	NaN	NaN	NaN	NaN	NaN	19.2819	NaN	18.8028	NaN	19.04	17.326	18.2768	17.842	NaN	17.81	NaN	NaN	NaN	NaN	NaN	acylglycerol catabolic process;acylglycerol metabolic process;alcohol metabolic process;biological regulation;carbohydrate homeostasis;catabolic process;cell surface receptor linked signaling pathway;cellular catabolic process;cellular chemical homeostasis;cellular component organization;cellular component organization or biogenesis;cellular glucose homeostasis;cellular homeostasis;cellular lipid…	binding;enzyme inhibitor activity;enzyme regulator activity;lipase inhibitor activity;lipid binding;phospholipid binding	cell part;chylomicron;cytoplasmic part;cytosol;extracellular membrane-bounded organelle;extracellular organelle;extracellular region;extracellular region part;extracellular vesicular exosome;high-density lipoprotein particle;intermediate-density lipoprotein particle;intracellular part;macromolecular complex;membrane-bounded organelle;membrane-bounded vesicle;organelle;plasma lipoprotein particle;…	PPAR signaling pathway	E9QP56;P33622	Apolipoprotein C-III	Apoc3
19.262	9.1919	8.9831	9.9827	11.8549	0.12013	0.06582	0.06582	0.01034	0.0655275	92.44	9.75	0.11	-3.24	NaN	NaN	NaN	NaN	NaN	NaN	19.1438	19.2444	18.3975	18.93	NaN	16.9863	18.2167	NaN	17.6	NaN	NaN	NaN	NaN	NaN	metabolic process;oxidation-reduction process		cell part;cytoplasmic part;integral to membrane;intracellular membrane-bounded organelle;intracellular organelle;intracellular organelle part;intracellular part;intrinsic to membrane;macromolecular complex;membrane part;membrane-bounded organelle;mitochondrial membrane part;mitochondrial part;mitochondrial respiratory chain complex I;mitochondrion;NADH dehydrogenase complex;organelle;organelle pa…	Alzheimer's disease;Huntington's disease;Oxidative phosphorylation;Parkinson's disease	O09111	NADH dehydrogenase [ubiquinone] 1 beta subcomplex subunit 11, mitochondrial	Ndufb11
19.262	3.698	8.9831	9.9827	10.4815	0.21131	0.06582	0.06582	0.01034	0.0883225	92.44	9.75	0.11	-3.24	NaN	16.7267	NaN	NaN	NaN	NaN	18.6855	NaN	19.169	18.93	19.1264	18.612	18.3317	NaN	18.69	17.1122	NaN	NaN	NaN	NaN	autophagy;behavior;behavioral interaction between organisms;biological regulation;calcium ion homeostasis;catabolic process;cation homeostasis;cell differentiation;cell proliferation;cell volume homeostasis;cellular calcium ion homeostasis;cellular catabolic process;cellular cation homeostasis;cellular chemical homeostasis;cellular component organization;cellular component organization or biogene…	binding;calcium ion binding;calcium-dependent phospholipid binding;calcium-dependent protein binding;cation binding;integrin binding;ion binding;lipid binding;metal ion binding;phospholipid binding;protein binding;protein complex binding;receptor binding	cell part;chromaffin granule membrane;cytoplasmic part;cytoplasmic vesicle membrane;cytoplasmic vesicle part;cytosol;endoplasmic reticulum membrane;endoplasmic reticulum part;envelope;extracellular membrane-bounded organelle;extracellular organelle;extracellular region part;extracellular vesicular exosome;intracellular membrane-bounded organelle;intracellular organelle;intracellular organelle par…		Q07076	Annexin A7	Anxa7
19.262	9.1919	8.9831	9.9827	11.8549	0.12013	0.06582	0.06582	0.01034	0.0655275	92.44	9.75	0.11	-3.24	NaN	NaN	NaN	NaN	NaN	19.7282	18.2468	18.7681	NaN	18.91	16.8531	NaN	NaN	19.1061	17.98	NaN	NaN	NaN	NaN	NaN	bleb assembly;catabolic process;cell projection assembly;cell projection organization;cellular catabolic process;cellular component assembly;cellular component assembly at cellular level;cellular component organization;cellular component organization at cellular level;cellular component organization or biogenesis;cellular component organization or biogenesis at cellular level;cellular lipid catab…	antioxidant activity;carboxylic ester hydrolase activity;catalytic activity;glutathione peroxidase activity;hydrolase activity;hydrolase activity, acting on ester bonds;lipase activity;oxidoreductase activity;oxidoreductase activity, acting on paired donors, with incorporation or reduction of molecular oxygen;oxidoreductase activity, acting on peroxide as acceptor;peroxidase activity;peroxiredoxi…	cell part;cytoplasm;cytoplasmic membrane-bounded vesicle;cytoplasmic part;cytoplasmic vesicle;cytosol;extracellular membrane-bounded organelle;extracellular organelle;extracellular region part;extracellular space;extracellular vesicular exosome;intracellular membrane-bounded organelle;intracellular organelle;intracellular part;lysosome;lytic vacuole;membrane;membrane-bounded organelle;membrane-bo…	Methane metabolism;Phenylalanine metabolism;Phenylpropanoid biosynthesis	Q6GT24;D3Z0Y2;O08709	Peroxiredoxin-6	Prdx6
19.262	9.1919	8.9831	9.9827	11.8549	0.12013	0.06582	0.06582	0.01034	0.0655275	92.44	9.75	0.11	-3.24	NaN	NaN	16.8013	NaN	NaN	NaN	NaN	19.0334	18.5124	18.77	18.1773	NaN	NaN	17.1301	17.65	NaN	NaN	NaN	NaN	NaN	biological regulation;biosynthetic process;cell differentiation;cellular biosynthetic process;cellular component assembly;cellular component organization;cellular component organization or biogenesis;cellular developmental process;cellular macromolecule biosynthetic process;cellular macromolecule metabolic process;cellular metabolic process;cellular nitrogen compound metabolic process;cellular pr…	binding;chromatin binding;core promoter binding;DNA binding;mRNA binding;nucleic acid binding;nucleotide binding;regulatory region DNA binding;regulatory region nucleic acid binding;RNA binding;transcription regulatory region DNA binding	catalytic step 2 spliceosome;cell part;chromatin;chromosomal part;euchromatin;extracellular membrane-bounded organelle;extracellular organelle;extracellular region part;extracellular space;extracellular vesicular exosome;intracellular membrane-bounded organelle;intracellular organelle;intracellular organelle part;intracellular part;macromolecular complex;membrane;membrane-bounded organelle;membra…	Spliceosome	A2AFI3;Q91VM5;Q9WV02;A2AFI4	RNA binding motif protein, X-linked-like-1;RNA-binding motif protein, X chromosome;RNA-binding motif protein, X chromosome, N-terminally processed	Rbmx;Rbmxl1
19.262	9.1919	8.9831	9.9827	11.8549	0.12013	0.06582	0.06582	0.01034	0.0655275	92.44	9.75	0.11	-3.24	NaN	NaN	NaN	NaN	NaN	NaN	17.0284	18.678	18.9502	18.22	NaN	15.7554	NaN	19.1092	17.43	NaN	NaN	NaN	NaN	NaN	anatomical structure morphogenesis;biological regulation;cellular macromolecule metabolic process;cellular metabolic process;cellular nitrogen compound metabolic process;cellular process;developmental process;macromolecule metabolic process;metabolic process;nitrogen compound metabolic process;nucleic acid metabolic process;nucleobase-containing compound metabolic process;organ morphogenesis;orga…	adenyl nucleotide binding;adenyl ribonucleotide binding;ATP binding;ATPase activity;ATPase activity, coupled;ATP-dependent helicase activity;ATP-dependent RNA helicase activity;binding;catalytic activity;double-stranded RNA binding;helicase activity;hydrolase activity;hydrolase activity, acting on acid anhydrides;hydrolase activity, acting on acid anhydrides, in phosphorus-containing anhydrides;n…	cell part;cytoplasm;extracellular membrane-bounded organelle;extracellular organelle;extracellular region part;extracellular vesicular exosome;intracellular non-membrane-bounded organelle;intracellular organelle;intracellular organelle part;intracellular part;membrane;membrane-bounded organelle;membrane-bounded vesicle;non-membrane-bounded organelle;nuclear part;nucleolus;organelle;organelle part…	RNA transport	P60843	Eukaryotic initiation factor 4A-I	Eif4a1
19.262	9.1919	3.1132	9.9827	10.3874	0.33742	0.06582	0.06582	0.01034	0.11985	92.44	9.75	0.11	-3.24	NaN	NaN	16.3707	NaN	NaN	18.5506	18.3876	18.1234	17.7214	18.2	15.9686	NaN	NaN	17.5741	16.77	14.7618	NaN	NaN	NaN	NaN	biological regulation;metabolic process;negative regulation of anoikis;negative regulation of apoptosis;negative regulation of biological process;negative regulation of cell death;negative regulation of cellular process;negative regulation of gene expression;negative regulation of macromolecule metabolic process;negative regulation of metabolic process;negative regulation of programmed cell death…	aminoacyl-tRNA hydrolase activity;carboxylic ester hydrolase activity;catalytic activity;hydrolase activity;hydrolase activity, acting on ester bonds	cell part;cytoplasmic part;cytosol;intracellular membrane-bounded organelle;intracellular organelle;intracellular part;membrane;membrane-bounded organelle;mitochondrion;organelle		Q8R2Y8	Peptidyl-tRNA hydrolase 2, mitochondrial	Ptrh2
19.262	9.1919	8.9831	9.9827	11.8549	0.12013	0.06582	0.06582	0.01034	0.0655275	92.44	9.75	0.11	-3.24	NaN	NaN	NaN	NaN	NaN	18.4888	17.5656	NaN	NaN	18.03	NaN	16.3801	NaN	16.682	16.53	NaN	NaN	NaN	NaN	NaN	anatomical structure development;calcium ion-dependent exocytosis;cell differentiation;cellular developmental process;cellular process;cerebellum development;developmental process;establishment of localization;establishment of localization in cell;exocytosis;fat cell differentiation;response to abiotic stimulus;response to chemical stimulus;response to ethanol;response to light stimulus;response …	binding;calcium ion binding;cation binding;ion binding;metal ion binding	cell part;cytoplasmic part;endosome;extracellular membrane-bounded organelle;extracellular organelle;extracellular region part;extracellular vesicular exosome;Golgi apparatus;Golgi apparatus part;Golgi lumen;intracellular membrane-bounded organelle;intracellular organelle;intracellular organelle lumen;intracellular organelle part;intracellular part;late endosome;membrane;membrane-bounded organell…		Q61112	45 kDa calcium-binding protein	Sdf4
19.262	9.1919	3.4397	9.9827	10.4691	0.12013	0.06582	0.06582	0.01034	0.0655275	92.44	9.75	0.11	-3.24	NaN	NaN	15.0232	NaN	NaN	18.8521	18.7208	17.3989	17.0805	18.01	16.8368	NaN	NaN	16.1507	16.49	NaN	NaN	NaN	NaN	NaN	biological regulation;biosynthetic process;cellular biosynthetic process;cellular macromolecule biosynthetic process;cellular macromolecule metabolic process;cellular metabolic process;cellular nitrogen compound metabolic process;cellular process;cellular response to stimulus;cellular response to stress;developmental process;DNA conformation change;DNA duplex unwinding;DNA geometric change;DNA me…	adenyl nucleotide binding;adenyl ribonucleotide binding;ATP binding;ATPase activity;ATPase activity, coupled;ATP-dependent helicase activity;ATP-dependent RNA helicase activity;binding;catalytic activity;chromatin binding;DNA binding;DNA/RNA helicase activity;double-stranded RNA binding;exonuclease activity;helicase activity;hydrolase activity;hydrolase activity, acting on acid anhydrides;hydrola…	cell part;cleavage body;cytoplasm;cytoplasmic part;intracellular membrane-bounded organelle;intracellular non-membrane-bounded organelle;intracellular organelle;intracellular organelle part;intracellular part;macromolecular complex;membrane;membrane-bounded organelle;non-membrane-bounded organelle;nuclear body;nuclear part;nucleolus;nucleoplasm;nucleoplasm part;nucleus;organelle;organelle part;pr…		Q91VR5	ATP-dependent RNA helicase DDX1	Ddx1
19.262	9.1919	8.9831	2.1578	9.8987	0.12013	0.06582	0.18083	0.01034	0.09428	92.44	9.75	0.11	-3.24	NaN	NaN	NaN	15.8163	NaN	18.3873	18.1943	17.5883	17.0738	17.81	16.2371	16.236	15.8718	14.5743	15.73	NaN	NaN	15.2313	NaN	NaN	anatomical structure development;biological regulation;calcineurin-NFAT signaling pathway;calcium ion transport;calcium-mediated signaling;carbohydrate homeostasis;cardiac muscle adaptation;cardiac muscle hypertrophy;cardiac muscle hypertrophy in response to stress;cation transport;cell cycle process;cell development;cellular chemical homeostasis;cellular developmental process;cellular glucose ho…	binding;calcium-dependent protein serine/threonine phosphatase activity;calmodulin binding;calmodulin-dependent protein phosphatase activity;catalytic activity;cation binding;drug binding;enzyme binding;hydrolase activity;hydrolase activity, acting on ester bonds;ion binding;metal ion binding;phosphatase activity;phosphoprotein phosphatase activity;phosphoric ester hydrolase activity;protein bind…	calcineurin complex;cell part;contractile fiber part;cytoplasm;cytoplasmic part;cytosol;intracellular membrane-bounded organelle;intracellular organelle;intracellular organelle part;intracellular part;macromolecular complex;membrane;membrane-bounded organelle;mitochondrion;nuclear part;nucleoplasm;nucleus;organelle;organelle part;plasma membrane;protein complex;protein serine/threonine phosphatas…	Alzheimer's disease;Amyotrophic lateral sclerosis (ALS);Apoptosis;Axon guidance;B cell receptor signaling pathway;Calcium signaling pathway;ko05152;Long-term potentiation;MAPK signaling pathway;Natural killer cell mediated cytotoxicity;Oocyte meiosis;Osteoclast differentiation;T cell receptor signaling pathway;VEGF signaling pathway;Wnt signaling pathway	P63328	Serine/threonine-protein phosphatase 2B catalytic subunit alpha isoform	Ppp3ca
19.262	9.1919	8.9831	9.9827	11.8549	0.12013	0.06582	0.06582	0.01034	0.0655275	92.44	9.75	0.11	-3.24	NaN	NaN	NaN	NaN	NaN	NaN	NaN	NaN	NaN	17.78	NaN	NaN	NaN	NaN	16.59	NaN	NaN	NaN	NaN	NaN	cell cycle;cell division;cellular component assembly;cellular component organization;cellular component organization or biogenesis;cellular process;macromolecular complex assembly;macromolecular complex subunit organization;protein complex assembly;protein complex subunit organization;protein heterooligomerization;protein oligomerization	binding;GTP binding;guanyl nucleotide binding;guanyl ribonucleotide binding;nucleotide binding;purine nucleotide binding;purine ribonucleoside triphosphate binding;purine ribonucleotide binding;ribonucleotide binding	actin cytoskeleton;actin filament bundle;actomyosin;cell part;cytoplasmic part;cytoskeletal part;cytoskeleton;intracellular non-membrane-bounded organelle;intracellular organelle;intracellular organelle part;intracellular part;macromolecular complex;microtubule;non-membrane-bounded organelle;organelle;organelle part;perinuclear region of cytoplasm;protein complex;stress fiber		A2A6U5;A2A6U3;Q80UG5;A8Y5D3	Septin-9	Septin9
19.262	9.1919	8.9831	9.9827	11.8549	0.12013	0.06582	0.06582	0.18625	0.109505	92.44	9.75	0.11	-3.24	NaN	NaN	NaN	NaN	NaN	17.6839	NaN	17.9456	17.3729	17.67	15.8656	16.4955	15.007	17.9689	16.33	NaN	NaN	NaN	14.7588	NaN	binding of sperm to zona pellucida;cell recognition;cell-cell recognition;cellular component assembly;cellular component assembly at cellular level;cellular component organization;cellular component organization at cellular level;cellular component organization or biogenesis;cellular component organization or biogenesis at cellular level;cellular macromolecule metabolic process;cellular metabolic…	adenyl nucleotide binding;adenyl ribonucleotide binding;ATP binding;binding;nucleotide binding;purine nucleotide binding;purine ribonucleoside triphosphate binding;purine ribonucleotide binding;ribonucleotide binding	cell body;cell part;chaperonin-containing T-complex;cytoplasm;cytoplasmic part;cytoskeletal part;cytosolic part;extracellular membrane-bounded organelle;extracellular organelle;extracellular region part;extracellular vesicular exosome;intracellular organelle part;intracellular part;macromolecular complex;membrane;membrane-bounded organelle;membrane-bounded vesicle;microtubule;myelin sheath;organe…		P80318;E9Q133;Q3U0I3	T-complex protein 1 subunit gamma	Cct3
19.262	9.1919	2.8183	9.9827	10.3137	0.12013	0.06582	0.06582	0.01034	0.0655275	92.44	9.75	0.11	-3.24	NaN	NaN	15.1682	NaN	NaN	NaN	NaN	17.4405	17.7346	17.59	NaN	16.6716	NaN	17.0859	16.88	NaN	NaN	NaN	NaN	NaN	apoptosis;biological regulation;biosynthetic process;cell death;cell differentiation;cellular biosynthetic process;cellular developmental process;cellular macromolecule biosynthetic process;cellular macromolecule metabolic process;cellular metabolic process;cellular process;cellular protein metabolic process;death;developmental process;epithelial cell differentiation;lung cell differentiation;lun…		cell part;cytoplasmic part;cytosol;intracellular membrane-bounded organelle;intracellular organelle;intracellular part;membrane;membrane-bounded organelle;nucleus;organelle		Q8R3V2;Q8R010	Aminoacyl tRNA synthase complex-interacting multifunctional protein 2	Aimp2
19.262	9.1919	8.9831	1.39	9.70675	0.12013	0.06582	0.06582	0.42385	0.168905	92.44	9.75	0.11	-3.24	NaN	NaN	NaN	16.624	NaN	17.7362	NaN	NaN	17.4012	17.57	NaN	14.6503	NaN	17.6533	16.15	NaN	NaN	NaN	16.3806	NaN	2-oxoglutarate metabolic process;acetyl-CoA catabolic process;acetyl-CoA metabolic process;carboxylic acid metabolic process;catabolic process;cellular catabolic process;cellular ketone metabolic process;cellular metabolic process;cellular nitrogen compound metabolic process;cellular process;coenzyme catabolic process;coenzyme metabolic process;cofactor catabolic process;cofactor metabolic proces…	binding;catalytic activity;cation binding;coenzyme binding;cofactor binding;ion binding;isocitrate dehydrogenase (NAD+) activity;isocitrate dehydrogenase activity;magnesium ion binding;metal ion binding;NAD binding;nucleotide binding;oxidoreductase activity;oxidoreductase activity, acting on CH-OH group of donors;oxidoreductase activity, acting on the CH-OH group of donors, NAD or NADP as acceptor	cell part;cytoplasmic part;intracellular membrane-bounded organelle;intracellular organelle;intracellular part;membrane-bounded organelle;mitochondrion;nucleus;organelle	Citrate cycle (TCA cycle)	Q91VA7	Isocitrate dehydrogenase [NAD] subunit, mitochondrial	Idh3b
19.262	9.1919	8.9831	9.9827	11.8549	0.12013	0.06582	0.06582	0.01034	0.0655275	92.44	9.75	0.11	-3.24	NaN	NaN	NaN	NaN	NaN	15.4857	19.5984	NaN	NaN	17.54	NaN	NaN	15.1164	15.375	15.25	NaN	NaN	NaN	NaN	NaN	catabolic process;cellular catabolic process;cellular macromolecule catabolic process;cellular macromolecule metabolic process;cellular metabolic process;cellular process;macromolecule catabolic process;macromolecule metabolic process;metabolic process;modification-dependent macromolecule catabolic process;modification-dependent protein catabolic process;primary metabolic process;proteasomal prot…		cell part;extracellular membrane-bounded organelle;extracellular organelle;extracellular region part;extracellular vesicular exosome;intracellular part;macromolecular complex;membrane-bounded organelle;membrane-bounded vesicle;organelle;proteasome accessory complex;proteasome complex;proteasome regulatory particle;protein complex;vesicle	Proteasome	Q99JI4	26S proteasome non-ATPase regulatory subunit 6	Psmd6
19.262	9.1919	8.9831	9.9827	11.8549	0.12013	0.06582	0.06582	0.01034	0.0655275	92.44	9.75	0.11	-3.24	NaN	NaN	NaN	NaN	NaN	17.9707	17.1677	17.388	NaN	17.51	16.0202	NaN	NaN	15.9071	15.96	NaN	NaN	NaN	NaN	NaN			cell part;cytoplasmic part;endosomal part;endosome membrane;extracellular membrane-bounded organelle;extracellular organelle;extracellular region part;extracellular vesicular exosome;integral to membrane;intracellular organelle part;intracellular part;intrinsic to membrane;membrane;membrane part;membrane-bounded organelle;membrane-bounded vesicle;organelle;organelle membrane;organelle part;vesicle		E9PZ69;P58021	Transmembrane 9 superfamily member 2	Tm9sf2
19.262	9.1919	8.9831	9.9827	11.8549	0.12013	0.2744	0.06582	0.01034	0.117672	92.44	9.75	0.11	-3.24	14.7974	NaN	NaN	NaN	NaN	17.9135	NaN	NaN	16.8449	17.38	15.6831	15.7568	NaN	16.0394	15.83	NaN	13.6032	NaN	NaN	NaN	biological regulation;biosynthetic process;cellular biosynthetic process;cellular macromolecule biosynthetic process;cellular macromolecule metabolic process;cellular metabolic process;cellular nitrogen compound metabolic process;cellular process;cellular response to stimulus;cellular response to stress;circadian rhythm;DNA metabolic process;DNA recombination;DNA repair;macromolecule biosynthetic…	binding;core promoter binding;DNA binding;identical protein binding;nucleic acid binding;nucleotide binding;protein binding;regulatory region DNA binding;regulatory region nucleic acid binding;transcription regulatory region DNA binding	cell part;intracellular membrane-bounded organelle;intracellular non-membrane-bounded organelle;intracellular organelle;intracellular organelle part;intracellular part;membrane;membrane-bounded organelle;non-membrane-bounded organelle;nuclear body;nuclear matrix;nuclear part;nuclear speck;nucleolus;nucleoplasm;nucleoplasm part;nucleus;organelle;organelle part;paraspeckles		Q99K48	Non-POU domain-containing octamer-binding protein	Nono
19.262	9.1919	8.9831	9.9827	11.8549	0.12013	0.06582	0.06582	0.01034	0.0655275	92.44	9.75	0.11	-3.24	NaN	NaN	NaN	NaN	NaN	NaN	18.0096	16.5241	NaN	17.27	17.0316	NaN	16.4564	NaN	16.74	NaN	NaN	NaN	NaN	NaN	ADP biosynthetic process;ADP metabolic process;AMP metabolic process;anatomical structure development;ATP metabolic process;biosynthetic process;brain development;cellular biosynthetic process;cellular metabolic process;cellular nitrogen compound biosynthetic process;cellular nitrogen compound metabolic process;cellular process;developmental process;GTP metabolic process;heterocycle biosynthetic …	adenyl nucleotide binding;adenyl ribonucleotide binding;adenylate kinase activity;ATP binding;binding;catalytic activity;GTP binding;guanyl nucleotide binding;guanyl ribonucleotide binding;kinase activity;nucleobase-containing compound kinase activity;nucleoside diphosphate kinase activity;nucleoside triphosphate adenylate kinase activity;nucleotide binding;nucleotide kinase activity;phosphotrans…	cell part;cytoplasmic part;extracellular membrane-bounded organelle;extracellular organelle;extracellular region part;extracellular vesicular exosome;intracellular membrane-bounded organelle;intracellular organelle;intracellular organelle lumen;intracellular organelle part;intracellular part;membrane-bounded organelle;membrane-bounded vesicle;membrane-enclosed lumen;mitochondrial matrix;mitochond…	Purine metabolism	Q9WUR9	Adenylate kinase 4, mitochondrial	Ak4
19.262	9.1919	8.9831	9.9827	11.8549	0.12013	0.06582	0.06582	0.01034	0.0655275	92.44	9.75	0.11	-3.24	NaN	NaN	NaN	NaN	NaN	17.539	NaN	NaN	16.9208	17.23	15.0846	NaN	NaN	15.909	15.5	NaN	NaN	NaN	NaN	NaN	actin cytoskeleton organization;actin filament-based process;actomyosin structure organization;cell differentiation;cellular component organization;cellular component organization at cellular level;cellular component organization or biogenesis;cellular component organization or biogenesis at cellular level;cellular developmental process;cellular process;cytoskeleton organization;developmental pro…		actin cytoskeleton;adherens junction;anchoring junction;cell junction;cell part;cell-substrate adherens junction;cell-substrate junction;cytoplasm;cytoskeleton;focal adhesion;intracellular non-membrane-bounded organelle;intracellular organelle;intracellular part;non-membrane-bounded organelle;organelle		Q9DAW9;A0A0G2JFC8;A0A0G2JFG3;A0A0G2JDV8	Calponin-3	Cnn3
19.262	9.1919	8.9831	9.9827	11.8549	0.12013	0.06582	0.15797	0.01034	0.088565	92.44	9.75	0.11	-3.24	NaN	NaN	NaN	NaN	NaN	NaN	17.819	NaN	16.5305	17.17	NaN	20.408	20.3777	NaN	20.39	NaN	NaN	17.5326	NaN	NaN	alcohol metabolic process;amine metabolic process;anatomical structure morphogenesis;biological adhesion;biological regulation;biosynthetic process;catabolic process;cell adhesion;cell part morphogenesis;cell projection morphogenesis;cell projection organization;cell-cell adhesion;cellular amine metabolic process;cellular biogenic amine metabolic process;cellular catabolic process;cellular compon…	alcohol binding;amine binding;antioxidant activity;binding;cation binding;cholesterol binding;cholesterol transporter activity;copper ion binding;enzyme activator activity;enzyme regulator activity;identical protein binding;ion binding;lipid binding;lipid transporter activity;metal ion binding;phosphatidylcholine binding;phosphatidylcholine-sterol O-acyltransferase activator activity;phospholipid…	blood microparticle;cell part;cell surface;chylomicron;cytoplasmic part;cytosol;extracellular membrane-bounded organelle;extracellular organelle;extracellular region;extracellular region part;extracellular space;extracellular vesicular exosome;high-density lipoprotein particle;intracellular part;macromolecular complex;membrane-bounded organelle;membrane-bounded vesicle;organelle;plasma lipoprotei…	Fat digestion and absorption;Vitamin digestion and absorption	P06728	Apolipoprotein A-IV	Apoa4
19.262	9.1919	8.9831	9.9827	11.8549	0.12013	0.06582	0.06582	0.01034	0.0655275	92.44	9.75	0.11	-3.24	NaN	NaN	NaN	NaN	NaN	16.6337	17.5777	NaN	17.3079	17.17	NaN	NaN	16.1926	15.9036	16.05	NaN	NaN	NaN	NaN	NaN	cellular macromolecule metabolic process;cellular metabolic process;cellular nitrogen compound metabolic process;cellular process;macromolecule metabolic process;metabolic process;mRNA metabolic process;mRNA processing;nitrogen compound metabolic process;nuclear mRNA splicing, via spliceosome;nucleic acid metabolic process;nucleobase-containing compound metabolic process;primary metabolic process…	binding;cation binding;ion binding;metal ion binding;nucleic acid binding;RNA binding;transition metal ion binding;zinc ion binding	catalytic step 2 spliceosome;cell part;intracellular organelle part;intracellular part;macromolecular complex;nuclear part;nucleoplasm;organelle part;ribonucleoprotein complex;spliceosomal complex	Spliceosome	Q9D554	Splicing factor 3A subunit 3	Sf3a3
19.262	9.1919	8.9831	9.9827	11.8549	0.12013	0.06582	0.06582	0.01034	0.0655275	92.44	9.75	0.11	-3.24	NaN	NaN	NaN	NaN	NaN	16.8863	17.1238	NaN	NaN	17.01	NaN	15.2934	16.6774	NaN	15.99	NaN	NaN	NaN	NaN	NaN	activation of immune response;activation of innate immune response;amine metabolic process;aminoglycan catabolic process;aminoglycan metabolic process;biological regulation;carbohydrate catabolic process;carbohydrate metabolic process;catabolic process;cellular process;cellular response to stimulus;defense response;defense response to bacterium;defense response to Gram-positive bacterium;detectio…	binding;carbohydrate binding;catalytic activity;cation binding;glycosaminoglycan binding;hydrolase activity;hydrolase activity, acting on carbon-nitrogen (but not peptide) bonds;hydrolase activity, acting on carbon-nitrogen (but not peptide) bonds, in linear amides;ion binding;metal ion binding;molecular transducer activity;N-acetylmuramoyl-L-alanine amidase activity;pattern binding;pattern recog…	cell part;extracellular membrane-bounded organelle;extracellular organelle;extracellular region part;extracellular vesicular exosome;membrane;membrane-bounded organelle;membrane-bounded vesicle;organelle;vesicle		Q8VCS0	N-acetylmuramoyl-L-alanine amidase	Pglyrp2
19.262	9.1919	8.9831	9.9827	11.8549	0.12013	0.06582	0.06582	0.01034	0.0655275	92.44	9.75	0.11	-3.24	NaN	NaN	NaN	NaN	NaN	NaN	NaN	16.3084	17.1051	16.71	15.4137	NaN	NaN	15.8469	15.63	NaN	NaN	NaN	NaN	NaN	cellular component assembly;cellular component assembly at cellular level;cellular component organization;cellular component organization at cellular level;cellular component organization or biogenesis;cellular component organization or biogenesis at cellular level;cellular macromolecular complex assembly;cellular macromolecular complex subunit organization;cellular process;formation of translati…	binding;nucleic acid binding;RNA binding;translation factor activity, nucleic acid binding;translation initiation factor activity	cell part;cytoplasmic part;eukaryotic 43S preinitiation complex;eukaryotic 48S preinitiation complex;eukaryotic translation initiation factor 3 complex;eukaryotic translation initiation factor 3 complex, eIF3m;extracellular membrane-bounded organelle;extracellular organelle;extracellular region part;extracellular vesicular exosome;intracellular part;macromolecular complex;membrane;membrane-bounde…	Measles;RNA transport	Q91WK2	Eukaryotic translation initiation factor 3 subunit H	Eif3h
19.262	9.1919	8.9831	9.9827	11.8549	0.12013	0.06582	0.06582	0.01034	0.0655275	92.44	9.75	0.11	-3.24	NaN	NaN	NaN	NaN	NaN	NaN	16.8477	16.358	16.7204	16.64	NaN	15.3346	14.8869	NaN	15.11	NaN	NaN	NaN	NaN	NaN	biological regulation;cellular component assembly;cellular component assembly at cellular level;cellular component organization;cellular component organization at cellular level;cellular component organization or biogenesis;cellular component organization or biogenesis at cellular level;cellular macromolecular complex assembly;cellular macromolecular complex subunit organization;cellular process;…	binding;nucleic acid binding;ribonucleoprotein binding;ribosome binding;RNA binding;translation factor activity, nucleic acid binding;translation initiation factor activity	cell part;cytoplasmic part;eukaryotic 43S preinitiation complex;eukaryotic 48S preinitiation complex;eukaryotic translation initiation factor 3 complex;eukaryotic translation initiation factor 3 complex, eIF3m;intracellular part;macromolecular complex;protein complex;ribonucleoprotein complex;translation preinitiation complex	RNA transport	Q8R1B4	Eukaryotic translation initiation factor 3 subunit C	Eif3c
19.262	9.1919	8.9831	9.9827	11.8549	0.12013	0.06582	0.06582	0.24909	0.125215	92.44	9.75	0.11	-3.24	NaN	NaN	NaN	NaN	NaN	NaN	NaN	16.3555	16.7366	16.55	14.1881	14.9032	NaN	15.0769	14.72	NaN	NaN	NaN	13.3676	NaN	binding of sperm to zona pellucida;cell recognition;cell-cell recognition;cellular macromolecule metabolic process;cellular metabolic process;cellular process;cellular process involved in reproduction;cellular protein metabolic process;macromolecule metabolic process;metabolic process;primary metabolic process;protein folding;protein metabolic process;reproductive process;sperm-egg recognition	adenyl nucleotide binding;adenyl ribonucleotide binding;ATP binding;binding;identical protein binding;nucleotide binding;protein binding;purine nucleotide binding;purine ribonucleoside triphosphate binding;purine ribonucleotide binding;ribonucleotide binding	cell body;cell part;chaperonin-containing T-complex;cytoplasmic part;cytoskeletal part;cytosolic part;extracellular membrane-bounded organelle;extracellular organelle;extracellular region part;extracellular vesicular exosome;intracellular membrane-bounded organelle;intracellular organelle;intracellular organelle part;intracellular part;macromolecular complex;membrane-bounded organelle;membrane-bo…		P80313	T-complex protein 1 subunit eta	Cct7
19.262	6.2928	8.9831	9.9827	11.1302	0.12013	0.06582	0.06582	0.01034	0.0655275	92.44	9.75	0.11	-3.24	NaN	13.9592	NaN	NaN	NaN	NaN	16.7385	16.0965	16.5614	16.47	NaN	NaN	13.4041	14.1355	13.77	NaN	NaN	NaN	NaN	NaN	anatomical structure formation involved in morphogenesis;anterior/posterior pattern specification;blastocyst formation;cellular macromolecule metabolic process;cellular metabolic process;cellular nitrogen compound metabolic process;cellular process;developmental process;macromolecule metabolic process;metabolic process;mRNA metabolic process;mRNA processing;nitrogen compound metabolic process;nuc…	binding;chromatin binding	catalytic step 2 spliceosome;cell part;chromatin;chromosomal part;intracellular membrane-bounded organelle;intracellular organelle;intracellular organelle part;intracellular part;macromolecular complex;membrane-bounded organelle;nuclear matrix;nuclear part;nucleoplasm;nucleus;organelle;organelle part;ribonucleoprotein complex;small nuclear ribonucleoprotein complex;spliceosomal complex;U12-type s…	Spliceosome	G5E866;Q99NB9	Splicing factor 3B subunit 1	Sf3b1
19.262	4.3697	8.9831	9.9827	10.6494	0.18616	0.06582	0.06582	0.01034	0.082035	92.44	9.75	0.11	-3.24	NaN	13.0979	NaN	NaN	NaN	15.1474	16.3166	NaN	17.501	16.32	15.891	14.2894	14.4109	14.9284	14.88	12.2467	NaN	NaN	NaN	NaN	biological regulation;cellular process;cellular response to chemical stimulus;cellular response to hypoxia;cellular response to oxygen levels;cellular response to stimulus;cellular response to stress;negative regulation of apoptosis;negative regulation of biological process;negative regulation of cell death;negative regulation of cellular process;negative regulation of programmed cell death;regul…	adenyl nucleotide binding;adenyl ribonucleotide binding;ATP binding;binding;nucleotide binding;purine nucleotide binding;purine ribonucleoside triphosphate binding;purine ribonucleotide binding;ribonucleotide binding	adherens junction;anchoring junction;cell junction;cell part;cell-substrate adherens junction;cell-substrate junction;cytoplasmic part;endoplasmic reticulum chaperone complex;endoplasmic reticulum lumen;endoplasmic reticulum part;extracellular membrane-bounded organelle;extracellular organelle;extracellular region;extracellular region part;extracellular vesicular exosome;focal adhesion;intracellu…	Protein processing in endoplasmic reticulum	Q9JKR6	Hypoxia up-regulated protein 1	Hyou1
19.262	9.1919	8.9831	9.9827	11.8549	0.12013	0.06582	0.06582	0.01034	0.0655275	92.44	9.75	0.11	-3.24	NaN	NaN	NaN	NaN	NaN	NaN	17.1566	17.1743	14.305	16.21	16.5324	15.0846	NaN	NaN	15.81	NaN	NaN	NaN	NaN	NaN			cell part;contractile fiber part;costamere;cytoplasm;cytoplasmic part;cytoplasmic vesicle membrane;cytoplasmic vesicle part;intracellular organelle part;intracellular part;membrane;organelle membrane;organelle part;plasma membrane;vesicle membrane;Z disc		F7CVJ5;F7DBB3;E9PYB0	AHNAK nucleoprotein 2	Ahnak2
19.262	9.1919	8.9831	3.309	10.1865	0.12013	0.06582	0.06582	0.01034	0.0655275	92.44	9.75	0.11	-3.24	NaN	NaN	NaN	13.5597	NaN	NaN	16.323	NaN	15.4176	15.87	13.7754	15.4926	NaN	14.7972	14.69	NaN	NaN	NaN	NaN	NaN	biosynthetic process;carbohydrate biosynthetic process;carbohydrate metabolic process;cellular carbohydrate metabolic process;cellular macromolecule metabolic process;cellular metabolic process;cellular process;cellular protein metabolic process;dolichol-linked oligosaccharide biosynthetic process;glycosylation;macromolecule glycosylation;macromolecule metabolic process;macromolecule modification…	alpha-1,3-mannosyltransferase activity;alpha-1,6-mannosyltransferase activity;binding;calcium-dependent protein binding;catalytic activity;glycolipid 3-alpha-mannosyltransferase activity;glycolipid 6-alpha-mannosyltransferase activity;glycolipid mannosyltransferase activity;mannosyltransferase activity;protein binding;protein dimerization activity;protein heterodimerization activity;protein N-ter…	cell part;cytoplasm;cytoplasmic part;integral to membrane;intracellular membrane-bounded organelle;intracellular organelle;intracellular part;intrinsic to membrane;membrane;membrane part;membrane-bounded organelle;nucleus;organelle;perinuclear region of cytoplasm	N-Glycan biosynthesis;Various types of N-glycan biosynthesis	Q9DBE8	Alpha-1,3/1,6-mannosyltransferase ALG2	Alg2
19.262	9.1919	8.9831	9.9827	11.8549	0.37285	0.06582	0.06582	0.01034	0.128708	92.44	9.75	0.11	-3.24	NaN	NaN	NaN	NaN	NaN	NaN	16.6528	16.2083	14.2712	15.71	14.6858	NaN	NaN	15.0076	14.85	13.3333	NaN	NaN	NaN	NaN	biosynthetic process;carbohydrate biosynthetic process;carbohydrate catabolic process;carbohydrate metabolic process;catabolic process;cellular biosynthetic process;cellular carbohydrate biosynthetic process;cellular carbohydrate catabolic process;cellular carbohydrate metabolic process;cellular glucan metabolic process;cellular macromolecule biosynthetic process;cellular macromolecule metabolic …	4-alpha-glucanotransferase activity;alpha-glucosidase activity;amylo-alpha-1,6-glucosidase activity;binding;carbohydrate binding;catalytic activity;glucosidase activity;glycogen debranching enzyme activity;hydrolase activity;hydrolase activity, acting on glycosyl bonds;hydrolase activity, hydrolyzing O-glycosyl compounds;pattern binding;polysaccharide binding;polyubiquitin binding;protein binding…	cell part;cytoplasm;cytoplasmic part;endoplasmic reticulum;inclusion body;intracellular membrane-bounded organelle;intracellular organelle;intracellular organelle part;intracellular part;membrane-bounded organelle;nuclear part;nucleoplasm;nucleus;organelle;organelle part;sarcoplasmic reticulum	Starch and sucrose metabolism	A0A0G2JGI9;F8VPN4;E0CYU6	4-alpha-glucanotransferase	Agl
19.262	9.1919	3.6351	9.9827	10.5179	0.17228	0.06582	0.06582	0.01034	0.078565	92.44	9.75	0.11	-3.24	NaN	NaN	11.436	NaN	NaN	15.5102	15.643	15.0374	16.4681	15.66	15.8388	14.0982	14.1226	15.2938	14.84	11.9072	NaN	NaN	NaN	NaN	cell junction assembly;cell junction organization;cell-substrate junction assembly;cellular component assembly;cellular component assembly at cellular level;cellular component organization;cellular component organization at cellular level;cellular component organization or biogenesis;cellular component organization or biogenesis at cellular level;cellular process;hemidesmosome assembly	ankyrin binding;binding;cytoskeletal protein binding;protein binding;structural constituent of muscle;structural molecule activity	adherens junction;anchoring junction;brush border;cell junction;cell part;cell projection;cell-substrate adherens junction;cell-substrate junction;contractile fiber;cytoplasm;cytoplasmic part;cytoskeleton;extracellular membrane-bounded organelle;extracellular organelle;extracellular region part;extracellular vesicular exosome;focal adhesion;hemidesmosome;intermediate filament cytoskeleton;intrace…		E9Q3W4;Q9QXS1	Plectin	Plec
19.262	9.1919	8.9831	9.9827	11.8549	0.12013	0.06582	0.06582	0.26505	0.129205	92.44	9.75	0.11	-3.24	NaN	NaN	NaN	NaN	NaN	16.5851	NaN	14.5057	NaN	15.55	NaN	NaN	14.4486	15.7919	15.12	NaN	NaN	NaN	11.6678	NaN	5-phosphoribose 1-diphosphate biosynthetic process;5-phosphoribose 1-diphosphate metabolic process;alcohol biosynthetic process;alcohol metabolic process;biological regulation;biosynthetic process;carbohydrate biosynthetic process;carbohydrate catabolic process;carbohydrate homeostasis;carbohydrate metabolic process;catabolic process;cell death;cellular biosynthetic process;cellular carbohydrate …	adenyl nucleotide binding;adenyl ribonucleotide binding;AMP binding;ATP binding;bile acid binding;binding;carbohydrate binding;carboxylic acid binding;catalytic activity;cofactor binding;drug binding;glycogen phosphorylase activity;lipid binding;monocarboxylic acid binding;nucleobase binding;nucleotide binding;phosphorylase activity;purine base binding;purine nucleotide binding;purine ribonucleos…	cell part;cytoplasm;extracellular membrane-bounded organelle;extracellular organelle;extracellular region part;extracellular vesicular exosome;intracellular part;membrane;membrane-bounded organelle;membrane-bounded vesicle;organelle;plasma membrane;vesicle	Insulin signaling pathway;Starch and sucrose metabolism	Q9ET01;Q3UEJ6	Glycogen phosphorylase, liver form;Alpha-1,4 glucan phosphorylase	Pygl
19.262	9.1919	8.9831	9.9827	11.8549	0.12013	0.06582	0.06582	0.01034	0.0655275	92.44	9.75	0.11	-3.24	NaN	NaN	NaN	NaN	NaN	NaN	15.508	NaN	15.5088	15.51	NaN	NaN	NaN	15.1263	NaN	NaN	NaN	NaN	NaN	NaN	biological regulation;cellular macromolecule metabolic process;cellular metabolic process;cellular nitrogen compound metabolic process;cellular process;cellular protein metabolic process;cellular response to stimulus;cellular response to stress;DNA metabolic process;DNA recombination;DNA repair;double-strand break repair;double-strand break repair via homologous recombination;double-strand break …	binding;catalytic activity;cation binding;endopeptidase activator activity;endopeptidase activity;endopeptidase regulator activity;enzyme activator activity;enzyme regulator activity;hydrolase activity;ion binding;metal ion binding;metallopeptidase activity;peptidase activator activity;peptidase activity;peptidase activity, acting on L-amino acid peptides;peptidase regulator activity;proteasome b…	cell part;extracellular membrane-bounded organelle;extracellular organelle;extracellular region part;extracellular vesicular exosome;intracellular membrane-bounded organelle;intracellular organelle;intracellular part;macromolecular complex;membrane-bounded organelle;membrane-bounded vesicle;nucleus;organelle;proteasome accessory complex;proteasome complex;proteasome regulatory particle, lid subco…	Proteasome	O35593	26S proteasome non-ATPase regulatory subunit 14	Psmd14
19.262	9.1919	3.6124	9.9827	10.5122	0.12013	0.06582	0.06582	0.52796	0.194933	92.44	9.75	0.11	-3.24	NaN	NaN	13.1283	NaN	NaN	16.1453	14.2429	15.2762	16.0507	15.43	14.8592	NaN	NaN	15.6523	15.26	NaN	NaN	NaN	13.1173	NaN	carbohydrate metabolic process;cellular carbohydrate metabolic process;cellular macromolecule metabolic process;cellular metabolic process;cellular process;cellular protein metabolic process;glycosylation;macromolecule glycosylation;macromolecule metabolic process;macromolecule modification;metabolic process;primary metabolic process;protein glycosylation;protein metabolic process;protein modific…	binding;catalytic activity;glucosyltransferase activity;protein binding;transferase activity;transferase activity, transferring glycosyl groups;transferase activity, transferring hexosyl groups;UDP-glucose:glycoprotein glucosyltransferase activity;UDP-glucosyltransferase activity;UDP-glycosyltransferase activity;unfolded protein binding	cell part;cytoplasmic part;endoplasmic reticulum;endoplasmic reticulum lumen;endoplasmic reticulum part;endoplasmic reticulum-Golgi intermediate compartment;extracellular membrane-bounded organelle;extracellular organelle;extracellular region part;extracellular vesicular exosome;intracellular membrane-bounded organelle;intracellular organelle;intracellular organelle lumen;intracellular organelle …	Protein processing in endoplasmic reticulum	Q6P5E4	UDP-glucose:glycoprotein glucosyltransferase 1	Uggt1
19.262	9.1919	2.9508	9.9827	10.3468	0.33083	0.06582	0.06582	0.01034	0.118203	92.44	9.75	0.11	-3.24	NaN	NaN	12.1722	NaN	NaN	NaN	NaN	14.7261	15.1324	14.93	13.1722	13.9496	NaN	NaN	13.56	11.3976	NaN	NaN	NaN	NaN	biological regulation;cellular localization;cellular macromolecule localization;cellular process;cellular protein localization;establishment of localization;establishment of localization in cell;establishment of organelle localization;establishment of protein localization;establishment of ribosome localization;establishment of RNA localization;intracellular protein transport;intracellular transpo…	binding;nucleic acid binding;nucleocytoplasmic transporter activity;protein transporter activity;RNA binding;substrate-specific transporter activity;transporter activity	annulate lamellae;Cajal body;cell part;chromosomal part;cytoplasm;intracellular membrane-bounded organelle;intracellular non-membrane-bounded organelle;intracellular organelle;intracellular organelle part;intracellular part;kinetochore;macromolecular complex;membrane;membrane part;membrane-bounded organelle;non-membrane-bounded organelle;nuclear body;nuclear membrane;nuclear part;nucleolus;nucleo…	Ribosome biogenesis in eukaryotes;RNA transport	Q6P5F9	Exportin-1	Xpo1
19.262	9.1919	8.9831	9.9827	11.8549	0.12013	0.06582	0.06582	0.01034	0.0655275	92.44	9.75	0.11	-3.24	NaN	NaN	NaN	NaN	NaN	NaN	14.6598	NaN	14.7111	14.69	15.2727	NaN	NaN	15.0314	15.15	NaN	NaN	NaN	NaN	NaN	establishment of localization;establishment of localization in cell;establishment of protein localization;intracellular protein transport;intracellular transport;protein transport;transport		cell part;cytoplasm;extracellular membrane-bounded organelle;extracellular organelle;extracellular region part;extracellular vesicular exosome;intracellular membrane-bounded organelle;intracellular organelle;intracellular part;membrane-bounded organelle;membrane-bounded vesicle;nucleus;organelle;vesicle		Q3TKD0;Q8BFY9;J3QMX2;Q99LG2	Transportin-1;Transportin-2	Tnpo1;Tnpo2
19.262	9.1919	8.9831	4.0024	10.3598	0.23071	0.06582	0.06582	0.01034	0.0931725	92.44	9.75	0.11	-3.24	NaN	NaN	NaN	11.0057	NaN	15.5695	NaN	14.3121	14.1116	14.66	13.6652	NaN	12.4488	14.7352	13.62	11.8283	NaN	NaN	NaN	NaN	actin filament capping;biological regulation;cell cycle cytokinesis;cell cycle process;cellular component assembly;cellular component assembly at cellular level;cellular component organization;cellular component organization at cellular level;cellular component organization or biogenesis;cellular component organization or biogenesis at cellular level;cellular macromolecule metabolic process;cellu…	ankyrin binding;binding;cytoskeletal protein binding;lipid binding;phospholipid binding;protein binding;structural constituent of cytoskeleton;structural molecule activity	axolemma;axon part;cell cortex part;cell part;cell projection membrane;cell projection part;contractile fiber part;cortical cytoskeleton;cuticular plate;cytoplasm;cytoplasmic part;cytoskeletal part;cytoskeleton;extracellular membrane-bounded organelle;extracellular organelle;extracellular region part;extracellular vesicular exosome;intracellular membrane-bounded organelle;intracellular non-membra…		A0A0A0MQG2;Q62261	Spectrin beta chain, non-erythrocytic 1	Sptbn1
19.262	9.1919	8.9831	9.9827	11.8549	0.12013	0.06582	0.06582	0.01034	0.0655275	92.44	9.75	0.11	-3.24	NaN	NaN	NaN	NaN	NaN	14.4541	14.2568	NaN	13.3926	14.03	12.9849	NaN	12.9603	13.4722	13.14	NaN	NaN	NaN	NaN	NaN	adult behavior;adult locomotory behavior;behavior;cell communication;cell-cell signaling;cellular component assembly;cellular component organization;cellular component organization at cellular level;cellular component organization or biogenesis;cellular component organization or biogenesis at cellular level;cellular macromolecule metabolic process;cellular membrane organization;cellular metabolic…	binding;catalytic activity;enzyme binding;GTP binding;GTPase activity;guanyl nucleotide binding;guanyl ribonucleotide binding;hydrolase activity;hydrolase activity, acting on acid anhydrides;hydrolase activity, acting on acid anhydrides, in phosphorus-containing anhydrides;identical protein binding;kinase binding;nucleoside-triphosphatase activity;nucleotide binding;protein binding;protein dimeri…	cell part;cytoplasmic part;cytoskeletal part;extracellular membrane-bounded organelle;extracellular organelle;extracellular region part;extracellular vesicular exosome;intracellular organelle part;intracellular part;macromolecular complex;membrane coat;membrane part;membrane-bounded organelle;membrane-bounded vesicle;microtubule;myelin sheath;organelle;organelle part;photoreceptor inner segment;p…	Bacterial invasion of epithelial cells;Endocrine and other factor-regulated calcium reabsorption;Endocytosis;Fc gamma R-mediated phagocytosis	P39053;D6RH60	Dynamin-1	Dnm1
6.2146	NaN	NaN	9.8827	8.04865	0.12013	0.06582	0.06582	0.18387	0.10891	88.95	9.75	0.11	-3.19	18.4633	NaN	NaN	16.8606	17.66	20.9399	NaN	NaN	20.2404	20.59	18.9351	NaN	NaN	21.2401	20.09	NaN	NaN	NaN	17.7132	NaN	actin cytoskeleton organization;actin cytoskeleton reorganization;actin filament-based process;activation of caspase activity;autophagy;biological adhesion;biological regulation;catabolic process;cell adhesion;cell chemotaxis;cell migration;cell motility;cell-cell adhesion;cellular catabolic process;cellular component movement;cellular component organization;cellular component organization at cel…	antioxidant activity;arachidonic acid binding;binding;calcium ion binding;carboxylic acid binding;cation binding;fatty acid binding;icosanoid binding;icosatetraenoic acid binding;ion binding;lipid binding;metal ion binding;monocarboxylic acid binding;transition metal ion binding;zinc ion binding	cell part;cytoplasm;cytoskeleton;extracellular membrane-bounded organelle;extracellular organelle;extracellular region part;extracellular space;extracellular vesicular exosome;intracellular membrane-bounded organelle;intracellular non-membrane-bounded organelle;intracellular organelle;intracellular part;membrane;membrane-bounded organelle;membrane-bounded vesicle;non-membrane-bounded organelle;nu…		P31725	Protein S100-A9	S100a9
NaN	7.8145	5.8439	NaN	6.8292	0.12013	0.23134	0.06582	0.01034	0.106908	87.23	9.75	0.11	-3.16	NaN	16.1659	19.6004	NaN	17.88	18.2137	21.9853	22.5326	NaN	20.91	NaN	20.4985	22.0835	15.0292	19.2	NaN	16.1316	NaN	NaN	NaN	metabolic process	carboxylic ester hydrolase activity;catalytic activity;hydrolase activity;hydrolase activity, acting on ester bonds	cell part;cytoplasmic part;endoplasmic reticulum lumen;endoplasmic reticulum part;extracellular region part;extracellular space;intracellular organelle lumen;intracellular organelle part;intracellular part;membrane-enclosed lumen;organelle lumen;organelle part	Drug metabolism - other enzymes	P23953	Carboxylesterase 1C	Ces1c
6.2142	NaN	NaN	7.3824	6.7983	0.57044	0.06582	0.06582	0.01034	0.178105	87.18	9.75	0.11	-3.16	14.3942	NaN	NaN	14.0955	14.24	17.978	14.1849	16.5369	19.0956	16.95	14.1738	NaN	NaN	17.3724	15.77	14.3542	NaN	NaN	NaN	NaN	aging;biological regulation;biosynthetic process;catabolic process;cellular catabolic process;cellular component organization;cellular component organization or biogenesis;cellular metabolic process;cellular process;cellular response to chemical stimulus;cellular response to hydrogen peroxide;cellular response to oxidative stress;cellular response to oxygen radical;cellular response to reactive o…	antioxidant activity;binding;carbohydrate binding;catalytic activity;cation binding;glycosaminoglycan binding;heme binding;heparin binding;ion binding;iron ion binding;metal ion binding;oxidoreductase activity;oxidoreductase activity, acting on peroxide as acceptor;pattern binding;peroxidase activity;polysaccharide binding;tetrapyrrole binding;transition metal ion binding	azurophil granule;cell part;cytoplasmic membrane-bounded vesicle;cytoplasmic part;cytoplasmic vesicle;extracellular membrane-bounded organelle;extracellular organelle;extracellular region part;extracellular space;extracellular vesicular exosome;intracellular membrane-bounded organelle;intracellular organelle;intracellular part;lysosome;lytic vacuole;membrane-bounded organelle;membrane-bounded ves…	Phagosome	P11247;F7DC05	Myeloperoxidase;Myeloperoxidase light chain;Myeloperoxidase heavy chain	Mpo
NaN	5.6801	7.1658	NaN	6.42295	0.12013	0.06582	0.06582	0.01034	0.0655275	86.53	9.75	0.11	-3.15	NaN	16.8927	15.9502	NaN	16.42	NaN	19.3242	18.8	NaN	19.06	NaN	18.1968	18.1969	NaN	18.2	NaN	NaN	NaN	NaN	NaN	amine metabolic process;aminoglycan metabolic process;carbohydrate metabolic process;glycosaminoglycan metabolic process;hyaluronan metabolic process;macromolecule metabolic process;metabolic process;nitrogen compound metabolic process;polysaccharide metabolic process;primary metabolic process	endopeptidase inhibitor activity;endopeptidase regulator activity;enzyme inhibitor activity;enzyme regulator activity;peptidase inhibitor activity;peptidase regulator activity;serine-type endopeptidase inhibitor activity	extracellular membrane-bounded organelle;extracellular organelle;extracellular region part;extracellular vesicular exosome;membrane-bounded organelle;membrane-bounded vesicle;organelle;vesicle		Q61704;E9PVS1	Inter-alpha-trypsin inhibitor heavy chain H3	Itih3
8.9521	NaN	NaN	3.7084	6.33025	0.12013	0.06582	0.06582	0.01034	0.0655275	86.36	9.75	0.11	-3.15	13.0722	NaN	NaN	12.7316	12.9	16.8148	NaN	16.8862	14.7487	16.15	15.9858	14.7394	14.5424	16.882	15.54	NaN	NaN	NaN	NaN	NaN	biological regulation;cellular component assembly;cellular component assembly at cellular level;cellular component organization;cellular component organization at cellular level;cellular component organization or biogenesis;cellular component organization or biogenesis at cellular level;cellular macromolecular complex assembly;cellular macromolecular complex subunit organization;cellular macromol…	adenyl nucleotide binding;adenyl ribonucleotide binding;alpha-tubulin binding;ATP binding;binding;cytoskeletal protein binding;nucleotide binding;protein binding;purine nucleotide binding;purine ribonucleoside triphosphate binding;purine ribonucleotide binding;ribonucleotide binding;tubulin binding	cell part;cytoplasm;cytoplasmic part;cytosol;extracellular membrane-bounded organelle;extracellular organelle;extracellular region;extracellular region part;extracellular vesicular exosome;intracellular membrane-bounded organelle;intracellular organelle;intracellular organelle part;intracellular part;membrane-bounded organelle;membrane-bounded vesicle;mitochondrion;nuclear part;nucleoplasm;nucleu…	Antigen processing and presentation;Protein processing in endoplasmic reticulum	Q3U2G2;Q61316	Heat shock 70 kDa protein 4	Hspa4
3.0432	NaN	NaN	7.7214	5.3823	0.12013	0.06582	0.06582	0.13586	0.0969075	84.33	9.75	0.12	-3.11	14.4538	NaN	NaN	10.6744	12.56	15.7838	NaN	16.8511	13.5275	15.39	12.8959	NaN	NaN	15.3797	14.14	NaN	NaN	NaN	11.5443	NaN	adaptive immune response;anatomical structure development;anatomical structure morphogenesis;biological regulation;blood vessel morphogenesis;catabolic process;cell activation;cell projection organization;cellular catabolic process;cellular chemical homeostasis;cellular component organization;cellular component organization at cellular level;cellular component organization or biogenesis;cellular …	amine binding;amino acid binding;binding;carboxylic acid binding;catalytic activity;channel inhibitor activity;channel regulator activity;ion channel inhibitor activity;ligase activity;phosphoprotein binding;phosphoserine binding;phosphothreonine binding;proline-rich region binding;protein binding;protein phosphorylated amino acid binding;sodium channel inhibitor activity;sodium channel regulator…	cell cortex;cell part;chromatin;chromosomal part;cytoplasm;cytoplasmic part;cytosol;extracellular membrane-bounded organelle;extracellular organelle;extracellular region part;extracellular vesicular exosome;Golgi apparatus;intracellular membrane-bounded organelle;intracellular organelle;intracellular organelle part;intracellular part;macromolecular complex;membrane;membrane-bounded organelle;memb…	Endocytosis;Ubiquitin mediated proteolysis	P46935;V9GWV8;Q3V335	E3 ubiquitin-protein ligase NEDD4	Nedd4
NaN	5.3594	NaN	5.3841	5.37175	0.12013	0.06582	0.34453	0.01034	0.135205	84.31	9.75	0.12	-3.11	NaN	15.6174	NaN	15.2585	15.44	NaN	19.3805	16.9523	17.664	18	NaN	NaN	17.2278	16.7059	16.97	NaN	NaN	15.571	NaN	NaN	antigen processing and presentation;biological regulation;cellular component organization;cellular component organization at cellular level;cellular component organization or biogenesis;cellular component organization or biogenesis at cellular level;cellular process;cellular response to stimulus;endosome organization;establishment of localization;establishment of localization in cell;establishmen…	binding;catalytic activity;GDP binding;GTP binding;GTPase activity;GTP-dependent protein binding;guanyl nucleotide binding;guanyl ribonucleotide binding;hydrolase activity;hydrolase activity, acting on acid anhydrides;hydrolase activity, acting on acid anhydrides, in phosphorus-containing anhydrides;nucleoside-triphosphatase activity;nucleotide binding;protein binding;purine nucleotide binding;pu…	cell part;cytoplasmic membrane-bounded vesicle;cytoplasmic part;cytoplasmic vesicle;early endosome;early endosome membrane;endocytic vesicle;endosomal part;endosome;endosome membrane;extracellular membrane-bounded organelle;extracellular organelle;extracellular region part;extracellular vesicular exosome;intracellular;intracellular membrane-bounded organelle;intracellular organelle;intracellular …	Amoebiasis;Endocytosis;ko05152;Phagosome;Vasopressin-regulated water reabsorption	P61021	Ras-related protein Rab-5B	Rab5b
NaN	NaN	2.2497	NaN	2.2497	0.36418	0.06582	0.06582	0.01034	0.12654	84.31	9.75	0.12	-3.11	NaN	NaN	15.303	15.6245	15.46	18.9327	17.8483	16.01	18.8395	17.91	17.5094	15.4244	17.002	16.1058	16.51	15.1965	NaN	NaN	NaN	NaN	3'-phosphoadenosine 5'-phosphosulfate biosynthetic process;3'-phosphoadenosine 5'-phosphosulfate metabolic process;anatomical structure development;biological regulation;biosynthetic process;blood coagulation;bone development;cellular biosynthetic process;cellular metabolic process;cellular nitrogen compound biosynthetic process;cellular nitrogen compound metabolic process;cellular process;coagul…	adenyl nucleotide binding;adenyl ribonucleotide binding;adenylylsulfate kinase activity;adenylyltransferase activity;ATP binding;binding;catalytic activity;kinase activity;nucleotide binding;nucleotidyltransferase activity;phosphotransferase activity, alcohol group as acceptor;purine nucleotide binding;purine ribonucleoside triphosphate binding;purine ribonucleotide binding;ribonucleotide binding…		Purine metabolism;Selenocompound metabolism;Sulfur metabolism	O88428	Bifunctional 3-phosphoadenosine 5-phosphosulfate synthase 2;Sulfate adenylyltransferase;Adenylyl-sulfate kinase	Papss2
NaN	4.7389	4.7917	5.9746	5.1684	0.12013	0.06582	0.06582	0.01034	0.0655275	83.79	9.75	0.12	-3.1	NaN	15.2573	14.8876	14.6985	14.95	19.3914	17.5129	16.9051	17.3125	17.78	NaN	16.5602	15.6572	16.9201	16.38	NaN	NaN	NaN	NaN	NaN	biological regulation;biosynthetic process;cellular biosynthetic process;cellular macromolecule biosynthetic process;cellular macromolecule metabolic process;cellular metabolic process;cellular nitrogen compound metabolic process;cellular process;macromolecule biosynthetic process;macromolecule metabolic process;metabolic process;mRNA metabolic process;mRNA processing;nitrogen compound metabolic …	binding;nucleotide binding;protein binding transcription factor activity;transcription coactivator activity;transcription cofactor activity;transcription factor binding transcription factor activity	cell part;cytoplasmic part;cytoskeletal part;cytoskeleton;intracellular membrane-bounded organelle;intracellular non-membrane-bounded organelle;intracellular organelle;intracellular organelle part;intracellular part;membrane-bounded organelle;microtubule cytoskeleton;microtubule organizing center;non-membrane-bounded organelle;nuclear part;nucleoplasm;nucleus;organelle;organelle part		F7AA45;E9Q8F0;Q8VH51;B7ZD61	RNA-binding protein 39	Rbm39
NaN	NaN	4.9194	5.223	5.0712	0.12013	0.06582	0.06582	0.01034	0.0655275	83.53	9.75	0.12	-3.1	NaN	NaN	14.2555	14.1041	14.18	NaN	NaN	16.8374	16.7742	16.81	15.8735	15.8319	NaN	16.1484	15.95	NaN	NaN	NaN	NaN	NaN	biological regulation;cellular macromolecule metabolic process;cellular metabolic process;cellular process;cellular protein metabolic process;macromolecule metabolic process;metabolic process;posttranscriptional regulation of gene expression;primary metabolic process;protein folding;protein metabolic process;protein stabilization;regulation of biological process;regulation of biological quality;r…	binding;chaperone binding;enzyme binding;heat shock protein binding;Hsp90 protein binding;kinase binding;protein binding;unfolded protein binding	cell part;cell projection membrane;cell projection part;cytoplasm;cytoplasmic part;cytosol;extracellular membrane-bounded organelle;extracellular organelle;extracellular region part;extracellular vesicular exosome;intracellular part;leading edge membrane;membrane part;membrane-bounded organelle;membrane-bounded vesicle;organelle;plasma membrane part;ruffle membrane;vesicle		Q61081	Hsp90 co-chaperone Cdc37;Hsp90 co-chaperone Cdc37, N-terminally processed	Cdc37
4.2729	NaN	NaN	5.7573	5.0151	0.16784	0.06582	0.06582	0.01034	0.077455	83.38	9.75	0.12	-3.1	14.5826	NaN	NaN	13.3309	13.96	16.631	NaN	NaN	15.5898	16.11	15.1078	15.8597	14.36	15.6599	15.25	12.3164	NaN	NaN	NaN	NaN	biological regulation;biosynthetic process;cell differentiation;cellular biosynthetic process;cellular component assembly;cellular component assembly at cellular level;cellular component organization;cellular component organization at cellular level;cellular component organization or biogenesis;cellular component organization or biogenesis at cellular level;cellular developmental process;cellular…	adenyl nucleotide binding;adenyl ribonucleotide binding;ATP binding;ATPase activity;ATPase activity, coupled;ATP-dependent DNA helicase activity;ATP-dependent helicase activity;ATP-dependent RNA helicase activity;binding;catalytic activity;CTPase activity;DNA binding;DNA helicase activity;DNA-dependent ATPase activity;eukaryotic initiation factor 4E binding;GTPase activity;helicase activity;hydro…	cell part;cytoplasm;cytoplasmic part;extracellular membrane-bounded organelle;extracellular organelle;extracellular region part;extracellular vesicular exosome;intracellular membrane-bounded organelle;intracellular non-membrane-bounded organelle;intracellular organelle;intracellular organelle part;intracellular part;macromolecular complex;membrane;membrane-bounded organelle;membrane-bounded vesic…	RIG-I-like receptor signaling pathway	P16381;Q62167;Q62095	Putative ATP-dependent RNA helicase Pl10;ATP-dependent RNA helicase DDX3X;ATP-dependent RNA helicase DDX3Y	D1Pas1;Ddx3x;Ddx3y
4.3644	NaN	NaN	5.5688	4.9666	0.12013	0.06582	0.21678	0.01034	0.103268	83.24	9.75	0.12	-3.09	16.0357	NaN	NaN	15.0172	15.53	18.0424	17.8225	19.2788	17.1915	18.08	16.1777	16.2514	16.4331	NaN	16.29	NaN	NaN	14.5524	NaN	NaN	actin cytoskeleton organization;actin filament-based process;adherens junction organization;antigen processing and presentation;autophagy;biological regulation;catabolic process;cell chemotaxis;cell junction assembly;cell junction organization;cell migration;cell motility;cell projection organization;cell-cell junction assembly;cell-cell junction organization;cellular catabolic process;cellular c…	binding;catalytic activity;GDP binding;GTP binding;GTPase activity;guanyl nucleotide binding;guanyl ribonucleotide binding;hydrolase activity;hydrolase activity, acting on acid anhydrides;hydrolase activity, acting on acid anhydrides, in phosphorus-containing anhydrides;nucleoside-triphosphatase activity;nucleotide binding;protein binding;purine nucleotide binding;purine ribonucleoside triphospha…	cell junction;cell part;cell pole;cell projection;cell tip;cell-cell junction;clathrin-coated vesicle;coated vesicle;cytoplasm;cytoplasmic membrane-bounded vesicle;cytoplasmic part;cytoplasmic vesicle;cytoplasmic vesicle membrane;cytoplasmic vesicle part;endocytic vesicle;endocytic vesicle membrane;endoplasmic reticulum membrane;endoplasmic reticulum part;endoplasmic reticulum-Golgi intermediate …	Tight junction	Q9D1G1	Ras-related protein Rab-1B	Rab1b
3.8634	5.1712	4.4958	6.0447	4.89377	0.28284	0.06582	0.06582	0.01034	0.106205	83.03	9.75	0.12	-3.09	18.0653	17.0455	17.1807	16.9947	17.32	22.0959	19.3111	20.2674	20.4354	20.53	19.3301	18.5558	18.543	NaN	18.81	17.0652	NaN	NaN	NaN	NaN	biological regulation;biosynthetic process;cellular biosynthetic process;cellular component organization;cellular component organization at cellular level;cellular component organization or biogenesis;cellular component organization or biogenesis at cellular level;cellular macromolecule biosynthetic process;cellular macromolecule metabolic process;cellular metabolic process;cellular nitrogen comp…	binding;DNA binding;enzyme binding;identical protein binding;nucleic acid binding;protein binding;protein dimerization activity;protein domain specific binding;protein homodimerization activity;regulatory region DNA binding;regulatory region nucleic acid binding;sequence-specific DNA binding;transcription regulatory region DNA binding;transcription regulatory region sequence-specific DNA binding	cell part;centromeric heterochromatin;chromatin;chromocenter;chromosomal part;chromosome, centromeric region;condensed chromosome, centromeric region;cytoskeletal part;envelope;euchromatin;female pronucleus;heterochromatin;intracellular membrane-bounded organelle;intracellular non-membrane-bounded organelle;intracellular organelle;intracellular organelle part;intracellular part;male pronucleus;me…		Q9DCC5;P23198	Chromobox protein homolog 3	Cbx3
4.2188	3.8151	4.2065	6.3019	4.63557	0.12013	0.06582	0.06582	0.01034	0.0655275	82.26	9.75	0.12	-3.08	13.7413	15.2718	16.1868	15.3586	15.14	18.5069	17.8397	18.0925	18.7072	18.29	14.6148	14.0325	NaN	16.7236	15.12	NaN	NaN	NaN	NaN	NaN	cellular process;chordate embryonic development;developmental process;embryo development;embryo development ending in birth or egg hatching;ER to Golgi vesicle-mediated transport;establishment of localization;establishment of localization in cell;establishment of protein localization;Golgi vesicle transport;in utero embryonic development;intracellular protein transport;intracellular transport;pro…	binding;cation binding;ion binding;metal ion binding;transition metal ion binding;zinc ion binding	cell part;COPII vesicle coat;cytoplasmic part;cytoplasmic vesicle part;intracellular organelle part;intracellular part;macromolecular complex;membrane coat;membrane part;organelle part;protein complex;vesicle coat	Protein processing in endoplasmic reticulum	Q6NXL1	Sec24-related gene family, member D	Sec24d
4.9946	NaN	4.5194	3.7472	4.4204	0.12013	0.06582	0.06582	0.01034	0.0655275	81.55	9.75	0.12	-3.06	14.0571	NaN	16.8311	13.1481	14.68	16.1688	18.684	18.1802	15.2007	17.06	14.5678	NaN	NaN	16.494	15.53	NaN	NaN	NaN	NaN	NaN		adenyl nucleotide binding;adenyl ribonucleotide binding;ATP binding;binding;nucleotide binding;purine nucleotide binding;purine ribonucleoside triphosphate binding;purine ribonucleotide binding;ribonucleotide binding	cell part;centrosome;cytoplasm;cytoplasmic part;cytoskeletal part;dynactin complex;extracellular membrane-bounded organelle;extracellular organelle;extracellular region part;extracellular vesicular exosome;intracellular non-membrane-bounded organelle;intracellular organelle;intracellular organelle part;intracellular part;macromolecular complex;membrane;membrane-bounded organelle;membrane-bounded …		Q8R5C5	Beta-centractin	Actr1b
7.0142	8.012	7.5559	7.2398	7.45547	NaN	0.11432	0.12183	NaN	0.118075	88.17	10.56	0.12	-3.06	20.8092	21.21	20.1526	15.936	19.53	23.8189	24.3549	23.8819	20.6193	23.17	16.4658	22.4789	23.2063	18.7282	20.22	16.2773	18.3632	18.7472	NaN	17.8	acute inflammatory response;acute-phase response;biological regulation;carbohydrate metabolic process;cellular carbohydrate metabolic process;cellular macromolecule metabolic process;cellular metabolic process;cellular process;cellular protein metabolic process;defense response;glycosylation;inflammatory response;macromolecule glycosylation;macromolecule metabolic process;macromolecule modificati…	binding;endopeptidase inhibitor activity;endopeptidase regulator activity;enzyme binding;enzyme inhibitor activity;enzyme regulator activity;glycoprotein binding;identical protein binding;peptidase inhibitor activity;peptidase regulator activity;protease binding;protein binding;serine-type endopeptidase inhibitor activity	cell part;cytoplasmic part;endoplasmic reticulum;extracellular membrane-bounded organelle;extracellular organelle;extracellular region;extracellular region part;extracellular space;extracellular vesicular exosome;Golgi apparatus;intracellular membrane-bounded organelle;intracellular organelle;intracellular part;membrane-bounded organelle;membrane-bounded vesicle;organelle;vesicle	Complement and coagulation cascades	A0A0A0MQA3;P07758	Alpha-1-antitrypsin 1-1	Serpina1a
3.0722	5.7505	NaN	4.1883	4.337	0.12013	0.06582	0.25927	0.01034	0.11389	81.26	9.75	0.12	-3.06	19.1997	19.3648	NaN	18.4744	19.01	22.2285	21.7101	20.7433	20.9407	21.41	NaN	18.2034	19.4356	NaN	18.82	NaN	NaN	18.0502	NaN	NaN		binding;calcium ion binding;cation binding;ion binding;metal ion binding	cell part;cytoplasmic membrane-bounded vesicle;cytoplasmic part;cytoplasmic vesicle;endoplasmic reticulum;endoplasmic reticulum lumen;endoplasmic reticulum part;extracellular region;intracellular membrane-bounded organelle;intracellular organelle;intracellular organelle lumen;intracellular organelle part;intracellular part;melanosome;membrane;membrane-bounded organelle;membrane-bounded vesicle;me…		O35887;G3UWV3;Q6XLQ8;G3UXA3;G3UY49;G3V004;G3UWR0	Calumenin	Calu
4.3742	2.8349	5.2072	4.7932	4.30237	0.26944	0.06582	0.06582	0.01034	0.102855	81.14	9.75	0.12	-3.06	13.9126	14.7955	14.8548	13.9846	14.39	17.0278	16.3274	17.7957	17.2402	17.1	14.6502	12.3764	16.1141	14.4409	14.4	12.6824	NaN	NaN	NaN	NaN	acetyl-CoA metabolic process;anatomical structure development;biosynthetic process;carboxylic acid biosynthetic process;carboxylic acid metabolic process;cell differentiation;cellular biosynthetic process;cellular developmental process;cellular ketone metabolic process;cellular lipid metabolic process;cellular metabolic process;cellular process;cellular response to chemical stimulus;cellular resp…	[acyl-carrier-protein] S-acetyltransferase activity;[acyl-carrier-protein] S-malonyltransferase activity;3-hydroxyacyl-[acyl-carrier-protein] dehydratase activity;3-hydroxyoctanoyl-[acyl-carrier-protein] dehydratase activity;3-hydroxypalmitoyl-[acyl-carrier-protein] dehydratase activity;3-oxoacyl-[acyl-carrier-protein] reductase (NADPH) activity;3-oxoacyl-[acyl-carrier-protein] synthase activity;…	cell part;cytoplasm;cytoplasmic membrane-bounded vesicle;cytoplasmic part;cytoplasmic vesicle;extracellular membrane-bounded organelle;extracellular organelle;extracellular region part;extracellular vesicular exosome;glycogen granule;Golgi apparatus;intracellular membrane-bounded organelle;intracellular organelle;intracellular part;melanosome;membrane;membrane-bounded organelle;membrane-bounded v…	Fatty acid biosynthesis;Insulin signaling pathway	P19096	Fatty acid synthase;[Acyl-carrier-protein] S-acetyltransferase;[Acyl-carrier-protein] S-malonyltransferase;3-oxoacyl-[acyl-carrier-protein] synthase;3-oxoacyl-[acyl-carrier-protein] reductase;3-hydroxyacyl-[acyl-carrier-protein] dehydratase;Enoyl-[acyl-carrier-protein] reductase;Oleoyl-[acyl-carrier-protein] hydrolase	Fasn
4.4119	4.3455	NaN	3.9775	4.24497	0.12013	0.06582	0.17858	0.01034	0.0937175	80.93	9.75	0.12	-3.05	15.109	15.2067	NaN	13.9672	14.76	17.4228	17.3225	16.2672	16.0556	16.77	16.7479	16.0553	16.0305	17.3165	16.54	NaN	NaN	13.2639	NaN	NaN	biological regulation;catabolic process;cellular catabolic process;cellular macromolecule catabolic process;cellular macromolecule metabolic process;cellular metabolic process;cellular nitrogen compound metabolic process;cellular process;macromolecule catabolic process;macromolecule metabolic process;metabolic process;mRNA catabolic process;mRNA metabolic process;negative regulation of biological…	adenyl nucleotide binding;adenyl ribonucleotide binding;ATP binding;binding;nucleotide binding;purine nucleotide binding;purine ribonucleoside triphosphate binding;purine ribonucleotide binding;ribonucleotide binding	cell part;cytoplasm;cytoplasmic part;intracellular membrane-bounded organelle;intracellular organelle;intracellular organelle part;intracellular part;membrane-bounded organelle;nuclear body;nuclear part;nuclear speck;nucleoplasm part;nucleus;organelle;organelle part;perinuclear region of cytoplasm	Antigen processing and presentation;Endocytosis;MAPK signaling pathway;Measles;Protein processing in endoplasmic reticulum;Spliceosome;Toxoplasmosis	Q61696;P17879	Heat shock 70 kDa protein 1A;Heat shock 70 kDa protein 1B	Hspa1a;Hspa1b
NaN	1.974	NaN	6.2877	4.13085	0.26541	0.06582	0.06582	0.01034	0.101847	80.51	9.75	0.12	-3.05	NaN	20.4943	NaN	20.6269	20.56	21.9819	22.9306	21.9262	23.1813	22.51	21.6709	21.3074	21.5077	21.2268	21.43	18.7297	NaN	NaN	NaN	NaN	ATP-dependent chromatin remodeling;cellular component organization;cellular component organization at cellular level;cellular component organization or biogenesis;cellular component organization or biogenesis at cellular level;cellular macromolecular complex subunit organization;cellular process;chromatin modification;chromatin organization;chromatin remodeling;chromosome organization;histone exc…	binding;histone binding;protein binding	cell part;intracellular membrane-bounded organelle;intracellular organelle;intracellular part;membrane-bounded organelle;nucleus;organelle		A0A087WP98;A0A087WPN6;A0A087WQN2;P26350	Prothymosin alpha;Prothymosin alpha, N-terminally processed;Thymosin alpha	Ptma
3.8701	3.8798	3.8022	4.8021	4.08855	0.12013	0.42829	0.06582	0.01034	0.156145	80.35	9.75	0.12	-3.04	18.0678	18.1767	17.852	17.01	17.78	20.211	20.0907	19.7112	19.5285	19.89	NaN	18.1011	18.8664	19.9194	18.96	NaN	16.7507	NaN	NaN	NaN	90S preribosome assembly;anatomical structure development;anatomical structure morphogenesis;axial mesoderm development;biological regulation;biosynthetic process;cellular biosynthetic process;cellular component assembly;cellular component assembly at cellular level;cellular component organization;cellular component organization at cellular level;cellular component organization or biogenesis;cell…	structural constituent of ribosome;structural molecule activity	adherens junction;anchoring junction;cell junction;cell part;cell-substrate adherens junction;cell-substrate junction;cytoplasmic part;cytosolic large ribosomal subunit;eukaryotic 80S initiation complex;focal adhesion;intracellular organelle part;intracellular part;large ribosomal subunit;macromolecular complex;organelle part;ribonucleoprotein complex;translation initiation complex	Ribosome	Q9JJI8	60S ribosomal protein L38	Rpl38
4.6051	3.9342	4.2053	3.5986	4.0858	0.12013	0.22321	0.06582	0.01034	0.104875	80.34	9.75	0.12	-3.04	18.5553	17.9363	18.4327	18.4018	18.33	20.4105	19.8548	20.2671	20.1956	20.18	NaN	18.9095	NaN	18.75	18.83	NaN	16.4735	NaN	NaN	NaN	activation of caspase activity;anatomical structure development;biological regulation;cell cycle process;cellular component assembly;cellular component assembly at cellular level;cellular component organization;cellular component organization at cellular level;cellular component organization or biogenesis;cellular component organization or biogenesis at cellular level;cellular macromolecular comp…		cell part;cytoplasm;extracellular membrane-bounded organelle;extracellular organelle;extracellular region part;extracellular vesicular exosome;intracellular membrane-bounded organelle;intracellular non-membrane-bounded organelle;intracellular organelle;intracellular organelle part;intracellular part;membrane-bounded organelle;membrane-bounded vesicle;non-membrane-bounded organelle;nuclear part;nu…		Q9EST5	Acidic leucine-rich nuclear phosphoprotein 32 family member B	Anp32b
3.9078	NaN	4.1835	NaN	4.04565	0.12013	0.06582	0.06582	0.01034	0.0655275	80.18	9.75	0.12	-3.04	17.2894	NaN	14.5638	NaN	15.93	19.514	18.9905	16.3933	17.1495	18.01	16.2069	NaN	15.9273	16.1553	16.1	NaN	NaN	NaN	NaN	NaN	anatomical structure morphogenesis;biological regulation;biosynthetic process;cell morphogenesis;cell morphogenesis involved in differentiation;cellular biosynthetic process;cellular component morphogenesis;cellular component organization;cellular component organization or biogenesis;cellular developmental process;cellular macromolecule biosynthetic process;cellular macromolecule metabolic proces…	binding;DNA binding;nucleic acid binding;nucleotide binding;RNA binding	cell part;cytoplasm;intracellular membrane-bounded organelle;intracellular organelle;intracellular organelle part;intracellular part;macromolecular complex;membrane-bounded organelle;nuclear part;nucleoplasm;nucleus;organelle;organelle part;ribonucleoprotein complex;viral nucleocapsid;virion part		Q80XR6;Q20BD0;Q99020	Heterogeneous nuclear ribonucleoprotein A/B	Hnrnpab
4.0562	NaN	2.1059	5.6381	3.9334	0.12013	0.06582	0.17856	0.01034	0.0937125	79.73	9.75	0.12	-3.03	17.1596	NaN	15.2021	15.4834	15.95	19.4118	17.4495	17.4091	17.2552	17.88	NaN	16.9456	16.9934	17.024	16.99	NaN	NaN	14.6142	NaN	NaN	biological regulation;cellular component organization;cellular component organization at cellular level;cellular component organization or biogenesis;cellular component organization or biogenesis at cellular level;cellular process;chromatin modification;chromatin organization;chromosome organization;organelle organization;regulation of biological process;regulation of cellular metabolic process;r…	binding;DNA binding;histone binding;nucleic acid binding;protein binding	cell part;contractile fiber;cytoplasmic part;intracellular membrane-bounded organelle;intracellular non-membrane-bounded organelle;intracellular organelle;intracellular part;membrane-bounded organelle;non-membrane-bounded organelle;nucleus;organelle		Q7TNV0	Protein DEK	Dek
NaN	3.0736	3.2118	5.1932	3.8262	0.12013	0.06582	0.06582	0.37402	0.156448	79.28	9.75	0.12	-3.02	NaN	19.206	19.0781	18.3766	18.89	21.0135	20.8704	20.788	20.1959	20.72	NaN	19.673	NaN	19.5672	19.62	NaN	NaN	NaN	17.8585	NaN	biosynthetic process;cellular biosynthetic process;cellular macromolecule biosynthetic process;cellular macromolecule metabolic process;cellular metabolic process;cellular process;cellular protein metabolic process;macromolecule biosynthetic process;macromolecule metabolic process;metabolic process;primary metabolic process;protein metabolic process;translation	structural constituent of ribosome;structural molecule activity	cell part;cytoplasmic part;intracellular non-membrane-bounded organelle;intracellular organelle;intracellular part;macromolecular complex;non-membrane-bounded organelle;organelle;ribonucleoprotein complex;ribosome	Ribosome	P61358;A2A4Q0	60S ribosomal protein L27	Rpl27
3.4215	4.1904	3.915	3.6218	3.78718	0.12013	0.06582	0.30685	0.01034	0.125785	79.11	9.75	0.12	-3.02	17.5039	16.9522	16.6673	16.7942	16.98	19.3015	19.0679	19.1583	18.9743	19.13	NaN	14.6452	17.6123	NaN	16.13	NaN	NaN	16.0325	NaN	NaN	biological regulation;cellular macromolecule metabolic process;cellular metabolic process;cellular nitrogen compound metabolic process;cellular process;macromolecule metabolic process;metabolic process;mRNA metabolic process;mRNA processing;negative regulation of biological process;negative regulation of cellular metabolic process;negative regulation of cellular process;negative regulation of mac…	binding;C2H2 zinc finger domain binding;enzyme binding;nucleotide binding;protein binding;protein domain specific binding	cell part;intracellular organelle part;intracellular part;macromolecular complex;nuclear body;nuclear part;nuclear speck;nucleoplasm;nucleoplasm part;organelle part;protein complex;Prp19 complex;ribonucleoprotein complex;spliceosomal complex	Spliceosome	P26369;Q3KQM4	Splicing factor U2AF 65 kDa subunit	U2af2
4.2907	NaN	2.7867	3.8355	3.63763	0.12013	0.06582	0.06582	0.33629	0.147015	78.44	9.75	0.12	-3.01	16.2048	NaN	16.0519	14.7482	15.67	18.0921	17.7467	17.481	17.9677	17.82	NaN	13.7616	NaN	16.7525	15.26	NaN	NaN	NaN	15.5401	NaN	catabolic process;cell differentiation;cellular catabolic process;cellular component assembly;cellular component assembly at cellular level;cellular component organization;cellular component organization at cellular level;cellular component organization or biogenesis;cellular component organization or biogenesis at cellular level;cellular developmental process;cellular macromolecular complex asse…		cell part;extracellular membrane-bounded organelle;extracellular organelle;extracellular region part;extracellular vesicular exosome;intracellular membrane-bounded organelle;intracellular organelle;intracellular part;macromolecular complex;membrane;membrane-bounded organelle;membrane-bounded vesicle;nucleus;organelle;proteasome accessory complex;proteasome complex;proteasome regulatory particle;p…	Proteasome	Q8BG32;G3UXL5;G3UYH2;G3UZ28;G3UWW7	26S proteasome non-ATPase regulatory subunit 11	Psmd11
3.0387	NaN	NaN	4.118	3.57835	0.12013	0.06582	0.06582	0.25957	0.127835	78.16	9.75	0.12	-3	16.3206	NaN	16.57	14.0799	15.66	16.6956	16.9773	17.4767	16.2489	16.85	15.2163	15.9248	15.1057	15.6264	15.47	NaN	NaN	NaN	14.3179	NaN	cell differentiation;cellular developmental process;cellular process;developmental process;epithelial cell differentiation		extracellular membrane-bounded organelle;extracellular organelle;extracellular region part;extracellular vesicular exosome;membrane-bounded organelle;membrane-bounded vesicle;organelle;vesicle		Q9WVA4	Transgelin-2	Tagln2
3.3794	NaN	NaN	3.7015	3.54045	0.12013	0.06582	1.1607	0.01034	0.339248	77.98	9.75	0.13	-3	17.744	NaN	NaN	16.9619	17.35	18.516	NaN	NaN	19.1091	18.81	16.9843	NaN	16.5226	NaN	16.75	NaN	NaN	16.6877	NaN	NaN	anatomical structure development;anatomical structure morphogenesis;biomineral tissue development;bone mineralization;bone morphogenesis;cartilage development;cartilage development involved in endochondral bone morphogenesis;cellular component disassembly;cellular component disassembly at cellular level;cellular component organization;cellular component organization at cellular level;cellular com…	binding;calcium ion binding;catalytic activity;cation binding;collagen binding;endopeptidase activity;hydrolase activity;ion binding;metal ion binding;metalloendopeptidase activity;metallopeptidase activity;peptidase activity;peptidase activity, acting on L-amino acid peptides;protein binding;transition metal ion binding;zinc ion binding	extracellular matrix;extracellular region;extracellular region part;proteinaceous extracellular matrix		P33435	Collagenase 3	Mmp13
2.8677	NaN	3.372	4.2753	3.505	0.12013	0.06582	0.06582	0.66038	0.228038	77.8	9.75	0.13	-3	15.9108	NaN	15.857	15.2033	15.66	17.622	17.5064	17.2115	17.0156	17.34	17.0679	16.392	NaN	16.9165	16.79	NaN	NaN	NaN	15.9179	NaN	cellular process;ER to Golgi vesicle-mediated transport;establishment of localization;establishment of localization in cell;establishment of protein localization;establishment of RNA localization;Golgi vesicle transport;intracellular transport;mRNA transport;nucleic acid transport;nucleobase-containing compound transport;protein transport;RNA transport;transport;vesicle-mediated transport		cell part;chromosomal part;coated vesicle membrane;cytoplasmic part;cytoplasmic vesicle membrane;cytoplasmic vesicle part;endoplasmic reticulum;endoplasmic reticulum membrane;endoplasmic reticulum part;envelope;ER to Golgi transport vesicle membrane;extracellular membrane-bounded organelle;extracellular organelle;extracellular region part;extracellular vesicular exosome;intracellular membrane-bou…	Protein processing in endoplasmic reticulum;RNA transport	Q9D1M0	Protein SEC13 homolog	Sec13
3.332	NaN	NaN	2.8924	3.1122	0.12013	0.06582	0.06582	0.31061	0.140595	75.68	9.75	0.13	-2.96	17.8998	NaN	NaN	16.6472	17.27	19.4286	NaN	19.0476	18.4436	18.97	NaN	17.4172	NaN	18.1501	17.78	NaN	NaN	NaN	16.4851	NaN	biological regulation;cellular macromolecule metabolic process;cellular metabolic process;cellular nitrogen compound metabolic process;cellular process;establishment of localization;establishment of RNA localization;macromolecule metabolic process;metabolic process;mRNA metabolic process;mRNA processing;negative regulation of biological process;negative regulation of biosynthetic process;negative…	binding;DNA binding;nucleic acid binding;nucleotide binding;RNA binding;sequence-specific DNA binding;single-stranded DNA binding;single-stranded telomeric DNA binding;structure-specific DNA binding;telomeric DNA binding	catalytic step 2 spliceosome;cell part;cytoplasm;intracellular membrane-bounded organelle;intracellular organelle;intracellular organelle part;intracellular part;macromolecular complex;membrane;membrane-bounded organelle;nuclear part;nucleoplasm;nucleus;organelle;organelle part;ribonucleoprotein complex;spliceosomal complex		O88569	Heterogeneous nuclear ribonucleoproteins A2/B1	Hnrnpa2b1
3.2992	3.6744	2.4763	2.983	3.10823	0.12013	0.06582	0.06582	0.25364	0.126352	75.66	9.75	0.13	-2.96	20.5372	19.9126	19.9696	19.5401	19.99	22.0646	21.1896	21.2137	21.2322	21.43	18.1427	17.5924	NaN	19.9469	18.56	NaN	NaN	NaN	18.7824	NaN	biosynthetic process;cellular biosynthetic process;cellular macromolecule biosynthetic process;cellular macromolecule metabolic process;cellular metabolic process;cellular process;cellular protein metabolic process;macromolecule biosynthetic process;macromolecule metabolic process;metabolic process;primary metabolic process;protein metabolic process;translation	binding;nucleic acid binding;RNA binding;rRNA binding;structural constituent of ribosome;structural molecule activity	adherens junction;anchoring junction;cell junction;cell part;cell-substrate adherens junction;cell-substrate junction;cytoplasm;cytosolic large ribosomal subunit;focal adhesion;intracellular membrane-bounded organelle;intracellular non-membrane-bounded organelle;intracellular organelle;intracellular organelle part;intracellular part;large ribosomal subunit;macromolecular complex;membrane;membrane…	Ribosome	P51410;D3YZT0;D3Z629;A0A0G2JDK9;A0A0G2JES3;A0A0G2JFQ3	60S ribosomal protein L9	Rpl9
3.0813	3.2105	NaN	2.94	3.07727	0.32083	0.06582	0.06582	0.01034	0.115702	75.47	9.75	0.13	-2.95	15.4708	14.7332	NaN	14.7884	15	17.2071	16.5299	NaN	16.7579	16.83	15.2541	14.818	14.8257	15.839	15.18	13.7725	NaN	NaN	NaN	NaN			cell part;extracellular membrane-bounded organelle;extracellular organelle;extracellular region part;extracellular vesicular exosome;intracellular part;macromolecular complex;membrane;membrane-bounded organelle;membrane-bounded vesicle;organelle;proteasome accessory complex;proteasome complex;proteasome regulatory particle;protein complex;vesicle	Proteasome	Q3TRH2;Q9D8W5;B1AT36	26S proteasome non-ATPase regulatory subunit 12	Psmd12
2.0565	2.6025	NaN	4.0539	2.9043	0.12013	0.06582	0.06582	0.28111	0.13322	74.39	9.75	0.13	-2.93	16.1173	14.7659	NaN	15.1405	15.34	18.3662	17.5709	15.5231	17.1794	17.16	16.2408	14.9447	15.324	16.9376	15.86	NaN	NaN	NaN	13.8699	NaN	binding of sperm to zona pellucida;cell recognition;cell-cell recognition;cellular macromolecule metabolic process;cellular metabolic process;cellular process;cellular process involved in reproduction;cellular protein metabolic process;macromolecule metabolic process;metabolic process;primary metabolic process;protein folding;protein metabolic process;reproductive process;sperm-egg recognition	adenyl nucleotide binding;adenyl ribonucleotide binding;ATP binding;binding;nucleotide binding;purine nucleotide binding;purine ribonucleoside triphosphate binding;purine ribonucleotide binding;ribonucleotide binding	cell body;cell part;centrosome;chaperonin-containing T-complex;cytoplasm;cytoplasmic membrane-bounded vesicle;cytoplasmic part;cytoplasmic vesicle;cytoskeletal part;cytosolic part;extracellular membrane-bounded organelle;extracellular organelle;extracellular region part;extracellular vesicular exosome;intracellular membrane-bounded organelle;intracellular non-membrane-bounded organelle;intracellu…		G5E839;P80315	T-complex protein 1 subunit delta	Cct4
3.1985	2.7985	NaN	2.6994	2.8988	0.2001	0.06582	0.06582	0.01034	0.08552	74.35	9.75	0.13	-2.93	19.7231	19.1685	NaN	18.4243	19.11	21.7318	21.1927	19.6667	20.2613	20.71	19.838	18.2233	19.1673	19.0275	19.06	15.3476	NaN	NaN	NaN	NaN	biosynthetic process;cellular biosynthetic process;cellular macromolecule biosynthetic process;cellular macromolecule metabolic process;cellular metabolic process;cellular process;cellular protein metabolic process;macromolecule biosynthetic process;macromolecule metabolic process;metabolic process;primary metabolic process;protein metabolic process;translation	structural constituent of ribosome;structural molecule activity	cell part;cytosolic large ribosomal subunit;intracellular organelle part;intracellular part;large ribosomal subunit;macromolecular complex;membrane;organelle part;ribonucleoprotein complex	Ribosome	P14115	60S ribosomal protein L27a	Rpl27a
2.4207	2.8252	2.7825	3.0904	2.7797	0.12013	0.06582	0.06582	0.32234	0.143528	73.54	9.75	0.13	-2.91	18.775	18.0651	17.6962	17.2398	17.94	22.388	21.7857	20.9117	21.556	21.66	19.1438	NaN	17.8441	17.5126	18.17	NaN	NaN	NaN	16.3859	NaN	biosynthetic process;cellular biosynthetic process;cellular component biogenesis;cellular component biogenesis at cellular level;cellular component organization or biogenesis;cellular component organization or biogenesis at cellular level;cellular macromolecule biosynthetic process;cellular macromolecule metabolic process;cellular metabolic process;cellular nitrogen compound metabolic process;cel…	5S rRNA binding;binding;nucleic acid binding;RNA binding;rRNA binding;structural constituent of ribosome;structural molecule activity	adherens junction;anchoring junction;cell junction;cell part;cell-substrate adherens junction;cell-substrate junction;cytoplasm;cytosolic large ribosomal subunit;extracellular membrane-bounded organelle;extracellular organelle;extracellular region part;extracellular vesicular exosome;focal adhesion;intracellular membrane-bounded organelle;intracellular non-membrane-bounded organelle;intracellular…	Ribosome	P47962;D3YYV8	60S ribosomal protein L5	Rpl5
2.6432	2.9585	2.386	3.1006	2.77208	0.12013	0.36279	0.06582	0.01034	0.13977	73.49	9.75	0.13	-2.91	19.351	18.3238	18.0924	18.2167	18.5	21.2652	20.5558	20.616	20.7788	20.8	18.1346	18.1948	NaN	20.0301	18.79	NaN	16.5359	NaN	NaN	NaN	biosynthetic process;cellular biosynthetic process;cellular macromolecule biosynthetic process;cellular macromolecule metabolic process;cellular metabolic process;cellular process;cellular protein metabolic process;macromolecule biosynthetic process;macromolecule metabolic process;metabolic process;primary metabolic process;protein metabolic process;translation	structural constituent of ribosome;structural molecule activity	cell part;centrosome;cytoplasmic part;cytoskeletal part;cytosolic large ribosomal subunit;intracellular non-membrane-bounded organelle;intracellular organelle;intracellular organelle part;intracellular part;large ribosomal subunit;macromolecular complex;membrane;microtubule organizing center;non-membrane-bounded organelle;organelle;organelle part;ribonucleoprotein complex	Ribosome	P62911	60S ribosomal protein L32	Rpl32
3.0436	2.5289	2.1707	3.1889	2.73303	0.17574	0.06582	0.06582	0.01034	0.07943	73.21	9.75	0.13	-2.91	17.2513	18.481	18.4101	16.9146	17.76	19.3461	19.9	19.5253	18.5019	19.32	17.8446	17.8098	NaN	NaN	17.83	15.6369	NaN	NaN	NaN	NaN	anatomical structure homeostasis;biological regulation;bone resorption;catabolic process;cation homeostasis;cellular catabolic process;cellular cation homeostasis;cellular chemical homeostasis;cellular component organization;cellular component organization at cellular level;cellular component organization or biogenesis;cellular component organization or biogenesis at cellular level;cellular homeo…	binding;catalytic activity;GDP binding;GTP binding;GTPase activity;guanyl nucleotide binding;guanyl ribonucleotide binding;hydrolase activity;hydrolase activity, acting on acid anhydrides;hydrolase activity, acting on acid anhydrides, in phosphorus-containing anhydrides;nucleoside-triphosphatase activity;nucleotide binding;purine nucleotide binding;purine ribonucleoside triphosphate binding;purin…	cell part;cytoplasm;cytoplasmic membrane-bounded vesicle;cytoplasmic part;cytoplasmic vesicle;cytoplasmic vesicle membrane;cytoplasmic vesicle part;endocytic vesicle;endocytic vesicle membrane;endosome;extracellular membrane-bounded organelle;extracellular organelle;extracellular region part;extracellular vesicular exosome;Golgi apparatus;intracellular membrane-bounded organelle;intracellular org…	Amoebiasis;Endocytosis;ko05152;Phagosome	P51150	Ras-related protein Rab-7a	Rab7a
6.4254	7.1509	5.4932	5.9526	6.25552	NaN	0.13965	0.12135	NaN	0.1305	86.22	11.54	0.13	-2.9	14.9548	17.5695	19.3278	12.1823	16.01	19.4251	21.8374	22.2042	16.8357	20.08	13.5278	19.2506	20.4532	NaN	17.74	NaN	14.6124	16.6286	NaN	15.62	embryo implantation;reproductive process	endopeptidase inhibitor activity;endopeptidase regulator activity;enzyme inhibitor activity;enzyme regulator activity;peptidase inhibitor activity;peptidase regulator activity;serine-type endopeptidase inhibitor activity	extracellular region part;extracellular space		P28665	Murinoglobulin-1	Mug1
NaN	2.5935	2.4086	2.7778	2.5933	0.12013	0.06582	0.06582	0.01034	0.0655275	72.17	9.75	0.14	-2.89	NaN	13.9945	18.1504	17.1831	16.44	NaN	15.6658	19.0498	18.2866	17.67	17.0324	17.1881	NaN	NaN	17.11	NaN	NaN	NaN	NaN	NaN	behavior;behavioral defense response;behavioral fear response;cell communication;cell-cell signaling;cellular process;cognition;defense response;fear response;learning;learning or memory;multicellular organismal process;multicellular organismal response to stress;neurological system process;neuron-neuron synaptic transmission;response to stimulus;response to stress;signaling;synaptic transmission…	anion channel activity;anion transmembrane transporter activity;binding;channel activity;gated channel activity;ion channel activity;ion transmembrane transporter activity;nucleotide binding;passive transmembrane transporter activity;porin activity;substrate-specific channel activity;substrate-specific transmembrane transporter activity;substrate-specific transporter activity;transmembrane transp…	cell part;cytoplasmic part;extracellular membrane-bounded organelle;extracellular organelle;extracellular region part;extracellular vesicular exosome;intracellular membrane-bounded organelle;intracellular organelle;intracellular organelle part;intracellular part;macromolecular complex;membrane;membrane part;membrane-bounded organelle;membrane-bounded vesicle;mitochondrial inner membrane;mitochond…	Calcium signaling pathway;Huntington's disease;Parkinson's disease	Q60931;J3QMG3	Voltage-dependent anion-selective channel protein 3	Vdac3
3.1258	1.7535	2.6426	2.7884	2.57757	0.12013	0.06582	0.06582	0.01034	0.0655275	72.05	9.75	0.14	-2.88	17.4691	18.0737	16.1045	16.3406	17	19.6137	19.3096	18.0625	18.7839	18.94	18.6496	NaN	NaN	16.8342	17.74	NaN	NaN	NaN	NaN	NaN	activation of caspase activity;activation of immune response;activation of innate immune response;adaptive immune response;adaptive immune response based on somatic recombination of immune receptors built from immunoglobulin superfamily domains;B cell activation;B cell activation involved in immune response;B cell cytokine production;B cell mediated immunity;B cell proliferation;biological regula…	adenyl nucleotide binding;adenyl ribonucleotide binding;ATP binding;binding;chaperone binding;double-stranded RNA binding;enzyme binding;lipopolysaccharide binding;nucleic acid binding;nucleotide binding;p53 binding;protein binding;purine nucleotide binding;purine ribonucleoside triphosphate binding;purine ribonucleotide binding;ribonucleotide binding;RNA binding;ubiquitin protein ligase binding	cell part;cell surface;coated pit;coated vesicle;cyclin-dependent protein kinase activating kinase holoenzyme complex;cytoplasm;cytoplasmic membrane-bounded vesicle;cytoplasmic part;cytoplasmic vesicle;cytosol;early endosome;endosome;extracellular membrane-bounded organelle;extracellular organelle;extracellular region part;extracellular space;extracellular vesicular exosome;intracellular membrane…	ko05152;RNA degradation;Type I diabetes mellitus	P63038	60 kDa heat shock protein, mitochondrial	Hspd1
NaN	1.6185	NaN	3.4333	2.5259	0.12013	0.06582	0.06582	0.01034	0.0655275	71.64	9.75	0.14	-2.88	NaN	18.3818	NaN	13.1167	15.75	NaN	19.7292	NaN	14.9896	17.36	15.28	NaN	13.9775	17.206	15.49	NaN	NaN	NaN	NaN	NaN	biological regulation;negative regulation of apoptosis;negative regulation of biological process;negative regulation of cell death;negative regulation of cellular process;negative regulation of programmed cell death;regulation of apoptosis;regulation of biological process;regulation of cell death;regulation of cellular process;regulation of programmed cell death		actin cytoskeleton;adherens junction;anchoring junction;cell junction;cell part;cytoplasm;cytoplasmic part;cytoskeleton;cytosol;extracellular membrane-bounded organelle;extracellular organelle;extracellular region part;extracellular vesicular exosome;intracellular non-membrane-bounded organelle;intracellular organelle;intracellular organelle part;intracellular part;membrane;membrane-bounded organ…		Q8R1F1	Niban-like protein 1	Fam129b
2.8673	1.7255	2.1753	3.2318	2.49998	0.12013	0.06582	0.06582	0.39896	0.162683	71.43	9.75	0.14	-2.87	15.5255	13.6074	15.4829	14.229	14.71	18.9306	18.9686	18.9177	18.2605	18.77	NaN	NaN	13.0356	16.5612	14.8	NaN	NaN	NaN	14.8096	NaN	actin crosslink formation;actin cytoskeleton organization;actin filament bundle assembly;actin filament organization;actin filament-based process;biological regulation;cell junction assembly;cell junction organization;cell-substrate junction assembly;cellular component assembly;cellular component assembly at cellular level;cellular component organization;cellular component organization at cellula…	actin binding;actin filament binding;binding;calcium ion binding;cation binding;cytoskeletal protein binding;double-stranded RNA binding;identical protein binding;integrin binding;ion binding;ion channel binding;ligand-dependent nuclear receptor transcription coactivator activity;metal ion binding;nucleic acid binding;protein binding;protein binding transcription factor activity;protein complex b…	actin filament bundle;actomyosin;adherens junction;anchoring junction;brush border;cell cortex part;cell junction;cell part;cell projection;cell projection part;cell-cell adherens junction;cell-cell junction;cell-substrate adherens junction;cell-substrate junction;contractile fiber part;cortical actin cytoskeleton;cortical cytoskeleton;cytoplasm;cytoplasmic membrane-bounded vesicle;cytoplasmic pa…	Adherens junction;Amoebiasis;Arrhythmogenic right ventricular cardiomyopathy (ARVC);Focal adhesion;Leukocyte transendothelial migration;Regulation of actin cytoskeleton;Systemic lupus erythematosus;Tight junction	A1BN54;Q7TPR4	Alpha-actinin-1	Actn1
1.4662	NaN	2.8423	2.9904	2.43297	0.12013	0.25927	0.06582	0.01034	0.11389	70.87	9.75	0.14	-2.86	16.3786	NaN	14.8645	13.7884	15.01	15.904	15.655	15.9128	15.392	15.72	NaN	14.5554	15.3701	17.6432	15.86	NaN	13.6201	NaN	NaN	NaN	actin cytoskeleton organization;actin filament-based process;ameboidal cell migration;anatomical structure morphogenesis;cell migration;cell morphogenesis;cell motility;cellular component morphogenesis;cellular component movement;cellular component organization;cellular component organization at cellular level;cellular component organization or biogenesis;cellular component organization or biogen…		adherens junction;anchoring junction;cell cortex part;cell junction;cell part;cell-substrate adherens junction;cell-substrate junction;cortical actin cytoskeleton;cortical cytoskeleton;cytoplasm;cytoplasmic part;cytoskeletal part;cytoskeleton;cytosol;extracellular membrane-bounded organelle;extracellular organelle;extracellular region;extracellular region part;extracellular vesicular exosome;foca…		P40124	Adenylyl cyclase-associated protein 1	Cap1
NaN	3.8415	NaN	0.96819	2.40484	0.12013	0.06582	0.06582	0.01034	0.0655275	70.63	9.75	0.14	-2.86	NaN	14.3577	NaN	14.6907	14.52	17.43	17.4473	17.5746	17.4868	17.48	15.0996	14.7948	17.2836	15.6145	15.7	NaN	NaN	NaN	NaN	NaN	alternative nuclear mRNA splicing, via spliceosome;cellular macromolecule metabolic process;cellular metabolic process;cellular nitrogen compound metabolic process;cellular process;macromolecule metabolic process;metabolic process;mRNA metabolic process;mRNA processing;nitrogen compound metabolic process;nuclear mRNA splicing, via spliceosome;nucleic acid metabolic process;nucleobase-containing c…	binding;nucleotide binding;protein binding;protein domain specific binding	catalytic step 2 spliceosome;cell part;extracellular matrix;extracellular membrane-bounded organelle;extracellular organelle;extracellular region part;extracellular vesicular exosome;intracellular organelle part;intracellular part;macromolecular complex;membrane;membrane-bounded organelle;membrane-bounded vesicle;nuclear body;nuclear matrix;nuclear part;nucleoplasm;nucleoplasm part;organelle;orga…	Spliceosome	B8JK32;Q9D0E1;B8JK33	Heterogeneous nuclear ribonucleoprotein M	Hnrnpm
NaN	0.95122	NaN	3.7148	2.33301	0.12013	0.06582	0.06582	1.0502	0.325493	70	9.75	0.14	-2.84	NaN	20.5951	NaN	17.2773	18.94	NaN	20.2142	NaN	18.7912	19.5	NaN	NaN	19.6735	18.9069	19.29	NaN	NaN	NaN	19.1094	NaN	cellular component organization;cellular component organization or biogenesis;cellular membrane organization;cellular process;clathrin-mediated endocytosis;endocytosis;establishment of localization;establishment of localization in cell;establishment of protein localization;intracellular protein transport;intracellular transport;membrane invagination;membrane organization;protein transport;recepto…	binding;clathrin binding;clathrin heavy chain binding;peptide binding;protein binding;structural molecule activity	cell part;clathrin coat;clathrin coat of coated pit;clathrin coat of trans-Golgi network vesicle;clathrin complex;clathrin vesicle coat;cytoplasmic membrane-bounded vesicle;cytoplasmic part;cytoplasmic vesicle;cytoplasmic vesicle part;Golgi apparatus part;intracellular membrane-bounded organelle;intracellular organelle;intracellular organelle part;intracellular part;macromolecular complex;membran…	Bacterial invasion of epithelial cells;Endocrine and other factor-regulated calcium reabsorption;Endocytosis;Huntington's disease;Lysosome	B1AWE0;Q6PFA2;B1AWE1;B1AWD8;B1AWD9;O08585	Clathrin light chain A	Clta
2.0939	1.9273	2.6524	2.5245	2.29953	0.12013	0.06582	0.06582	0.24422	0.123997	69.69	9.75	0.14	-2.84	18.4543	18.2803	20.2499	17.8002	18.7	19.5025	19.4566	21.2913	19.5638	19.95	16.7444	NaN	NaN	19.2715	18.01	NaN	NaN	NaN	16.513	NaN	anatomical structure development;anion homeostasis;biological regulation;cellular anion homeostasis;cellular chemical homeostasis;cellular chloride ion homeostasis;cellular homeostasis;cellular ion homeostasis;cellular monovalent inorganic anion homeostasis;cellular process;chemical homeostasis;chloride ion homeostasis;developmental process;homeostatic process;ion homeostasis;monovalent inorganic…	adenyl nucleotide binding;adenyl ribonucleotide binding;ATP binding;binding;catalytic activity;creatine kinase activity;kinase activity;nucleotide binding;phosphotransferase activity, nitrogenous group as acceptor;purine nucleotide binding;purine ribonucleoside triphosphate binding;purine ribonucleotide binding;ribonucleotide binding;transferase activity;transferase activity, transferring phospho…	cell part;cytoplasmic part;extracellular membrane-bounded organelle;extracellular organelle;extracellular region part;extracellular vesicular exosome;intracellular membrane-bounded organelle;intracellular organelle;intracellular part;membrane-bounded organelle;membrane-bounded vesicle;mitochondrion;myelin sheath;organelle;vesicle	Arginine and proline metabolism	Q04447	Creatine kinase B-type	Ckb
4.237	NaN	6.7188	NaN	5.4779	NaN	0.16014	0.10957	NaN	0.134855	84.56	11.88	0.14	-2.83	19.4595	NaN	20.062	NaN	19.76	22.4069	22.7996	23.024	NaN	22.74	NaN	20.3197	21.0764	NaN	20.7	NaN	17.532	17.7808	NaN	17.66	biological regulation;negative regulation of catalytic activity;negative regulation of endopeptidase activity;negative regulation of hydrolase activity;negative regulation of molecular function;negative regulation of peptidase activity;regulation of biological process;regulation of catalytic activity;regulation of endopeptidase activity;regulation of hydrolase activity;regulation of metabolic pro…	endopeptidase inhibitor activity;endopeptidase regulator activity;enzyme inhibitor activity;enzyme regulator activity;peptidase inhibitor activity;peptidase regulator activity;serine-type endopeptidase inhibitor activity	blood microparticle;extracellular membrane-bounded organelle;extracellular organelle;extracellular region part;extracellular space;extracellular vesicular exosome;membrane-bounded organelle;membrane-bounded vesicle;organelle;vesicle		Q03734	Serine protease inhibitor A3M	Serpina3m
NaN	2.2623	NaN	2.2691	2.2657	0.12013	0.06582	0.06582	0.01034	0.0655275	69.38	9.75	0.14	-2.83	NaN	14.4327	NaN	15.2534	14.84	16.5076	15.7229	15.1472	15.9094	15.82	14.9527	NaN	NaN	15.5054	15.23	NaN	NaN	NaN	NaN	NaN	carboxylic acid catabolic process;carboxylic acid metabolic process;catabolic process;cellular catabolic process;cellular ketone metabolic process;cellular lipid catabolic process;cellular lipid metabolic process;cellular metabolic process;cellular process;electron transport chain;fatty acid beta-oxidation;fatty acid beta-oxidation using acyl-CoA dehydrogenase;fatty acid catabolic process;fatty a…	4 iron, 4 sulfur cluster binding;binding;catalytic activity;cation binding;cofactor binding;electron carrier activity;electron-transferring-flavoprotein dehydrogenase activity;ion binding;iron-sulfur cluster binding;metal cluster binding;metal ion binding;oxidoreductase activity;oxidoreductase activity, acting on the CH-NH group of donors;oxidoreductase activity, acting on the CH-NH group of dono…	cell part;cytoplasmic part;electron transfer flavoprotein complex;integral to membrane;integral to mitochondrial inner membrane;integral to mitochondrial membrane;integral to organelle membrane;intracellular membrane-bounded organelle;intracellular organelle;intracellular organelle part;intracellular part;intrinsic to membrane;intrinsic to mitochondrial inner membrane;intrinsic to organelle membr…		Q6PF96;Q921G7	Electron transfer flavoprotein-ubiquinone oxidoreductase, mitochondrial	Etfdh
2.5852	2.531	NaN	1.4226	2.1796	0.12013	0.06582	0.06582	0.01034	0.0655275	68.55	9.75	0.14	-2.81	16.963	17.0807	NaN	16.6605	16.9	20.4918	19.8878	17.1306	19.0533	19.14	NaN	NaN	17.4455	18.1557	17.8	NaN	NaN	NaN	NaN	NaN	multi-organism process;response to biotic stimulus;response to other organism;response to stimulus;response to virus	binding;nucleic acid binding;RNA binding;translation elongation factor activity;translation factor activity, nucleic acid binding	cell part;cytoplasm;extracellular membrane-bounded organelle;extracellular organelle;extracellular region part;extracellular vesicular exosome;intracellular membrane-bounded organelle;intracellular organelle;intracellular part;membrane;membrane-bounded organelle;membrane-bounded vesicle;nucleus;organelle;vesicle		Q9D8N0	Elongation factor 1-gamma	Eef1g
NaN	2.2502	2.0686	NaN	2.1594	0.12013	0.51016	0.06582	0.01034	0.176612	68.35	9.75	0.14	-2.81	NaN	14.9147	14.5742	NaN	14.74	15.5948	16.5492	17.4895	NaN	16.54	NaN	15.238	NaN	15.445	15.34	NaN	15.4691	NaN	NaN	NaN	acetyl-CoA catabolic process;acetyl-CoA metabolic process;carboxylic acid metabolic process;catabolic process;cellular catabolic process;cellular ketone metabolic process;cellular metabolic process;cellular process;coenzyme catabolic process;coenzyme metabolic process;cofactor catabolic process;cofactor metabolic process;dicarboxylic acid metabolic process;metabolic process;organic acid metabolic…	acid-thiol ligase activity;adenyl nucleotide binding;adenyl ribonucleotide binding;ATP binding;binding;catalytic activity;cation binding;CoA-ligase activity;ion binding;ligase activity;ligase activity, forming carbon-sulfur bonds;metal ion binding;nucleotide binding;purine nucleotide binding;purine ribonucleoside triphosphate binding;purine ribonucleotide binding;ribonucleotide binding;succinate-…	cell part;cytoplasmic part;extracellular membrane-bounded organelle;extracellular organelle;extracellular region part;extracellular vesicular exosome;intracellular membrane-bounded organelle;intracellular organelle;intracellular part;membrane-bounded organelle;membrane-bounded vesicle;mitochondrion;myelin sheath;organelle;vesicle	Citrate cycle (TCA cycle);Propanoate metabolism	Q9Z2I9	Succinyl-CoA ligase [ADP-forming] subunit beta, mitochondrial	Sucla2
1.8368	2.6243	2.0185	2.0019	2.12038	0.23102	0.06582	0.06582	0.01034	0.09325	67.95	9.75	0.14	-2.8	15.0194	15.1234	13.9758	14.0047	14.53	16.2341	16.4114	15.1756	15.1267	15.74	14.8995	14.6839	13.8924	14.6616	14.53	13.0168	NaN	NaN	NaN	NaN	behavior;biological adhesion;biological regulation;cell adhesion;cell adhesion mediated by integrin;cell differentiation;cell junction assembly;cell junction organization;cell migration;cell motility;cell surface receptor linked signaling pathway;cell-cell adhesion;cell-cell adhesion mediated by integrin;cell-substrate adhesion;cell-substrate junction assembly;cellular component assembly;cellular…	binding;cation binding;integrin binding;ion binding;metal ion binding;protein binding;protein complex binding;receptor binding	adherens junction;anchoring junction;cell junction;cell part;cell projection membrane;cell projection part;cell surface;cell-cell junction;cell-substrate adherens junction;cell-substrate junction;cytoplasmic part;cytoplasmic vesicle;endoplasmic reticulum;external side of plasma membrane;focal adhesion;Golgi apparatus;integrin complex;intracellular membrane-bounded organelle;intracellular organell…	Arrhythmogenic right ventricular cardiomyopathy (ARVC);Bacterial invasion of epithelial cells;Dilated cardiomyopathy;ECM-receptor interaction;Focal adhesion;Hematopoietic cell lineage;Hypertrophic cardiomyopathy (HCM);Phagosome;Regulation of actin cytoskeleton;Shigellosis	P11688	Integrin alpha-5;Integrin alpha-5 heavy chain;Integrin alpha-5 light chain	Itga5
1.2181	NaN	2.9614	NaN	2.08975	0.12013	0.06582	0.06582	0.01034	0.0655275	67.63	9.75	0.14	-2.79	14.5681	NaN	15.7897	NaN	15.18	17.5145	NaN	16.1412	15.9746	16.54	15.5152	NaN	NaN	15.2632	15.39	NaN	NaN	NaN	NaN	NaN	biological regulation;cellular component assembly;cellular component assembly at cellular level;cellular component organization;cellular component organization at cellular level;cellular component organization or biogenesis;cellular component organization or biogenesis at cellular level;cellular macromolecular complex assembly;cellular macromolecular complex subunit organization;cellular process;…	binding;nucleic acid binding;RNA binding;translation factor activity, nucleic acid binding;translation initiation factor activity	cell part;cytoplasm;cytoplasmic part;cytoskeletal part;eukaryotic 43S preinitiation complex;eukaryotic 48S preinitiation complex;eukaryotic translation initiation factor 3 complex;eukaryotic translation initiation factor 3 complex, eIF3m;intracellular membrane-bounded organelle;intracellular non-membrane-bounded organelle;intracellular organelle;intracellular organelle part;intracellular part;mac…	RNA transport	P23116	Eukaryotic translation initiation factor 3 subunit A	Eif3a
1.901	NaN	NaN	2.2738	2.0874	0.12013	0.06582	0.54239	0.01034	0.18467	67.61	9.75	0.14	-2.79	17.1679	NaN	NaN	15.7087	16.44	18.7	17.0938	NaN	18.2493	18.01	16.2813	15.3286	15.4995	16.2827	15.85	NaN	NaN	15.927	NaN	NaN	biological regulation;calcium ion homeostasis;cation homeostasis;cellular calcium ion homeostasis;cellular cation homeostasis;cellular chemical homeostasis;cellular divalent inorganic cation homeostasis;cellular homeostasis;cellular ion homeostasis;cellular metal ion homeostasis;cellular process;chemical homeostasis;divalent inorganic cation homeostasis;homeostatic process;ion homeostasis;metal i…		cell part;cytoplasmic part;integral to membrane;intracellular membrane-bounded organelle;intracellular organelle;intracellular organelle part;intracellular part;intrinsic to membrane;membrane;membrane part;membrane-bounded organelle;mitochondrial inner membrane;mitochondrial membrane;mitochondrial part;mitochondrion;myelin sheath;organelle;organelle inner membrane;organelle membrane;organelle part		E9Q800;Q8CAQ8;E9QAY6	MICOS complex subunit Mic60	Immt
2.44	9.1919	8.9831	9.9827	7.64943	0.18131	0.06582	NaN	0.12951	0.125547	92.44	13.45	0.15	-2.78	14.8555	NaN	NaN	NaN	NaN	16.2704	NaN	NaN	16.2541	16.26	17.0229	NaN	NaN	19.1532	18.09	14.0141	NaN	NaN	15.8318	14.92	actin cytoskeleton organization;actin filament organization;actin filament-based process;anatomical structure homeostasis;biological adhesion;biological regulation;calcium ion transport;cation transport;cell adhesion;cell chemotaxis;cell migration;cell motility;cell projection organization;cell-substrate adhesion;cellular component assembly;cellular component assembly at cellular level;cellular c…	actin binding;actin filament binding;binding;cytoskeletal protein binding;enzyme binding;identical protein binding;kinase binding;phosphatidylinositol 3-kinase binding;protein binding;protein C-terminus binding;protein dimerization activity;protein homodimerization activity	actin filament;axon;cell cortex part;cell junction;cell leading edge;cell part;cell projection;cell-cell junction;cortical actin cytoskeleton;cortical cytoskeleton;cytoplasm;cytoplasmic membrane-bounded vesicle;cytoplasmic part;cytoplasmic vesicle;cytoplasmic vesicle membrane;cytoplasmic vesicle part;cytoskeletal part;cytoskeleton;early endosome;endocytic vesicle;endocytic vesicle membrane;endoso…	ko05152;Phagosome	O89053	Coronin-1A	Coro1a
7.5232	7.859	7.7878	NaN	7.72333	NaN	0.15649	0.14009	NaN	0.14829	88.54	12.91	0.15	-2.78	21.5369	22.803	23.0192	NaN	22.45	24.5835	25.8714	26.1553	16.2281	23.21	NaN	22.1489	23.1048	17.1838	20.81	15.232	19.0597	20.1463	NaN	18.15	biological regulation;negative regulation of catalytic activity;negative regulation of endopeptidase activity;negative regulation of hydrolase activity;negative regulation of molecular function;negative regulation of peptidase activity;regulation of biological process;regulation of catalytic activity;regulation of endopeptidase activity;regulation of hydrolase activity;regulation of metabolic pro…	binding;endopeptidase inhibitor activity;endopeptidase regulator activity;enzyme binding;enzyme inhibitor activity;enzyme regulator activity;glycoprotein binding;identical protein binding;peptidase inhibitor activity;peptidase regulator activity;protease binding;protein binding;serine-type endopeptidase inhibitor activity	cell part;cytoplasmic part;endoplasmic reticulum;extracellular membrane-bounded organelle;extracellular organelle;extracellular region;extracellular region part;extracellular space;extracellular vesicular exosome;Golgi apparatus;intracellular membrane-bounded organelle;intracellular organelle;intracellular part;membrane-bounded organelle;membrane-bounded vesicle;organelle;vesicle	Complement and coagulation cascades	Q00896	Alpha-1-antitrypsin 1-3	Serpina1c
1.8151	2.1953	NaN	NaN	2.0052	0.12013	0.06582	0.06582	0.11729	0.092265	66.72	9.75	0.15	-2.77	19.0377	17.6237	NaN	NaN	18.33	20.8997	19.7844	17.6946	NaN	19.46	NaN	17.3734	NaN	17.4875	17.43	NaN	NaN	NaN	13.8112	NaN	cellular macromolecule metabolic process;cellular metabolic process;cellular nitrogen compound metabolic process;cellular process;macromolecule metabolic process;metabolic process;mRNA metabolic process;mRNA processing;nitrogen compound metabolic process;nuclear mRNA splicing, via spliceosome;nucleic acid metabolic process;nucleobase-containing compound metabolic process;primary metabolic process…	adenyl nucleotide binding;adenyl ribonucleotide binding;ATP binding;ATPase activity;ATPase activity, coupled;ATP-dependent helicase activity;ATP-dependent RNA helicase activity;binding;catalytic activity;double-stranded RNA binding;helicase activity;hydrolase activity;hydrolase activity, acting on acid anhydrides;hydrolase activity, acting on acid anhydrides, in phosphorus-containing anhydrides;n…	cell part;cytoplasm;intracellular membrane-bounded organelle;intracellular non-membrane-bounded organelle;intracellular organelle;intracellular organelle part;intracellular part;macromolecular complex;membrane-bounded organelle;non-membrane-bounded organelle;nuclear part;nucleolus;nucleoplasm;nucleus;organelle;organelle part;post-mRNA release spliceosomal complex;ribonucleoprotein complex;spliceo…	Spliceosome	A0A0G2JGQ5;A0A0G2JG10;Q497W9;O35286	Pre-mRNA-splicing factor ATP-dependent RNA helicase DHX15	Dhx15
19.262	9.1919	8.9831	9.9827	11.8549	0.20091	NaN	NaN	0.11157	0.15624	92.44	13.51	0.15	-2.77	NaN	NaN	NaN	NaN	NaN	NaN	16.953	16.9677	17.7157	17.21	16.7961	NaN	NaN	16.974	16.89	14.6287	NaN	NaN	14.3731	14.5	biological regulation;cell differentiation;cellular developmental process;cellular macromolecule metabolic process;cellular metabolic process;cellular nitrogen compound metabolic process;cellular process;cellular response to chemical stimulus;cellular response to cytokine stimulus;cellular response to interferon-gamma;cellular response to organic substance;cellular response to stimulus;CRD-mediat…	binding;mRNA binding;nucleic acid binding;nucleotide binding;poly(A) RNA binding;poly-purine tract binding;RNA binding;single-stranded RNA binding	catalytic step 2 spliceosome;cell part;CRD-mediated mRNA stability complex;cytoplasm;cytoplasmic part;histone pre-mRNA 3'end processing complex;intracellular organelle part;intracellular part;macromolecular complex;membrane;nuclear part;organelle part;protein complex;ribonucleoprotein complex;spliceosomal complex		Q7TMK9;G3UXJ6;G3UZ48;G3UZI2;G3V018;G3UWM1	Heterogeneous nuclear ribonucleoprotein Q	Syncrip
NaN	2.1384	1.7731	NaN	1.95575	0.12013	0.51714	0.06582	0.01034	0.178358	66.17	9.75	0.15	-2.76	NaN	18.1459	17.7766	NaN	17.96	17.2541	19.4008	18.2004	18.0691	18.23	16.5076	17.442	NaN	17.4036	17.12	NaN	16.5807	NaN	NaN	NaN	cellular macromolecule metabolic process;cellular metabolic process;cellular nitrogen compound metabolic process;cellular process;macromolecule metabolic process;metabolic process;mRNA metabolic process;mRNA processing;nitrogen compound metabolic process;nucleic acid metabolic process;nucleobase-containing compound metabolic process;primary metabolic process;RNA metabolic process;RNA processing	binding;DNA binding;nucleic acid binding;nucleotide binding;regulatory region DNA binding;regulatory region nucleic acid binding;transcription regulatory region DNA binding	cell part;cytoplasm;extracellular membrane-bounded organelle;extracellular organelle;extracellular region part;extracellular vesicular exosome;intracellular membrane-bounded organelle;intracellular organelle;intracellular organelle part;intracellular part;macromolecular complex;membrane;membrane-bounded organelle;membrane-bounded vesicle;nuclear part;nucleoplasm;nucleus;organelle;organelle part;p…		G3UY38;G5E924;Q8R081	Heterogeneous nuclear ribonucleoprotein L	Hnrnpl
NaN	2.4021	1.1692	NaN	1.78565	0.12013	0.26376	0.06582	0.01034	0.115013	64.1	9.75	0.15	-2.72	NaN	15.5796	15.9973	NaN	15.79	NaN	17.3403	18.72	NaN	18.03	17.1088	16.4454	14.0587	16.4165	16.01	NaN	14.6453	NaN	NaN	NaN	biological regulation;biosynthetic process;cellular biosynthetic process;cellular metabolic process;cellular nitrogen compound biosynthetic process;cellular nitrogen compound metabolic process;cellular process;circadian regulation of gene expression;circadian rhythm;coenzyme biosynthetic process;coenzyme metabolic process;cofactor biosynthetic process;cofactor metabolic process;female pregnancy;h…	binding;catalytic activity;drug binding;nicotinamide phosphoribosyltransferase activity;nicotinate-nucleotide diphosphorylase (carboxylating) activity;transferase activity;transferase activity, transferring glycosyl groups;transferase activity, transferring pentosyl groups	cell part;cytoplasm;cytoplasmic part;cytosol;extracellular membrane-bounded organelle;extracellular organelle;extracellular region part;extracellular space;extracellular vesicular exosome;intracellular membrane-bounded organelle;intracellular organelle;intracellular part;membrane-bounded organelle;membrane-bounded vesicle;nucleus;organelle;vesicle	Nicotinate and nicotinamide metabolism	Q99KQ4	Nicotinamide phosphoribosyltransferase	Nampt
[truncated: 451 more rows]

## Sheet: Bone
Ratio H/L A1	Ratio H/L A2	Ratio H/L A3	Ratio H/L A4	Mean Ratio H/L A	Ratio H/L B1	Ratio H/L B2	Ratio H/L B3	Ratio H/L B4	Mean Ratio H/L B	% Heavy isotope A	% Heavy isotope B	Fold change	Log fold change	iBAQ L A1	iBAQ L A2	iBAQ L A3	iBAQ L A4	iBAQ L A	iBAQ H A1	iBAQ H A2	iBAQ H A3	iBAQ H A4	iBAQ H A	iBAQ L B1	iBAQ L B2	iBAQ L B3	iBAQ L B4	iBAQ L B	iBAQ H B1	iBAQ H B2	iBAQ H B3	iBAQ H B4	iBAQ H B	GOBP name	GOMF name	GOCC name	KEGG name	Majority protein IDs	Protein names	Gene names	matrisome
[truncated: 712 more rows]

[truncated: 2 more sheets: Skin, % Stable&Fast turnover proteins]
