# Supplementary material for: Age-dependent changes in protein incorporation into collagen-rich tissues of mice by in vivo pulsed SILAC labelling
Source: eLife. 2021 Sep 28;10:e66635. doi: 10.7554/eLife.66635 (PMC8478409; doi:10.7554/eLife.66635)
Supplement: Figure 4—source data 1. — Percentage of new collagen incorporation in the three collagenous tissues. Cartilage, bone, and skin of skeletally growing mice (group A), young adults (group C), and older adults (group D). Mean ± SD, n = 4, Pairwise comparisons using Student’s t-test, p<0.05 significant. [file elife-66635-fig4-data1.xlsx]

## Sheet: Sheet1
CARTILAGE	H/L Mouse 7 weeks				% Incorporation Mouse 7 weeks						H/L Mouse 15 weeks				% Incorporation Mouse 15 weeks						H/L Mouse 45 weeks				% Incorporation Mouse 45 weeks						TTEST							BONE	H/L Mouse 7 weeks				% Incorporation Mouse 7 weeks						H/L Mouse 15 weeks
Collagen type	H/L 1	H/L 2	H/L 3	H/L 4	% Incorporation 1	% Incorporation 2	% Incorporation 3	% Incorporation 4	Mean % Incorporation 4-7 weeks	SD 4-7w	H/L 1	H/L 2	H/L 3	H/L 4	% Incorporation 1	% Incorporation 2	% Incorporation 3	% Incorporation 4	Mean % Incorporation 12-15 weeks	SD 12-15 w	H/L 1	H/L 2	H/L 3	H/L 4	% Incorporation 1	% Incorporation 2	% Incorporation 3	% Incorporation 4	Mean % Incorporation 42-45 weeks	SD 42-45 w	Student ttest p value_comparison 7&15 weeks	Student ttest q value_comparison 7&15 weeks_BH correction	Student ttest p value_comparison 7&45 weeks	Student ttest q value_comparison 7&45 weeks_BH correction	Student ttest p value_comparison 15&45 weeks	Student ttest q value_comparison 15&45 weeks_BH correction		Collagen type	H/L 1	H/L 2	H/L 3	H/L 4	% Incorporation 1	% Incorporation 2	% Incorporation 3	% Incorporation 4	Mean % Incorporation 4-7 weeks	SD 4-7w	H/L 1
1a1	0.25516	0.40915	0.41242	0.74936	20.3289	29.0352	29.1995	42.8362	30.35	9.29841	0.039604	0.03845	0.019759	0.042594	3.80953	3.70263	1.93761	4.08539	3.38379	0.97751	0.029862	0.063502	0.011855	0.01863	2.89961	5.97103	1.17161	1.82893	2.96779	2.12504	0.00118499	0.00137209	0.00121357	0.00182035	0.733293	1	#	1a1	2.2477	1.5099	0.98807	0.93606	69.209	60.1578	49.7	48.3487	56.8539	9.78231	0.16401
1a2	0.23872	0.42134	0.3979	0.72418	19.2715	29.6439	28.4641	42.0014	29.8452	9.33675	0.042139	0.041789	0.017512	0.039892	4.04351	4.01127	1.72106	3.83617	3.403	1.12499	0.020773	0.055526	0.012086	0.013449	2.03503	5.26051	1.19417	1.32705	2.45419	1.90693	0.00135217	0.00148739	0.00120675	0.00182035	0.424876	0.89224	#	1a2	2.3516	1.4928	1.0005	0.90409	70.1635	59.8845	50.0125	47.4815	56.8855	10.3436	0.16046
2a1	0.589	0.74246	0.70113	0.83668	37.0673	42.6099	41.2155	45.5539	41.6117	3.52825	0.033205	0.0205	0.020412	0.029	3.21379	2.00882	2.00037	2.81827	2.51031	0.605874	0.014001	0.023488	0.011394	0.0094214	1.38077	2.2949	1.12656	0.933347	1.43389	0.602536	5.98058e-07	3.76487e-06	5.08375e-07	3.24896e-06	0.0447391	0.134217	#	2a1	1.7935		0.57415	0.58995	64.2026		36.4737	37.1049	45.9271	15.8302
3a1	0.36389	0.46855	0.54888	0.60856	26.6803	31.9056	35.4372	37.8326	32.9639	4.8451	0.053699	0.057777	0.035702	0.047654	5.09624	5.46212	3.44713	4.54864	4.63853	0.878503	0.058088	0.081977	0.033098	0.051226	5.4899	7.57659	3.20376	4.87298	5.28581	1.8069	2.5887e-05	4.06796e-05	3.92339e-05	6.86593e-05	0.544996	0.953742	#	3a1	1.7794	1.3917	0.98089	0.87776	64.021	58.1887	49.5176	46.7451	54.6181	7.94069	0.23143
4a1									ND										ND										ND									4a1									ND		Light only
4a2	1.6695	1.6947	1.5918	2.0467	62.5398	62.8901	61.4168	67.1776	63.5061	2.52708	0.23987	0.16326	0.28651	0.25359	19.3464	14.0347	22.2703	20.2291	18.9701	3.51076	0.16073	0.31533	0.24863	0.17881	13.8473	23.9735	19.9122	15.1687	18.2254	4.63309	8.55652e-07	3.76487e-06	2.50005e-06	7.50015e-06	0.806237	1	#	4a2									ND
5a1	0.62559	0.56877	0.61476	0.9149	38.4839	36.2558	38.0713	47.778	40.1472	5.1784	0.05033	0.045676	0.04304	0.036019	4.79183	4.36808	4.1264	3.47667	4.19075	0.549784	0.09883	0.086333	0.024726	0.083011	8.99411	7.94719	2.41294	7.66483	6.75477	2.95049	0.000508126	0.000621043	3.01661e-05	5.75898e-05	0.00178502	0.00937136	*	5a1	2.7347	1.8476	1.136	2.1532	73.2241	64.8827	53.1835	68.2862	64.8941	8.52511	0.34184
5a2	0.5347	0.66508	0.65304	0.77624	34.8407	39.9428	39.5054	43.7013	39.4976	3.63117	0.04187	Light only	0.033171	0.059991	4.01874		3.2106	5.65958	4.2963	1.24786	0.015787	0.080765	Light only	Light only	1.55416	7.47295			4.51356	4.18521	1.27975e-06	4.14582e-06	3.72636e-06	9.78169e-06	0.806323	1	#	5a2	3.562	2.2073	1.4644	1.3584	78.0798	68.8211	59.4222	57.5984	65.9804	9.44693	Light only
5a3									ND		Light only	Light only	Light only	Light only	0	0	0	0	0	0	Light only	0.098302	Light only	Light only					NQ									5a3			0.97215	0.89997			59.4222	57.5984	58.5103	1.28962
6a1	0.36598	0.43144	0.39602	0.53127	26.7925	30.1403	28.3678	34.6947	29.9988	3.41626	0.039528	0.046543	0.035299	0.048021	3.80249	4.44731	3.40955	4.58206	4.06035	0.551349	0.027488	0.048468	0.024709	0.020801	2.67526	4.62274	2.41132	2.03771	2.93676	1.15402	5.53433e-06	1.21755e-05	5.4907e-06	1.28116e-05	0.129289	0.339383	#	6a1	1.275	1.2649	1.1336	1.1282	56.044	55.8479	53.1309	53.0119	54.5087	1.66226	0.32994
6a2	0.42342	0.4222	0.42591	0.52805	29.7467	29.6864	29.8693	34.5571	30.9649	2.39603	0.044643	0.048955	0.044181	0.050287	4.27352	4.66703	4.23116	4.78793	4.48991	0.279262	0.033909	0.04389	0.032299	0.029723	3.27969	4.20447	3.12884	2.8865	3.37488	0.576287	5.8447e-07	3.76487e-06	5.18052e-07	3.24896e-06	0.0129486	0.0543843	#	6a2	0.58602	1.1056	1.1066	1.1514	36.9491	52.5076	52.5301	53.5186	48.8764	7.96548	0.22319
6a3	0.42706	0.45634	0.4514	0.57786	29.9259	31.3347	31.101	36.623	32.2462	2.98233	0.051046	0.051238	0.049626	0.055643	4.85669	4.87406	4.72797	5.27101	4.93243	0.234934	0.03701	0.049318	0.04304	0.035912	3.56891	4.70001	4.1264	3.4667	3.96551	0.569053	1.73092e-06	4.76003e-06	1.53851e-06	5.38478e-06	0.0200385	0.0701347	#	6a3	2.0602	1.4518	1.2199	1.3101	67.3224	59.2136	54.9529	56.7118	59.5502	5.46844	0.31083
6a5									ND										ND										ND									6a5									ND
7a1									ND										ND										ND									7a1									ND
8a1									ND										ND										ND									8a1									ND		Light only
8a2									ND										ND										ND									8a2									ND
9a1	0.36997	0.49869	0.50685	0.6779	27.0057	33.2751	33.6364	40.4017	33.5797	5.47275	Light only	Light only	Light only	Light only	0	0	0	0	0	0									ND		1.77817e-05	3.00921e-05	1	1	1	1	&	9a1									ND
9a2	0.53932	0.60143	0.5715	0.7078	35.0362	37.5558	36.3665	41.4451	37.6009	2.76172	0.0088256	Light only	0.011195	0.010336	0.874839		1.10711	1.02303	1.00166	0.117599	Light only	Light only	Light only	Light only	0	0	0	0	0		1.91195e-07	3.76487e-06	1	1	1	1	&	9a2									ND
9a3	0.32403	0.36929	0.38695	0.54232	24.473	26.9695	27.8993	35.1626	28.6261	4.59154									ND										ND									9a3									ND
10a1	2.1732	3.0312	3.3389	2.7236	68.4861	75.1935	76.9527	73.1443	73.4441	3.65342	0.2987	0.43956	0.19361	0.25824	22.9999	30.5343	16.2205	20.5239	22.5697	6.00326	0.17303	0.2838	0.17997	0.29407	14.7507	22.1062	15.2521	22.7244	18.7084	4.29276	6.78845e-06	1.35769e-05	1.20511e-06	5.06148e-06	0.33579	0.783509	#	10a1									ND
11a1	1.4158	1.4731	1.4476	2.26	58.6058	59.5649	59.1437	69.3252	61.6599	5.12523	0.17581	0.11503	0.11648	0.14633	14.9522	10.3163	10.4328	12.7651	12.1166	2.20134	0.042334	0.034471	0.06509	0.045843	4.06146	3.33223	6.11122	4.38335	4.47207	1.17792	2.04977e-06	5.01056e-06	6.1885e-07	3.24896e-06	0.00086365	0.00906833	*	11a1	2.8754	2.0703	1.9925	2.6596	74.1962	67.4299	66.5831	72.6746	70.221	3.77919	0.17656
11a2	0.79223	0.92425	0.78842	1.0971	44.2036	48.0317	44.0847	52.3151	47.1588	3.89584	0.065788	0.047308	0.042647	0.062083	6.17271	4.5171	4.09026	5.8454	5.15637	1.00879	Light only	Light only	Light only	Light only	0	0	0	0	0		7.91991e-07	3.76487e-06	1	1	1	1	&	11a2	3.1866	2.2478	1.901	1.9461	76.1143	69.2099	65.5291	66.0568	69.2275	4.87029	Light only
12a1	0.25763	0.28112	0.31508	0.37532	20.4854	21.9433	23.959	27.2896	23.4193	2.94717	0.026612	0.02585	0.037109	0.026012	2.59222	2.51986	3.57812	2.53525	2.80636	0.515445	0.022423	0.039942	0.037575	0.029954	2.19312	3.84079	3.62142	2.90829	3.14091	0.746802	9.0773e-06	1.66417e-05	1.09626e-05	2.30214e-05	0.491601	0.938512	#	12a1	3.0208	2.146	3.5356	3.3761	75.1293	68.2136	77.9522	77.1486	74.6109	4.42713	0.96993
14a1	0.45889	0.53367	0.60708	0.64478	31.4547	34.7969	37.7753	39.2016	35.8072	3.43318	0.098904	Light only	0.24626	0.10975	9.00024		19.7599	9.88961	12.8833	5.97194	0.40323	0.50306	0.34597	Light only	28.7358	33.4691	25.7041		29.303	3.91341	0.000253744	0.000348898	0.032321	0.0424213	0.00134057	0.00937136	*	14a1									ND
15a1	1.6969	1.7705	1.5264	1.5344	62.9204	63.9054	60.418	60.5429	61.9467	1.7409	0.13961	0.22177	0.15973	0.28199	12.2507	18.1515	13.773	21.9963	16.5429	4.41295	Light only	0.24698	0.13397	0.15655		19.8063	11.8142	13.5359	15.0521	4.20621	1.31913e-06	4.14582e-06	3.16198e-07	3.24896e-06	0.613443	0.990947	#	15a1									ND		1.2112
16a1	0.31441	0.5875	0.37239	Light only	23.9202	37.0079	27.1344		29.3542	6.82034	Light only	Light only	0.019497	0.036357			1.91241	3.50815	2.71028	1.12836									ND		7.74946e-05	0.000113659	1	1	1	1	&	16a1									ND
22a1	0.26362	Light only	0.15157	0.38169	20.8623		13.162	27.6249	20.5497	7.23648	Light only	Light only	Light only	Light only	0	0	0	0	0	0	0.10919	Light only	0.081389	0.12973	9.84412		7.52634	11.4833	9.61791	1.98814	0.000438053	0.000566892	0.0118041	0.0165257	2.16152e-05	0.000453919	*	22a1	2.7855	1.3913	1.3235	1.2499	73.5834	58.1817	56.9615	55.5536	61.0701	8.41107
[truncated: 64 more columns]
