# Supplementary material for: Age-dependent changes in protein incorporation into collagen-rich tissues of mice by in vivo pulsed SILAC labelling
Source: eLife. 2021 Sep 28;10:e66635. doi: 10.7554/eLife.66635 (PMC8478409; doi:10.7554/eLife.66635)
Supplement: Figure 5—source data 1. — Percentage of new proteoglycan incorporation in the three collagenous tissues. Cartilage, bone, and skin of skeletally growing mice (group A), young adults (group C), and older adults (group D). Mean ± SD, n = 4, Pairwise comparisons using Student’s t-test, p<0.05 significant. [file elife-66635-fig5-data1.xlsx]

## Sheet: Sheet1
CARTILAGE	H/L Mouse 7 weeks				% Incorporation Mouse 7 weeks						H/L Mouse 15 weeks				% Incorporation Mouse 15 weeks						H/L Mouse 45 weeks				% Incorporation Mouse 45 weeks													BONE	H/L Mouse 7 weeks				% Incorporation Mouse 7 weeks						H/L Mouse 15 weeks
CARTILAGE	H/L Mouse 7 weeks				% Incorporation Mouse 7 weeks						H/L Mouse 15 weeks				% Incorporation Mouse 15 weeks						H/L Mouse 45 weeks				% Incorporation Mouse 45 weeks						TTEST							BONE	H/L Mouse 7 weeks				% Incorporation Mouse 7 weeks						H/L Mouse 15 weeks
Proteoglycan type	H/L 1	H/L 2	H/L 3	H/L 4	% Incorporation 1	% Incorporation 2	% Incorporation 3	% Incorporation 4	Mean % Incorporation 4-7 weeks	SD 4-7w	H/L 1	H/L 2	H/L 3	H/L 4	% Incorporation 1	% Incorporation 2	% Incorporation 3	% Incorporation 4	Mean % Incorporation 12-15 weeks	SD 12-15 w	H/L 1	H/L 2	H/L 3	H/L 4	% Incorporation 1	% Incorporation 2	% Incorporation 3	% Incorporation 4	Mean % Incorporation 42-45 weeks	SD 42-45 w	Studen ttest p value_comparison 7&15 weeks	Studen ttest q value_comparison 7&15 weeks_BH correction	Studen ttest p value_comparison 7&45 weeks	Studen ttest q value_comparison 7&45 weeks_BH correction	Studen ttest p value_comparison 15&45 weeks	Studen ttest q value_comparison 15&45 weeks_BH correction		Proteoglycan type	H/L 1	H/L 2	H/L 3	H/L 4	% Incorporation 1	% Incorporation 2	% Incorporation 3	% Incorporation 4	Mean % Incorporation 4-7 weeks	SD 4-7w	H/L 1
Aggrecan	2.0329	2.1684	2.105	2.3446	67.0283	68.4383	67.7939	70.1011	68.3404	1.30766	0.50621	0.65276	0.56582	0.60224	33.6082	39.4951	36.1357	37.5874	36.7066	2.48179	0.35409	0.36249	0.29792	0.27202	26.1497	26.605	22.9536	21.3849	24.2733	2.51938	4.98427e-07	1.18376e-06	7.4201e-08	2.01403e-07	0.000413023	0.000826047	*	Aggrecan									ND
Asporin	0.99118	1.0456	1.3315	1.419	49.7785	51.1146	57.1092	58.6606	54.1657	4.37511	0.28219	0.31682	0.31451	0.31556	22.0084	24.0595	23.926	23.9867	23.4952	0.992655	0.28933	0.27333	0.31021	0.27243	22.4403	21.4658	23.6764	21.4102	22.2482	1.06317	9.52166e-06	1.20608e-05	7.70333e-06	9.75755e-06	0.137278	0.164733	#	Asporin	2.6537		2.4321	2.0501	72.6305		70.8633	67.2142	70.236	2.7621	0.47395
Biglycan	0.71533	0.80003	0.7436	0.98057	41.7022	44.4454	42.6474	49.5095	44.5761	3.48017	0.087781	0.086201	0.10715	0.090143	8.06973	7.93601	9.678	8.26892	8.48816	0.804932	0.080276	0.096307	0.097667	0.077948	7.43106	8.78467	8.89769	7.23115	8.08614	0.87687	9.55099e-07	1.81469e-06	9.19399e-07	1.33651e-06	0.521579	0.55226	#	Biglycan	3.5056	2.8272	3.8794	4.0921	77.8054	73.8712	79.5057	80.3617	77.886	2.87967	0.98986
Bone marrow proteoglycan (BMPg)									ND										ND										ND									Bone marrow proteoglycan (BMPg)	5.0501	6.8763	5.3817	7.5667	83.4713	87.3037	84.3302	88.3269	85.858	2.32492	4.9613
Chondroadherin	4.4674	4.4468	4.4986	4.8093	81.7098	81.6406	81.8136	82.7862	81.9875	0.537181	1.1417	1.0347	0.85022	0.81015	53.3081	50.8527	45.9524	44.756	48.7173	4.04032	0.5223	0.64683	0.66359	0.65043	34.3099	39.2773	39.889	39.4097	38.2215	2.62092	3.36205e-06	4.91376e-06	5.43658e-08	1.72158e-07	0.00477796	0.00661564	*	Chondroadherin		4.2006	6.2289	5.0425		80.7714	86.1666	83.4506	83.4629	2.69761	1.64311
Chondroadherin-like protein (CHADL)	3.2291	3.6778	4.4661	4.1047	76.3543	78.6224	81.7054	80.4102	79.2731	2.32034	0.52499	0.50462	0.4946	0.51874	34.4258	33.538	33.0925	34.1559	33.8031	0.602083	ND	0.37159	0.22938	0.23		27.0919	18.6582	18.6992	21.4831	4.85742	2.26436e-08	1.91403e-07	2.60149e-07	4.94283e-07	0.000850486	0.00153088	*	Chondroadherin-like protein (CHADL)									ND
Chondroitin Sulfate Proteoglycan 4 (CSPG4)	1.1627	1.5877	1.1425	1.6022	53.7615	61.3556	53.3256	61.571	57.5034	4.5768	0.1969	0.22975	0.40534	0.24091	16.4508	18.6827	28.8428	19.414	20.8476	5.47716	0.21304	0.23053	0.28262	0.13231	17.5625	18.7342	22.0346	11.685	17.5041	4.3168	4.96695e-05	5.89825e-05	1.45022e-05	1.67322e-05	0.374436	0.42124	#	Chondroitin Sulfate Proteoglycan 4 (CSPG4)			Heavy only	Heavy only					NQ
Decorin	2.5652	2.485	2.7196	2.8459	71.9511	71.3056	73.1154	73.9983	72.5926	1.19961	1.1487	1.0905	1.0507	1.0645	53.4602	52.1646	51.2362	51.5621	52.1058	0.98146	0.6459	0.59913	0.59789	0.65528	39.243	37.466	37.4175	39.5873	38.4284	1.14814	1.92747e-07	7.24947e-07	1.37162e-08	6.51521e-08	1.81297e-06	3.26334e-05	*	Decorin	5.3331	5.1923	5.8867	5.9417	78.0798	68.8211	59.4222	57.5984	65.9804	9.44693	2.3478
Extracellular matrix protein 2 (ECM2)	1.963	1.7858	1.9028	2.7057	66.2504	64.1037	65.5505	73.0145	67.2298	3.95875	0.33088	0.27153	0.29854	0.40806	24.8617	21.3546	22.9904	28.9803	24.5468	3.28469	0.1816	0.1669	0.10997	0.13859	15.369	14.3029	9.90747	12.1721	12.9378	2.41821	3.05393e-06	4.83539e-06	3.98144e-07	6.87703e-07	0.0012707	0.00190604	*	Extracellular matrix protein 2 (ECM2)									ND		Light only
Fibromodulin	0.81162	0.94261	0.92472	1.0479	44.8008	48.5229	48.0444	51.1695	48.1344	2.61303	0.090524	0.1217	0.10563	0.10971	8.30096	10.8496	9.55383	9.88637	9.64769	1.05262	0.10583	0.10736	0.14901	0.089163	9.57019	9.69513	12.9686	8.18638	10.1051	2.02773	1.59128e-07	7.24947e-07	4.43353e-07	7.01975e-07	0.701105	0.701105	#	Fibromodulin	0.92724			Heavy only	48.1123				NQ
Basement membrane-specific heparan sulfate proteoglycan core protein (HSPG)	0.69553	0.77916	0.72951	0.97473	41.0214	43.7937	42.1802	49.3602	44.0889	3.69352	0.082458	0.071969	0.1002	0.093696	7.61766	6.71372	9.10744	8.56691	8.00143	1.05649	0.061198	0.076286	0.073195	0.063813	5.76688	7.08789	6.82029	5.99852	6.41839	0.635221	1.47169e-06	2.54201e-06	9.84797e-07	1.33651e-06	0.0427113	0.0549145	#	Basement membrane-specific heparan sulfate proteoglycan core protein (HSPG)	2.1277	2.6173	3	4.9459	68.0276	72.3551	75	83.1817	74.6411	6.37794	0.98099
Hyaluronan and proteoglycan link protein 1(HPLp1)	1.1843	1.1648	1.1106	1.5728	54.2187	53.8064	52.6201	61.1318	55.4443	3.8518	0.13219	0.15505	0.11483	0.13425	11.6756	13.4237	10.3002	11.836	11.8089	1.27829	0.043712	0.050074	0.038027	0.030164	4.18813	4.76862	3.66339	2.92808	3.88705	0.782615	6.58094e-07	1.38931e-06	2.01937e-07	4.26312e-07	4.19612e-05	0.000125884	*	Hyaluronan and proteoglycan link protein 1(HPLp1)									ND
Hyaluronan and proteoglycan link protein 4 (HPLp4)	1.1958	1.1896	1.2708	1.6026	54.4585	54.3296	55.9627	61.5769	56.5819	3.41151	0.1309	0.14768	0.13096	0.13776	11.5749	12.8677	11.5795	12.108	12.0325	0.610428	0.050784	0.066269	0.046659	0.046567	4.83296	6.21504	4.4579	4.4495	4.98885	0.836787	2.28931e-07	7.24947e-07	1.03461e-07	2.45721e-07	9.98236e-06	4.35087e-05	*	Hyaluronan and proteoglycan link protein 4 (HPLp4)									ND
Keratocan	0.72192	0.78541	0.43468	0.58987	41.9253	43.9905	30.298	37.1018	38.3289	6.08243									ND										ND									Keratocan	3.962	4.3101	2.1819	2.5109	79.8468	81.168	68.5722	71.5173	75.2761	6.18267
Lubricin	4.6831	4.4611	5.0763	5.5499	82.404	81.6887	83.5426	84.7326	83.092	1.33383	1.6255	1.9137	1.9243	2.0067	61.912	65.6794	65.8038	66.7409	65.034	2.1346	0.89862	0.92782	0.81268	0.82646	47.3302	48.1279	44.8331	45.2493	46.3851	1.59473	7.16906e-06	9.72945e-06	3.44353e-08	1.30854e-07	8.31482e-06	4.35087e-05	*	Lubricin			Heavy only	Heavy only					NQ
Lumican	2.4842	2.6566	2.6883	2.969	71.299	72.6522	72.8872	74.8047	72.9108	1.44364	0.68283	0.77645	0.61411	0.69971	40.5763	43.708	38.0464	41.1664	40.8743	2.32386	0.46369	0.47451	0.42819	0.45635	31.6795	32.1809	29.9813	31.3352	31.2942	0.941632	3.96248e-07	1.07553e-06	5.25727e-09	4.9944e-08	0.000261568	0.000672603	*	Lumican	2.4582	2.0839	2.4913	2.6782	71.0832	67.5735	71.3574	72.8128	70.7067	2.22243	0.57897
Mimecan	0.80498	0.99095	0.82595	1.123	44.5977	49.7727	45.234	52.8968	48.1253	3.9279	0.41857	0.34843	0.33411	0.37092	29.5065	25.8397	25.0437	27.0563	26.8615	1.94786	0.18589	0.25679	0.15208	0.16023	15.6751	20.4322	13.2005	13.8102	15.7795	3.27558	6.91251e-05	7.72575e-05	1.49709e-05	1.67322e-05	0.00113594	0.00185881	*	Mimecan	1.9961	1.533	2.0206	2.0923	66.6233	60.5211	66.894	67.6616	65.425	3.2987	0.7846
Osteomodulin	2.2181	2.2428	2.4173	2.5892	68.9258	69.1625	70.7371	72.1386	70.241	1.49892	0.35497	0.29816	0.31047	0.36651	26.1976	22.9679	23.6915	26.8209	24.9195	1.87666	0.05802	0.093941	0.060652	0.085093	5.48383	8.58739	5.71837	7.842	6.9079	1.54231	2.31044e-08	1.91403e-07	1.61473e-09	3.068e-08	5.92126e-06	4.35087e-05	*	Osteomodulin	2.4257	2.0503	2.7559	4.0316	70.8089	67.2163	73.3752	80.1256	72.8815	5.4501
Prolargin	1.2407	1.1673	1.1848	1.0836	55.3711	53.8596	54.2292	52.0061	53.8665	1.39718	0.26742	0.26359	0.29714	0.29553	21.0996	20.8604	22.9073	22.8115	21.9197	1.09018	0.18079	0.19226	0.21921	0.19376	15.3109	16.1257	17.9797	16.2311	16.4118	1.12319	3.02215e-08	1.91403e-07	1.25024e-08	6.51521e-08	0.000412053	0.000826047	*	Prolargin		0.76711	1.7691	2.0284		43.4104	63.8872	66.9793	58.0923	12.8085	0.47661
Versican									ND		Light only	0.629	0.61164	0.83307		38.6126	37.9514	45.4467	40.6703	4.14972	0.22301	Light only	0.21431	0.18341	18.2345		17.6487	15.4984	17.1272	1.44066					1.20858e-05	4.35087e-05	^	Versican		Heavy only	2.6179				72.3597		NQ
[truncated: 64 more columns]
