# Supplementary material for: Age-dependent changes in protein incorporation into collagen-rich tissues of mice by in vivo pulsed SILAC labelling
Source: eLife. 2021 Sep 28;10:e66635. doi: 10.7554/eLife.66635 (PMC8478409; doi:10.7554/eLife.66635)
Supplement: Figure 7—source data 2. — STRING clusters with protein description. Proteins with statistically significant changes between groups C and D (unpaired Student's t-test BH corrected p>0.05) were clustered using STRING software. Networks were built with edges high confidence interaction score of 0.7 and clustered applying MCL algorithm with inflation parameter = 2. [file elife-66635-fig7-data2.xlsx]

## Sheet: cartilage
#clustering method	cluster number	cluster color	gene count	protein name	protein identifier	protein description
MCL	1	Red	23	App	10090.ENSMUSP00000005406	Amyloid-beta A4 protein; Functions as a cell surface receptor and performs physiological functions on the surface of neurons relevant to neurite growth, neuronal adhesion and axonogenesis. Involved in cell mobility and transcription regulation through protein-protein interactions. Can promote transcription activation through binding to APBB1-KAT5 and inhibit Notch signaling through interaction wi…
MCL	1	Red	23	C4b	10090.ENSMUSP00000069418	Complement C4-B; Non-enzymatic component of C3 and C5 convertases and thus essential for the propagation of the classical complement pathway. Covalently binds to immunoglobulins and immune complexes and enhances the solubilization of immune aggregates and the clearance of IC through CR1 on erythrocytes. Catalyzes the transacylation of the thioester carbonyl group to form ester bonds with carbohyd…
MCL	1	Red	23	Cd109	10090.ENSMUSP00000091330	CD109 antigen; Modulates negatively TGFB1 signaling in keratinocytes
MCL	1	Red	23	Cd55	10090.ENSMUSP00000027650	Complement decay-accelerating factor, GPI-anchored; This protein recognizes C4b and C3b fragments that condense with cell-surface hydroxyl or amino groups when nascent C4b and C3b are locally generated during C4 and c3 activation. Interaction of daf with cell-associated C4b and C3b polypeptides interferes with their ability to catalyze the conversion of C2 and factor B to enzymatically active C2a…
MCL	1	Red	23	Ckap4	10090.ENSMUSP00000050336	Cytoskeleton-associated protein 4; High-affinity epithelial cell surface receptor for APF
MCL	1	Red	23	Col11a1	10090.ENSMUSP00000089793	Collagen alpha-1(XI) chain; May play an important role in fibrillogenesis by controlling lateral growth of collagen II fibrils; Belongs to the fibrillar collagen family
MCL	1	Red	23	Col11a2	10090.ENSMUSP00000084772	Collagen alpha-2(XI) chain; May play an important role in fibrillogenesis by controlling lateral growth of collagen II fibrils; Belongs to the fibrillar collagen family
MCL	1	Red	23	Col14a1	10090.ENSMUSP00000105846	Collagen alpha-1(XIV) chain; Plays an adhesive role by integrating collagen bundles. It is probably associated with the surface of interstitial collagen fibrils via COL1. The COL2 domain may then serve as a rigid arm which sticks out from the fibril and protrudes the large N-terminal globular domain into the extracellular space, where it might interact with other matrix molecules or cell surface …
MCL	1	Red	23	Cp	10090.ENSMUSP00000088857	Ceruloplasmin; Ceruloplasmin is a blue, copper-binding (6-7 atoms per molecule) glycoprotein. It has ferroxidase activity oxidizing Fe(2+) to Fe(3+) without releasing radical oxygen species. It is involved in iron transport across the cell membrane. Provides Cu(2+) ions for the ascorbate-mediated deaminase degradation of the heparan sulfate chains of GPC1. May also play a role in fetal lung devel…
MCL	1	Red	23	Cpm	10090.ENSMUSP00000020399	Carboxypeptidase M; Specifically removes C-terminal basic residues (Arg or Lys) from peptides and proteins. It is believed to play important roles in the control of peptide hormone and growth factor activity at the cell surface, and in the membrane-localized degradation of extracellular proteins (By similarity)
MCL	1	Red	23	Cst3	10090.ENSMUSP00000028938	Cystatin-C; As an inhibitor of cysteine proteinases, this protein is thought to serve an important physiological role as a local regulator of this enzyme activity
MCL	1	Red	23	Gpld1	10090.ENSMUSP00000021773	Phosphatidylinositol-glycan-specific phospholipase D; This protein hydrolyzes the inositol phosphate linkage in proteins anchored by phosphatidylinositol glycans (GPI-anchor) thus releasing these proteins from the membrane
MCL	1	Red	23	Ibsp	10090.ENSMUSP00000031246	Bone sialoprotein 2; Binds tightly to hydroxyapatite. Appears to form an integral part of the mineralized matrix. Probably important to cell-matrix interaction. Promotes Arg-Gly-Asp-dependent cell attachment (By similarity)
MCL	1	Red	23	Lap3	10090.ENSMUSP00000040222	Cytosol aminopeptidase; Presumably involved in the processing and regular turnover of intracellular proteins. Catalyzes the removal of unsubstituted N-terminal amino acids from various peptides (By similarity)
MCL	1	Red	23	Mfge8	10090.ENSMUSP00000032825	Lactadherin; Contributes to phagocytic removal of apoptotic cells in many tissues. Specific ligand for the alpha-v/beta-3 and alpha- v/beta-5 receptors. Also binds to phosphatidylserine-enriched cell surfaces in a receptor-independent manner. Zona pellucida-binding protein which may play a role in gamete interaction (By similarity). Plays an important role in the maintenance of intestinal epithel…
MCL	1	Red	23	Mfi2	10090.ENSMUSP00000023464	Melanotransferrin; Involved in iron cellular uptake. Seems to be internalized and then recycled back to the cell membrane. Binds a single atom of iron per subunit. Could also bind zinc
MCL	1	Red	23	P4ha1	10090.ENSMUSP00000009789	Prolyl 4-hydroxylase subunit alpha-1; Catalyzes the post-translational formation of 4- hydroxyproline in -Xaa-Pro-Gly- sequences in collagens and other proteins
MCL	1	Red	23	P4hb	10090.ENSMUSP00000026122	Protein disulfide-isomerase; This multifunctional protein catalyzes the formation, breakage and rearrangement of disulfide bonds. At the cell surface, seems to act as a reductase that cleaves disulfide bonds of proteins attached to the cell. May therefore cause structural modifications of exofacial proteins. Inside the cell, seems to form/rearrange disulfide bonds of nascent proteins. At high con…
MCL	1	Red	23	Pcolce2	10090.ENSMUSP00000015498	Procollagen C-endopeptidase enhancer 2; Binds to the C-terminal propeptide of types I and II procollagens and may enhance the cleavage of that propeptide by BMP1
MCL	1	Red	23	Spp1	10090.ENSMUSP00000108367	Osteopontin; Binds tightly to hydroxyapatite. Appears to form an integral part of the mineralized matrix. Probably important to cell-matrix interaction; Belongs to the osteopontin family
MCL	1	Red	23	Tnc	10090.ENSMUSP00000102995	Tenascin; Extracellular matrix protein implicated in guidance of migrating neurons as well as axons during development, synaptic plasticity as well as neuronal regeneration. Promotes neurite outgrowth when provided to neurons in culture. May play a role in supporting the growth of epithelial tumors. Ligand for integrins ITGA8:ITGB1, ITGA9:ITGB1, ITGAV:ITGB3 and ITGAV:ITGB6. In tumors, stimulates …
MCL	1	Red	23	Tnfrsf11b	10090.ENSMUSP00000078705	Tumor necrosis factor receptor superfamily member 11B; Acts as decoy receptor for TNFSF11/RANKL and thereby neutralizes its function in osteoclastogenesis. Inhibits the activation of osteoclasts and promotes osteoclast apoptosis in vitro. Bone homeostasis seems to depend on the local ratio between TNFSF11 and TNFRSF11B. May also play a role in preventing arterial calcification. May act as decoy r…
MCL	1	Red	23	Vcan	10090.ENSMUSP00000105173	Versican core protein; May play a role in intercellular signaling and in connecting cells with the extracellular matrix. May take part in the regulation of cell motility, growth and differentiation. Binds hyaluronic acid
MCL	2	Brown	18	Eef1a2	10090.ENSMUSP00000054556	Elongation factor 1-alpha 2; This protein promotes the GTP-dependent binding of aminoacyl-tRNA to the A-site of ribosomes during protein biosynthesis
MCL	2	Brown	18	Gm10036	10090.ENSMUSP00000078670	Predicted gene 10036; Belongs to the universal ribosomal protein uL5 family
MCL	2	Brown	18	Psma2	10090.ENSMUSP00000129767	Proteasome subunit alpha type-2; Component of the 20S core proteasome complex involved in the proteolytic degradation of most intracellular proteins. This complex plays numerous essential roles within the cell by associating with different regulatory particles. Associated with two 19S regulatory particles, forms the 26S proteasome and thus participates in the ATP-dependent degradation of ubiquiti…
MCL	2	Brown	18	Psma5	10090.ENSMUSP00000088057	Proteasome subunit alpha type-5; Component of the 20S core proteasome complex involved in the proteolytic degradation of most intracellular proteins. This complex plays numerous essential roles within the cell by associating with different regulatory particles. Associated with two 19S regulatory particles, forms the 26S proteasome and thus participates in the ATP-dependent degradation of ubiquiti…
MCL	2	Brown	18	Rpl12	10090.ENSMUSP00000117461	60S ribosomal protein L12; Binds directly to 26S ribosomal RNA
MCL	2	Brown	18	Rpl13	10090.ENSMUSP00000000756	Ribosomal protein L13; Belongs to the eukaryotic ribosomal protein eL13 family
MCL	2	Brown	18	Rpl19	10090.ENSMUSP00000017548	Ribosomal protein L19
MCL	2	Brown	18	Rpl21	10090.ENSMUSP00000041652	60S ribosomal protein L21; Component of the large ribosomal subunit
MCL	2	Brown	18	Rpl23	10090.ENSMUSP00000099435	Ribosomal protein L23
MCL	2	Brown	18	Rpl24	10090.ENSMUSP00000023269	Ribosomal protein L24; Belongs to the eukaryotic ribosomal protein eL24 family
MCL	2	Brown	18	Rpl30	10090.ENSMUSP00000106014	Ribosomal protein L30; Belongs to the eukaryotic ribosomal protein eL30 family
MCL	2	Brown	18	Rpl36	10090.ENSMUSP00000079340	60S ribosomal protein L36; Component of the large ribosomal subunit
MCL	2	Brown	18	Rpl9	10090.ENSMUSP00000109399	Ribosomal protein L9; Belongs to the universal ribosomal protein uL6 family
MCL	2	Brown	18	Rps16	10090.ENSMUSP00000103940	Ribosomal protein S16; Belongs to the universal ribosomal protein uS9 family
MCL	2	Brown	18	Rps27a	10090.ENSMUSP00000099909	Ubiquitin-40S ribosomal protein S27a; Ubiquitin: Exists either covalently attached to another protein, or free (unanchored). When covalently bound, it is conjugated to target proteins via an isopeptide bond either as a monomer (monoubiquitin), a polymer linked via different Lys residues of the ubiquitin (polyubiquitin chains) or a linear polymer linked via the initiator Met of the ubiquitin (line…
MCL	2	Brown	18	Rps3a1	10090.ENSMUSP00000029722	40S ribosomal protein S3a; May play a role during erythropoiesis through regulation of transcription factor DDIT3
MCL	2	Brown	18	Rps5	10090.ENSMUSP00000004554	Ribosomal protein S5; Belongs to the universal ribosomal protein uS7 family
MCL	2	Brown	18	Rps6	10090.ENSMUSP00000099878	40S ribosomal protein S6; May play an important role in controlling cell growth and proliferation through the selective translation of particular classes of mRNA
MCL	3	Dark Golden Rod	18	Atp2a1	10090.ENSMUSP00000032974	Sarcoplasmic/endoplasmic reticulum calcium ATPase 1; Key regulator of striated muscle performance by acting as the major Ca(2+) ATPase responsible for the reuptake of cytosolic Ca(2+) into the sarcoplasmic reticulum. Catalyzes the hydrolysis of ATP coupled with the translocation of calcium from the cytosol to the sarcoplasmic reticulum lumen. Contributes to calcium sequestration involved in muscu…
MCL	3	Dark Golden Rod	18	Atp2a3	10090.ENSMUSP00000021142	Sarcoplasmic/endoplasmic reticulum calcium ATPase 3; This magnesium-dependent enzyme catalyzes the hydrolysis of ATP coupled with the transport of calcium. Transports calcium ions from the cytosol into the sarcoplasmic/endoplasmic reticulum lumen. Contributes to calcium sequestration involved in muscular excitation/contraction; Belongs to the cation transport ATPase (P-type) (TC 3.A.3) family. Ty…
MCL	3	Dark Golden Rod	18	Ckm	10090.ENSMUSP00000003643	Creatine kinase M-type; Reversibly catalyzes the transfer of phosphate between ATP and various phosphogens (e.g. creatine phosphate). Creatine kinase isoenzymes play a central role in energy transduction in tissues with large, fluctuating energy demands, such as skeletal muscle, heart, brain and spermatozoa; Belongs to the ATP:guanido phosphotransferase family
MCL	3	Dark Golden Rod	18	Ldb3	10090.ENSMUSP00000022327	LIM domain-binding protein 3; May function as an adapter in striated muscle to couple protein kinase C-mediated signaling via its LIM domains to the cytoskeleton
MCL	3	Dark Golden Rod	18	Mb	10090.ENSMUSP00000125995	Myoglobin; Serves as a reserve supply of oxygen and facilitates the movement of oxygen within muscles
MCL	3	Dark Golden Rod	18	Mybpc2	10090.ENSMUSP00000130127	Myosin-binding protein C, fast-type; Thick filament-associated protein located in the crossbridge region of vertebrate striated muscle a bands. In vitro it binds MHC, F-actin and native thin filaments, and modifies the activity of actin-activated myosin ATPase. It may modulate muscle contraction or may play a more structural role (By similarity)
MCL	3	Dark Golden Rod	18	Myh3	10090.ENSMUSP00000104329	Myosin-3; Muscle contraction
MCL	3	Dark Golden Rod	18	Myh4	10090.ENSMUSP00000018632	Myosin-4; Muscle contraction
MCL	3	Dark Golden Rod	18	Myh7	10090.ENSMUSP00000099867	Myosin-7; Myosins are actin-based motor molecules with ATPase activity essential for muscle contraction. Forms regular bipolar thick filaments that, together with actin thin filaments, constitute the fundamental contractile unit of skeletal and cardiac muscle; Belongs to the TRAFAC class myosin-kinesin ATPase superfamily. Myosin family
MCL	3	Dark Golden Rod	18	Myh8	10090.ENSMUSP00000019625	Myosin-8; Muscle contraction
MCL	3	Dark Golden Rod	18	Myl1	10090.ENSMUSP00000027151	Myosin light chain 1/3, skeletal muscle isoform; Regulatory light chain of myosin. Does not bind calcium
MCL	3	Dark Golden Rod	18	Mylpf	10090.ENSMUSP00000032910	Myosin light chain, phosphorylatable, fast skeletal muscle
MCL	3	Dark Golden Rod	18	Neb	10090.ENSMUSP00000047763	Nebulin
MCL	3	Dark Golden Rod	18	Ryr1	10090.ENSMUSP00000137123	Ryanodine receptor 1; Calcium channel that mediates the release of Ca(2+) from the sarcoplasmic reticulum into the cytoplasm and thereby plays a key role in triggering muscle contraction following depolarization of T-tubules. Repeated very high-level exercise increases the open probability of the channel and leads to Ca(2+) leaking into the cytoplasm. Can also mediate the release of Ca(2+) from i…
MCL	3	Dark Golden Rod	18	Tnnc2	10090.ENSMUSP00000099384	Troponin C, skeletal muscle; Troponin is the central regulatory protein of striated muscle contraction. Tn consists of three components: Tn-I which is the inhibitor of actomyosin ATPase, Tn-T which contains the binding site for tropomyosin and Tn-C. The binding of calcium to Tn-C abolishes the inhibitory action of Tn on actin filaments
MCL	3	Dark Golden Rod	18	Tnni2	10090.ENSMUSP00000122733	Troponin I, fast skeletal muscle; Troponin I is the inhibitory subunit of troponin, the thin filament regulatory complex which confers calcium-sensitivity to striated muscle actomyosin ATPase activity
MCL	3	Dark Golden Rod	18	Tpm3	10090.ENSMUSP00000113978	Tropomyosin alpha-3 chain; Tropomyosin 3, gamma; Belongs to the tropomyosin family
MCL	3	Dark Golden Rod	18	Ttn	10090.ENSMUSP00000097561	Titin; Key component in the assembly and functioning of vertebrate striated muscles. By providing connections at the level of individual microfilaments, it contributes to the fine balance of forces between the two halves of the sarcomere. The size and extensibility of the cross-links are the main determinants of sarcomere extensibility properties of muscle. In non-muscle cells, seems to play a ro…
MCL	4	Yellow	16	Aco2	10090.ENSMUSP00000023116	Aconitate hydratase, mitochondrial; Catalyzes the isomerization of citrate to isocitrate via cis-aconitate; Belongs to the aconitase/IPM isomerase family
MCL	4	Yellow	16	Aldoa	10090.ENSMUSP00000084846	Fructose-bisphosphate aldolase A; Plays a key role in glycolysis and gluconeogenesis. In addition, may also function as scaffolding protein (By similarity); Belongs to the class I fructose-bisphosphate aldolase family
MCL	4	Yellow	16	Clu	10090.ENSMUSP00000022616	Clusterin; Functions as extracellular chaperone that prevents aggregation of nonnative proteins. Prevents stress-induced aggregation of blood plasma proteins. Inhibits formation of amyloid fibrils by APP, APOC2, B2M, CALCA, CSN3, SNCA and aggregation-prone LYZ variants (in vitro). Does not require ATP. Maintains partially unfolded proteins in a state appropriate for subsequent refolding by other …
MCL	4	Yellow	16	Eno3	10090.ENSMUSP00000072620	Beta-enolase; Appears to have a function in striated muscle development and regeneration
MCL	4	Yellow	16	F13a1	10090.ENSMUSP00000048667	Coagulation factor XIII A chain; Factor XIII is activated by thrombin and calcium ion to a transglutaminase that catalyzes the formation of gamma-glutamyl- epsilon-lysine cross-links between fibrin chains, thus stabilizing the fibrin clot. Also cross-link alpha-2-plasmin inhibitor, or fibronectin, to the alpha chains of fibrin
MCL	4	Yellow	16	Fgb	10090.ENSMUSP00000039472	Fibrinogen beta chain; Cleaved by the protease thrombin to yield monomers which, together with fibrinogen alpha (FGA) and fibrinogen gamma (FGG), polymerize to form an insoluble fibrin matrix. Fibrin has a major function in hemostasis as one of the primary components of blood clots. In addition, functions during the early stages of wound repair to stabilize the lesion and guide cell migration dur…
MCL	4	Yellow	16	Fh1	10090.ENSMUSP00000027810	Fumarate hydratase, mitochondrial; Fumarate hydratase 1
MCL	4	Yellow	16	Fth1	10090.ENSMUSP00000025563	Ferritin heavy chain; Stores iron in a soluble, non-toxic, readily available form. Important for iron homeostasis. Has ferroxidase activity. Iron is taken up in the ferrous form and deposited as ferric hydroxides after oxidation. Also plays a role in delivery of iron to cells. Mediates iron uptake in capsule cells of the developing kidney
MCL	4	Yellow	16	Gpi1	10090.ENSMUSP00000049355	Glucose-6-phosphate isomerase; Besides it's role as a glycolytic enzyme, mammalian GPI can function as a tumor-secreted cytokine and an angiogenic factor (AMF) that stimulates endothelial cell motility. GPI is also a neurotrophic factor (Neuroleukin) for spinal and sensory neurons
MCL	4	Yellow	16	Hk1	10090.ENSMUSP00000097282	Hexokinase-1; Hexokinase 1; Belongs to the hexokinase family
MCL	4	Yellow	16	Ldha	10090.ENSMUSP00000103267	Lactate dehydrogenase A; Belongs to the LDH/MDH superfamily. LDH family
MCL	4	Yellow	16	Pgam2	10090.ENSMUSP00000020768	Phosphoglycerate mutase 2; Interconversion of 3- and 2-phosphoglycerate with 2,3- bisphosphoglycerate as the primer of the reaction. Can also catalyze the reaction of EC 5.4.2.4 (synthase), but with a reduced activity
MCL	4	Yellow	16	Pgd	10090.ENSMUSP00000081141	6-phosphogluconate dehydrogenase, decarboxylating; Catalyzes the oxidative decarboxylation of 6- phosphogluconate to ribulose 5-phosphate and CO(2), with concomitant reduction of NADP to NADPH
MCL	4	Yellow	16	Taldo1	10090.ENSMUSP00000026576	Transaldolase; Transaldolase is important for the balance of metabolites in the pentose-phosphate pathway
MCL	4	Yellow	16	Thbs1	10090.ENSMUSP00000044903	Thrombospondin-1; Adhesive glycoprotein that mediates cell-to-cell and cell-to-matrix interactions. Binds heparin. May play a role in dentinogenesis and/or maintenance of dentin and dental pulp. Ligand for CD36 mediating antiangiogenic properties (By similarity). Plays a role in ER stress response, via its interaction with the activating transcription factor 6 alpha (ATF6) which produces adaptive…
MCL	4	Yellow	16	Tpi1	10090.ENSMUSP00000130858	Triosephosphate isomerase 1; Belongs to the triosephosphate isomerase family
MCL	5	Olive	12	Calr	10090.ENSMUSP00000003912	Calreticulin; Calcium-binding chaperone that promotes folding, oligomeric assembly and quality control in the endoplasmic reticulum (ER) via the calreticulin/calnexin cycle. This lectin interacts transiently with almost all of the monoglucosylated glycoproteins that are synthesized in the ER. Interacts with the DNA-binding domain of NR3C1 and mediates its nuclear export. Involved in maternal gene…
MCL	5	Olive	12	Hsp90ab1	10090.ENSMUSP00000024739	Heat shock protein HSP 90-beta; Molecular chaperone that promotes the maturation, structural maintenance and proper regulation of specific target proteins involved for instance in cell cycle control and signal transduction. Undergoes a functional cycle that is linked to its ATPase activity. This cycle probably induces conformational changes in the client proteins, thereby causing their activation…
MCL	5	Olive	12	Hspa1a	10090.ENSMUSP00000084586	Heat shock 70 kDa protein 1A; Molecular chaperone implicated in a wide variety of cellular processes, including protection of the proteome from stress, folding and transport of newly synthesized polypeptides, activation of proteolysis of misfolded proteins and the formation and dissociation of protein complexes. Plays a pivotal role in the protein quality control system, ensuring the correct fold…
MCL	5	Olive	12	Hspa5	10090.ENSMUSP00000097747	78 kDa glucose-regulated protein; Plays a role in facilitating the assembly of multimeric protein complexes inside the endoplasmic reticulum. Involved in the correct folding of proteins and degradation of misfolded proteins via its interaction with DNAJC10, probably to facilitate the release of DNAJC10 from its substrate; Belongs to the heat shock protein 70 family
MCL	5	Olive	12	Hspa9	10090.ENSMUSP00000025217	Stress-70 protein, mitochondrial; Chaperone protein which plays an important role in mitochondrial iron-sulfur cluster (ISC) biogenesis. Interacts with and stabilizes ISC cluster assembly proteins FXN, NFU1, NFS1 and ISCU (By similarity). Regulates erythropoiesis via stabilization of ISC assembly. May play a role in the control of cell proliferation and cellular aging; Belongs to the heat shock p…
MCL	5	Olive	12	Hyou1	10090.ENSMUSP00000068594	Hypoxia up-regulated protein 1; Has a pivotal role in cytoprotective cellular mechanisms triggered by oxygen deprivation. May play a role as a molecular chaperone and participate in protein folding (By similarity)
MCL	5	Olive	12	Lrp1	10090.ENSMUSP00000044004	Prolow-density lipoprotein receptor-related protein 1; Endocytic receptor involved in endocytosis and in phagocytosis of apoptotic cells. Required for early embryonic development. Involved in cellular lipid homeostasis. Involved in the plasma clearance of chylomicron remnants and activated LRPAP1 (alpha 2-macroglobulin), as well as the local metabolism of complexes between plasminogen activators …
MCL	5	Olive	12	Pdia3	10090.ENSMUSP00000028683	Protein disulfide-isomerase A3; Protein disulfide isomerase associated 3
MCL	5	Olive	12	Ppib	10090.ENSMUSP00000034947	Peptidyl-prolyl cis-trans isomerase B; PPIases accelerate the folding of proteins. It catalyzes the cis-trans isomerization of proline imidic peptide bonds in oligopeptides
MCL	5	Olive	12	Rpn2	10090.ENSMUSP00000112081	Dolichyl-diphosphooligosaccharide--protein glycosyltransferase subunit 2; Essential subunit of the N-oligosaccharyl transferase (OST) complex which catalyzes the transfer of a high mannose oligosaccharide from a lipid-linked oligosaccharide donor to an asparagine residue within an Asn-X-Ser/Thr consensus motif in nascent polypeptide chains; Belongs to the SWP1 family
MCL	5	Olive	12	S100a1	10090.ENSMUSP00000058237	Protein S100-A1; Probably acts as a Ca(2+) signal transducer. In response to an increase in intracellular Ca(2+) levels, binds calcium which triggers a conformational change. This conformational change allows interaction of S1001A with specific target proteins, such as TPR-containing proteins, and the modulation of their activity
MCL	5	Olive	12	Uggt1	10090.ENSMUSP00000037930	UDP-glucose:glycoprotein glucosyltransferase 1; Recognizes glycoproteins with minor folding defects. Reglucosylates single N-glycans near the misfolded part of the protein, thus providing quality control for protein folding in the endoplasmic reticulum. Reglucosylated proteins are recognized by calreticulin for recycling to the endoplasmic reticulum and refolding or degradation (By similarity); B…
MCL	6	Green	8	Acan	10090.ENSMUSP00000032835	Aggrecan core protein; This proteoglycan is a major component of extracellular matrix of cartilagenous tissues. A major function of this protein is to resist compression in cartilage. It binds avidly to hyaluronic acid via an N-terminal globular region. May play a regulatory role in the matrix assembly of the cartilage
MCL	6	Green	8	Cd36	10090.ENSMUSP00000131832	Platelet glycoprotein 4; Multifunctional glycoprotein that acts as receptor for a broad range of ligands. Ligands can be of proteinaceous nature like thrombospondin, fibronectin, collagen or amyloid-beta as well as of lipidic nature such as oxidized low-density lipoprotein (oxLDL), anionic phospholipids, long-chain fatty acids and bacterial diacylated lipopeptides. They are generally multivalent …
MCL	6	Green	8	Comp	10090.ENSMUSP00000003659	Cartilage oligomeric matrix protein; May play a role in the structural integrity of cartilage via its interaction with other extracellular matrix proteins such as the collagens and fibronectin. Can mediate the interaction of chondrocytes with the cartilage extracellular matrix through interaction with cell surface integrin receptors. Could play a role in the pathogenesis of osteoarthritis. Potent…
MCL	6	Green	8	Ctgf	10090.ENSMUSP00000020171	Connective tissue growth factor; Major connective tissue mitoattractant secreted by vascular endothelial cells. Promotes proliferation and differentiation of chondrocytes (By similarity). Mediates heparin- and divalent cation-dependent cell adhesion in many cell types including fibroblasts, myofibroblasts, endothelial and epithelial cells (By similarity). Enhances fibroblast growth factor-induced…
MCL	6	Green	8	Dcn	10090.ENSMUSP00000100924	Decorin; May affect the rate of fibrils formation; Belongs to the small leucine-rich proteoglycan (SLRP) family. SLRP class I subfamily
MCL	6	Green	8	Fgf2	10090.ENSMUSP00000037694	Fibroblast growth factor 2; Plays an important role in the regulation of cell survival, cell division, angiogenesis, cell differentiation and cell migration. Functions as potent mitogen in vitro. Can induce angiogenesis; Belongs to the heparin-binding growth factors family
MCL	6	Green	8	Prg4	10090.ENSMUSP00000128943	Proteoglycan 4; Plays a role in boundary lubrication within articulating joints. Prevents protein deposition onto cartilage from synovial fluid by controlling adhesion-dependent synovial growth and inhibiting the adhesion of synovial cells to the cartilage surface
MCL	6	Green	8	Tgm2	10090.ENSMUSP00000099411	Protein-glutamine gamma-glutamyltransferase 2; Catalyzes the cross-linking of proteins and the conjugation of polyamines to proteins; Belongs to the transglutaminase superfamily. Transglutaminase family
MCL	7	Green 2	5	H1f0	10090.ENSMUSP00000137309	Histone H1.0; Histones H1 are necessary for the condensation of nucleosome chains into higher-order structures. The H1F0 histones are found in cells that are in terminal stages of differentiation or that have low rates of cell division
MCL	7	Green 2	5	Hist1h1b	10090.ENSMUSP00000079356	Histone H1.5; Histone H1 protein binds to linker DNA between nucleosomes forming the macromolecular structure known as the chromatin fiber. Histones H1 are necessary for the condensation of nucleosome chains into higher-order structured fibers. Acts also as a regulator of individual gene transcription through chromatin remodeling, nucleosome spacing and DNA methylation (By similarity)
MCL	7	Green 2	5	Hist1h1c	10090.ENSMUSP00000045816	Histone H1.2; Histone H1 protein binds to linker DNA between nucleosomes forming the macromolecular structure known as the chromatin fiber. Histones H1 are necessary for the condensation of nucleosome chains into higher-order structured fibers. Acts also as a regulator of individual gene transcription through chromatin remodeling, nucleosome spacing and DNA methylation (By similarity)
MCL	7	Green 2	5	Hist1h1e	10090.ENSMUSP00000057308	Histone H1.4; Histone H1 protein binds to linker DNA between nucleosomes forming the macromolecular structure known as the chromatin fiber. Histones H1 are necessary for the condensation of nucleosome chains into higher-order structured fibers. Acts also as a regulator of individual gene transcription through chromatin remodeling, nucleosome spacing and DNA methylation
MCL	7	Green 2	5	Hmgb1	10090.ENSMUSP00000082682	High mobility group protein B1; Multifunctional redox sensitive protein with various roles in different cellular compartments. In the nucleus is one of the major chromatin-associated non-histone proteins and acts as a DNA chaperone involved in replication, transcription, chromatin remodeling, V(D)J recombination, DNA repair and genome stability. Proposed to be an universal biosensor for nucleic a…
MCL	8	Light Green	5	Ecm2	10090.ENSMUSP00000060402	Extracellular matrix protein 2; Promotes matrix assembly and cell adhesiveness; Belongs to the small leucine-rich proteoglycan (SLRP) family. SLRP class I subfamily
MCL	8	Light Green	5	Lum	10090.ENSMUSP00000040877	Lumican; Belongs to the small leucine-rich proteoglycan (SLRP) family. SLRP class II subfamily
MCL	8	Light Green	5	Ogn	10090.ENSMUSP00000021822	Mimecan; Induces bone formation in conjunction with TGF-beta-1 or TGF-beta-2
MCL	8	Light Green	5	Omd	10090.ENSMUSP00000065706	Osteomodulin; May be implicated in biomineralization processes. Has a function in binding of osteoblasts via the alpha(V)beta(3)- integrin (By similarity)
MCL	8	Light Green	5	Prelp	10090.ENSMUSP00000048803	Prolargin; May anchor basement membranes to the underlying connective tissue
MCL	9	Medium Sea Green	4	Cct8	10090.ENSMUSP00000026704	T-complex protein 1 subunit theta; Molecular chaperone; assists the folding of proteins upon ATP hydrolysis. As part of the BBS/CCT complex may play a role in the assembly of BBSome, a complex involved in ciliogenesis regulating transports vesicles to the cilia. Known to play a role, in vitro, in the folding of actin and tubulin (By similarity)
MCL	9	Medium Sea Green	4	Kpnb1	10090.ENSMUSP00000001479	Importin subunit beta-1; Functions in nuclear protein import, either in association with an adapter protein, like an importin-alpha subunit, which binds to nuclear localization signals (NLS) in cargo substrates, or by acting as autonomous nuclear transport receptor. Acting autonomously, serves itself as NLS receptor. Docking of the importin/substrate complex to the nuclear pore complex (NPC) is m…
MCL	9	Medium Sea Green	4	Vat1	10090.ENSMUSP00000048350	Synaptic vesicle membrane protein VAT-1 homolog; Plays a part in calcium-regulated keratinocyte activation in epidermal repair mechanisms. Has no effect on cell proliferation (By similarity). Possesses ATPase activity. Negatively regulates mitochondrial fusion in cooperation with mitofusin proteins (MFN1-2) (By similarity)
MCL	9	Medium Sea Green	4	Vcp	10090.ENSMUSP00000030164	Transitional endoplasmic reticulum ATPase; Necessary for the fragmentation of Golgi stacks during mitosis and for their reassembly after mitosis. Involved in the formation of the transitional endoplasmic reticulum (tER). The transfer of membranes from the endoplasmic reticulum to the Golgi apparatus occurs via 50-70 nm transition vesicles which derive from part-rough, part-smooth transitional ele…
MCL	10	Cyan	4	Ap2m1	10090.ENSMUSP00000007216	AP-2 complex subunit mu; Component of the adaptor protein complex 2 (AP-2). Adaptor protein complexes function in protein transport via transport vesicles in different membrane traffic pathways. Adaptor protein complexes are vesicle coat components and appear to be involved in cargo selection and vesicle formation. AP-2 is involved in clathrin-dependent endocytosis in which cargo proteins are inc…
MCL	10	Cyan	4	Arpc4	10090.ENSMUSP00000114839	Actin-related protein 2/3 complex subunit 4; Functions as actin-binding component of the Arp2/3 complex which is involved in regulation of actin polymerization and together with an activating nucleation-promoting factor (NPF) mediates the formation of branched actin networks. Seems to contact the mother actin filament (By similarity)
MCL	10	Cyan	4	ENSMUSG00000045414	10090.ENSMUSP00000108651	Deleted in autism protein 1 homolog; May play a role in cardiomyocyte proliferation through paracrine signaling and activation of the PI3-kinase signaling cascade; Belongs to the DIA1 family
MCL	10	Cyan	4	Sec13	10090.ENSMUSP00000032440	Protein SEC13 homolog; Functions as a component of the nuclear pore complex (NPC) and the COPII coat. At the endoplasmic reticulum, SEC13 is involved in the biogenesis of COPII-coated vesicles; Belongs to the WD repeat SEC13 family
MCL	11	Medium Purple	3	Prdx1	10090.ENSMUSP00000114159	Peroxiredoxin-1; Thiol-specific peroxidase that catalyzes the reduction of hydrogen peroxide and organic hydroperoxides to water and alcohols, respectively. Plays a role in cell protection against oxidative stress by detoxifying peroxides and as sensor of hydrogen peroxide-mediated signaling events. Might participate in the signaling cascades of growth factors and tumor necrosis factor-alpha by r…
MCL	11	Medium Purple	3	Prdx3	10090.ENSMUSP00000025961	Thioredoxin-dependent peroxide reductase, mitochondrial; Thiol-specific peroxidase that catalyzes the reduction of hydrogen peroxide and organic hydroperoxides to water and alcohols, respectively. Plays a role in cell protection against oxidative stress by detoxifying peroxides
MCL	11	Medium Purple	3	Sod1	10090.ENSMUSP00000023707	Superoxide dismutase [Cu-Zn]; Destroys radicals which are normally produced within the cells and which are toxic to biological systems; Belongs to the Cu-Zn superoxide dismutase family
MCL	12	Orchid	3	Atp5f1	10090.ENSMUSP00000113022	ATP synthase F(0) complex subunit B1, mitochondrial; Mitochondrial membrane ATP synthase (F(1)F(0) ATP synthase or Complex V) produces ATP from ADP in the presence of a proton gradient across the membrane which is generated by electron transport complexes of the respiratory chain. F-type ATPases consist of two structural domains, F(1) - containing the extramembraneous catalytic core, and F(0) - c…
MCL	12	Orchid	3	Ndufa8	10090.ENSMUSP00000065352	NADH dehydrogenase [ubiquinone] 1 alpha subcomplex subunit 8; Accessory subunit of the mitochondrial membrane respiratory chain NADH dehydrogenase (Complex I), that is believed not to be involved in catalysis. Complex I functions in the transfer of electrons from NADH to the respiratory chain. The immediate electron acceptor for the enzyme is believed to be ubiquinone
MCL	12	Orchid	3	Ndufa9	10090.ENSMUSP00000085523	NADH dehydrogenase [ubiquinone] 1 alpha subcomplex subunit 9, mitochondrial; Accessory subunit of the mitochondrial membrane respiratory chain NADH dehydrogenase (Complex I), that is believed not to be involved in catalysis. Complex I functions in the transfer of electrons from NADH to the respiratory chain. The immediate electron acceptor for the enzyme is believed to be ubiquinone
MCL	13	Purple	3	Hnrnpd	10090.ENSMUSP00000132735	Heterogeneous nuclear ribonucleoprotein D0; Binds with high affinity to RNA molecules that contain AU-rich elements (AREs) found within the 3'-UTR of many proto- oncogenes and cytokine mRNAs. Also binds to double- and single- stranded DNA sequences in a specific manner and functions a transcription factor. Each of the RNA-binding domains specifically can bind solely to a single-stranded non-monot…
MCL	13	Purple	3	Hnrnph1	10090.ENSMUSP00000076989	Heterogeneous nuclear ribonucleoprotein H; This protein is a component of the heterogeneous nuclear ribonucleoprotein (hnRNP) complexes which provide the substrate for the processing events that pre-mRNAs undergo before becoming functional, translatable mRNAs in the cytoplasm. Mediates pre-mRNA alternative splicing regulation. Inhibits, together with CUGBP1, insulin receptor (IR) pre-mRNA exon 11…
MCL	13	Purple	3	Tnpo1	10090.ENSMUSP00000105028	Transportin-1; Functions in nuclear protein import as nuclear transport receptor. Serves as receptor for nuclear localization signals (NLS) in cargo substrates. Is thought to mediate docking of the importin/substrate complex to the nuclear pore complex (NPC) through binding to nucleoporin and the complex is subsequently translocated through the pore by an energy requiring, Ran-dependent mechanism…
MCL	14	Hot Pink	2	Serpine2	10090.ENSMUSP00000027467	Glia-derived nexin; Serine protease inhibitor with activity toward thrombin, trypsin, and urokinase. Promotes neurite extension by inhibiting thrombin. Binds heparin
MCL	14	Hot Pink	2	Vtn	10090.ENSMUSP00000017488	Vitronectin; Vitronectin is a cell adhesion and spreading factor found in serum and tissues. Vitronectin interact with glycosaminoglycans and proteoglycans. Is recognized by certain members of the integrin family and serves as a cell-to-substrate adhesion molecule. Inhibitor of the membrane-damaging effect of the terminal cytolytic complement pathway
MCL	15	Pink	2	Enpp1	10090.ENSMUSP00000101159	Ectonucleotide pyrophosphatase/phosphodiesterase family member 1; Appears to modulate insulin sensitivity (By similarity). By generating PPi, plays a role in regulating pyrophosphate levels, and functions in bone mineralization and soft tissue calcification. PPi inhibits mineralization by binding to nascent hydroxyapatite (HA) crystals, thereby preventing further growth of these crystals. Prefere…
MCL	15	Pink	2	Nampt	10090.ENSMUSP00000020886	Nicotinamide phosphoribosyltransferase; The secreted form behaves both as a cytokine with immunomodulating properties and an adipokine with anti-diabetic properties, it has no enzymatic activity, partly because of lack of activation by ATP, which has a low level in extracellular space and plasma (By similarity). Catalyzes the condensation of nicotinamide with 5-phosphoribosyl-1-pyrophosphate to y…

## Sheet: bone
#clustering method	cluster number	cluster color	gene count	protein name	protein identifier	protein description
MCL	1	Red	31	Acta1	10090.ENSMUSP00000034453	Actin, alpha skeletal muscle; Actins are highly conserved proteins that are involved in various types of cell motility and are ubiquitously expressed in all eukaryotic cells; Belongs to the actin family
MCL	1	Red	31	Actn3	10090.ENSMUSP00000006626	Alpha-actinin-3; F-actin cross-linking protein which is thought to anchor actin to a variety of intracellular structures. This is a bundling protein (By similarity)
MCL	1	Red	31	Atp2a1	10090.ENSMUSP00000032974	Sarcoplasmic/endoplasmic reticulum calcium ATPase 1; Key regulator of striated muscle performance by acting as the major Ca(2+) ATPase responsible for the reuptake of cytosolic Ca(2+) into the sarcoplasmic reticulum. Catalyzes the hydrolysis of ATP coupled with the translocation of calcium from the cytosol to the sarcoplasmic reticulum lumen. Contributes to calcium sequestration involved in muscu…
MCL	1	Red	31	Atp2a3	10090.ENSMUSP00000021142	Sarcoplasmic/endoplasmic reticulum calcium ATPase 3; This magnesium-dependent enzyme catalyzes the hydrolysis of ATP coupled with the transport of calcium. Transports calcium ions from the cytosol into the sarcoplasmic/endoplasmic reticulum lumen. Contributes to calcium sequestration involved in muscular excitation/contraction; Belongs to the cation transport ATPase (P-type) (TC 3.A.3) family. Ty…
MCL	1	Red	31	Casq1	10090.ENSMUSP00000003554	Calsequestrin-1; Calsequestrin is a high-capacity, moderate affinity, calcium-binding protein and thus acts as an internal calcium store in muscle. Calcium ions are bound by clusters of acidic residues at the protein surface, often at the interface between subunits. Can bind around 80 Ca(2+) ions (By similarity). Regulates the release of lumenal Ca(2+) via the calcium release channel RYR1; this p…
MCL	1	Red	31	Ckb	10090.ENSMUSP00000001304	Creatine kinase B-type; Reversibly catalyzes the transfer of phosphate between ATP and various phosphogens (e.g. creatine phosphate). Creatine kinase isoenzymes play a central role in energy transduction in tissues with large, fluctuating energy demands, such as skeletal muscle, heart, brain and spermatozoa; Belongs to the ATP:guanido phosphotransferase family
MCL	1	Red	31	Ckm	10090.ENSMUSP00000003643	Creatine kinase M-type; Reversibly catalyzes the transfer of phosphate between ATP and various phosphogens (e.g. creatine phosphate). Creatine kinase isoenzymes play a central role in energy transduction in tissues with large, fluctuating energy demands, such as skeletal muscle, heart, brain and spermatozoa; Belongs to the ATP:guanido phosphotransferase family
MCL	1	Red	31	Ldb3	10090.ENSMUSP00000022327	LIM domain-binding protein 3; May function as an adapter in striated muscle to couple protein kinase C-mediated signaling via its LIM domains to the cytoskeleton
MCL	1	Red	31	Mb	10090.ENSMUSP00000125995	Myoglobin; Serves as a reserve supply of oxygen and facilitates the movement of oxygen within muscles
MCL	1	Red	31	Mybpc1	10090.ENSMUSP00000112615	RIKEN cDNA 8030451F13, isoform CRA_d; Myosin binding protein C, slow-type
MCL	1	Red	31	Myh1	10090.ENSMUSP00000117569	Myosin-1; Muscle contraction
MCL	1	Red	31	Myh10	10090.ENSMUSP00000099671	Myosin-10; Involved with LARP6 in the stabilization of type I collagen mRNAs for CO1A1 and CO1A2. During cell spreading, plays an important role in cytoskeleton reorganization, focal contacts formation (in the central part but not the margins of spreading cells), and lamellipodial extension; this function is mechanically antagonized by MYH9 (By similarity). Cellular myosin that appears to play a …
MCL	1	Red	31	Myh3	10090.ENSMUSP00000104329	Myosin-3; Muscle contraction
MCL	1	Red	31	Myh4	10090.ENSMUSP00000018632	Myosin-4; Muscle contraction
MCL	1	Red	31	Myh7	10090.ENSMUSP00000099867	Myosin-7; Myosins are actin-based motor molecules with ATPase activity essential for muscle contraction. Forms regular bipolar thick filaments that, together with actin thin filaments, constitute the fundamental contractile unit of skeletal and cardiac muscle; Belongs to the TRAFAC class myosin-kinesin ATPase superfamily. Myosin family
MCL	1	Red	31	Myh8	10090.ENSMUSP00000019625	Myosin-8; Muscle contraction
MCL	1	Red	31	Myh9	10090.ENSMUSP00000016771	Myosin-9; During cell spreading, plays an important role in cytoskeleton reorganization, focal contacts formation (in the margins but not the central part of spreading cells), and lamellipodial retraction; this function is mechanically antagonized by MYH10 (By similarity). Cellular myosin that appears to play a role in cytokinesis, cell shape, and specialized functions such as secretion and cappi…
MCL	1	Red	31	Myl1	10090.ENSMUSP00000027151	Myosin light chain 1/3, skeletal muscle isoform; Regulatory light chain of myosin. Does not bind calcium
MCL	1	Red	31	Mylpf	10090.ENSMUSP00000032910	Myosin light chain, phosphorylatable, fast skeletal muscle
MCL	1	Red	31	Myom1	10090.ENSMUSP00000072945	Myomesin-1; May link the intermediate filament cytoskeleton to the M-disk of the myofibrils in striated muscle. May also contact myosin filaments. Also binds beta-integrins
MCL	1	Red	31	Myom2	10090.ENSMUSP00000033842	Myomesin 2
MCL	1	Red	31	Myoz1	10090.ENSMUSP00000087955	Myozenin-1; Myozenins may serve as intracellular binding proteins involved in linking Z-disk proteins such as alpha-actinin, gamma- filamin, TCAP/telethonin, LDB3/ZASP and localizing calcineurin signaling to the sarcomere. Plays an important role in the modulation of calcineurin signaling. May play a role in myofibrillogenesis
MCL	1	Red	31	Neb	10090.ENSMUSP00000047763	Nebulin
MCL	1	Red	31	Obscn	10090.ENSMUSP00000038264	Obscurin; Structural component of striated muscles which plays a role in myofibrillogenesis. Probably involved in the assembly of myosin into sarcomeric A bands in striated muscle (By similarity). Has serine/threonine protein kinase activity and phosphorylates N- cadherin CDH2 and sodium/potassium-transporting ATPase subunit ATP1B1
MCL	1	Red	31	Srl	10090.ENSMUSP00000023161	Sarcalumenin; May be involved in the regulation of calcium transport
MCL	1	Red	31	Tnnc2	10090.ENSMUSP00000099384	Troponin C, skeletal muscle; Troponin is the central regulatory protein of striated muscle contraction. Tn consists of three components: Tn-I which is the inhibitor of actomyosin ATPase, Tn-T which contains the binding site for tropomyosin and Tn-C. The binding of calcium to Tn-C abolishes the inhibitory action of Tn on actin filaments
MCL	1	Red	31	Tnni2	10090.ENSMUSP00000122733	Troponin I, fast skeletal muscle; Troponin I is the inhibitory subunit of troponin, the thin filament regulatory complex which confers calcium-sensitivity to striated muscle actomyosin ATPase activity
MCL	1	Red	31	Tnnt3	10090.ENSMUSP00000136278	Troponin T, fast skeletal muscle; Troponin T is the tropomyosin-binding subunit of troponin, the thin filament regulatory complex which confers calcium-sensitivity to striated muscle actomyosin ATPase activity
MCL	1	Red	31	Tpm1	10090.ENSMUSP00000109337	Tropomyosin alpha-1 chain; Binds to actin filaments in muscle and non-muscle cells. Plays a central role, in association with the troponin complex, in the calcium dependent regulation of vertebrate striated muscle contraction. Smooth muscle contraction is regulated by interaction with caldesmon. In non-muscle cells is implicated in stabilizing cytoskeleton actin filaments
MCL	1	Red	31	Ttn	10090.ENSMUSP00000097561	Titin; Key component in the assembly and functioning of vertebrate striated muscles. By providing connections at the level of individual microfilaments, it contributes to the fine balance of forces between the two halves of the sarcomere. The size and extensibility of the cross-links are the main determinants of sarcomere extensibility properties of muscle. In non-muscle cells, seems to play a ro…
MCL	1	Red	31	Vim	10090.ENSMUSP00000028062	Vimentin; Vimentins are class-III intermediate filaments found in various non-epithelial cells, especially mesenchymal cells. Vimentin is attached to the nucleus, endoplasmic reticulum, and mitochondria, either laterally or terminally
MCL	2	Salmon	29	Atp5a1	10090.ENSMUSP00000026495	ATP synthase subunit alpha, mitochondrial; Mitochondrial membrane ATP synthase (F(1)F(0) ATP synthase or Complex V) produces ATP from ADP in the presence of a proton gradient across the membrane which is generated by electron transport complexes of the respiratory chain. F-type ATPases consist of two structural domains, F(1) - containing the extramembraneous catalytic core, and F(0) - containing …
MCL	2	Salmon	29	Atp5b	10090.ENSMUSP00000026459	ATP synthase subunit beta, mitochondrial; Mitochondrial membrane ATP synthase (F(1)F(0) ATP synthase or Complex V) produces ATP from ADP in the presence of a proton gradient across the membrane which is generated by electron transport complexes of the respiratory chain. F-type ATPases consist of two structural domains, F(1) - containing the extramembraneous catalytic core, and F(0) - containing t…
MCL	2	Salmon	29	Atp5k	10090.ENSMUSP00000051222	ATP synthase subunit e, mitochondrial; Mitochondrial membrane ATP synthase (F(1)F(0) ATP synthase or Complex V) produces ATP from ADP in the presence of a proton gradient across the membrane which is generated by electron transport complexes of the respiratory chain. F-type ATPases consist of two structural domains, F(1) - containing the extramembraneous catalytic core, and F(0) - containing the …
MCL	2	Salmon	29	Cox4i1	10090.ENSMUSP00000034276	Cytochrome c oxidase subunit 4 isoform 1, mitochondrial; This protein is one of the nuclear-coded polypeptide chains of cytochrome c oxidase, the terminal oxidase in mitochondrial electron transport
MCL	2	Salmon	29	Cox5a	10090.ENSMUSP00000000090	Cytochrome c oxidase subunit 5A, mitochondrial; This is the heme A-containing chain of cytochrome c oxidase, the terminal oxidase in mitochondrial electron transport
MCL	2	Salmon	29	Cox6b1	10090.ENSMUSP00000075150	Cytochrome c oxidase subunit 6B1; Connects the two COX monomers into the physiological dimeric form
MCL	2	Salmon	29	Cox6c	10090.ENSMUSP00000014457	Cytochrome c oxidase subunit 6C; This protein is one of the nuclear-coded polypeptide chains of cytochrome c oxidase, the terminal oxidase in mitochondrial electron transport
MCL	2	Salmon	29	Cox7a1	10090.ENSMUSP00000096193	Cytochrome c oxidase subunit 7A1, mitochondrial; This protein is one of the nuclear-coded polypeptide chains of cytochrome c oxidase, the terminal oxidase in mitochondrial electron transport
MCL	2	Salmon	29	Cox7a2	10090.ENSMUSP00000034881	Cytochrome c oxidase subunit 7A2, mitochondrial; This protein is one of the nuclear-coded polypeptide chains of cytochrome c oxidase, the terminal oxidase in mitochondrial electron transport
MCL	2	Salmon	29	Cyc1	10090.ENSMUSP00000023210	Cytochrome c1, heme protein, mitochondrial; This is the heme-containing component of the cytochrome b-c1 complex, which accepts electrons from Rieske protein and transfers electrons to cytochrome c in the mitochondrial respiratory chain
MCL	2	Salmon	29	Gm10221	10090.ENSMUSP00000136375	ATP synthase subunit g, mitochondrial; Mitochondrial membrane ATP synthase (F(1)F(0) ATP synthase or Complex V) produces ATP from ADP in the presence of a proton gradient across the membrane which is generated by electron transport complexes of the respiratory chain. F-type ATPases consist of two structural domains, F(1) - containing the extramembraneous catalytic core, and F(0) - containing the …
MCL	2	Salmon	29	Gm10250	10090.ENSMUSP00000087974	ATP synthase subunit d, mitochondrial; Mitochondrial membrane ATP synthase (F(1)F(0) ATP synthase or Complex V) produces ATP from ADP in the presence of a proton gradient across the membrane which is generated by electron transport complexes of the respiratory chain. F-type ATPases consist of two structural domains, F(1) - containing the extramembraneous catalytic core, and F(0) - containing the …
MCL	2	Salmon	29	Immt	10090.ENSMUSP00000066181	MICOS complex subunit Mic60; Component of the MICOS complex, a large protein complex of the mitochondrial inner membrane that plays crucial roles in the maintenance of crista junctions, inner membrane architecture, and formation of contact sites to the outer membrane. Plays an important role in the maintenance of the MICOS complex stability and the mitochondrial cristae morphology
MCL	2	Salmon	29	Ndufa12	10090.ENSMUSP00000136313	NADH dehydrogenase [ubiquinone] 1 alpha subcomplex subunit 12; Accessory subunit of the mitochondrial membrane respiratory chain NADH dehydrogenase (Complex I), that is believed not to be involved in catalysis. Complex I functions in the transfer of electrons from NADH to the respiratory chain. The immediate electron acceptor for the enzyme is believed to be ubiquinone
MCL	2	Salmon	29	Ndufa6	10090.ENSMUSP00000023085	NADH dehydrogenase [ubiquinone] 1 alpha subcomplex subunit 6; Accessory subunit of the mitochondrial membrane respiratory chain NADH dehydrogenase (Complex I), that is believed to be not involved in catalysis. Complex I functions in the transfer of electrons from NADH to the respiratory chain. The immediate electron acceptor for the enzyme is believed to be ubiquinone
MCL	2	Salmon	29	Ndufa8	10090.ENSMUSP00000065352	NADH dehydrogenase [ubiquinone] 1 alpha subcomplex subunit 8; Accessory subunit of the mitochondrial membrane respiratory chain NADH dehydrogenase (Complex I), that is believed not to be involved in catalysis. Complex I functions in the transfer of electrons from NADH to the respiratory chain. The immediate electron acceptor for the enzyme is believed to be ubiquinone
MCL	2	Salmon	29	Ndufb10	10090.ENSMUSP00000043543	NADH dehydrogenase [ubiquinone] 1 beta subcomplex subunit 10; Accessory subunit of the mitochondrial membrane respiratory chain NADH dehydrogenase (Complex I), that is believed not to be involved in catalysis. Complex I functions in the transfer of electrons from NADH to the respiratory chain. The immediate electron acceptor for the enzyme is believed to be ubiquinone
MCL	2	Salmon	29	Ndufb4	10090.ENSMUSP00000023514	NADH dehydrogenase [ubiquinone] 1 beta subcomplex subunit 4; Accessory subunit of the mitochondrial membrane respiratory chain NADH dehydrogenase (Complex I), that is believed not to be involved in catalysis. Complex I functions in the transfer of electrons from NADH to the respiratory chain. The immediate electron acceptor for the enzyme is believed to be ubiquinone
MCL	2	Salmon	29	Ndufb5	10090.ENSMUSP00000114963	NADH dehydrogenase [ubiquinone] 1 beta subcomplex subunit 5, mitochondrial; Accessory subunit of the mitochondrial membrane respiratory chain NADH dehydrogenase (Complex I), that is believed not to be involved in catalysis. Complex I functions in the transfer of electrons from NADH to the respiratory chain. The immediate electron acceptor for the enzyme is believed to be ubiquinone
MCL	2	Salmon	29	Ndufb6	10090.ENSMUSP00000092746	NADH dehydrogenase [ubiquinone] 1 beta subcomplex subunit 6; Accessory subunit of the mitochondrial membrane respiratory chain NADH dehydrogenase (Complex I), that is believed not to be involved in catalysis. Complex I functions in the transfer of electrons from NADH to the respiratory chain. The immediate electron acceptor for the enzyme is believed to be ubiquinone
MCL	2	Salmon	29	Ndufb8	10090.ENSMUSP00000026222	NADH dehydrogenase [ubiquinone] 1 beta subcomplex subunit 8, mitochondrial; Accessory subunit of the mitochondrial membrane respiratory chain NADH dehydrogenase (Complex I), that is believed not to be involved in catalysis. Complex I functions in the transfer of electrons from NADH to the respiratory chain. The immediate electron acceptor for the enzyme is believed to be ubiquinone
MCL	2	Salmon	29	Ndufs3	10090.ENSMUSP00000005647	NADH dehydrogenase [ubiquinone] iron-sulfur protein 3, mitochondrial; Core subunit of the mitochondrial membrane respiratory chain NADH dehydrogenase (Complex I) that is believed to belong to the minimal assembly required for catalysis. Complex I functions in the transfer of electrons from NADH to the respiratory chain. The immediate electron acceptor for the enzyme is believed to be ubiquinone (…
MCL	2	Salmon	29	Ndufs7	10090.ENSMUSP00000101003	NADH dehydrogenase [ubiquinone] iron-sulfur protein 7, mitochondrial; Core subunit of the mitochondrial membrane respiratory chain NADH dehydrogenase (Complex I) that is believed to belong to the minimal assembly required for catalysis. Complex I functions in the transfer of electrons from NADH to the respiratory chain. The immediate electron acceptor for the enzyme is believed to be ubiquinone
MCL	2	Salmon	29	Ndufv1	10090.ENSMUSP00000042967	NADH dehydrogenase [ubiquinone] flavoprotein 1, mitochondrial; Core subunit of the mitochondrial membrane respiratory chain NADH dehydrogenase (Complex I) that is believed to belong to the minimal assembly required for catalysis. Complex I functions in the transfer of electrons from NADH to the respiratory chain. The immediate electron acceptor for the enzyme is believed to be ubiquinone (By simi…
MCL	2	Salmon	29	Sdhb	10090.ENSMUSP00000010007	Succinate dehydrogenase [ubiquinone] iron-sulfur subunit, mitochondrial; Iron-sulfur protein (IP) subunit of succinate dehydrogenase (SDH) that is involved in complex II of the mitochondrial electron transport chain and is responsible for transferring electrons from succinate to ubiquinone (coenzyme Q)
MCL	2	Salmon	29	Uqcrc1	10090.ENSMUSP00000026743	Cytochrome b-c1 complex subunit 1, mitochondrial; This is a component of the ubiquinol-cytochrome c reductase complex (complex III or cytochrome b-c1 complex), which is part of the mitochondrial respiratory chain. This protein may mediate formation of the complex between cytochromes c and c1 (By similarity); Belongs to the peptidase M16 family. UQCRC1/QCR1 subfamily
MCL	2	Salmon	29	Uqcrh	10090.ENSMUSP00000077744	Cytochrome b-c1 complex subunit 6, mitochondrial; This is a component of the ubiquinol-cytochrome c reductase complex (complex III or cytochrome b-c1 complex), which is part of the mitochondrial respiratory chain. This protein may mediate formation of the complex between cytochromes c and c1 (By similarity)
MCL	2	Salmon	29	Usmg5	10090.ENSMUSP00000093713	Up-regulated during skeletal muscle growth protein 5; Plays a critical role in maintaining the ATP synthase population in mitochondria
MCL	2	Salmon	29	mt-Nd5	10090.ENSMUSP00000081001	NADH-ubiquinone oxidoreductase chain 5; Core subunit of the mitochondrial membrane respiratory chain NADH dehydrogenase (Complex I) that is believed to belong to the minimal assembly required for catalysis. Complex I functions in the transfer of electrons from NADH to the respiratory chain. The immediate electron acceptor for the enzyme is believed to be ubiquinone (By similarity)
MCL	3	Fire Brick	29	Eef1a1	10090.ENSMUSP00000042457	Elongation factor 1-alpha 1; This protein promotes the GTP-dependent binding of aminoacyl-tRNA to the A-site of ribosomes during protein biosynthesis. With PARP1 and TXK, forms a complex that acts as a T helper 1 (Th1) cell-specific transcription factor and binds the promoter of IFN-gamma to directly regulate its transcription, and is thus involved importantly in Th1 cytokine production
MCL	3	Fire Brick	29	Eef2	10090.ENSMUSP00000046101	Elongation factor 2; Catalyzes the GTP-dependent ribosomal translocation step during translation elongation. During this step, the ribosome changes from the pre-translocational (PRE) to the post- translocational (POST) state as the newly formed A-site-bound peptidyl-tRNA and P-site-bound deacylated tRNA move to the P and E sites, respectively. Catalyzes the coordinated movement of the two tRNA mo…
MCL	3	Fire Brick	29	Eif2s1	10090.ENSMUSP00000071214	Eukaryotic translation initiation factor 2 subunit 1; Functions in the early steps of protein synthesis by forming a ternary complex with GTP and initiator tRNA. This complex binds to a 40S ribosomal subunit, followed by mRNA binding to form a 43S pre-initiation complex. Junction of the 60S ribosomal subunit to form the 80S initiation complex is preceded by hydrolysis of the GTP bound to eIF-2 an…
MCL	3	Fire Brick	29	Gm9493	10090.ENSMUSP00000100516	40S ribosomal protein S7; Predicted gene 9493; Belongs to the eukaryotic ribosomal protein eS7 family
MCL	3	Fire Brick	29	Gm9755	10090.ENSMUSP00000091180	Elongation factor Tu, mitochondrial; Predicted pseudogene 9755
MCL	3	Fire Brick	29	Macf1	10090.ENSMUSP00000119600	Microtubule-actin cross-linking factor 1; Isoform 2: F-actin-binding protein which plays a role in cross-linking actin to other cytoskeletal proteins and also binds to microtubules. Plays an important role in ERBB2-dependent stabilization of microtubules at the cell cortex (By similarity). Acts as a positive regulator of Wnt receptor signaling pathway and is involved in the translocation of AXIN1…
MCL	3	Fire Brick	29	Plec	10090.ENSMUSP00000075772	Plectin; Interlinks intermediate filaments with microtubules and microfilaments and anchors intermediate filaments to desmosomes or hemidesmosomes. May be involved not only in the cross-linking and stabilization of cytoskeletal intermediate filaments network, but also in the regulation of their dynamics; Belongs to the plakin or cytolinker family
MCL	3	Fire Brick	29	Ppp2r1a	10090.ENSMUSP00000007708	Serine/threonine-protein phosphatase 2A 65 kDa regulatory subunit A alpha isoform; The PR65 subunit of protein phosphatase 2A serves as a scaffolding molecule to coordinate the assembly of the catalytic subunit and a variable regulatory B subunit. Upon interaction with GNA12 promotes dephosphorylation of microtubule associated protein TAU/MAPT (By similarity). Required for proper chromosome segre…
MCL	3	Fire Brick	29	Rcc2	10090.ENSMUSP00000071163	Protein RCC2; Required for completion of mitosis and cytokinesis. May function as a guanine nucleotide exchange factor for the small GTPase RAC1 (By similarity)
MCL	3	Fire Brick	29	Rpl12	10090.ENSMUSP00000117461	60S ribosomal protein L12; Binds directly to 26S ribosomal RNA
MCL	3	Fire Brick	29	Rpl23	10090.ENSMUSP00000099435	Ribosomal protein L23
MCL	3	Fire Brick	29	Rpl26	10090.ENSMUSP00000073175	Ribosomal protein L26
MCL	3	Fire Brick	29	Rpl3	10090.ENSMUSP00000080354	60S ribosomal protein L3; The L3 protein is a component of the large subunit of cytoplasmic ribosomes
MCL	3	Fire Brick	29	Rpl6	10090.ENSMUSP00000031617	60S ribosomal protein L6; Component of the large ribosomal subunit
MCL	3	Fire Brick	29	Rpl7	10090.ENSMUSP00000071616	60S ribosomal protein L7; Component of the large ribosomal subunit (By similarity). Binds to G-rich structures in 28S rRNA and in mRNAs. Plays a regulatory role in the translation apparatus; inhibits cell-free translation of mRNAs (By similarity)
MCL	3	Fire Brick	29	Rpl9	10090.ENSMUSP00000109399	Ribosomal protein L9; Belongs to the universal ribosomal protein uL6 family
MCL	3	Fire Brick	29	Rplp0	10090.ENSMUSP00000083705	60S acidic ribosomal protein P0; Ribosomal protein P0 is the functional equivalent of E.coli protein L10
MCL	3	Fire Brick	29	Rplp2	10090.ENSMUSP00000081474	60S acidic ribosomal protein P2; Plays an important role in the elongation step of protein synthesis
MCL	3	Fire Brick	29	Rps11	10090.ENSMUSP00000003521	Ribosomal protein S11
MCL	3	Fire Brick	29	Rps12	10090.ENSMUSP00000073581	Ribosomal protein S12
MCL	3	Fire Brick	29	Rps13	10090.ENSMUSP00000126294	Ribosomal protein S13; Belongs to the universal ribosomal protein uS15 family
MCL	3	Fire Brick	29	Rps15a	10090.ENSMUSP00000119975	Ribosomal protein S15A; Belongs to the universal ribosomal protein uS8 family
MCL	3	Fire Brick	29	Rps19	10090.ENSMUSP00000104067	40S ribosomal protein S19; Required for pre-rRNA processing and maturation of 40S ribosomal subunits
MCL	3	Fire Brick	29	Rps3	10090.ENSMUSP00000032998	40S ribosomal protein S3; Involved in translation as a component of the 40S small ribosomal subunit (By similarity). Has endonuclease activity and plays a role in repair of damaged DNA. Cleaves phosphodiester bonds of DNAs containing altered bases with broad specificity and cleaves supercoiled DNA more efficiently than relaxed DNA (By similarity). Displays high binding affinity for 7,8-dihydro-8-…
MCL	3	Fire Brick	29	Rps5	10090.ENSMUSP00000004554	Ribosomal protein S5; Belongs to the universal ribosomal protein uS7 family
MCL	3	Fire Brick	29	Rps8	10090.ENSMUSP00000099757	Ribosomal protein S8; Belongs to the eukaryotic ribosomal protein eS8 family
MCL	3	Fire Brick	29	Rps9	10090.ENSMUSP00000006496	Ribosomal protein S9; Belongs to the universal ribosomal protein uS4 family
MCL	3	Fire Brick	29	Serbp1	10090.ENSMUSP00000039110	Plasminogen activator inhibitor 1 RNA-binding protein; May play a role in the regulation of mRNA stability. Binds to the 3'-most 134 nt of the SERPINE1/PAI1 mRNA, a region which confers cyclic nucleotide regulation of message decay
MCL	3	Fire Brick	29	Vars	10090.ENSMUSP00000084572	Valine--tRNA ligase; valyl-tRNA synthetase
MCL	4	Sandy Brown	21	Aco2	10090.ENSMUSP00000023116	Aconitate hydratase, mitochondrial; Catalyzes the isomerization of citrate to isocitrate via cis-aconitate; Belongs to the aconitase/IPM isomerase family
MCL	4	Sandy Brown	21	Akr1b3	10090.ENSMUSP00000100045	Aldose reductase; Catalyzes the NADPH-dependent reduction of a wide variety of carbonyl-containing compounds to their corresponding alcohols with a broad range of catalytic efficiencies
MCL	4	Sandy Brown	21	Cs	10090.ENSMUSP00000005826	Citrate synthase, mitochondrial; Citrate synthase
MCL	4	Sandy Brown	21	Eno1	10090.ENSMUSP00000079727	Alpha-enolase; Multifunctional enzyme that, as well as its role in glycolysis, plays a part in various processes such as growth control, hypoxia tolerance and allergic responses (By similarity). May also function in the intravascular and pericellular fibrinolytic system due to its ability to serve as a receptor and activator of plasminogen on the cell surface of several cell-types such as leukocy…
MCL	4	Sandy Brown	21	Eno3	10090.ENSMUSP00000072620	Beta-enolase; Appears to have a function in striated muscle development and regeneration
MCL	4	Sandy Brown	21	Fasn	10090.ENSMUSP00000052872	Fatty acid synthase; Fatty acid synthetase catalyzes the formation of long- chain fatty acids from acetyl-CoA, malonyl-CoA and NADPH. This multifunctional protein has 7 catalytic activities and an acyl carrier protein
MCL	4	Sandy Brown	21	Fh1	10090.ENSMUSP00000027810	Fumarate hydratase, mitochondrial; Fumarate hydratase 1
MCL	4	Sandy Brown	21	Glud1	10090.ENSMUSP00000022322	Glutamate dehydrogenase 1, mitochondrial; Mitochondrial glutamate dehydrogenase that converts L- glutamate into alpha-ketoglutarate. Plays a key role in glutamine anaplerosis by producing alpha-ketoglutarate, an important intermediate in the tricarboxylic acid cycle. May be involved in learning and memory reactions by increasing the turnover of the excitatory neurotransmitter glutamate
MCL	4	Sandy Brown	21	Ldha	10090.ENSMUSP00000103267	Lactate dehydrogenase A; Belongs to the LDH/MDH superfamily. LDH family
MCL	4	Sandy Brown	21	Mdh1	10090.ENSMUSP00000099938	Malate dehydrogenase, cytoplasmic; Malate dehydrogenase 1, NAD (soluble)
MCL	4	Sandy Brown	21	Mdh2	10090.ENSMUSP00000019323	Malate dehydrogenase 2, NAD (mitochondrial)
MCL	4	Sandy Brown	21	Pck1	10090.ENSMUSP00000029017	Phosphoenolpyruvate carboxykinase, cytosolic [GTP]; Catalyzes the conversion of oxaloacetate (OAA) to phosphoenolpyruvate (PEP), the rate-limiting step in the metabolic pathway that produces glucose from lactate and other precursors derived from the citric acid cycle
MCL	4	Sandy Brown	21	Pck2	10090.ENSMUSP00000038555	Phosphoenolpyruvate carboxykinase [GTP], mitochondrial; Catalyzes the conversion of oxaloacetate (OAA) to phosphoenolpyruvate (PEP), the rate-limiting step in the metabolic pathway that produces glucose from lactate and other precursors derived from the citric acid cycle
MCL	4	Sandy Brown	21	Pdha1	10090.ENSMUSP00000033662	Pyruvate dehydrogenase E1 component subunit alpha, somatic form, mitochondrial; The pyruvate dehydrogenase complex catalyzes the overall conversion of pyruvate to acetyl-CoA and CO(2), and thereby links the glycolytic pathway to the tricarboxylic cycle
MCL	4	Sandy Brown	21	Pdhb	10090.ENSMUSP00000022268	Pyruvate dehydrogenase E1 component subunit beta, mitochondrial; The pyruvate dehydrogenase complex catalyzes the overall conversion of pyruvate to acetyl-CoA and CO(2), and thereby links the glycolytic pathway to the tricarboxylic cycle
MCL	4	Sandy Brown	21	Pdhx	10090.ENSMUSP00000011058	Pyruvate dehydrogenase protein X component, mitochondrial; Required for anchoring dihydrolipoamide dehydrogenase (E3) to the dihydrolipoamide transacetylase (E2) core of the pyruvate dehydrogenase complexes of eukaryotes. This specific binding is essential for a functional PDH complex (By similarity)
MCL	4	Sandy Brown	21	Pkm	10090.ENSMUSP00000034834	Pyruvate kinase PKM; Glycolytic enzyme that catalyzes the transfer of a phosphoryl group from phosphoenolpyruvate (PEP) to ADP, generating ATP. Stimulates POU5F1-mediated transcriptional activation (By similarity)
MCL	4	Sandy Brown	21	Prdx2	10090.ENSMUSP00000005292	Peroxiredoxin-2; Thiol-specific peroxidase that catalyzes the reduction of hydrogen peroxide and organic hydroperoxides to water and alcohols, respectively. Plays a role in cell protection against oxidative stress by detoxifying peroxides and as sensor of hydrogen peroxide-mediated signaling events. Might participate in the signaling cascades of growth factors and tumor necrosis factor-alpha by r…
MCL	4	Sandy Brown	21	Slc25a12	10090.ENSMUSP00000122103	Calcium-binding mitochondrial carrier protein Aralar1; Catalyzes the calcium-dependent exchange of cytoplasmic glutamate with mitochondrial aspartate across the mitochondrial inner membrane. May have a function in the urea cycle (By similarity)
MCL	4	Sandy Brown	21	Tkt	10090.ENSMUSP00000022529	Transketolase; Catalyzes the transfer of a two-carbon ketol group from a ketose donor to an aldose acceptor, via a covalent intermediate with the cofactor thiamine pyrophosphate
MCL	4	Sandy Brown	21	Tpi1	10090.ENSMUSP00000130858	Triosephosphate isomerase 1; Belongs to the triosephosphate isomerase family
MCL	5	Brown	19	Bgn	10090.ENSMUSP00000033741	Biglycan; May be involved in collagen fiber assembly; Belongs to the small leucine-rich proteoglycan (SLRP) family. SLRP class I subfamily
MCL	5	Brown	19	Col11a1	10090.ENSMUSP00000089793	Collagen alpha-1(XI) chain; May play an important role in fibrillogenesis by controlling lateral growth of collagen II fibrils; Belongs to the fibrillar collagen family
MCL	5	Brown	19	Col12a1	10090.ENSMUSP00000071662	Collagen alpha-1(XII) chain; Type XII collagen interacts with type I collagen- containing fibrils, the COL1 domain could be associated with the surface of the fibrils, and the COL2 and NC3 domains may be localized in the perifibrillar matrix; Belongs to the fibril-associated collagens with interrupted helices (FACIT) family
MCL	5	Brown	19	Col15a1	10090.ENSMUSP00000099981	Collagen alpha-1(XV) chain; Structural protein that stabilizes microvessels and muscle cells, both in heart and in skeletal muscle; Belongs to the multiplexin collagen family
MCL	5	Brown	19	Col1a1	10090.ENSMUSP00000001547	Collagen alpha-1(I) chain; Type I collagen is a member of group I collagen (fibrillar forming collagen); Belongs to the fibrillar collagen family
MCL	5	Brown	19	Col1a2	10090.ENSMUSP00000031668	Collagen alpha-2(I) chain; Type I collagen is a member of group I collagen (fibrillar forming collagen); Belongs to the fibrillar collagen family
MCL	5	Brown	19	Col22a1	10090.ENSMUSP00000125069	Collagen, type XXII, alpha 1
MCL	5	Brown	19	Col3a1	10090.ENSMUSP00000085192	Collagen alpha-1(III) chain; Collagen type III occurs in most soft connective tissues along with type I collagen. Involved in regulation of cortical development. Is the major ligand of ADGRG1 in the developing brain and binding to ADGRG1 inhibits neuronal migration and activates the RhoA pathway by coupling ADGRG1 to GNA13 and possibly GNA12
MCL	5	Brown	19	Col5a1	10090.ENSMUSP00000028280	Collagen alpha-1(V) chain; Type V collagen is a member of group I collagen (fibrillar forming collagen). It is a minor connective tissue component of nearly ubiquitous distribution. Type V collagen binds to DNA, heparan sulfate, thrombospondin, heparin, and insulin (By similarity). Transcriptionally activated by CEBPZ, which recognizes a CCAAT-like motif, CAAAT in the COL5A1 promoter
MCL	5	Brown	19	Col5a2	10090.ENSMUSP00000083620	Collagen alpha-2(V) chain; Type V collagen is a member of group I collagen (fibrillar forming collagen). It is a minor connective tissue component of nearly ubiquitous distribution. Type V collagen binds to DNA, heparan sulfate, thrombospondin, heparin, and insulin. Type V collagen is a key determinant in the assembly of tissue- specific matrices
MCL	5	Brown	19	Col6a1	10090.ENSMUSP00000001147	Collagen alpha-1(VI) chain; Collagen VI acts as a cell-binding protein; Belongs to the type VI collagen family
MCL	5	Brown	19	Col6a2	10090.ENSMUSP00000001181	Collagen alpha-2(VI) chain; Collagen VI acts as a cell-binding protein
MCL	5	Brown	19	Col6a3	10090.ENSMUSP00000057131	Collagen, type VI, alpha 3
MCL	5	Brown	19	Dcn	10090.ENSMUSP00000100924	Decorin; May affect the rate of fibrils formation; Belongs to the small leucine-rich proteoglycan (SLRP) family. SLRP class I subfamily
MCL	5	Brown	19	Lum	10090.ENSMUSP00000040877	Lumican; Belongs to the small leucine-rich proteoglycan (SLRP) family. SLRP class II subfamily
MCL	5	Brown	19	P4hb	10090.ENSMUSP00000026122	Protein disulfide-isomerase; This multifunctional protein catalyzes the formation, breakage and rearrangement of disulfide bonds. At the cell surface, seems to act as a reductase that cleaves disulfide bonds of proteins attached to the cell. May therefore cause structural modifications of exofacial proteins. Inside the cell, seems to form/rearrange disulfide bonds of nascent proteins. At high con…
MCL	5	Brown	19	Pdgfrb	10090.ENSMUSP00000025522	Platelet-derived growth factor receptor beta; Tyrosine-protein kinase that acts as cell-surface receptor for homodimeric PDGFB and PDGFD and for heterodimers formed by PDGFA and PDGFB, and plays an essential role in the regulation of embryonic development, cell proliferation, survival, differentiation, chemotaxis and migration. Plays an essential role in blood vessel development by promoting prol…
MCL	5	Brown	19	Postn	10090.ENSMUSP00000072773	Periostin; Induces cell attachment and spreading and plays a role in cell adhesion. Enhances incorporation of BMP1 in the fibronectin matrix of connective tissues, and subsequent proteolytic activation of lysyl oxidase LOX
MCL	5	Brown	19	Serpinh1	10090.ENSMUSP00000126390	Serpin H1; Binds specifically to collagen. Could be involved as a chaperone in the biosynthetic pathway of collagen
MCL	6	Yellow	16	Ahnak	10090.ENSMUSP00000090633	AHNAK nucleoprotein (desmoyokin)
MCL	6	Yellow	16	Anxa2	10090.ENSMUSP00000034756	Annexin A2; Calcium-regulated membrane-binding protein whose affinity for calcium is greatly enhanced by anionic phospholipids. It binds two calcium ions with high affinity. May be involved in heat-stress response (By similarity). Inhibits PCSK9-enhanced LDLR degradation, probably reduces PCSK9 protein levels via a translational mechanism but also competes with LDLR for binding with PCSK9; Belong…
MCL	6	Yellow	16	Cyb5r3	10090.ENSMUSP00000018186	NADH-cytochrome b5 reductase 3; Desaturation and elongation of fatty acids, cholesterol biosynthesis, drug metabolism, and, in erythrocyte, methemoglobin reduction
MCL	6	Yellow	16	Gdi2	10090.ENSMUSP00000062996	Rab GDP dissociation inhibitor beta; Regulates the GDP/GTP exchange reaction of most Rab proteins by inhibiting the dissociation of GDP from them, and the subsequent binding of GTP to them
MCL	6	Yellow	16	Grn	10090.ENSMUSP00000046340	Granulins; Granulins have possible cytokine-like activity. They may play a role in inflammation, wound repair, and tissue remodeling. Acts as an autocrine growth factor for PC cells
MCL	6	Yellow	16	Hmmr	10090.ENSMUSP00000020579	Hyaluronan mediated motility receptor; Receptor for hyaluronic acid (HA). Involved in cell motility. When hyaluronan binds to HMMR, the phosphorylation of a number of proteins, including the PTK2/FAK1 occurs. May also be involved in cellular transformation and metastasis formation, and in regulating extracellular-regulated kinase (ERK) activity. May act as a regulator of adipogenesis
MCL	6	Yellow	16	Padi2	10090.ENSMUSP00000030765	Protein-arginine deiminase type-2; Catalyzes the deimination of arginine residues of proteins; Belongs to the protein arginine deiminase family
MCL	6	Yellow	16	Rab27b	10090.ENSMUSP00000114094	Ras-related protein Rab-27B; May be involved in targeting uroplakins to urothelial apical membranes
MCL	6	Yellow	16	S100a10	10090.ENSMUSP00000036949	Protein S100-A10; Because S100A10 induces the dimerization of ANXA2/p36, it may function as a regulator of protein phosphorylation in that the ANXA2 monomer is the preferred target (in vitro) of tyrosine- specific kinase; Belongs to the S-100 family
MCL	6	Yellow	16	Tubb4b	10090.ENSMUSP00000042342	Tubulin beta-4B chain; Tubulin is the major constituent of microtubules. It binds two moles of GTP, one at an exchangeable site on the beta chain and one at a non-exchangeable site on the alpha chain
MCL	6	Yellow	16	Tubb5	10090.ENSMUSP00000001566	Tubulin beta-5 chain; Tubulin is the major constituent of microtubules. It binds two moles of GTP, one at an exchangeable site on the beta chain and one at a non-exchangeable site on the alpha chain; Belongs to the tubulin family
MCL	6	Yellow	16	Vat1	10090.ENSMUSP00000048350	Synaptic vesicle membrane protein VAT-1 homolog; Plays a part in calcium-regulated keratinocyte activation in epidermal repair mechanisms. Has no effect on cell proliferation (By similarity). Possesses ATPase activity. Negatively regulates mitochondrial fusion in cooperation with mitofusin proteins (MFN1-2) (By similarity)
MCL	6	Yellow	16	Vcp	10090.ENSMUSP00000030164	Transitional endoplasmic reticulum ATPase; Necessary for the fragmentation of Golgi stacks during mitosis and for their reassembly after mitosis. Involved in the formation of the transitional endoplasmic reticulum (tER). The transfer of membranes from the endoplasmic reticulum to the Golgi apparatus occurs via 50-70 nm transition vesicles which derive from part-rough, part-smooth transitional ele…
MCL	6	Yellow	16	Ywhab	10090.ENSMUSP00000018470	14-3-3 protein beta/alpha; Adapter protein implicated in the regulation of a large spectrum of both general and specialized signaling pathways. Binds to a large number of partners, usually by recognition of a phosphoserine or phosphothreonine motif. Binding generally results in the modulation of the activity of the binding partner. Negative regulator of osteogenesis. Blocks the nuclear translocat…
MCL	6	Yellow	16	Ywhae	10090.ENSMUSP00000070993	14-3-3 protein epsilon; Adapter protein implicated in the regulation of a large spectrum of both general and specialized signaling pathways. Binds to a large number of partners, usually by recognition of a phosphoserine or phosphothreonine motif. Binding generally results in the modulation of the activity of the binding partner. Positively regulates phosphorylated protein HSF1 nuclear export to t…
MCL	6	Yellow	16	Ywhaz	10090.ENSMUSP00000022894	14-3-3 protein zeta/delta; Adapter protein implicated in the regulation of a large spectrum of both general and specialized signaling pathways. Binds to a large number of partners, usually by recognition of a phosphoserine or phosphothreonine motif. Binding generally results in the modulation of the activity of the binding partner
MCL	7	Dark Golden Rod	13	Hnrnpa1	10090.ENSMUSP00000042658	Heterogeneous nuclear ribonucleoprotein A1
MCL	7	Dark Golden Rod	13	Hnrnpa2b1	10090.ENSMUSP00000110103	Heterogeneous nuclear ribonucleoproteins A2/B1; Heterogeneous nuclear ribonucleoprotein (hnRNP) that associates with nascent pre-mRNAs, packaging them into hnRNP particles. The hnRNP particle arrangement on nascent hnRNA is non- random and sequence-dependent and serves to condense and stabilize the transcripts and minimize tangling and knotting. Packaging plays a role in various processes such as…
MCL	7	Dark Golden Rod	13	Hnrnpk	10090.ENSMUSP00000039269	Heterogeneous nuclear ribonucleoprotein K; One of the major pre-mRNA-binding proteins. Binds tenaciously to poly(C) sequences. Likely to play a role in the nuclear metabolism of hnRNAs, particularly for pre-mRNAs that contain cytidine-rich sequences. Can also bind poly(C) single- stranded DNA. Plays an important role in p53/TP53 response to DNA damage, acting at the level of both transcription ac…
MCL	7	Dark Golden Rod	13	Hspa5	10090.ENSMUSP00000097747	78 kDa glucose-regulated protein; Plays a role in facilitating the assembly of multimeric protein complexes inside the endoplasmic reticulum. Involved in the correct folding of proteins and degradation of misfolded proteins via its interaction with DNAJC10, probably to facilitate the release of DNAJC10 from its substrate; Belongs to the heat shock protein 70 family
MCL	7	Dark Golden Rod	13	Hspa8	10090.ENSMUSP00000015800	Heat shock cognate 71 kDa protein; Molecular chaperone implicated in a wide variety of cellular processes, including protection of the proteome from stress, folding and transport of newly synthesized polypeptides, activation of proteolysis of misfolded proteins and the formation and dissociation of protein complexes. Plays a pivotal role in the protein quality control system, ensuring the correct…
MCL	7	Dark Golden Rod	13	Hspb1	10090.ENSMUSP00000005077	Heat shock protein beta-1; Small heat shock protein which functions as a molecular chaperone probably maintaining denatured proteins in a folding- competent state. Plays a role in stress resistance and actin organization. Through its molecular chaperone activity may regulate numerous biological processes including the phosphorylation and the axonal transport of neurofilament proteins (By similari…
MCL	7	Dark Golden Rod	13	Ncl	10090.ENSMUSP00000027438	Nucleolin; Nucleolin is the major nucleolar protein of growing eukaryotic cells. It is found associated with intranucleolar chromatin and pre-ribosomal particles. It induces chromatin decondensation by binding to histone H1. It is thought to play a role in pre-rRNA transcription and ribosome assembly. May play a role in the process of transcriptional elongation. Binds RNA oligonucleotides with 5'…
MCL	7	Dark Golden Rod	13	Nono	10090.ENSMUSP00000033673	Non-POU domain-containing octamer-binding protein; DNA- and RNA binding protein, involved in several nuclear processes. Binds the conventional octamer sequence in double-stranded DNA. Also binds single-stranded DNA and RNA at a site independent of the duplex site. Involved in pre-mRNA splicing, probably as a heterodimer with SFPQ. Interacts with U5 snRNA, probably by binding to a purine-rich sequ…
MCL	7	Dark Golden Rod	13	Pabpc1	10090.ENSMUSP00000001809	Polyadenylate-binding protein 1; Binds the poly(A) tail of mRNA, including that of its own transcript. May be involved in cytoplasmic regulatory processes of mRNA metabolism such as pre-mRNA splicing. Its function in translational initiation regulation can either be enhanced by PAIP1 or repressed by PAIP2. Can probably bind to cytoplasmic RNA sequences other than poly(A) in vivo. Involved in tran…
MCL	7	Dark Golden Rod	13	Prpf31	10090.ENSMUSP00000008517	U4/U6 small nuclear ribonucleoprotein Prp31; Involved in pre-mRNA splicing. Required for the assembly of the U4/U5/U6 tri-snRNP complex, one of the building blocks of the spliceosome (By similarity); Belongs to the PRP31 family
MCL	7	Dark Golden Rod	13	Snrpd3	10090.ENSMUSP00000020397	Small nuclear ribonucleoprotein Sm D3; Core component of the spliceosomal U1, U2, U4 and U5 small nuclear ribonucleoproteins (snRNPs), the building blocks of the spliceosome. Thereby, plays an important role in the splicing of cellular pre-mRNAs. Most spliceosomal snRNPs contain a common set of Sm proteins SNRPB, SNRPD1, SNRPD2, SNRPD3, SNRPE, SNRPF and SNRPG that assemble in a heptameric protein…
MCL	7	Dark Golden Rod	13	Strap	10090.ENSMUSP00000068267	Serine-threonine kinase receptor-associated protein; The SMN complex plays a catalyst role in the assembly of small nuclear ribonucleoproteins (snRNPs), the building blocks of the spliceosome. Thereby, plays an important role in the splicing of cellular pre-mRNAs. Most spliceosomal snRNPs contain a common set of Sm proteins SNRPB, SNRPD1, SNRPD2, SNRPD3, SNRPE, SNRPF and SNRPG that assemble in a …
MCL	7	Dark Golden Rod	13	Tpr	10090.ENSMUSP00000117616	Nucleoprotein TPR; Component of the nuclear pore complex (NPC), a complex required for the trafficking across the nuclear envelope. Functions as a scaffolding element in the nuclear phase of the NPC essential for normal nucleocytoplasmic transport of proteins and mRNAs, plays a role in the establishment of nuclear-peripheral chromatin compartmentalization in interphase, and in the mitotic spindle…
MCL	8	Khaki	12	Anpep	10090.ENSMUSP00000103015	Aminopeptidase N; Broad specificity aminopeptidase which plays a role in the final digestion of peptides generated from hydrolysis of proteins by gastric and pancreatic proteases. Also involved in the processing of various peptides including peptide hormones, such as angiotensin III and IV, neuropeptides, and chemokines (By similarity). May also be involved the cleavage of peptides bound to major…
MCL	8	Khaki	12	Atad3a	10090.ENSMUSP00000030903	ATPase family AAA domain-containing protein 3; Essential for mitochondrial network organization, mitochondrial metabolism and cell growth at organism and cellular level. May play an important role in mitochondrial protein synthesis. May also participate in mitochondrial DNA replication. May bind to mitochondrial DNA D-loops and contribute to nucleoid stability. Required for enhanced channeling of…
MCL	8	Khaki	12	Cd44	10090.ENSMUSP00000005218	CD44 antigen; Receptor for hyaluronic acid (HA). Mediates cell-cell and cell-matrix interactions through its affinity for HA, and possibly also through its affinity for other ligands such as osteopontin, collagens, and matrix metalloproteinases (MMPs). Adhesion with HA plays an important role in cell migration, tumor growth and progression. In cancer cells, may play an important role in invadopod…
MCL	8	Khaki	12	Cd9	10090.ENSMUSP00000032492	CD9 antigen; Involved in platelet activation and aggregation. Regulates paranodal junction formation. Involved in cell adhesion, cell motility and tumor metastasis. Required for sperm-egg fusion (By similarity). Acts as a receptor for PSG17
MCL	8	Khaki	12	Hspg2	10090.ENSMUSP00000131316	Basement membrane-specific heparan sulfate proteoglycan core protein; Perlecan (heparan sulfate proteoglycan 2)
MCL	8	Khaki	12	Ilk	10090.ENSMUSP00000033182	Integrin-linked protein kinase; Receptor-proximal protein kinase regulating integrin- mediated signal transduction. May act as a mediator of inside-out integrin signaling. Focal adhesion protein part of the complex ILK-PINCH. This complex is considered to be one of the convergence points of integrin- and growth factor-signaling pathway. Could be implicated in mediating cell architecture, adhesion…
MCL	8	Khaki	12	Itgb1	10090.ENSMUSP00000087457	Integrin beta-1; Integrins alpha-1/beta-1, alpha-2/beta-1, alpha-10/beta- 1 and alpha-11/beta-1 are receptors for collagen. Integrins alpha- 1/beta-1 and alpha-2/beta-2 recognize the proline-hydroxylated sequence G-F-P-G-E-R in collagen. Integrins alpha-2/beta-1, alpha- 3/beta-1, alpha-4/beta-1, alpha-5/beta-1, alpha-8/beta-1, alpha- 10/beta-1, alpha-11/beta-1 and alpha-V/beta-1 are receptors for…
MCL	8	Khaki	12	Lgals3	10090.ENSMUSP00000114350	Galectin-3; Galactose-specific lectin which binds IgE. May mediate with the alpha-3, beta-1 integrin the stimulation by CSPG4 of endothelial cells migration. Together with DMBT1, required for terminal differentiation of columnar epithelial cells during early embryogenesis. In the nucleus: acts as a pre-mRNA splicing factor. Involved in acute inflammatory responses including neutrophil activation …
MCL	8	Khaki	12	Phb	10090.ENSMUSP00000119603	Prohibitin; Prohibitin inhibits DNA synthesis. It has a role in regulating proliferation. As yet it is unclear if the protein or the mRNA exhibits this effect. May play a role in regulating mitochondrial respiration activity and in aging (By similarity)
MCL	8	Khaki	12	Ptprc	10090.ENSMUSP00000138350	Receptor-type tyrosine-protein phosphatase C; Protein tyrosine-protein phosphatase required for T-cell activation through the antigen receptor. Acts as a positive regulator of T-cell coactivation upon binding to DPP4. The first PTPase domain has enzymatic activity, while the second one seems to affect the substrate specificity of the first one. Upon T-cell activation, recruits and dephosphorylate…
MCL	8	Khaki	12	Tnc	10090.ENSMUSP00000102995	Tenascin; Extracellular matrix protein implicated in guidance of migrating neurons as well as axons during development, synaptic plasticity as well as neuronal regeneration. Promotes neurite outgrowth when provided to neurons in culture. May play a role in supporting the growth of epithelial tumors. Ligand for integrins ITGA8:ITGB1, ITGA9:ITGB1, ITGAV:ITGB3 and ITGAV:ITGB6. In tumors, stimulates …
MCL	8	Khaki	12	Tnn	10090.ENSMUSP00000039452	Tenascin-N; Extracellular matrix protein that seems to be a ligand for ITGA8:ITGB1, ITGAV:ITGB1 and ITGA4:ITGB1 (By similarity). Involved in neurite outgrowth and cell migration in hippocampal explants. During endochondral bone formation, inhibits proliferation and differentiation of proteoblasts mediated by canonical WNT signaling. In tumors, stimulates angiogenesis by elongation, migration and …
MCL	9	Olive Drab	10	Actb	10090.ENSMUSP00000098066	Actin, cytoplasmic 1; Actins are highly conserved proteins that are involved in various types of cell motility and are ubiquitously expressed in all eukaryotic cells; Belongs to the actin family
MCL	9	Olive Drab	10	Cdc42	10090.ENSMUSP00000054634	Cell division control protein 42 homolog; Plasma membrane-associated small GTPase which cycles between an active GTP-bound and an inactive GDP-bound state. In active state binds to a variety of effector proteins to regulate cellular responses. Involved in epithelial cell polarization processes. Regulates the bipolar attachment of spindle microtubules to kinetochores before chromosome congression …
MCL	9	Olive Drab	10	Cfl1	10090.ENSMUSP00000112259	Cofilin-1; Binds to F-actin and exhibits pH-sensitive F-actin depolymerizing activity. Regulates actin cytoskeleton dynamics. Important for normal progress through mitosis and normal cytokinesis. Plays a role in the regulation of cell morphology and cytoskeletal organization. Required for the up-regulation of atypical chemokine receptor ACKR2 from endosomal compartment to cell membrane, increasin…
MCL	9	Olive Drab	10	Ctnnd1	10090.ENSMUSP00000064518	Catenin (cadherin associated protein), delta 1; Binds to and inhibits the transcriptional repressor ZBTB33, which may lead to activation of target genes of the Wnt signaling pathway (By similarity). Associates with and regulates the cell adhesion properties of both C-, E- and N-cadherins, being critical for their surface stability. Implicated both in cell transformation by SRC and in ligand-induc…
MCL	9	Olive Drab	10	Flna	10090.ENSMUSP00000033699	Filamin-A; Actin binding protein that promotes orthogonal branching of actin filaments and links actin filaments to membrane glycoproteins. Anchors various transmembrane proteins to the actin cytoskeleton and serves as a scaffold for a wide range of cytoplasmic signaling proteins (By similarity). Interaction with FLNA may allow neuroblast migration from the ventricular zone into the cortical plat…
MCL	9	Olive Drab	10	Gsn	10090.ENSMUSP00000028239	Gelsolin; Calcium-regulated, actin-modulating protein that binds to the plus (or barbed) ends of actin monomers or filaments, preventing monomer exchange (end-blocking or capping). It can promote the assembly of monomers into filaments (nucleation) as well as sever filaments already formed. Plays a role in ciliogenesis; Belongs to the villin/gelsolin family
MCL	9	Olive Drab	10	Lcp1	10090.ENSMUSP00000116271	Plastin-2; Actin-binding protein. Plays a role in the activation of T-cells in response to costimulation through TCR/CD3 and CD2 or CD28. Modulates the cell surface expression of IL2RA/CD25 and CD69
MCL	9	Olive Drab	10	Pdlim5	10090.ENSMUSP00000029941	PDZ and LIM domain protein 5; May play an important role in the heart development by scaffolding PKC to the Z-disk region. Isoform 2 and isoform 3 may negatively modulate the scaffolding activity of isoform 1. May play a role in the regulation of cardiomyocyte expansion. Overexpression promotes the development of heart hypertrophy. Contributes to the regulation of dendritic spine morphogenesis in…
MCL	9	Olive Drab	10	Vcam1	10090.ENSMUSP00000029574	Vascular cell adhesion protein 1; Important in cell-cell recognition. Appears to function in leukocyte-endothelial cell adhesion. Interacts with integrin alpha-4/beta-1 (ITGA4/ITGB1) on leukocytes, and mediates both adhesion and signal transduction. The VCAM1/ITGA4/ITGB1 interaction may play a pathophysiologic role both in immune responses and in leukocyte emigration to sites of inflammation
MCL	9	Olive Drab	10	Vcl	10090.ENSMUSP00000022369	Vinculin; Actin filament (F-actin)-binding protein involved in cell-matrix adhesion and cell-cell adhesion. Regulates cell- surface E-cadherin expression and potentiates mechanosensing by the E-cadherin complex. May also play important roles in cell morphology and locomotion (By similarity); Belongs to the vinculin/alpha-catenin family
MCL	10	Green	10	Chd1	10090.ENSMUSP00000024627	Chromodomain-helicase-DNA-binding protein 1; ATP-dependent chromatin-remodeling factor which functions as substrate recognition component of the transcription regulatory histone acetylation (HAT) complex SAGA. Regulates polymerase II transcription. Also required for efficient transcription by RNA polymerase I, and more specifically the polymerase I transcription termination step. Regulates negati…
MCL	10	Green	10	Dek	10090.ENSMUSP00000021807	Protein DEK; Involved in chromatin organization
MCL	10	Green	10	H1f0	10090.ENSMUSP00000137309	Histone H1.0; Histones H1 are necessary for the condensation of nucleosome chains into higher-order structures. The H1F0 histones are found in cells that are in terminal stages of differentiation or that have low rates of cell division
MCL	10	Green	10	H3f3a	10090.ENSMUSP00000124509	Histone H3.3; Variant histone H3 which replaces conventional H3 in a wide range of nucleosomes in active genes. Constitutes the predominant form of histone H3 in non-dividing cells and is incorporated into chromatin independently of DNA synthesis. Deposited at sites of nucleosomal displacement throughout transcribed genes, suggesting that it represents an epigenetic imprint of transcriptionally a…
MCL	10	Green	10	Hist2h3c2	10090.ENSMUSP00000135215	Histone H3.2; Core component of nucleosome. Nucleosomes wrap and compact DNA into chromatin, limiting DNA accessibility to the cellular machineries which require DNA as a template. Histones thereby play a central role in transcription regulation, DNA repair, DNA replication and chromosomal stability. DNA accessibility is regulated via a complex set of post-translational modifications of histones,…
MCL	10	Green	10	Hist4h4	10090.ENSMUSP00000136357	Histone H4; Core component of nucleosome. Nucleosomes wrap and compact DNA into chromatin, limiting DNA accessibility to the cellular machineries which require DNA as a template. Histones thereby play a central role in transcription regulation, DNA repair, DNA replication and chromosomal stability. DNA accessibility is regulated via a complex set of post-translational modifications of histones, a…
MCL	10	Green	10	Hmgb1	10090.ENSMUSP00000082682	High mobility group protein B1; Multifunctional redox sensitive protein with various roles in different cellular compartments. In the nucleus is one of the major chromatin-associated non-histone proteins and acts as a DNA chaperone involved in replication, transcription, chromatin remodeling, V(D)J recombination, DNA repair and genome stability. Proposed to be an universal biosensor for nucleic a…
MCL	10	Green	10	Lmna	10090.ENSMUSP00000029699	Prelamin-A/C; Lamins are components of the nuclear lamina, a fibrous layer on the nucleoplasmic side of the inner nuclear membrane, which is thought to provide a framework for the nuclear envelope and may also interact with chromatin. Lamin A and C are present in equal amounts in the lamina of mammals. Plays an important role in nuclear assembly, chromatin organization, nuclear membrane and telom…
MCL	10	Green	10	Sun2	10090.ENSMUSP00000086724	SUN domain-containing protein 2; As a component of the LINC (LInker of Nucleoskeleton and Cytoskeleton) complex, involved in the connection between the nuclear lamina and the cytoskeleton. The nucleocytoplasmic interactions established by the LINC complex play an important role in the transmission of mechanical forces across the nuclear envelope and in nuclear movement and positioning. Specifical…
MCL	10	Green	10	Syne2	10090.ENSMUSP00000047697	Nesprin-2; Multi-isomeric modular protein which forms a linking network between organelles and the actin cytoskeleton to maintain the subcellular spatial organization. As a component of the LINC (LInker of Nucleoskeleton and Cytoskeleton) complex involved in the connection between the nuclear lamina and the cytoskeleton. The nucleocytoplasmic interactions established by the LINC complex play an i…
MCL	11	Cyan	8	Actn4	10090.ENSMUSP00000066068	Alpha-actinin-4; F-actin cross-linking protein which is thought to anchor actin to a variety of intracellular structures. This is a bundling protein. Probably involved in vesicular trafficking via its association with the CART complex. The CART complex is necessary for efficient transferrin receptor recycling but not for EGFR degradation (By similarity). Involved in tight junction assembly in epi…
MCL	11	Cyan	8	Alb	10090.ENSMUSP00000031314	Serum albumin; Serum albumin, the main protein of plasma, has a good binding capacity for water, Ca(2+), Na(+), K(+), fatty acids, hormones, bilirubin and drugs. Its main function is the regulation of the colloidal osmotic pressure of blood. Major zinc transporter in plasma, typically binds about 80% of all plasma zinc; Belongs to the ALB/AFP/VDB family
MCL	11	Cyan	8	Aldoa	10090.ENSMUSP00000084846	Fructose-bisphosphate aldolase A; Plays a key role in glycolysis and gluconeogenesis. In addition, may also function as scaffolding protein (By similarity); Belongs to the class I fructose-bisphosphate aldolase family
MCL	11	Cyan	8	Clu	10090.ENSMUSP00000022616	Clusterin; Functions as extracellular chaperone that prevents aggregation of nonnative proteins. Prevents stress-induced aggregation of blood plasma proteins. Inhibits formation of amyloid fibrils by APP, APOC2, B2M, CALCA, CSN3, SNCA and aggregation-prone LYZ variants (in vitro). Does not require ATP. Maintains partially unfolded proteins in a state appropriate for subsequent refolding by other …
MCL	11	Cyan	8	Lta4h	10090.ENSMUSP00000016033	Leukotriene A-4 hydrolase; Epoxide hydrolase that catalyzes the final step in the biosynthesis of the proinflammatory mediator leukotriene B4. Has also aminopeptidase activity
MCL	11	Cyan	8	Ltf	10090.ENSMUSP00000035077	Lactotransferrin; Transferrins are iron binding transport proteins which can bind two Fe(3+) ions in association with the binding of an anion, usually bicarbonate
MCL	11	Cyan	8	Ola1	10090.ENSMUSP00000028517	Obg-like ATPase 1; Hydrolyzes ATP, and can also hydrolyze GTP with lower efficiency. Has lower affinity for GTP
MCL	11	Cyan	8	Pros1	10090.ENSMUSP00000023629	Vitamin K-dependent protein S; Anticoagulant plasma protein; it is a cofactor to activated protein C in the degradation of coagulation factors Va and VIIIa. It helps to prevent coagulation and stimulating fibrinolysis
MCL	12	Sky Blue 2	7	Capza2	10090.ENSMUSP00000015877	F-actin-capping protein subunit alpha-2; F-actin-capping proteins bind in a Ca(2+)-independent manner to the fast growing ends of actin filaments (barbed end) thereby blocking the exchange of subunits at these ends. Unlike other capping proteins (such as gelsolin and severin), these proteins do not sever actin filaments
MCL	12	Sky Blue 2	7	Capzb	10090.ENSMUSP00000099565	F-actin-capping protein subunit beta; F-actin-capping proteins bind in a Ca(2+)-independent manner to the fast growing ends of actin filaments (barbed end) thereby blocking the exchange of subunits at these ends. Unlike other capping proteins (such as gelsolin and severin), these proteins do not sever actin filaments. Isoform 3 may play a role in spermatogenesis. Alternatively, may play a role in…
MCL	12	Sky Blue 2	7	Copg2	10090.ENSMUSP00000038368	Coatomer subunit gamma-2; The coatomer is a cytosolic protein complex that binds to dilysine motifs and reversibly associates with Golgi non- clathrin-coated vesicles, which further mediate biosynthetic protein transport from the ER, via the Golgi up to the trans Golgi network. Coatomer complex is required for budding from Golgi membranes, and is essential for the retrograde Golgi-to-ER transport…
MCL	12	Sky Blue 2	7	Dctn2	10090.ENSMUSP00000026479	Dynactin subunit 2; Modulates cytoplasmic dynein binding to an organelle, and plays a role in prometaphase chromosome alignment and spindle organization during mitosis. Involved in anchoring microtubules to centrosomes. May play a role in synapse formation during brain development; Belongs to the dynactin subunit 2 family
MCL	12	Sky Blue 2	7	Gbf1	10090.ENSMUSP00000026254	Golgi-specific brefeldin A-resistance factor 1
MCL	12	Sky Blue 2	7	Sptb	10090.ENSMUSP00000021458	Spectrin beta chain, erythrocytic; Spectrin is the major constituent of the cytoskeletal network underlying the erythrocyte plasma membrane. It associates with band 4.1 and actin to form the cytoskeletal superstructure of the erythrocyte plasma membrane
MCL	12	Sky Blue 2	7	Tmed10	10090.ENSMUSP00000037583	Transmembrane emp24 domain-containing protein 10; Involved in vesicular protein trafficking. Mainly functions in the early secretory pathway. Thought to act as cargo receptor at the lumenal side for incorporation of secretory cargo molecules into transport vesicles and to be involved in vesicle coat formation at the cytoplasmic side. In COPII vesicle-mediated anterograde transport involved in the…
MCL	13	Sky Blue	5	Ptrh2	10090.ENSMUSP00000103657	Peptidyl-tRNA hydrolase 2, mitochondrial; The natural substrate for this enzyme may be peptidyl- tRNAs which drop off the ribosome during protein synthesis
MCL	13	Sky Blue	5	Tomm22	10090.ENSMUSP00000023062	Mitochondrial import receptor subunit TOM22 homolog; Central receptor component of the translocase of the outer membrane of mitochondria (TOM complex) responsible for the recognition and translocation of cytosolically synthesized mitochondrial preproteins. Together with the peripheral receptor TOM20 functions as the transit peptide receptor and facilitates the movement of preproteins into the tra…
MCL	13	Sky Blue	5	Vdac1	10090.ENSMUSP00000099819	Voltage-dependent anion-selective channel protein 1; Forms a channel through the mitochondrial outer membrane and also the plasma membrane. The channel at the outer mitochondrial membrane allows diffusion of small hydrophilic molecules; in the plasma membrane it is involved in cell volume regulation and apoptosis. It adopts an open conformation at low or zero membrane potential and a closed confo…
MCL	13	Sky Blue	5	Vdac2	10090.ENSMUSP00000022293	Voltage-dependent anion-selective channel protein 2; Forms a channel through the mitochondrial outer membrane that allows diffusion of small hydrophilic molecules. The channel adopts an open conformation at low or zero membrane potential and a closed conformation at potentials above 30-40 mV. The open state has a weak anion selectivity whereas the closed state is cation- selective (By similarity)
MCL	13	Sky Blue	5	Vdac3	10090.ENSMUSP00000136273	Voltage-dependent anion-selective channel protein 3; Forms a channel through the mitochondrial outer membrane that allows diffusion of small hydrophilic molecules
MCL	14	Cornflower Blue 2	4	Hsp90aa1	10090.ENSMUSP00000091921	Heat shock protein HSP 90-alpha; Molecular chaperone that promotes the maturation, structural maintenance and proper regulation of specific target proteins involved for instance in cell cycle control and signal transduction. Undergoes a functional cycle that is linked to its ATPase activity which is essential for its chaperone activity. This cycle probably induces conformational changes in the cl…
MCL	14	Cornflower Blue 2	4	Hsp90ab1	10090.ENSMUSP00000024739	Heat shock protein HSP 90-beta; Molecular chaperone that promotes the maturation, structural maintenance and proper regulation of specific target proteins involved for instance in cell cycle control and signal transduction. Undergoes a functional cycle that is linked to its ATPase activity. This cycle probably induces conformational changes in the client proteins, thereby causing their activation…
MCL	14	Cornflower Blue 2	4	Hspe1	10090.ENSMUSP00000074724	10 kDa heat shock protein, mitochondrial; Co-chaperonin implicated in mitochondrial protein import and macromolecular assembly. Together with Hsp60, facilitates the correct folding of imported proteins. May also prevent misfolding and promote the refolding and proper assembly of unfolded polypeptides generated under stress conditions in the mitochondrial matrix. The functional units of these chap…
MCL	14	Cornflower Blue 2	4	Nrip1	10090.ENSMUSP00000051726	Nuclear receptor-interacting protein 1; Modulates transcriptional repression by nuclear hormone receptors such as NR2C1, thyroid hormone receptor and retinoic acid receptor/RARA. Essential for cumulus expansion and follicle rupture during ovulation. Also controls the balance between fat accumulation and energy expenditure. Positive regulator of the circadian clock gene expression: stimulates tran…
MCL	15	Blue	4	Anxa1	10090.ENSMUSP00000025561	Annexin A1; Plays important roles in the innate immune response as effector of glucocorticoid-mediated responses and regulator of the inflammatory process. Has anti-inflammatory activity. Plays a role in glucocorticoid-mediated down- regulation of the early phase of the inflammatory response. Promotes resolution of inflammation and wound healing. Functions at least in part by activating the formy…
MCL	15	Blue	4	Gnb1	10090.ENSMUSP00000030940	Guanine nucleotide-binding protein G(I)/G(S)/G(T) subunit beta-1; Guanine nucleotide-binding proteins (G proteins) are involved as a modulator or transducer in various transmembrane signaling systems. The beta and gamma chains are required for the GTPase activity, for replacement of GDP by GTP, and for G protein- effector interaction (By similarity)
MCL	15	Blue	4	Gnb2	10090.ENSMUSP00000031726	Guanine nucleotide-binding protein G(I)/G(S)/G(T) subunit beta-2; Guanine nucleotide-binding proteins (G proteins) are involved as a modulator or transducer in various transmembrane signaling systems. The beta and gamma chains are required for the GTPase activity, for replacement of GDP by GTP, and for G protein- effector interaction
MCL	15	Blue	4	Psap	10090.ENSMUSP00000101105	Prosaposin; Saposins are specific low-molecular mass non-enzymic proteins, they participate in the lysosomal degradation of sphingolipids, which takes place by the sequential action of specific hydrolases
MCL	16	Cornflower Blue	2	Tuba1b	10090.ENSMUSP00000076777	Tubulin alpha-1B chain; Tubulin is the major constituent of microtubules. It binds two moles of GTP, one at an exchangeable site on the beta chain and one at a non-exchangeable site on the alpha chain; Belongs to the tubulin family
MCL	16	Cornflower Blue	2	Tubb6	10090.ENSMUSP00000001513	Tubulin beta-6 chain; Tubulin is the major constituent of microtubules. It binds two moles of GTP, one at an exchangeable site on the beta chain and one at a non-exchangeable site on the alpha chain (By similarity)
MCL	17	Purple	2	Gapdh	10090.ENSMUSP00000113942	Glyceraldehyde-3-phosphate dehydrogenase; Has both glyceraldehyde-3-phosphate dehydrogenase and nitrosylase activities, thereby playing a role in glycolysis and nuclear functions, respectively. Glyceraldehyde-3-phosphate dehydrogenase is a key enzyme in glycolysis that catalyzes the first step of the pathway by converting D-glyceraldehyde 3- phosphate (G3P) into 3-phospho-D-glyceroyl phosphate. M…
MCL	17	Purple	2	Hmox1	10090.ENSMUSP00000005548	Heme oxygenase 1; Heme oxygenase cleaves the heme ring at the alpha methene bridge to form biliverdin. Biliverdin is subsequently converted to bilirubin by biliverdin reductase. Under physiological conditions, the activity of heme oxygenase is highest in the spleen, where senescent erythrocytes are sequestrated and destroyed. Exhibits cytoprotective effects since excess of free heme sensitizes ce…
MCL	18	Medium Purple	2	Pygm	10090.ENSMUSP00000047564	Glycogen phosphorylase, muscle form; Phosphorylase is an important allosteric enzyme in carbohydrate metabolism. Enzymes from different sources differ in their regulatory mechanisms and in their natural substrates. However, all known phosphorylases share catalytic and structural properties
MCL	18	Medium Purple	2	Ugp2	10090.ENSMUSP00000099939	UTP--glucose-1-phosphate uridylyltransferase; Plays a central role as a glucosyl donor in cellular metabolic pathways
MCL	19	Medium Purple 2	2	Clta	10090.ENSMUSP00000103481	Clathrin light chain A; Clathrin is the major protein of the polyhedral coat of coated pits and vesicles. Acts as component of the TACC3/ch- TOG/clathrin complex proposed to contribute to stabilization of kinetochore fibers of the mitotic spindle by acting as inter- microtubule bridge (By similarity)
MCL	19	Medium Purple 2	2	Ehd2	10090.ENSMUSP00000096397	EH domain-containing protein 2; ATP- and membrane-binding protein that controls membrane reorganization/tubulation upon ATP hydrolysis. Plays a role in membrane trafficking between the plasma membrane and endosomes. Important for the internalization of GLUT4. Required for fusion of myoblasts to skeletal muscle myotubes. Required for normal translocation of FER1L5 to the plasma membrane. Regulates…
MCL	20	Orchid 3	2	Aspn	10090.ENSMUSP00000021820	Asporin; Binds calcium and plays a role in osteoblast-driven collagen biomineralization activity (By similarity). Critical regulator of TGF-beta in articular cartilage and plays an essential role in cartilage homeostasis and osteoarthritis (OA) pathogenesis. Negatively regulates chondrogenesis in the articular cartilage by blocking the TGF-beta/receptor interaction on the cell surface and inhibit…
MCL	20	Orchid 3	2	Ogn	10090.ENSMUSP00000021822	Mimecan; Induces bone formation in conjunction with TGF-beta-1 or TGF-beta-2
MCL	21	Orchid 2	2	Dpysl2	10090.ENSMUSP00000022629	Dihydropyrimidinase-related protein 2; Plays a role in neuronal development and polarity, as well as in axon growth and guidance, neuronal growth cone collapse and cell migration. Necessary for signaling by class 3 semaphorins and subsequent remodeling of the cytoskeleton. May play a role in endocytosis; Belongs to the metallo-dependent hydrolases superfamily. Hydantoinase/dihydropyrimidinase fam…
MCL	21	Orchid 2	2	Dpysl3	10090.ENSMUSP00000025379	Dihydropyrimidinase-related protein 3; Necessary for signaling by class 3 semaphorins and subsequent remodeling of the cytoskeleton. Plays a role in axon guidance, neuronal growth cone collapse and cell migration (By similarity); Belongs to the metallo-dependent hydrolases superfamily. Hydantoinase/dihydropyrimidinase family
MCL	22	Violet	2	Prdx1	10090.ENSMUSP00000114159	Peroxiredoxin-1; Thiol-specific peroxidase that catalyzes the reduction of hydrogen peroxide and organic hydroperoxides to water and alcohols, respectively. Plays a role in cell protection against oxidative stress by detoxifying peroxides and as sensor of hydrogen peroxide-mediated signaling events. Might participate in the signaling cascades of growth factors and tumor necrosis factor-alpha by r…
MCL	22	Violet	2	Prdx3	10090.ENSMUSP00000025961	Thioredoxin-dependent peroxide reductase, mitochondrial; Thiol-specific peroxidase that catalyzes the reduction of hydrogen peroxide and organic hydroperoxides to water and alcohols, respectively. Plays a role in cell protection against oxidative stress by detoxifying peroxides
MCL	23	Violet 2	2	Acadl	10090.ENSMUSP00000027153	Long-chain specific acyl-CoA dehydrogenase, mitochondrial; acyl-Coenzyme A dehydrogenase, long-chain
MCL	23	Violet 2	2	Cpt1b	10090.ENSMUSP00000104936	Carnitine O-palmitoyltransferase 1, muscle isoform; Carnitine palmitoyltransferase 1b, muscle
MCL	24	Orchid	2	Ipo5	10090.ENSMUSP00000032898	Importin-5; Functions in nuclear protein import as nuclear transport receptor. Serves as receptor for nuclear localization signals (NLS) in cargo substrates. Is thought to mediate docking of the importin/substrate complex to the nuclear pore complex (NPC) through binding to nucleoporin and the complex is subsequently translocated through the pore by an energy requiring, Ran- dependent mechanism. …
MCL	24	Orchid	2	Tnpo1	10090.ENSMUSP00000105028	Transportin-1; Functions in nuclear protein import as nuclear transport receptor. Serves as receptor for nuclear localization signals (NLS) in cargo substrates. Is thought to mediate docking of the importin/substrate complex to the nuclear pore complex (NPC) through binding to nucleoporin and the complex is subsequently translocated through the pore by an energy requiring, Ran-dependent mechanism…
MCL	25	Pink	2	Ak1	10090.ENSMUSP00000068479	Adenylate kinase isoenzyme 1; Catalyzes the reversible transfer of the terminal phosphate group between ATP and AMP. Also possesses broad nucleoside diphosphate kinase activity. Plays an important role in cellular energy homeostasis and in adenine nucleotide metabolism (By similarity). May provide a mechanism to buffer the adenylate energy charge for sperm motility
MCL	25	Pink	2	Ampd1	10090.ENSMUSP00000088217	AMP deaminase 1; AMP deaminase plays a critical role in energy metabolism
MCL	26	Pale Violet Red	2	Atp1a1	10090.ENSMUSP00000039657	Sodium/potassium-transporting ATPase subunit alpha-1; This is the catalytic component of the active enzyme, which catalyzes the hydrolysis of ATP coupled with the exchange of sodium and potassium ions across the plasma membrane. This action creates the electrochemical gradient of sodium and potassium ions, providing the energy for active transport of various nutrients (By similarity); Belongs to …
MCL	26	Pale Violet Red	2	Atp1b3	10090.ENSMUSP00000034983	Sodium/potassium-transporting ATPase subunit beta-3; This is the non-catalytic component of the active enzyme, which catalyzes the hydrolysis of ATP coupled with the exchange of Na(+) and K(+) ions across the plasma membrane. The exact function of the beta-3 subunit is not known
MCL	27	Light Coral	2	Aifm1	10090.ENSMUSP00000041104	Apoptosis-inducing factor 1, mitochondrial; Functions both as NADH oxidoreductase and as regulator of apoptosis. In response to apoptotic stimuli, it is released from the mitochondrion intermembrane space into the cytosol and to the nucleus, where it functions as a proapoptotic factor in a caspase-independent pathway. In contrast, functions as an antiapoptotic factor in normal mitochondria via it…
MCL	27	Light Coral	2	Ppia	10090.ENSMUSP00000117987	Peptidyl-prolyl cis-trans isomerase A; PPIases accelerate the folding of proteins. It catalyzes the cis-trans isomerization of proline imidic peptide bonds in oligopeptides; Belongs to the cyclophilin-type PPIase family. PPIase A subfamily

## Sheet: skin
#clustering method	cluster number	cluster color	gene count	protein name	protein identifier	protein description
MCL	1	Red	4	Alb	10090.ENSMUSP00000031314	Serum albumin; Serum albumin, the main protein of plasma, has a good binding capacity for water, Ca(2+), Na(+), K(+), fatty acids, hormones, bilirubin and drugs. Its main function is the regulation of the colloidal osmotic pressure of blood. Major zinc transporter in plasma, typically binds about 80% of all plasma zinc; Belongs to the ALB/AFP/VDB family
MCL	1	Red	4	Hsp90b1	10090.ENSMUSP00000020238	Endoplasmin; Molecular chaperone that functions in the processing and transport of secreted proteins. When associated with CNPY3, required for proper folding of Toll-like receptors. Functions in endoplasmic reticulum associated degradation (ERAD). Has ATPase activity (By similarity)
MCL	1	Red	4	Lamb2	10090.ENSMUSP00000069087	Laminin subunit beta-2; Binding to cells via a high affinity receptor, laminin is thought to mediate the attachment, migration and organization of cells into tissues during embryonic development by interacting with other extracellular matrix components
MCL	1	Red	4	Nid1	10090.ENSMUSP00000005532	Nidogen-1; Sulfated glycoprotein widely distributed in basement membranes and tightly associated with laminin. Also binds to collagen IV and perlecan. It probably has a role in cell- extracellular matrix interactions
MCL	2	Brown	4	Atp5f1	10090.ENSMUSP00000113022	ATP synthase F(0) complex subunit B1, mitochondrial; Mitochondrial membrane ATP synthase (F(1)F(0) ATP synthase or Complex V) produces ATP from ADP in the presence of a proton gradient across the membrane which is generated by electron transport complexes of the respiratory chain. F-type ATPases consist of two structural domains, F(1) - containing the extramembraneous catalytic core, and F(0) - c…
MCL	2	Brown	4	Atp6v0c	10090.ENSMUSP00000024932	V-type proton ATPase 16 kDa proteolipid subunit; Proton-conducting pore forming subunit of the membrane integral V0 complex of vacuolar ATPase. V-ATPase is responsible for acidifying a variety of intracellular compartments in eukaryotic cells
MCL	2	Brown	4	Gbas	10090.ENSMUSP00000083211	Protein NipSnap homolog 2; May act as a positive regulator of L-type calcium channels
MCL	2	Brown	4	Sdhb	10090.ENSMUSP00000010007	Succinate dehydrogenase [ubiquinone] iron-sulfur subunit, mitochondrial; Iron-sulfur protein (IP) subunit of succinate dehydrogenase (SDH) that is involved in complex II of the mitochondrial electron transport chain and is responsible for transferring electrons from succinate to ubiquinone (coenzyme Q)
MCL	3	Olive	3	Gm5093	10090.ENSMUSP00000127966	Predicted gene 5093; Belongs to the universal ribosomal protein uL5 family
MCL	3	Olive	3	Rpl12	10090.ENSMUSP00000117461	60S ribosomal protein L12; Binds directly to 26S ribosomal RNA
MCL	3	Olive	3	Rplp1	10090.ENSMUSP00000008036	60S acidic ribosomal protein P1; Plays an important role in the elongation step of protein synthesis
MCL	4	Green	3	Actb	10090.ENSMUSP00000098066	Actin, cytoplasmic 1; Actins are highly conserved proteins that are involved in various types of cell motility and are ubiquitously expressed in all eukaryotic cells; Belongs to the actin family
MCL	4	Green	3	Actg1	10090.ENSMUSP00000071486	Actin, cytoplasmic 2; Actins are highly conserved proteins that are involved in various types of cell motility and are ubiquitously expressed in all eukaryotic cells
MCL	4	Green	3	Myl6	10090.ENSMUSP00000128803	Myosin light polypeptide 6; Regulatory light chain of myosin. Does not bind calcium
MCL	5	Blue	2	Pgam1	10090.ENSMUSP00000011896	Phosphoglycerate mutase 1; Interconversion of 3- and 2-phosphoglycerate with 2,3- bisphosphoglycerate as the primer of the reaction. Can also catalyze the reaction of EC 5.4.2.4 (synthase), but with a reduced activity
MCL	5	Blue	2	Pgam2	10090.ENSMUSP00000020768	Phosphoglycerate mutase 2; Interconversion of 3- and 2-phosphoglycerate with 2,3- bisphosphoglycerate as the primer of the reaction. Can also catalyze the reaction of EC 5.4.2.4 (synthase), but with a reduced activity
MCL	6	Light Sky Blue	2	Cct2	10090.ENSMUSP00000036288	T-complex protein 1 subunit beta; Molecular chaperone; assists the folding of proteins upon ATP hydrolysis. As part of the BBS/CCT complex may play a role in the assembly of BBSome, a complex involved in ciliogenesis regulating transports vesicles to the cilia. Known to play a role, in vitro, in the folding of actin and tubulin; Belongs to the TCP-1 chaperonin family
MCL	6	Light Sky Blue	2	Prdx6	10090.ENSMUSP00000071636	Peroxiredoxin-6; Thiol-specific peroxidase that catalyzes the reduction of hydrogen peroxide and organic hydroperoxides to water and alcohols, respectively. Can reduce H(2)O(2) and short chain organic, fatty acid, and phospholipid hydroperoxides. Also has phospholipase activity, and can therefore either reduce the oxidized sn-2 fatty acyl grup of phospholipids (peroxidase activity) or hydrolyze t…
MCL	7	Medium Blue	2	Psmc3	10090.ENSMUSP00000071054	26S proteasome regulatory subunit 6A; Component of the 26S proteasome, a multiprotein complex involved in the ATP-dependent degradation of ubiquitinated proteins. This complex plays a key role in the maintenance of protein homeostasis by removing misfolded or damaged proteins, which could impair cellular functions, and by removing proteins whose functions are no longer required. Therefore, the pr…
MCL	7	Medium Blue	2	Psme2	10090.ENSMUSP00000123798	Proteasome activator complex subunit 2; Implicated in immunoproteasome assembly and required for efficient antigen processing. The PA28 activator complex enhances the generation of class I binding peptides by altering the cleavage pattern of the proteasome

## Sheet: plasma
#clustering method	cluster number	cluster color	gene count	protein name	protein identifier	protein description
MCL	1	Red	40	A2m	10090.ENSMUSP00000032203	Alpha-2-macroglobulin-P; Is able to inhibit all four classes of proteinases by a unique 'trapping' mechanism. This protein has a peptide stretch, called the 'bait region' which contains specific cleavage sites for different proteinases. When a proteinase cleaves the bait region, a conformational change is induced in the protein which traps the proteinase. The entrapped enzyme remains active again…
MCL	1	Red	40	Agt	10090.ENSMUSP00000066488	Angiotensinogen; Essential component of the renin-angiotensin system (RAS), a potent regulator of blood pressure, body fluid and electrolyte homeostasis; Belongs to the serpin family
MCL	1	Red	40	Alb	10090.ENSMUSP00000031314	Serum albumin; Serum albumin, the main protein of plasma, has a good binding capacity for water, Ca(2+), Na(+), K(+), fatty acids, hormones, bilirubin and drugs. Its main function is the regulation of the colloidal osmotic pressure of blood. Major zinc transporter in plasma, typically binds about 80% of all plasma zinc; Belongs to the ALB/AFP/VDB family
MCL	1	Red	40	Apoa1	10090.ENSMUSP00000034588	Apolipoprotein A-I; Participates in the reverse transport of cholesterol from tissues to the liver for excretion by promoting cholesterol efflux from tissues and by acting as a cofactor for the lecithin cholesterol acyltransferase (LCAT). As part of the SPAP complex, activates spermatozoa motility; Belongs to the apolipoprotein A1/A4/E family
MCL	1	Red	40	Apoa2	10090.ENSMUSP00000005824	Apolipoprotein A-II; May stabilize HDL (high density lipoprotein) structure by its association with lipids, and affect the HDL metabolism; Belongs to the apolipoprotein A2 family
MCL	1	Red	40	Apoa4	10090.ENSMUSP00000034585	Apolipoprotein A-IV; May have a role in chylomicrons and VLDL secretion and catabolism. Required for efficient activation of lipoprotein lipase by ApoC-II; potent activator of LCAT. Apoa-IV is a major component of HDL and chylomicrons; Belongs to the apolipoprotein A1/A4/E family
MCL	1	Red	40	Apob	10090.ENSMUSP00000036044	Apolipoprotein B-100; Apolipoprotein B is a major protein constituent of chylomicrons (apo B-48), LDL (apo B-100) and VLDL (apo B-100). Apo B-100 functions as a recognition signal for the cellular binding and internalization of LDL particles by the apoB/E receptor
MCL	1	Red	40	Apoc1	10090.ENSMUSP00000104091	Apolipoprotein C-I; Inhibitor of lipoprotein binding to the low density lipoprotein (LDL) receptor, LDL receptor-related protein, and very low density lipoprotein (VLDL) receptor. Associates with high density lipoproteins (HDL) and the triacylglycerol-rich lipoproteins in the plasma and makes up about 10% of the protein of the VLDL and 2% of that of HDL. Appears to interfere directly with fatty a…
MCL	1	Red	40	Apoc2	10090.ENSMUSP00000115173	Apolipoprotein C-II; Component of chylomicrons, very low-density lipoproteins (VLDL), low-density lipoproteins (LDL), and high-density lipoproteins (HDL) in plasma. Plays an important role in lipoprotein metabolism as an activator of lipoprotein lipase
MCL	1	Red	40	Apoc3	10090.ENSMUSP00000034586	Apolipoprotein C-III; Component of triglyceride-rich very low density lipoproteins (VLDL) and high density lipoproteins (HDL) in plasma. Plays a multifaceted role in triglyceride homeostasis. Intracellularly, promotes hepatic very low density lipoprotein 1 (VLDL1) assembly and secretion; extracellularly, attenuates hydrolysis and clearance of triglyceride-rich lipoproteins (TRLs). Impairs the lip…
MCL	1	Red	40	C3	10090.ENSMUSP00000024988	Complement C3; C3 plays a central role in the activation of the complement system. Its processing by C3 convertase is the central reaction in both classical and alternative complement pathways. After activation C3b can bind covalently, via its reactive thioester, to cell surface carbohydrates or immune aggregates
MCL	1	Red	40	C4b	10090.ENSMUSP00000069418	Complement C4-B; Non-enzymatic component of C3 and C5 convertases and thus essential for the propagation of the classical complement pathway. Covalently binds to immunoglobulins and immune complexes and enhances the solubilization of immune aggregates and the clearance of IC through CR1 on erythrocytes. Catalyzes the transacylation of the thioester carbonyl group to form ester bonds with carbohyd…
MCL	1	Red	40	C7	10090.ENSMUSP00000106317	Complement component 7
MCL	1	Red	40	Cfd	10090.ENSMUSP00000056836	Complement factor D; Factor D cleaves factor B when the latter is complexed with factor C3b, activating the C3bbb complex, which then becomes the C3 convertase of the alternate pathway. Its function is homologous to that of C1s in the classical pathway
MCL	1	Red	40	Cfi	10090.ENSMUSP00000077074	Complement factor I; Responsible for cleaving the alpha-chains of C4b and C3b in the presence of the cofactors C4-binding protein and factor H respectively
MCL	1	Red	40	Clu	10090.ENSMUSP00000022616	Clusterin; Functions as extracellular chaperone that prevents aggregation of nonnative proteins. Prevents stress-induced aggregation of blood plasma proteins. Inhibits formation of amyloid fibrils by APP, APOC2, B2M, CALCA, CSN3, SNCA and aggregation-prone LYZ variants (in vitro). Does not require ATP. Maintains partially unfolded proteins in a state appropriate for subsequent refolding by other …
MCL	1	Red	40	Cp	10090.ENSMUSP00000088857	Ceruloplasmin; Ceruloplasmin is a blue, copper-binding (6-7 atoms per molecule) glycoprotein. It has ferroxidase activity oxidizing Fe(2+) to Fe(3+) without releasing radical oxygen species. It is involved in iron transport across the cell membrane. Provides Cu(2+) ions for the ascorbate-mediated deaminase degradation of the heparan sulfate chains of GPC1. May also play a role in fetal lung devel…
MCL	1	Red	40	Cpn1	10090.ENSMUSP00000026210	Carboxypeptidase N catalytic chain; Protects the body from potent vasoactive and inflammatory peptides containing C-terminal Arg or Lys (such as kinins or anaphylatoxins) which are released into the circulation; Belongs to the peptidase M14 family
MCL	1	Red	40	Cpn2	10090.ENSMUSP00000069318	Carboxypeptidase N subunit 2; The 83 kDa subunit binds and stabilizes the catalytic subunit at 37 degrees Celsius and keeps it in circulation. Under some circumstances it may be an allosteric modifier of the catalytic subunit (By similarity)
MCL	1	Red	40	F2	10090.ENSMUSP00000028681	Prothrombin; Thrombin, which cleaves bonds after Arg and Lys, converts fibrinogen to fibrin and activates factors V, VII, VIII, XIII, and, in complex with thrombomodulin, protein C. Functions in blood homeostasis, inflammation and wound healing (By similarity)
MCL	1	Red	40	Fabp4	10090.ENSMUSP00000029041	Fatty acid-binding protein, adipocyte; Lipid transport protein in adipocytes. Binds both long chain fatty acids and retinoic acid. Delivers long-chain fatty acids and retinoic acid to their cognate receptors in the nucleus; Belongs to the calycin superfamily. Fatty-acid binding protein (FABP) family
MCL	1	Red	40	Gc	10090.ENSMUSP00000046636	Vitamin D-binding protein; Involved in vitamin D transport and storage, scavenging of extracellular G-actin, enhancement of the chemotactic activity of C5 alpha for neutrophils in inflammation and macrophage activation
MCL	1	Red	40	Hpx	10090.ENSMUSP00000033185	Hemopexin; Binds heme and transports it to the liver for breakdown and iron recovery, after which the free hemopexin returns to the circulation
MCL	1	Red	40	Itih3	10090.ENSMUSP00000006697	Inter-alpha-trypsin inhibitor heavy chain H3; May act as a carrier of hyaluronan in serum or as a binding protein between hyaluronan and other matrix protein, including those on cell surfaces in tissues to regulate the localization, synthesis and degradation of hyaluronan which are essential to cells undergoing biological processes
MCL	1	Red	40	Kng1	10090.ENSMUSP00000023589	Kininogen-1; (1) Kininogens are inhibitors of thiol proteases; (2) HMW-kininogen plays an important role in blood coagulation by helping to position optimally prekallikrein and factor XI next to factor XII; (3) HMW-kininogen inhibits the thrombin- and plasmin- induced aggregation of thrombocytes; (4) the active peptide bradykinin that is released from HMW-kininogen shows a variety of physiologica…
MCL	1	Red	40	Masp2	10090.ENSMUSP00000049729	Mannan-binding lectin serine protease 2; Serum protease that plays an important role in the activation of the complement system via mannose-binding lectin. After activation by auto-catalytic cleavage it cleaves C2 and C4, leading to their activation and to the formation of C3 convertase (By similarity); Belongs to the peptidase S1 family
MCL	1	Red	40	Plg	10090.ENSMUSP00000014578	Plasminogen; Plasmin dissolves the fibrin of blood clots and acts as a proteolytic factor in a variety of other processes including embryonic development, tissue remodeling, tumor invasion, and inflammation. In ovulation, weakens the walls of the Graafian follicle. It activates the urokinase-type plasminogen activator, collagenases and several complement zymogens, such as C1 and C5. Cleavage of f…
MCL	1	Red	40	Pzp	10090.ENSMUSP00000032510	Pregnancy zone protein; Is able to inhibit all four classes of proteinases by a unique 'trapping' mechanism. This protein has a peptide stretch, called the 'bait region' which contains specific cleavage sites for different proteinases. When a proteinase cleaves the bait region, a conformational change is induced in the protein which traps the proteinase. The entrapped enzyme remains active agains…
MCL	1	Red	40	Saa4	10090.ENSMUSP00000006952	Serum amyloid A-4 protein; Major acute phase reactant. Apolipoprotein of the HDL complex
MCL	1	Red	40	Serpina10	10090.ENSMUSP00000048357	Protein Z-dependent protease inhibitor; Inhibits activity of the coagulation protease factor Xa in the presence of PROZ, calcium and phospholipids. Also inhibits factor XIa in the absence of cofactors (By similarity); Belongs to the serpin family
MCL	1	Red	40	Serpina1c	10090.ENSMUSP00000073695	Alpha-1-antitrypsin 1-3; Inhibitor of serine proteases. Can inhibit trypsin and chymotrypsin; relatively ineffective against elastase; Belongs to the serpin family
MCL	1	Red	40	Serpina1d	10090.ENSMUSP00000077909	Alpha-1-antitrypsin 1-4; Inhibitor of serine proteases. Can inhibit trypsin and chymotrypsin; relatively ineffective against elastase; Belongs to the serpin family
MCL	1	Red	40	Serpina1e	10090.ENSMUSP00000082130	Alpha-1-antitrypsin 1-5; Does not inhibit elastase or chymotrypsin. No target protease has been identified to date; Belongs to the serpin family
MCL	1	Red	40	Serpina3m	10090.ENSMUSP00000130979	Serine (or cysteine) peptidase inhibitor, clade A, member 3M; Belongs to the serpin family
MCL	1	Red	40	Serpinc1	10090.ENSMUSP00000068971	Antithrombin-III; Most important serine protease inhibitor in plasma that regulates the blood coagulation cascade. AT-III inhibits thrombin, matriptase-3/TMPRSS7, as well as factors IXa, Xa and XIa. Its inhibitory activity is greatly enhanced in the presence of heparin (By similarity)
MCL	1	Red	40	Serpinf2	10090.ENSMUSP00000048704	Alpha-2-antiplasmin; Serine protease inhibitor. The major targets of this inhibitor are plasmin and trypsin, but it also inactivates matriptase-3/TMPRSS7 and chymotrypsin (By similarity)
MCL	1	Red	40	Serping1	10090.ENSMUSP00000023994	Plasma protease C1 inhibitor; Activation of the C1 complex is under control of the C1- inhibitor. It forms a proteolytically inactive stoichiometric complex with the C1r or C1s proteases. May play a potentially crucial role in regulating important physiological pathways including complement activation, blood coagulation, fibrinolysis and the generation of kinins. Very efficient inhibitor of FXIIa…
MCL	1	Red	40	Trf	10090.ENSMUSP00000035158	Serotransferrin; Transferrins are iron binding transport proteins which can bind two Fe(3+) ions in association with the binding of an anion, usually bicarbonate. It is responsible for the transport of iron from sites of absorption and heme degradation to those of storage and utilization. Serum transferrin may also have a further role in stimulating cell proliferation
MCL	1	Red	40	Ttr	10090.ENSMUSP00000074783	Transthyretin; Thyroid hormone-binding protein. Probably transports thyroxine from the bloodstream to the brain
MCL	1	Red	40	Vtn	10090.ENSMUSP00000017488	Vitronectin; Vitronectin is a cell adhesion and spreading factor found in serum and tissues. Vitronectin interact with glycosaminoglycans and proteoglycans. Is recognized by certain members of the integrin family and serves as a cell-to-substrate adhesion molecule. Inhibitor of the membrane-damaging effect of the terminal cytolytic complement pathway
MCL	2	Yellow	4	Gm3839	10090.ENSMUSP00000138396	Glyceraldehyde-3-phosphate dehydrogenase; Predicted pseudogene 3839
MCL	2	Yellow	4	Mdh1	10090.ENSMUSP00000099938	Malate dehydrogenase, cytoplasmic; Malate dehydrogenase 1, NAD (soluble)
MCL	2	Yellow	4	Pkm	10090.ENSMUSP00000034834	Pyruvate kinase PKM; Glycolytic enzyme that catalyzes the transfer of a phosphoryl group from phosphoenolpyruvate (PEP) to ADP, generating ATP. Stimulates POU5F1-mediated transcriptional activation (By similarity)
MCL	2	Yellow	4	Tpi1	10090.ENSMUSP00000130858	Triosephosphate isomerase 1; Belongs to the triosephosphate isomerase family
MCL	3	Green	3	B2m	10090.ENSMUSP00000099534	Beta-2-microglobulin; Component of the class I major histocompatibility complex (MHC). Involved in the presentation of peptide antigens to the immune system; Belongs to the beta-2-microglobulin family
MCL	3	Green	3	H2-Q10	10090.ENSMUSP00000134163	H-2 class I histocompatibility antigen, Q10 alpha chain; Involved in the presentation of foreign antigens to the immune system
MCL	3	Green	3	Lrg1	10090.ENSMUSP00000038048	Leucine-rich alpha-2-glycoprotein 1
MCL	4	Blue	2	Ckm	10090.ENSMUSP00000003643	Creatine kinase M-type; Reversibly catalyzes the transfer of phosphate between ATP and various phosphogens (e.g. creatine phosphate). Creatine kinase isoenzymes play a central role in energy transduction in tissues with large, fluctuating energy demands, such as skeletal muscle, heart, brain and spermatozoa; Belongs to the ATP:guanido phosphotransferase family
MCL	4	Blue	2	Ttn	10090.ENSMUSP00000097561	Titin; Key component in the assembly and functioning of vertebrate striated muscles. By providing connections at the level of individual microfilaments, it contributes to the fine balance of forces between the two halves of the sarcomere. The size and extensibility of the cross-links are the main determinants of sarcomere extensibility properties of muscle. In non-muscle cells, seems to play a ro…
